# Supplementary material for: The DNA hypermethylation phenotype of colorectal cancer liver metastases resembles that of the primary colorectal cancers
Source: Springer Nature journal article supplement (doi:10.1186/s12885-020-06777-6), 2020-04-06

Supplementary Figure 2. Orjuela S. et al.

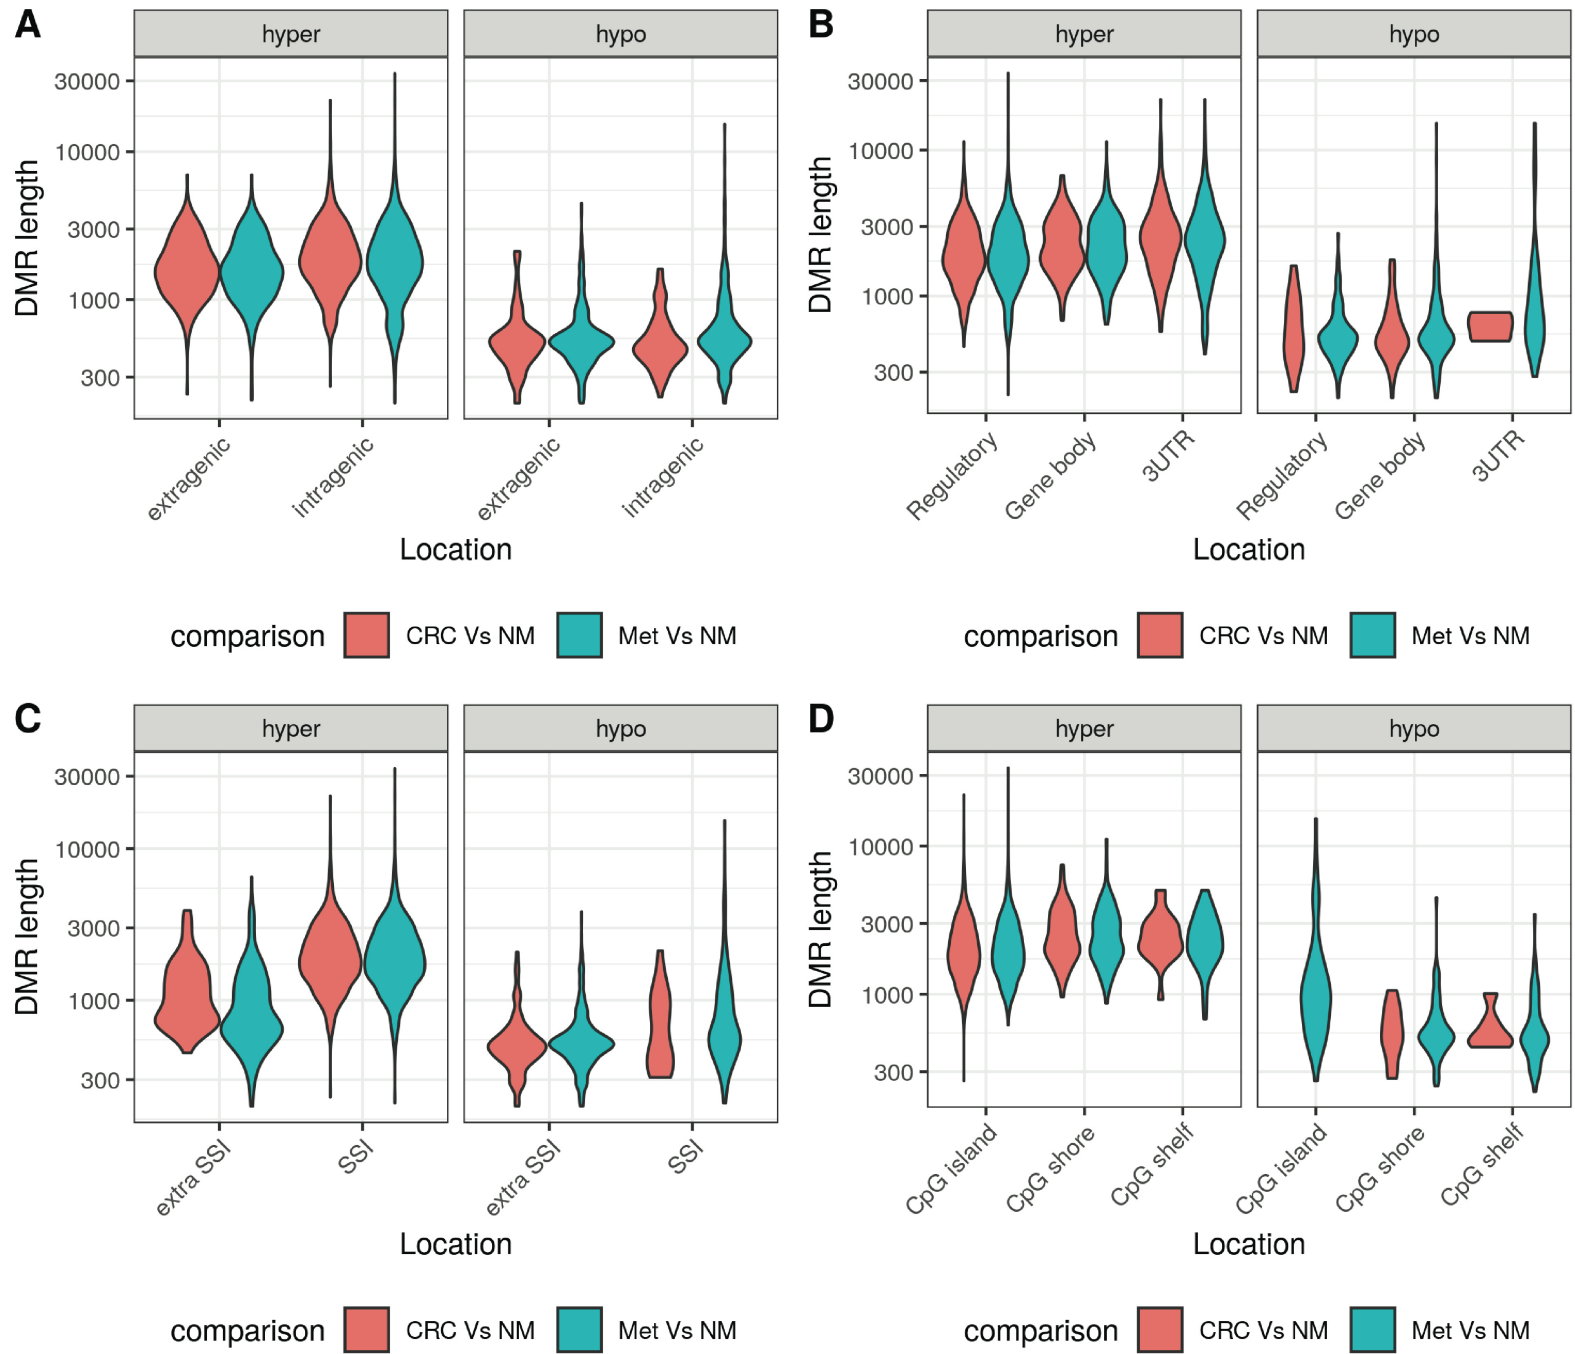

Supplement: MOESM2 [file 17870300]
