# Supplementary material for: The DNA hypermethylation phenotype of colorectal cancer liver metastases resembles that of the primary colorectal cancers
Source: Springer Nature journal article supplement (doi:10.1186/s12885-020-06777-6), 2020-04-06

A

Hypermethylated DMR (*EYA4* gene promoter, chromosome 6)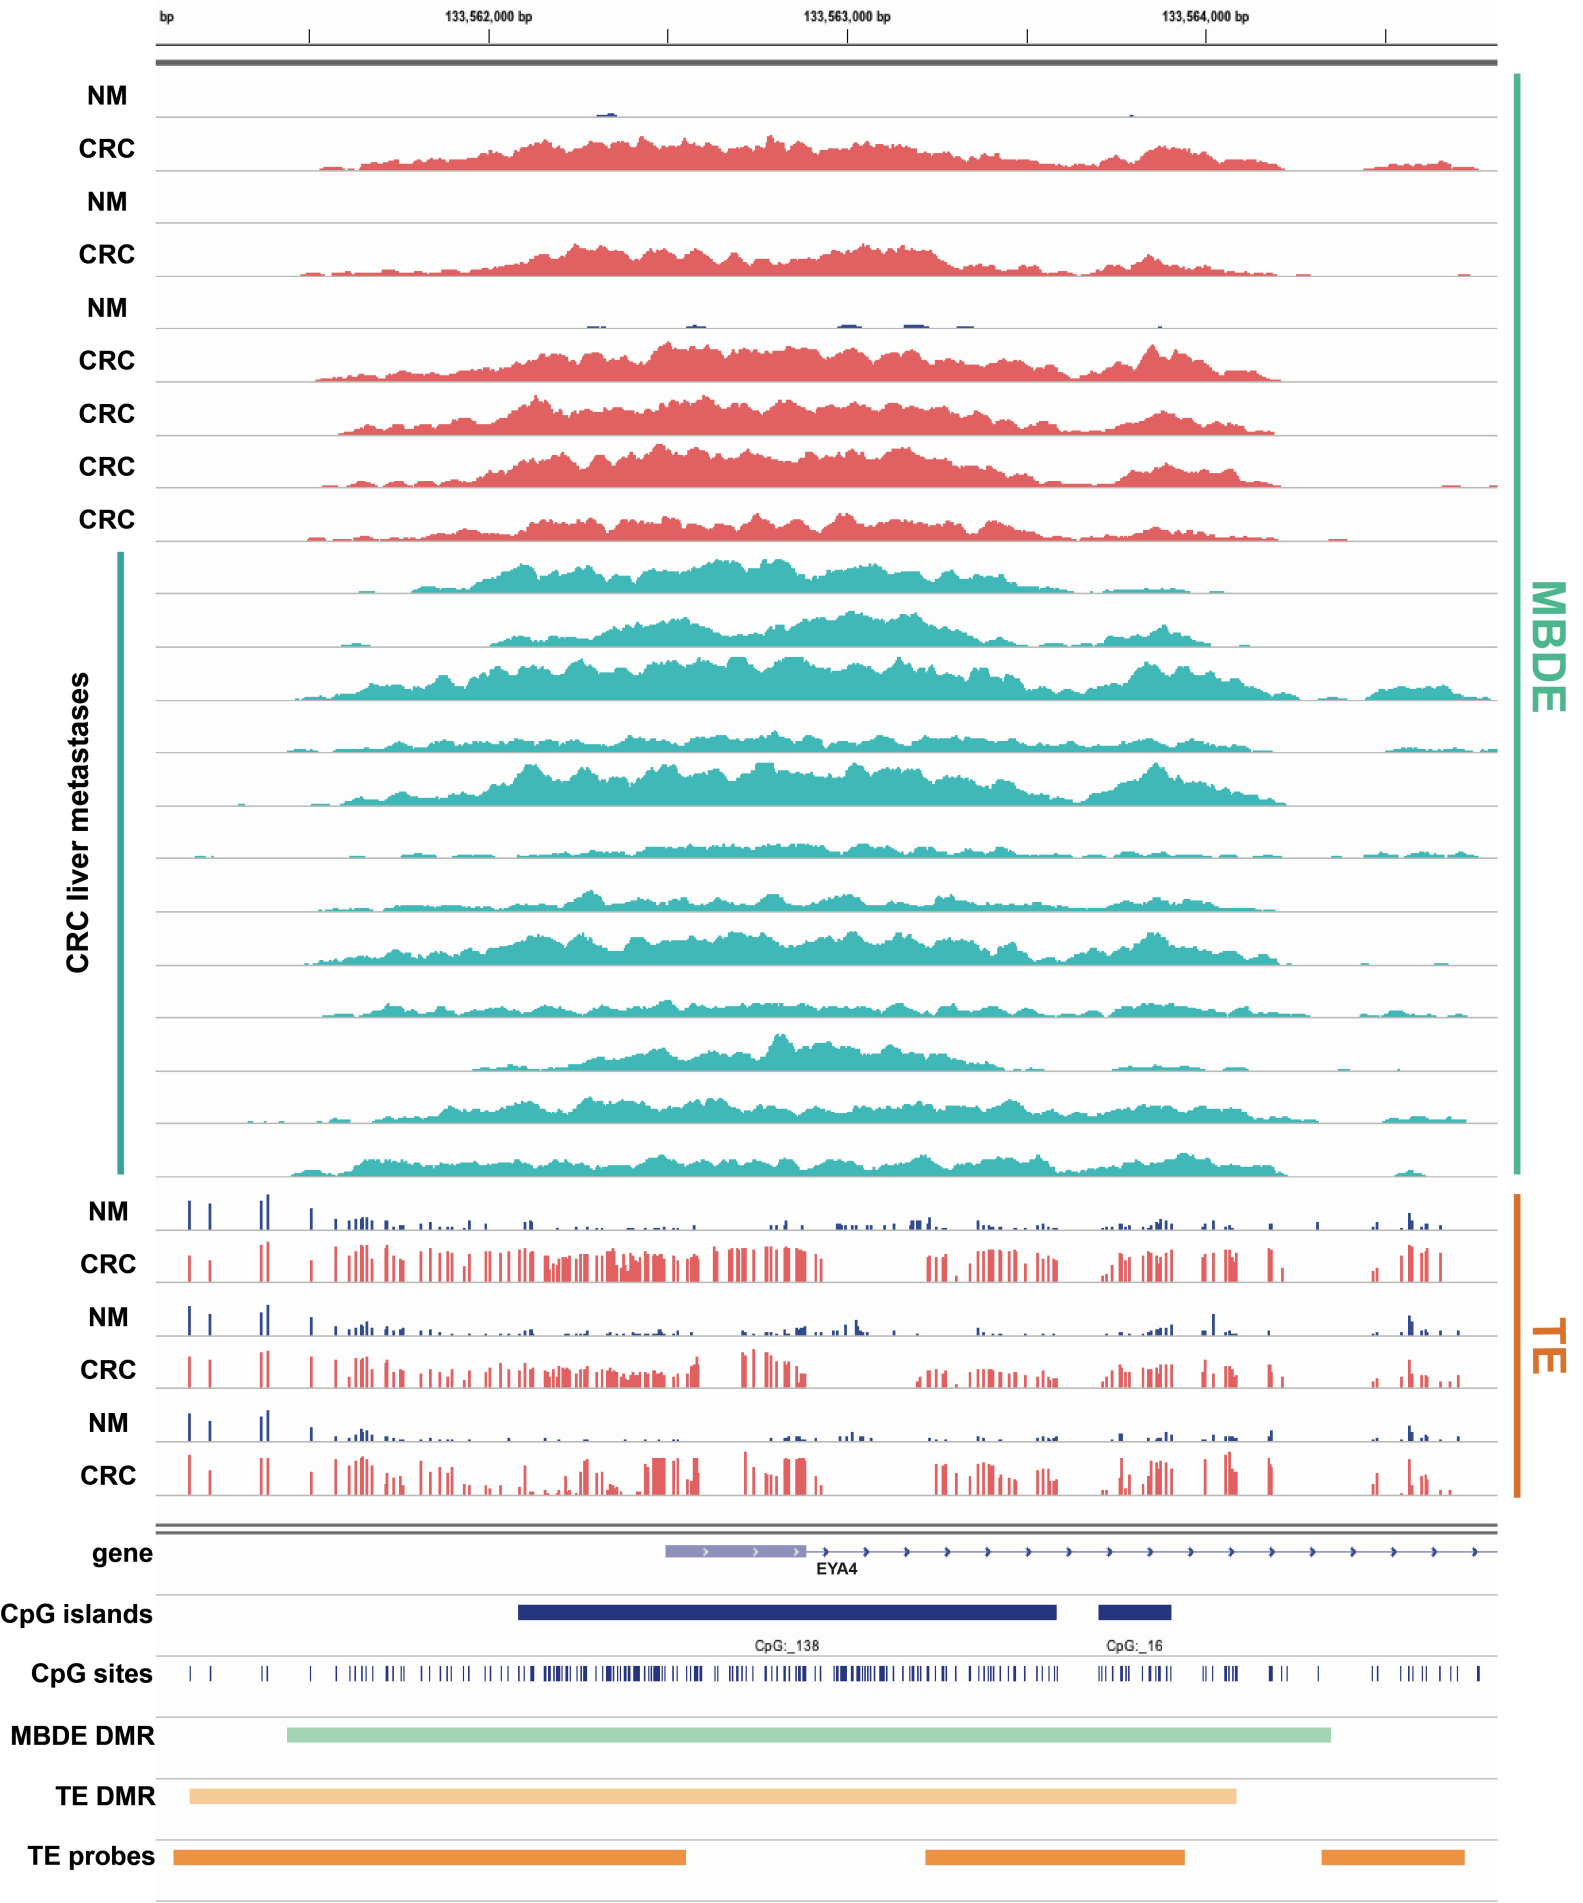

**B****Hypermethylated DMRs (*NBPF19* gene, chromosome 1)**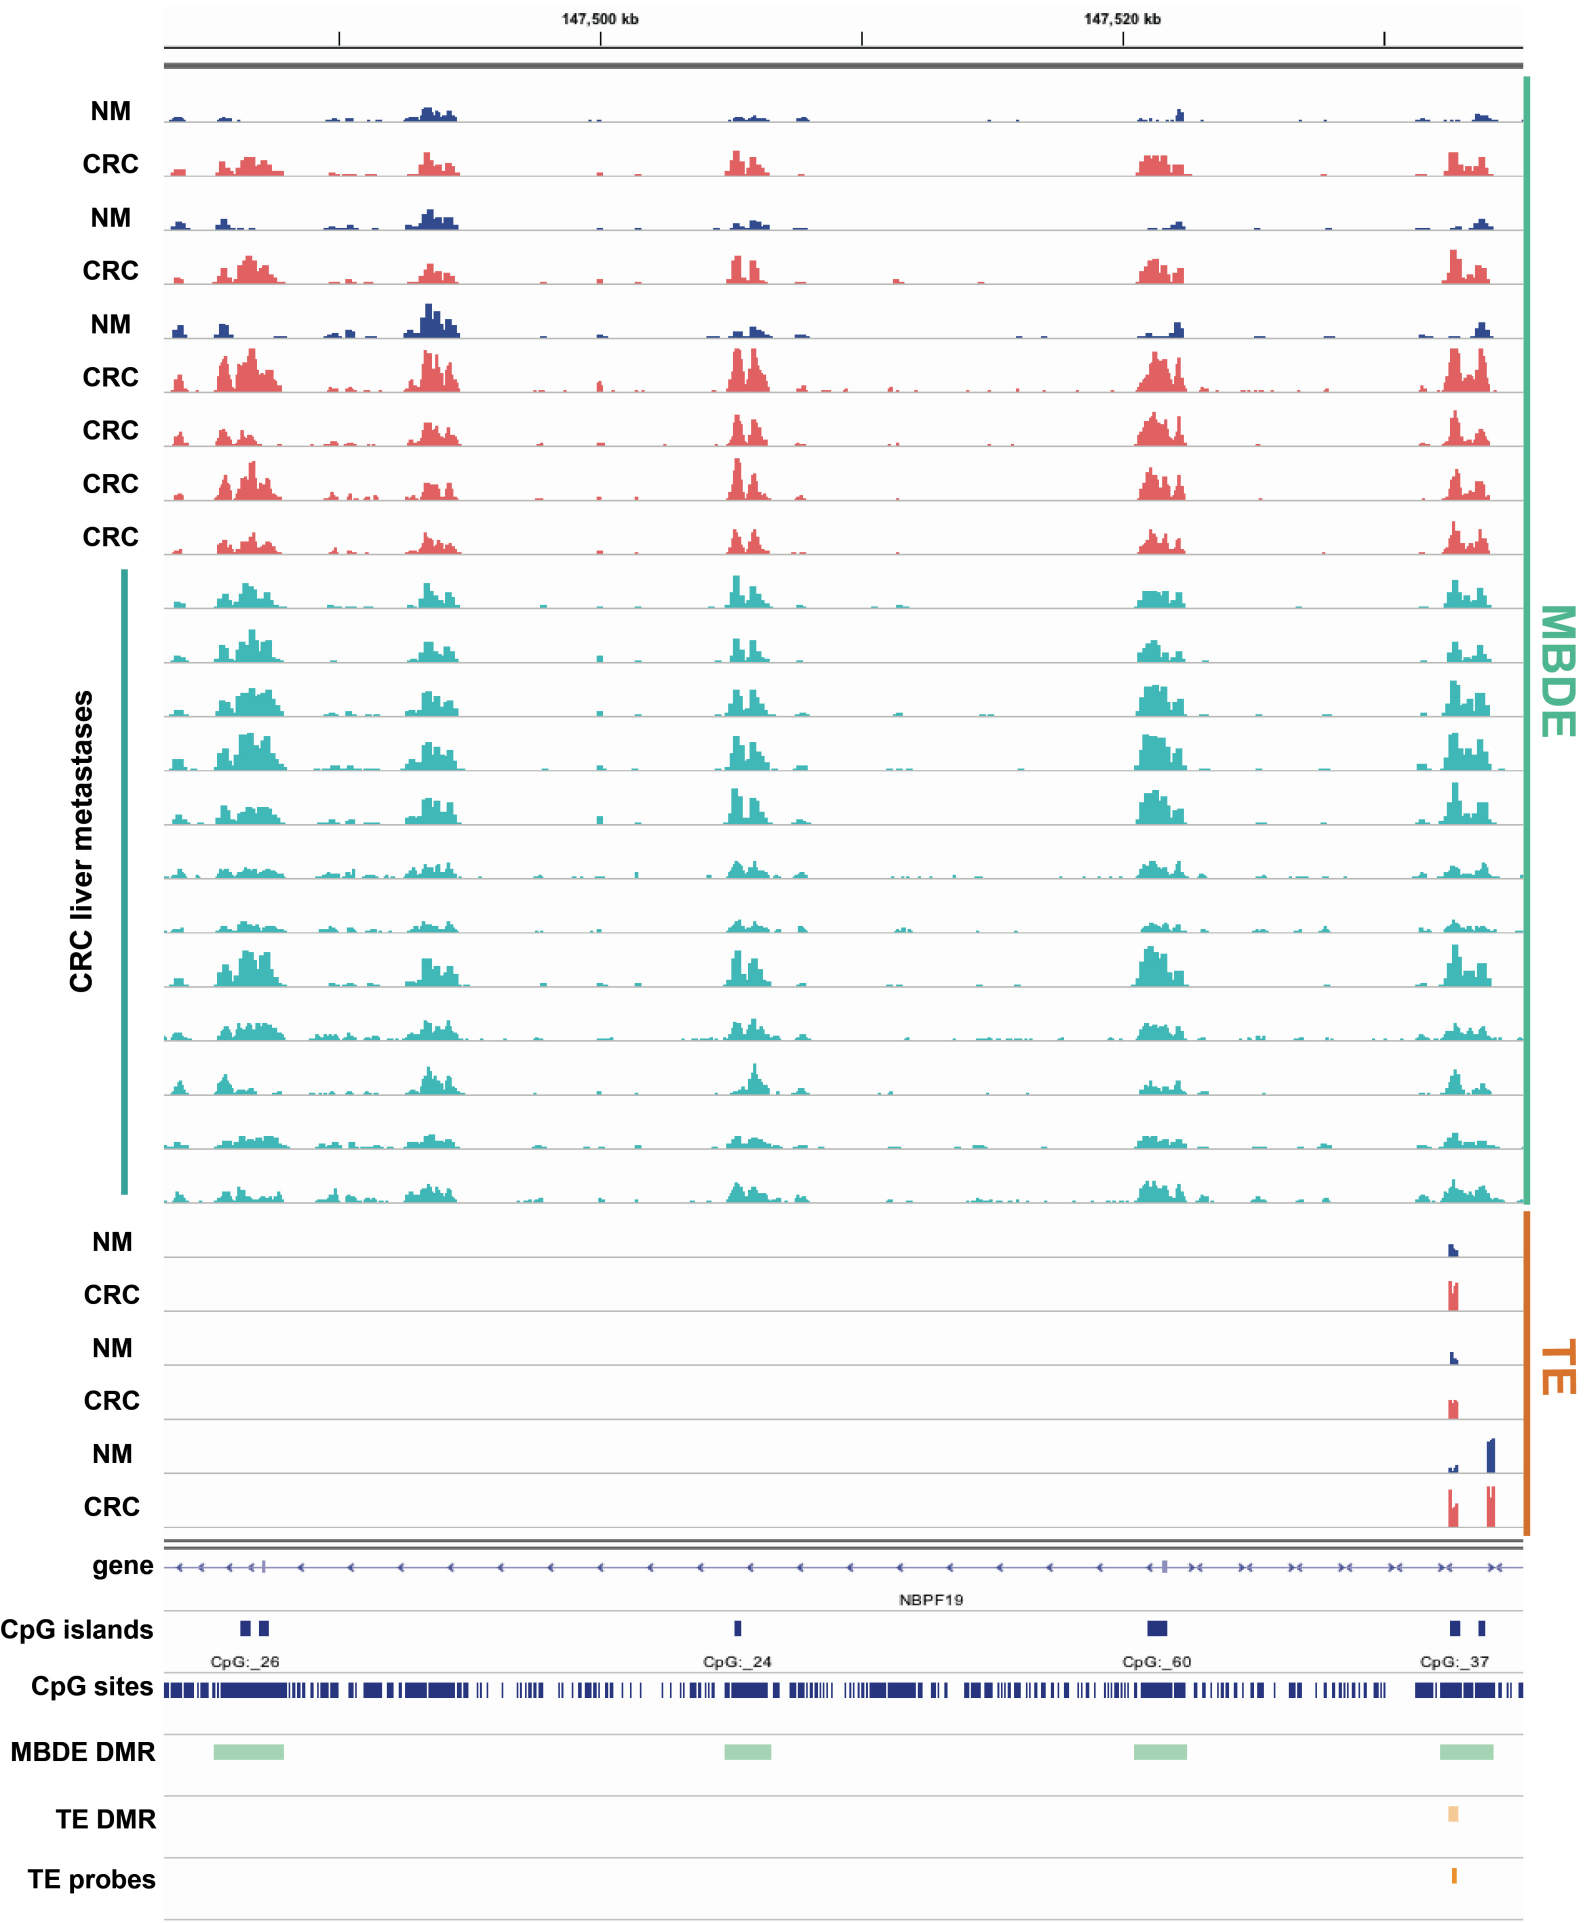

**C**

**Hypermethylated DMR (*MSX1* gene, chromosome 4)**

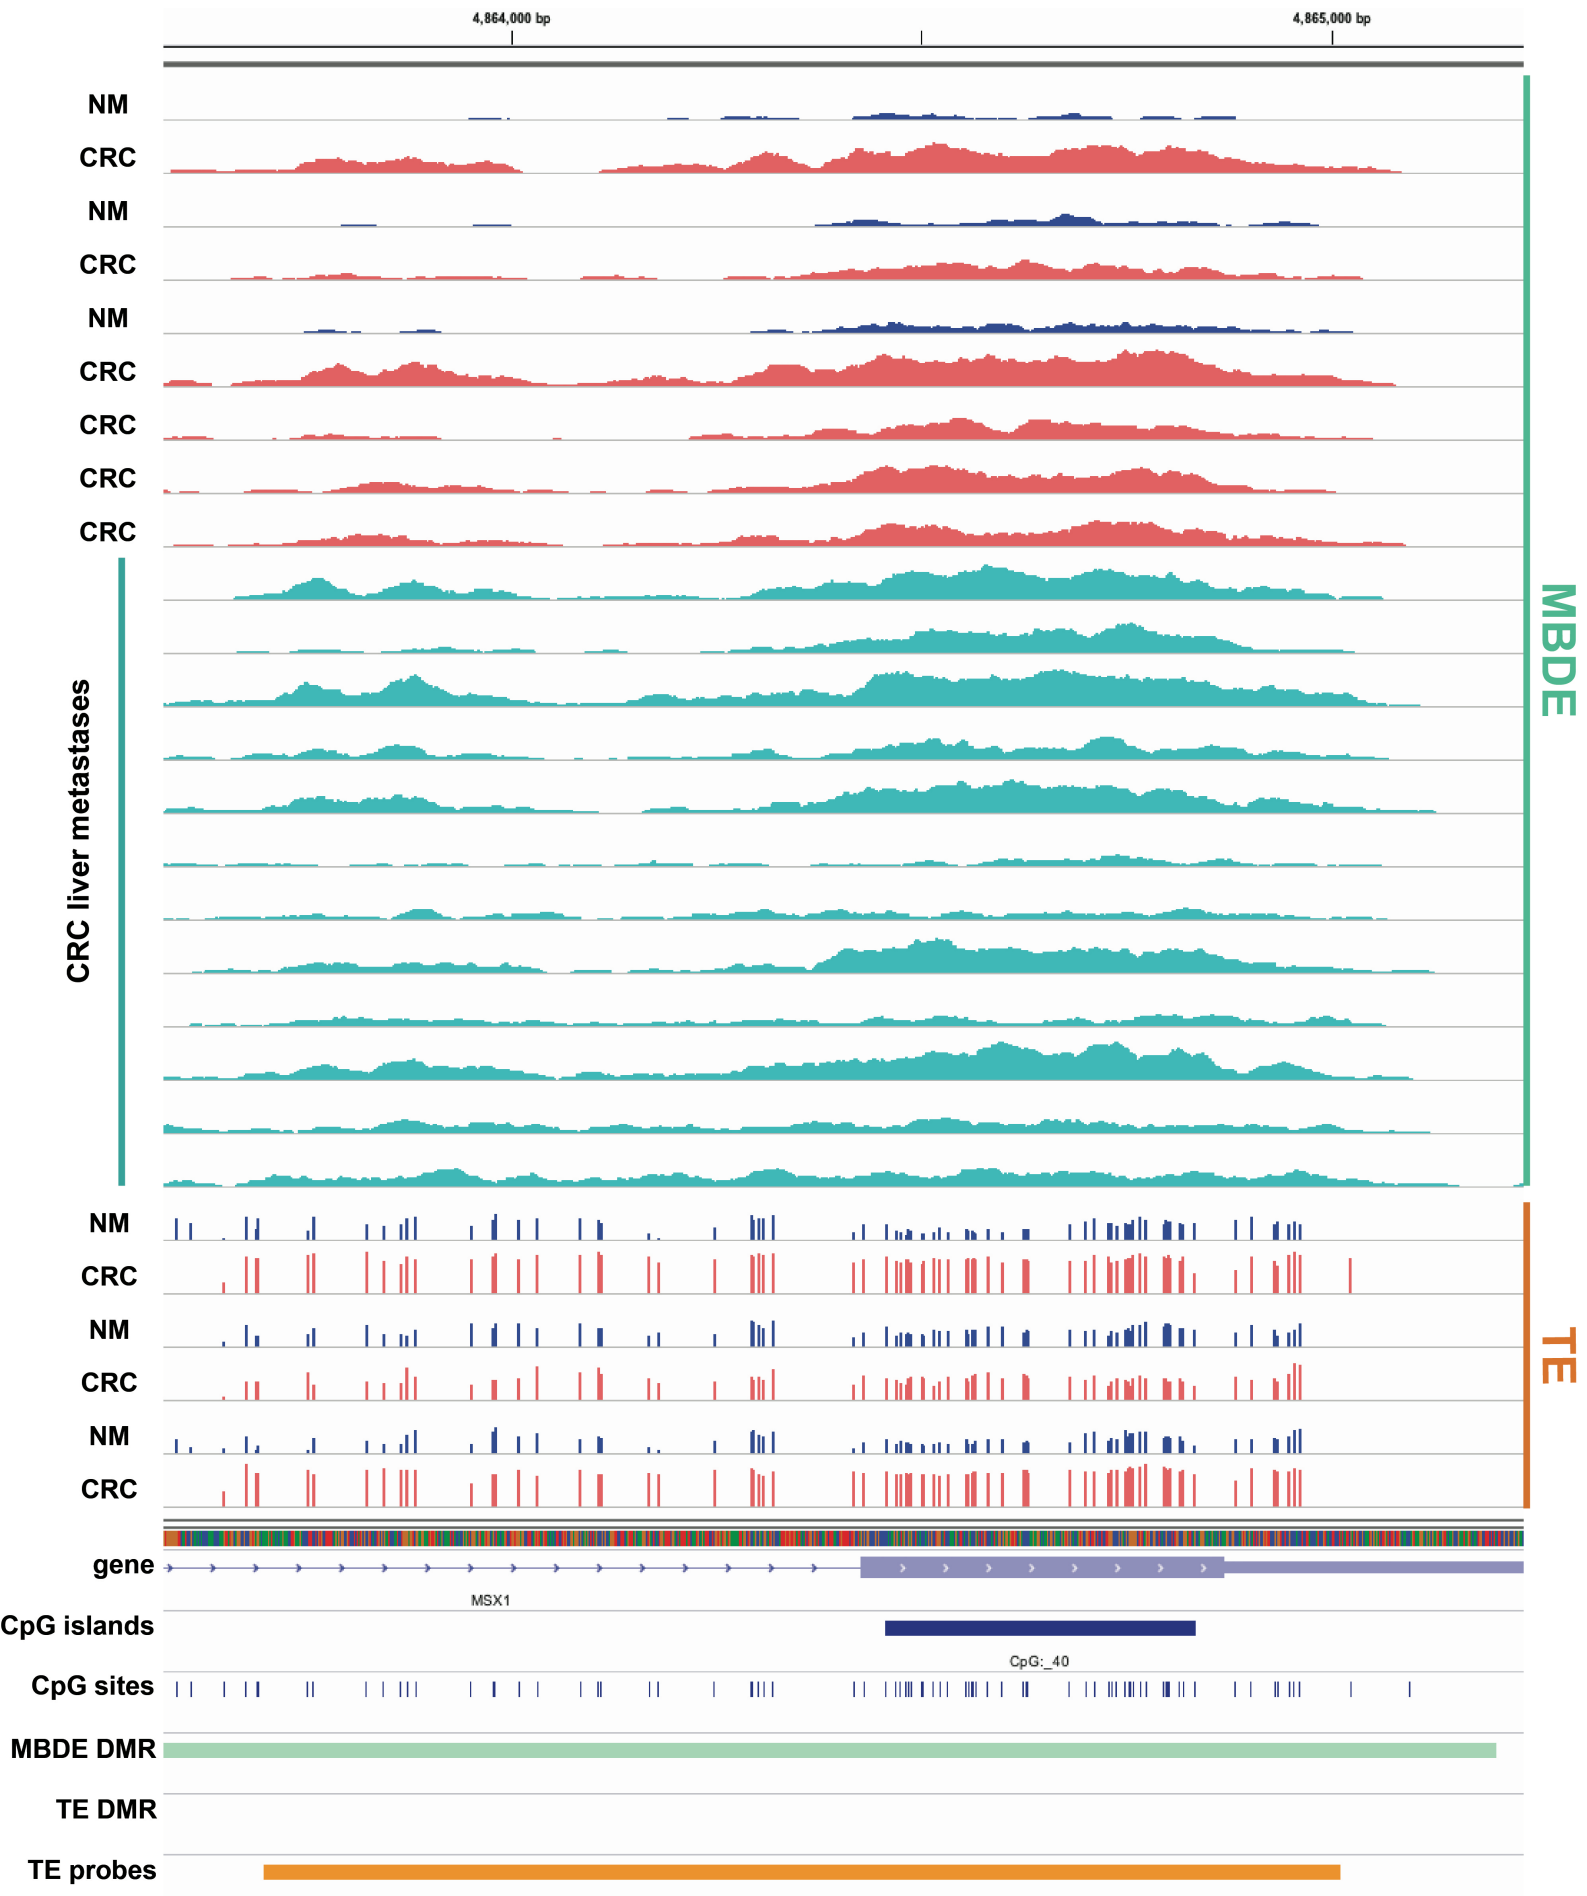

**D**

**Hypomethylated DMR (*WNT2* gene, chromosome 7)**

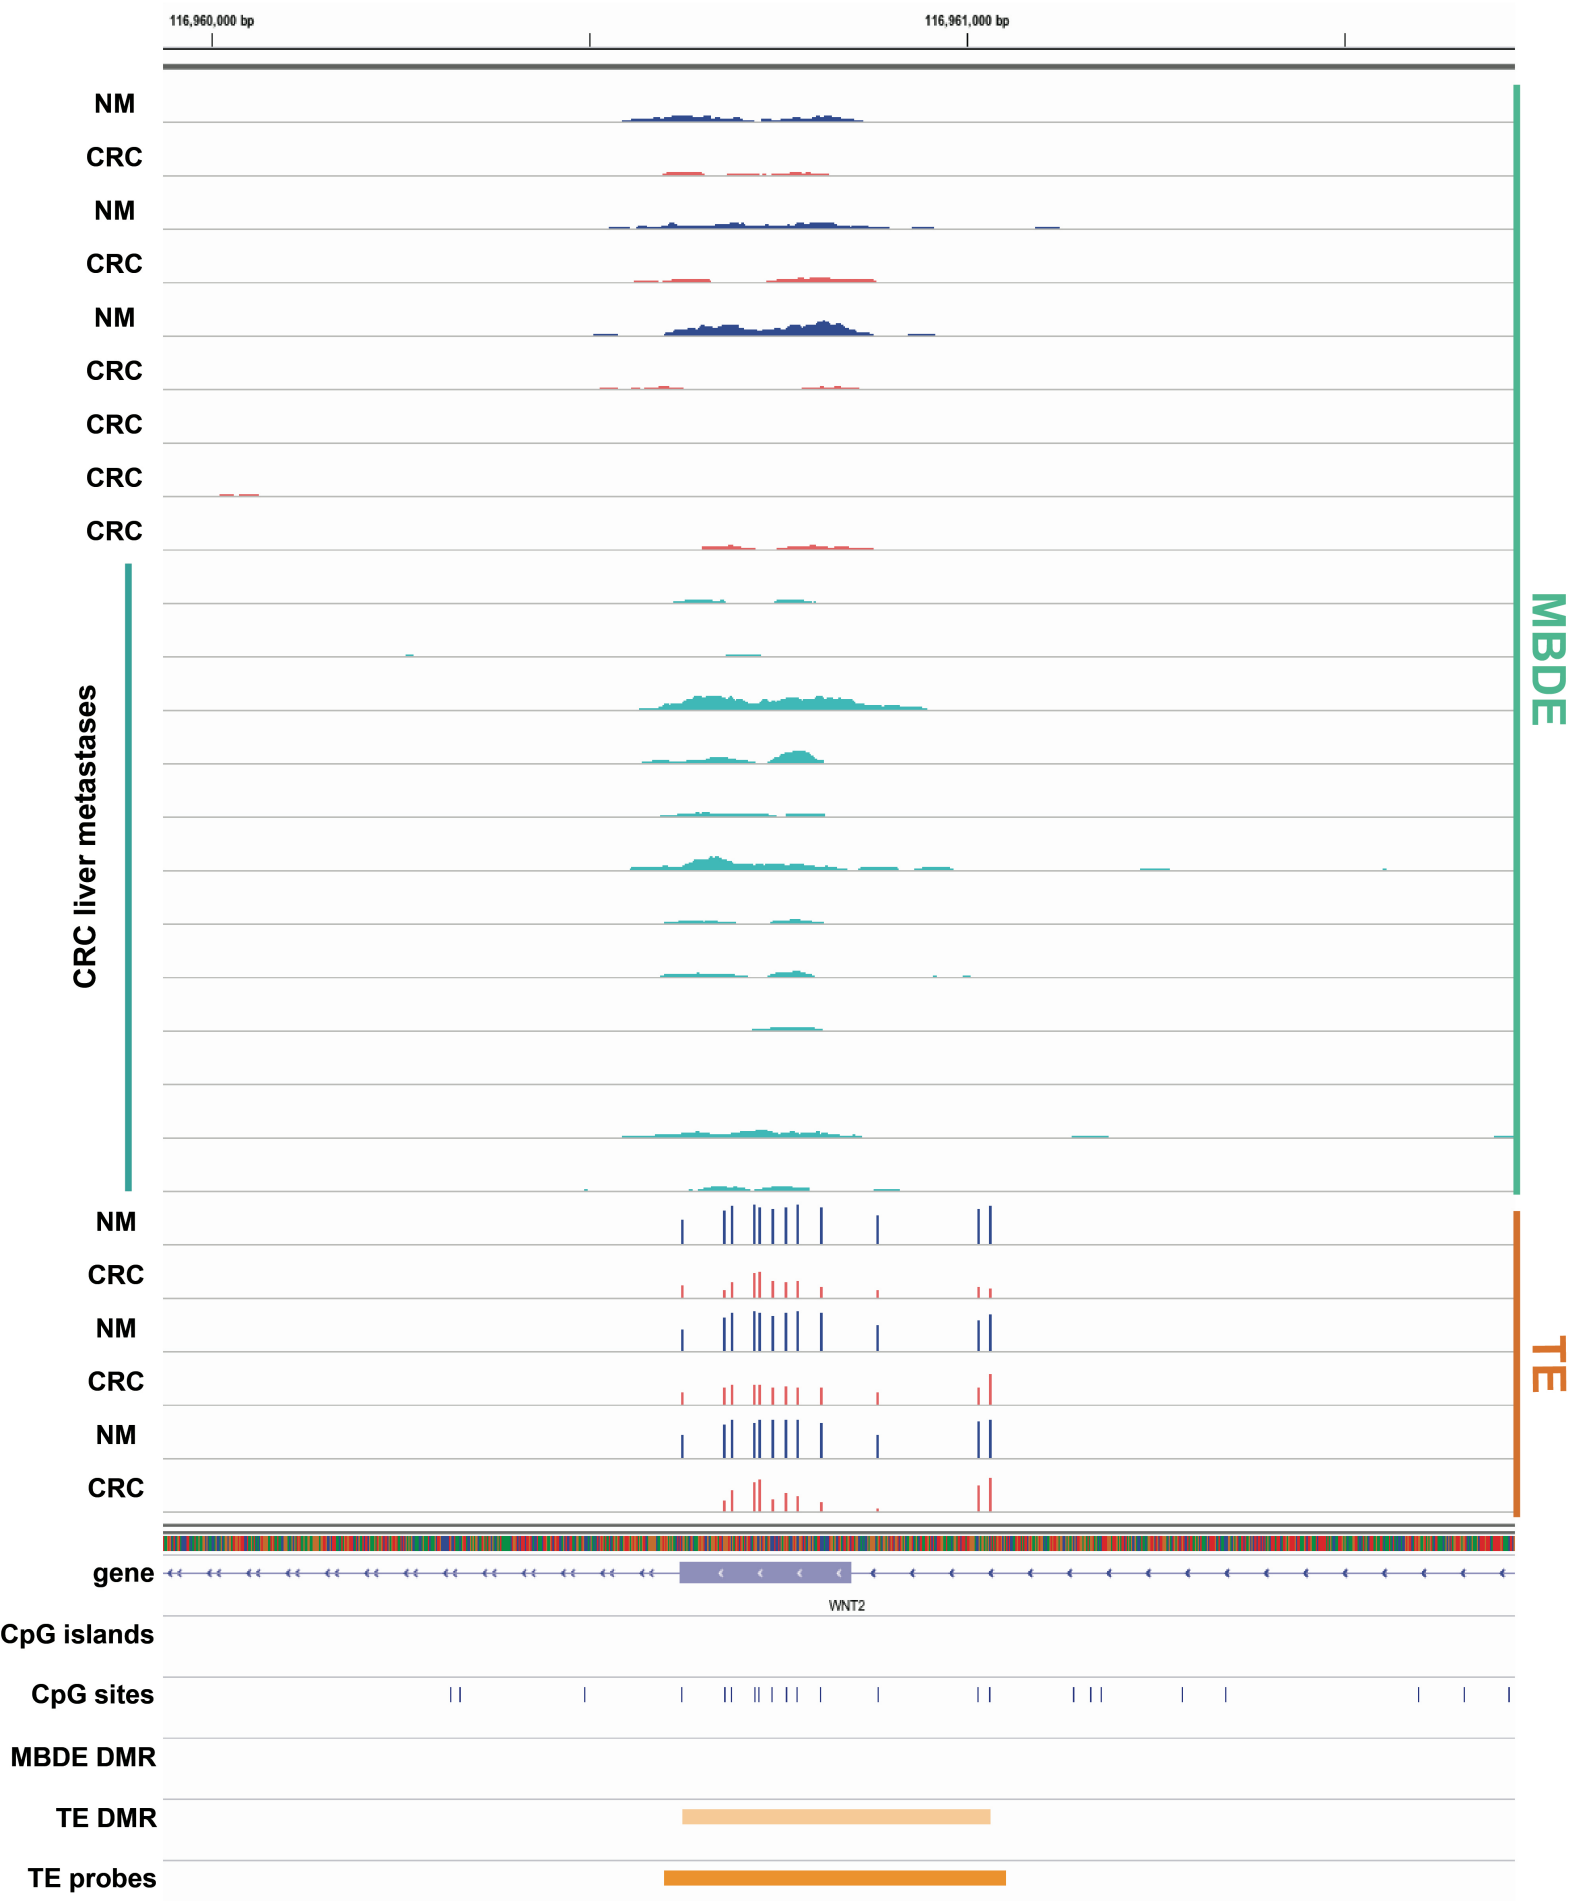

**E**

**Hypomethylated DMR (*SULF1* gene promoter, chromosome 8)**

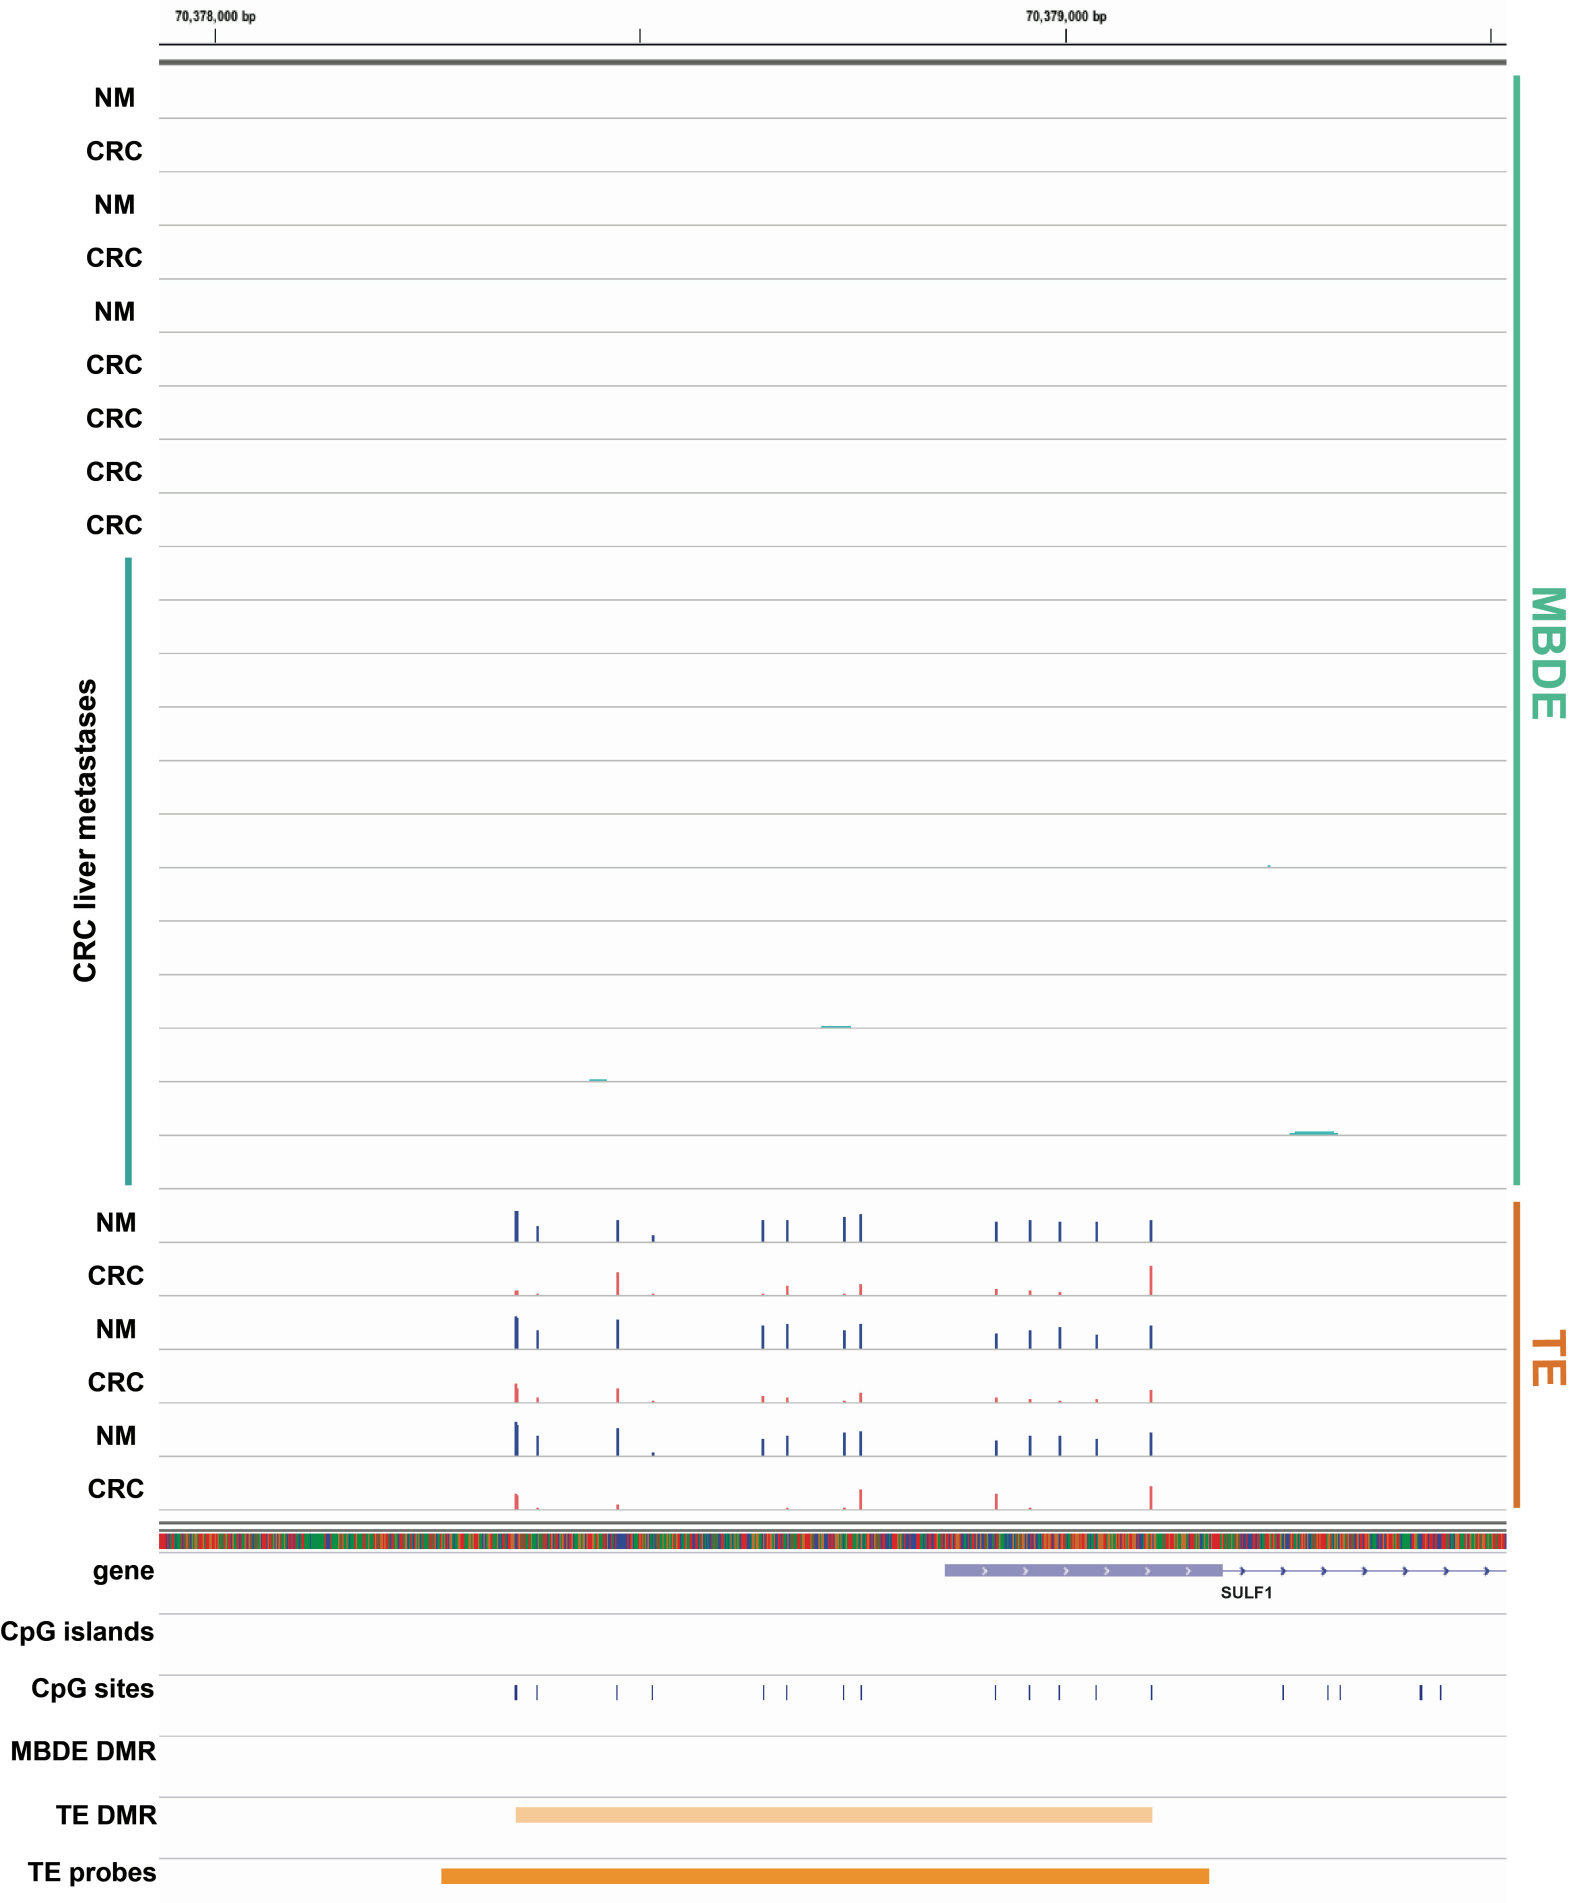

Supplement: MOESM3 [file 17870300]
