# Supplementary material for: The DNA hypermethylation phenotype of colorectal cancer liver metastases resembles that of the primary colorectal cancers
Source: BMC Cancer. 2020 Apr 6;20:290. doi: 10.1186/s12885-020-06777-6 (PMC7137338; doi:10.1186/s12885-020-06777-6)
Supplement: Supplementary file 5 — Additional file 5: Supplementary Table 1. [file 12885_2020_6777_MOESM5_ESM.xlsx]

## Sheet: MBDE_DMRs Cancer vs Normal
Supplementary Table 1: Differentially methylated regions (DMRs) identified with MBDE and TE in primary CRC and/or CRC liver metastases vs. normal colon mucosa. (Sheets 1 and 2 show results obtained with MBDE for primary and metastatic CRCs, respectively; Sheet 3 shows results obtained with TE for primary CRCs.) Lists are filtered for adjusted P-value or median P-value. Chromosome coordinates base…
MBDe DMRs in primary CRCs (versus normal colon mucosa)
Chromosome	start	end	sSISs or inter-sSISs (as in Figure 1)	Gene or extragenic (i.e. intergenic) region (as in Figure 1)	Adjusted P-Value	Direction of cancer-associated methylation change
chr11	7272521	7274540	shore:25668/island:14052/shore:25669	promoter.SYT9/CDS.SYT9/5UTR.SYT9/exon.SYT9/intron.SYT9	4.13504e-09	hyper
chr7	31375601	31376810	shore:17103/island:9351/shore:17104	intergenic.NA	4.13504e-09	hyper
chr6	133561441	133564350	shore:15634/island:8517/shore:15635/island:8518/shore:15636	promoter.EYA4/1to5kb.EYA4/5UTR.EYA4/exon.EYA4/intron.EYA4	4.13504e-09	hyper
chr7	54609421	54610530	shore:17342/island:9477/shore:17343	promoter.VSTM2A/CDS.VSTM2A/5UTR.VSTM2A/exon.VSTM2A/intron.VSTM2A	9.32594e-09	hyper
chr7	4997891	4999340	shore:16678/island:9107/shore:16679	promoter.MMD2/CDS.MMD2/5UTR.MMD2/exon.MMD2/intron.MMD2	9.32594e-09	hyper
chr2	45169151	45172520	shore:5172/island:2802/shore:5173	CDS.SIX3/5UTR.SIX3/exon.SIX3/intron.SIX3/3UTR.SIX3	9.32594e-09	hyper
chr10	15760571	15762340	shore:23435/island:12813/shore:23436	promoter.ITGA8/CDS.ITGA8/exon.ITGA8/intron.ITGA8	9.32594e-09	hyper
chr16	49872081	49873260	shore:35536/island:19459/shore:35537	intron.ZNF423	9.32594e-09	hyper
chr2	45154921	45157900	shore:5168/island:2798/shore:5169	intergenic.NA	9.77226e-09	hyper
chr7	93519091	93521190	shore:17884/island:9767/shore:17885	promoter.TFPI2/CDS.TFPI2/5UTR.TFPI2/exon.TFPI2/intron.GNGT1/intron.TFPI2	9.77226e-09	hyper
chr9	135461631	135463220	shore:22650/island:12359/shore:22651	CDS.BARHL1/exon.BARHL1/intron.BARHL1	1.01081e-08	hyper
chr7	35225071	35226970	shore:17137/island:9368/shore:17138	promoter.DPY19L2P1/1to5kb.DPY19L2P1/5UTR.DPY19L2P1/exon.DPY19L2P1/intron.DPY19L2P1	1.02024e-08	hyper
chr7	152621591	152623600	shore:18764/island:10240/shore:18765/island:10241/shore:18766	intergenic.NA	1.02024e-08	hyper
chr16	51183091	51190550	shore:35565/island:19474/shore:35566/island:19475/shore:35567	promoter.SALL1/1to5kb.SALL1/CDS.SALL1/5UTR.SALL1/exon.SALL1/intron.SALL1/intergenic.NA	1.02024e-08	hyper
chr8	68863911	68865260	shore:20002/island:10921/shore:20003	promoter.NA/promoter.PREX2/CDS.NA/CDS.PREX2/5UTR.NA/5UTR.PREX2/exon.NA/exon.PREX2/intron.PREX2/3UTR.NA	1.14628e-08	hyper
chr2	172944671	172946810	shore:6614/island:3577/shore:6615/island:3578/shore:6616	1to5kb.DLX1/CDS.METAP1D/exon.METAP1D/intron.METAP1D/3UTR.METAP1D	1.16563e-08	hyper
chr7	24322781	24325380	shore:16968/island:9268/shore:16969	promoter.NPY/1to5kb.NPY/CDS.NPY/5UTR.NPY/exon.NPY/intron.NPY	1.16563e-08	hyper
chr8	97169481	97174500	shore:20220/island:11034/shore:20221/island:11035/shore:20222/island:11036/shore:20223	promoter.GDF6/1to5kb.GDF6/CDS.GDF6/5UTR.GDF6/exon.GDF6/intron.GDF6	1.16563e-08	hyper
chr5	136833611	136835210	shore:12963/island:7046/shore:12964	promoter.SPOCK1/CDS.SPOCK1/5UTR.SPOCK1/exon.SPOCK1/intron.SPOCK1	1.16563e-08	hyper
chr2	47796621	47799590	shore:5219/island:2829/shore:5220	promoter.KCNK12/1to5kb.KCNK12/CDS.KCNK12/exon.KCNK12/intron.MSH2/intron.KCNK12	1.16563e-08	hyper
chr6	73330451	73333380	shore:15153/island:8256/shore:15154	promoter.KCNQ5/1to5kb.KCNQ5/CDS.KCNQ5/5UTR.KCNQ5/exon.KCNQ5/intron.KCNQ5	1.16563e-08	hyper
chr7	43151761	43154150	shore:17207/island:9405/shore:17208	promoter.HECW1/1to5kb.HECW1/1to5kb.NA/CDS.HECW1/5UTR.HECW1/exon.HECW1/intron.HECW1	1.16563e-08	hyper
chr9	132381651	132383590	shore:22520/island:12290/shore:22521	promoter.C9orf50/1to5kb.NTMT1/CDS.C9orf50/5UTR.C9orf50/exon.C9orf50/intron.C9orf50	1.16563e-08	hyper
chr20	34893531	34895550	shore:45349/island:25076/shore:45350	promoter.DLGAP4/5UTR.DLGAP4/exon.DLGAP4/intron.DLGAP4	1.29926e-08	hyper
chr8	72755501	72758000	shore:20023/island:10932/shore:20024	promoter.MSC-AS1/promoter.MSC/1to5kb.MSC/CDS.MSC/5UTR.MSC/exon.MSC-AS1/exon.MSC/intron.MSC-AS1/intron.MSC	1.29926e-08	hyper
chr2	54086311	54087800	shore:5249/island:2844/shore:5250	promoter.ASB3/promoter.GPR75/1to5kb.NA/CDS.ASB3/5UTR.ASB3/5UTR.GPR75/exon.ASB3/exon.GPR75/intron.ASB3/intron.GPR75	1.29926e-08	hyper
chr7	28449001	28450330	island:9328/shore:17061	1to5kb.CREB5/CDS.NA/5UTR.NA/exon.NA/intron.CREB5/intron.NA/3UTR.NA	1.29926e-08	hyper
chr5	1444131	1447180	shore:11883/island:6464/shore:11884/island:6465/shore:11885	promoter.SLC6A3/1to5kb.SLC6A3/5UTR.SLC6A3/exon.SLC6A3/intron.SLC6A3	1.4898e-08	hyper
chr2	68545581	68547430	shore:5394/island:2924/shore:5395	promoter.CNRIP1/CDS.CNRIP1/5UTR.CNRIP1/exon.CNRIP1/intron.CNRIP1	1.5044e-08	hyper
chr7	30720981	30722760	shore:17095/island:9347/shore:17096	promoter.CRHR2/CDS.CRHR2/5UTR.CRHR2/exon.CRHR2/intron.CRHR2	1.58584e-08	hyper
chr3	142837171	142841440	shore:9269/island:5010/shore:9270	promoter.CHST2/promoter.NA/1to5kb.CHST2/1to5kb.NA/CDS.CHST2/CDS.NA/5UTR.CHST2/exon.CHST2/exon.NA/intron.CHST2/3UTR.CHST2	1.70634e-08	hyper
chr8	97505441	97507890	shore:20226/island:11038/shore:20227	promoter.SDC2/CDS.SDC2/5UTR.SDC2/exon.SDC2/intron.SDC2	1.75693e-08	hyper
chr7	98466741	98468570	shore:17955/island:9806/shore:17956	promoter.TMEM130/1to5kb.TMEM130/CDS.TMEM130/5UTR.TMEM130/exon.TMEM130/intron.TMEM130	1.96011e-08	hyper
chr8	67344211	67345310	shore:19976/island:10908/shore:19977	promoter.ADHFE1/1to5kb.RRS1-AS1/CDS.ADHFE1/5UTR.ADHFE1/exon.ADHFE1/intron.ADHFE1	2.0954e-08	hyper
chr2	139536711	139539170	shore:6421/island:3473/shore:6422	promoter.NXPH2/1to5kb.NXPH2/CDS.NXPH2/exon.NXPH2/intron.NXPH2	3.4301e-08	hyper
chr2	131720521	131722610	shore:6326/island:3423/shore:6327	intron.ARHGEF4	3.4301e-08	hyper
chr12	66122531	66123660	shore:28842/island:15765/shore:28843	intergenic.NA	3.60409e-08	hyper
chr19	34111831	34114620	shore:42840/island:23638/shore:42841	promoter.CHST8/1to5kb.CHST8/5UTR.CHST8/exon.CHST8/intron.CHST8	3.66113e-08	hyper
chr4	110222711	110224620	shore:11073/island:6005/shore:11074	promoter.COL25A1/1to5kb.COL25A1/CDS.COL25A1/5UTR.COL25A1/exon.COL25A1/intron.COL25A1	3.85069e-08	hyper
chr11	128562181	128565500	shore:27635/island:15117/shore:27636	promoter.FLI1/1to5kb.FLI1/CDS.FLI1/5UTR.FLI1/exon.FLI1/exon.SENCR/intron.FLI1/intron.SENCR	3.85069e-08	hyper
chr12	117796781	117799700	shore:29374/island:16050/shore:29375	promoter.NOS1/5UTR.NOS1/exon.NOS1/intron.NOS1	3.85069e-08	hyper
chr11	111410681	111412520	shore:27324/island:14954/shore:27325	promoter.LAYN/1to5kb.LAYN/CDS.LAYN/5UTR.LAYN/exon.LAYN/intron.LAYN	3.85069e-08	hyper
chr2	945151	947500	shore:4595/island:2489/shore:4596/island:2490/shore:4597	promoter.SNTG2/1to5kb.SNTG2/CDS.SNTG2/5UTR.SNTG2/exon.SNTG2/intron.SNTG2	3.85069e-08	hyper
chr6	84417251	84419710	shore:15231/island:8297/shore:15232	promoter.SNAP91/1to5kb.SNAP91/CDS.SNAP91/5UTR.SNAP91/exon.SNAP91/intron.SNAP91	4.14304e-08	hyper
chr7	32337621	32339090	shore:17107/island:9353/shore:17108	promoter.PDE1C/CDS.PDE1C/5UTR.PDE1C/exon.PDE1C/intron.PDE1C	4.38919e-08	hyper
chr2	56150081	56151430	shore:5283/island:2861/shore:5284	promoter.EFEMP1/5UTR.EFEMP1/exon.EFEMP1/intron.EFEMP1	4.38919e-08	hyper
chr9	124987461	124989960	shore:22237/island:12141	promoter.LHX6/1to5kb.LHX6/CDS.LHX6/5UTR.LHX6/exon.LHX6/intron.LHX6	4.40247e-08	hyper
chr12	50354501	50356470	shore:28404/island:15525/shore:28405	promoter.AQP5/1to5kb.AQP6/CDS.AQP5/5UTR.AQP5/exon.AQP5/intron.AQP5	4.40247e-08	hyper
chr11	8289191	8291110	shore:25686/island:14061/shore:25687	promoter.LMO1/1to5kb.LMO1/CDS.LMO1/5UTR.LMO1/exon.LMO1/intron.LMO1	4.52741e-08	hyper
chr20	59826661	59829820	shore:45831/island:25331/shore:45832	promoter.CDH4/CDS.CDH4/5UTR.CDH4/exon.CDH4/intron.CDH4	4.52741e-08	hyper
chr8	69242491	69244900	shore:20004/island:10922/shore:20005	promoter.C8orf34/promoter.C8orf34-AS1/1to5kb.C8orf34-AS1/CDS.C8orf34/CDS.C8orf34-AS1/5UTR.C8orf34/5UTR.C8orf34-AS1/exon.C8orf34/exon.C8orf34-AS1/intron.C8orf34/intron.C8orf34-AS1	4.52741e-08	hyper
chr2	182321481	182323290	shore:6753/island:3667/shore:6754	promoter.ITGA4/CDS.ITGA4/5UTR.ITGA4/exon.ITGA4/intron.ITGA4	4.52741e-08	hyper
chr11	18812381	18814370	shore:25860/island:14153/shore:25861	promoter.PTPN5/5UTR.PTPN5/exon.PTPN5/intron.PTPN5	4.77201e-08	hyper
chr9	122130671	122132520	shore:22180/island:12111/shore:22181	promoter.BRINP1/5UTR.BRINP1/exon.BRINP1/intron.BRINP1	4.84788e-08	hyper
chr9	137533091	137534640	shore:22771/island:12426/shore:22772	promoter.COL5A1/CDS.COL5A1/5UTR.COL5A1/exon.COL5A1/intron.COL5A1	4.89575e-08	hyper
chr7	151106141	151108490	shore:18728/island:10221/shore:18729	promoter.WDR86-AS1/promoter.WDR86/1to5kb.WDR86/CDS.WDR86-AS1/CDS.WDR86/5UTR.WDR86-AS1/5UTR.WDR86/exon.WDR86-AS1/exon.WDR86/intron.WDR86-AS1/intron.WDR86	5.03406e-08	hyper
chr2	100937301	100939430	shore:5869/island:3176/shore:5870	promoter.LONRF2/CDS.LONRF2/5UTR.LONRF2/exon.LONRF2/intron.LONRF2	5.18927e-08	hyper
chr3	28616361	28618270	shore:7946/island:4311/shore:7947	promoter.LINC00693/promoter.NA/1to5kb.NA/exon.LINC00693/exon.NA/intron.LINC00693	5.38471e-08	hyper
chr2	63282171	63285400	shore:5333/island:2890/shore:5334/island:2891/shore:5335	CDS.OTX1/exon.OTX1/intron.OTX1/3UTR.OTX1/intergenic.NA	6.12202e-08	hyper
chr17	35164711	35166330	shore:37745/island:20686/shore:37746	intergenic.NA	6.12202e-08	hyper
chr2	1745551	1749130	shore:4622/island:2503/shore:4623	promoter.PXDN/CDS.PXDN/5UTR.PXDN/exon.PXDN/intron.PXDN	6.12202e-08	hyper
chr2	98962541	98964750	shore:5843/island:3163/shore:5844	promoter.CNGA3/5UTR.CNGA3/exon.CNGA3/intron.CNGA3	6.19312e-08	hyper
chr5	172670551	172673540	shore:13554/island:7379/shore:13555/island:7380/shore:13556	intergenic.NA	6.19312e-08	hyper
chr8	55369921	55372830	shore:19863/island:10845/shore:19864	promoter.SOX17/CDS.SOX17/5UTR.SOX17/exon.SOX17/intron.SOX17/3UTR.SOX17	6.7682e-08	hyper
chr7	49811731	49816010	shore:17310/island:9460/shore:17311	promoter.VWC2/1to5kb.VWC2/CDS.VWC2/5UTR.VWC2/exon.VWC2/intron.VWC2	6.7682e-08	hyper
chr7	153583111	153586560	shore:18769/island:10243/shore:18770	promoter.DPP6/1to5kb.DPP6/CDS.DPP6/5UTR.DPP6/exon.DPP6/intron.DPP6	6.98045e-08	hyper
chr8	70981431	70985260	shore:20010/island:10925/shore:20011	promoter.PRDM14/1to5kb.PRDM14/CDS.PRDM14/5UTR.PRDM14/exon.PRDM14/intron.PRDM14	6.98045e-08	hyper
chr3	129692651	129695110	shore:9074/island:4906/shore:9075	promoter.TRH/CDS.TRH/5UTR.TRH/exon.TRH/intron.TRH	8.06149e-08	hyper
chr4	142052971	142054870	shore:11294/island:6131/shore:11295	promoter.RNF150/CDS.RNF150/5UTR.RNF150/exon.RNF150/intron.RNF150	8.51471e-08	hyper
chr12	5017821	5021950	shore:27865/island:15238/shore:27866	promoter.KCNA1/promoter.NA/1to5kb.KCNA1/1to5kb.NA/CDS.KCNA1/CDS.NA/5UTR.KCNA1/exon.KCNA1/exon.NA/intron.KCNA1	8.51471e-08	hyper
chr6	41340641	41344040	shore:14847/island:8093/shore:14848	intergenic.NA	8.761e-08	hyper
chr3	192231781	192233490	shore:9678/island:5226/shore:9679	intron.FGF12	8.761e-08	hyper
chr19	30716091	30717960	shore:42774/island:23602	intergenic.NA	8.761e-08	hyper
chr3	13323171	13325240	shore:7813/island:4239/shore:7814	intergenic.NA	9.22771e-08	hyper
chr2	175594241	175595860	shore:6662/island:3607/shore:6663	exon.NA/intron.NA	9.57197e-08	hyper
chr19	15089881	15091700	shore:42227/island:23294/shore:42228	promoter.SLC1A6/1to5kb.SLC1A6/5UTR.SLC1A6/exon.SLC1A6/intron.SLC1A6	9.63695e-08	hyper
chr7	2727571	2728590	shore:16611/island:9066/shore:16612	promoter.AMZ1/5UTR.AMZ1/exon.AMZ1/intron.AMZ1	9.63695e-08	hyper
chr10	57389581	57391540	shore:23900/island:13056/shore:23901	1to5kb.PCDH15	1.06999e-07	hyper
chr7	19155761	19159070	shore:16898/island:9231/shore:16899	promoter.TWIST1/promoter.NA/1to5kb.TWIST1/1to5kb.NA/CDS.TWIST1/CDS.NA/5UTR.TWIST1/exon.TWIST1/exon.NA/intron.TWIST1/3UTR.TWIST1	1.10871e-07	hyper
chr6	72129151	72131110	shore:15144/island:8251/shore:15145	promoter.LINC00472/exon.LINC00472/intron.LINC00472	1.10871e-07	hyper
chr4	96468751	96471340	shore:10996/island:5963/shore:10997/island:5964/shore:10998	promoter.UNC5C/CDS.UNC5C/5UTR.UNC5C/exon.UNC5C/intron.UNC5C	1.1417e-07	hyper
chr3	134369161	134370410	shore:9143/island:4942/shore:9144	promoter.KY/CDS.KY/5UTR.KY/exon.KY/intron.KY	1.18208e-07	hyper
chr21	38078711	38083480	shore:46426/island:25676/shore:46427	CDS.SIM2/exon.SIM2/intron.SIM2/3UTR.SIM2	1.29787e-07	hyper
chr10	23460991	23464220	shore:23503/island:12850/shore:23504/island:12851/shore:23505	intergenic.NA	1.29787e-07	hyper
chr2	154727571	154730200	shore:6477/island:3501/shore:6478/island:3502/shore:6479/island:3503/shore:6480	promoter.GALNT13/5UTR.GALNT13/exon.GALNT13/intron.GALNT13	1.29787e-07	hyper
chr2	105479631	105481040	shore:5910/island:3197/shore:5911	intergenic.NA	1.34816e-07	hyper
chr7	19145661	19147990	shore:16894/island:9228/shore:16895/island:9229/shore:16896	intergenic.NA	1.34816e-07	hyper
chr10	108923531	108925100	shore:24672/island:13477/shore:24673	promoter.SORCS1/CDS.SORCS1/5UTR.SORCS1/exon.SORCS1/intron.SORCS1	1.34816e-07	hyper
chr2	233350001	233353230	shore:7287/island:3953/shore:7288	promoter.ECEL1/1to5kb.ECEL1/CDS.ECEL1/5UTR.ECEL1/exon.ECEL1/intron.ECEL1	1.38587e-07	hyper
chr11	91957351	91960650	shore:27192/island:14886/shore:27193	intergenic.NA	1.50457e-07	hyper
chr16	22824351	22826750	shore:35018/island:19183/shore:35019	promoter.HS3ST2/1to5kb.HS3ST2/CDS.HS3ST2/5UTR.HS3ST2/exon.HS3ST2/intron.HS3ST2	1.67203e-07	hyper
chr12	113900561	113902640	shore:29306/island:16007	CDS.LHX5/exon.LHX5/intron.LHX5/3UTR.LHX5/intergenic.NA	1.67203e-07	hyper
chr1	200009651	200011750	shore:3723/island:2023/shore:3724/island:2024/shore:3725/island:2025	promoter.NR5A2/1to5kb.NR5A2/intron.NR5A2	1.69955e-07	hyper
chr8	145103091	145108610	shore:20788/island:11353/shore:20789	CDS.OPLAH/exon.OPLAH/intron.OPLAH/3UTR.OPLAH/intergenic.NA	1.69955e-07	hyper
chr10	7449081	7455540	shore:23346/island:12765/shore:23347	promoter.SFMBT2/1to5kb.SFMBT2/5UTR.SFMBT2/exon.SFMBT2/intron.SFMBT2	1.75646e-07	hyper
chr7	31091451	31093390	shore:17099/island:9349/shore:17100	promoter.ADCYAP1R1/5UTR.ADCYAP1R1/exon.ADCYAP1R1/intron.ADCYAP1R1	1.75646e-07	hyper
chr20	23027851	23032460	shore:45114/island:24948/shore:45115	promoter.THBD/promoter.NA/1to5kb.THBD/1to5kb.NA/CDS.THBD/CDS.NA/5UTR.THBD/5UTR.NA/exon.THBD/exon.NA/intron.NA/3UTR.THBD	1.77076e-07	hyper
chr5	16178781	16180970	shore:12066/island:6565/shore:12067	promoter.NA/promoter.MARCH11/1to5kb.NA/1to5kb.MARCH11/CDS.MARCH11/5UTR.MARCH11/exon.NA/exon.MARCH11/intron.NA/intron.MARCH11	1.77076e-07	hyper
chr9	133534271	133540750	shore:22570/island:12317	promoter.PRDM12/1to5kb.PRDM12/CDS.PRDM12/5UTR.PRDM12/exon.PRDM12/intron.PRDM12/intergenic.NA	1.77345e-07	hyper
chr8	53850961	53854680	shore:19843/island:10834/shore:19844	promoter.NPBWR1/1to5kb.NPBWR1/CDS.NPBWR1/exon.NPBWR1/intergenic.NA	1.79855e-07	hyper
chr2	45230851	45232830	shore:5179/island:2807/shore:5180/island:2808/shore:5181	exon.SIX2/3UTR.SIX2/intergenic.NA	1.79855e-07	hyper
chr5	178015851	178018200	shore:13746/island:7483/shore:13747	promoter.COL23A1/CDS.COL23A1/5UTR.COL23A1/exon.COL23A1/intron.COL23A1	1.79855e-07	hyper
chr7	157480931	157487000	island:10332/shore:18921	intron.PTPRN2	1.79855e-07	hyper
chr7	38670101	38671990	shore:17171/island:9387/shore:17172	promoter.AMPH/CDS.AMPH/5UTR.AMPH/exon.AMPH/intron.AMPH	1.81317e-07	hyper
chr3	33259491	33261060	shore:7982/island:4330/shore:7983	promoter.SUSD5/CDS.SUSD5/5UTR.SUSD5/exon.SUSD5/intron.SUSD5	1.82139e-07	hyper
chr9	37025191	37029040	shore:21325/island:11653/shore:21326/island:11654/shore:21327	promoter.PAX5/1to5kb.PAX5/CDS.PAX5/exon.PAX5/intron.PAX5	1.88268e-07	hyper
chr1	50885911	50887560	island:1102	promoter.DMRTA2/CDS.DMRTA2/5UTR.DMRTA2/exon.DMRTA2/intron.DMRTA2	2.12392e-07	hyper
chr10	134755391	134757160	shore:25118/island:13721/shore:25119	promoter.CFAP46/1to5kb.CFAP46/CDS.CFAP46/5UTR.CFAP46/exon.CFAP46/intron.CFAP46	2.21579e-07	hyper
chr17	37380651	37382470	shore:37837/island:20738/shore:37838	promoter.STAC2/CDS.STAC2/5UTR.STAC2/exon.STAC2/intron.STAC2	2.28436e-07	hyper
chr10	125425171	125426910	shore:24869/island:13582/shore:24870	promoter.GPR26/CDS.GPR26/5UTR.GPR26/exon.GPR26/intron.GPR26	2.28636e-07	hyper
chr11	31824881	31828230	shore:25936/island:14196/shore:25937/island:14197/shore:25938	promoter.PAX6/1to5kb.PAX6/CDS.PAX6/5UTR.PAX6/exon.PAX6/intron.PAX6	2.34645e-07	hyper
chr4	156679801	156681680	shore:11421/island:6199/shore:11422	promoter.GUCY1B1/CDS.GUCY1B1/5UTR.GUCY1B1/exon.GUCY1B1/intron.GUCY1B1	2.34645e-07	hyper
chr7	327891	331660	shore:16251/island:8848/shore:16252	promoter.WI2-2373I1.2/1to5kb.WI2-2373I1.2/CDS.WI2-2373I1.2/exon.WI2-2373I1.2/intron.WI2-2373I1.2/intergenic.NA	2.46221e-07	hyper
chr7	158936211	158938790	shore:19044/island:10401/shore:19045	promoter.VIPR2/1to5kb.VIPR2/CDS.VIPR2/5UTR.VIPR2/exon.VIPR2/intron.VIPR2	2.50237e-07	hyper
chr3	192125511	192128310	shore:9676/island:5225/shore:9677	promoter.FGF12/1to5kb.FGF12/CDS.FGF12/5UTR.FGF12/exon.FGF12/intron.FGF12	2.84995e-07	hyper
chr22	48884621	48887680	shore:47993/island:26513/shore:47994	promoter.FAM19A5/CDS.FAM19A5/5UTR.FAM19A5/exon.FAM19A5/intron.FAM19A5	2.84995e-07	hyper
chr10	83633551	83636040	shore:24201/island:13211/shore:24202	promoter.NRG3/1to5kb.NRG3/CDS.NRG3/5UTR.NRG3/exon.NRG3/intron.NRG3	2.85562e-07	hyper
chr1	165322921	165326600	shore:3458/island:1884/shore:3459/island:1885/shore:3460	promoter.LMX1A/1to5kb.LMX1A/CDS.LMX1A/5UTR.LMX1A/exon.LMX1A/intron.LMX1A	2.90487e-07	hyper
chr7	32109631	32111250	shore:17105/island:9352/shore:17106	promoter.PDE1C/CDS.PDE1C/5UTR.PDE1C/exon.PDE1C/intron.PDE1C	2.90487e-07	hyper
chr2	105458811	105462080	shore:5905/island:3194/shore:5906	intron.PANTR1	2.9669e-07	hyper
chr11	20690281	20693010	shore:25884/island:14167/shore:25885	promoter.NELL1/CDS.NELL1/5UTR.NELL1/exon.NELL1/intron.NELL1	3.1488e-07	hyper
chr1	11539641	11540870	island:430/shore:735	intron.DISP3	3.17508e-07	hyper
chr1	44872011	44875030	island:1024/shore:1860	intron.RNF220	3.32231e-07	hyper
chr3	48697341	48700380	shore:8257/island:4475	promoter.CELSR3/CDS.CELSR3/5UTR.CELSR3/exon.CELSR3/intron.CELSR3	3.35035e-07	hyper
chr7	127668651	127673470	shelf:15876/shore:18331/island:10005/shore:18332	promoter.LRRC4/promoter.NA/1to5kb.LRRC4/1to5kb.NA/CDS.LRRC4/CDS.NA/5UTR.LRRC4/exon.LRRC4/exon.NA/intron.SND1/intron.LRRC4/3UTR.LRRC4	3.46045e-07	hyper
chr5	76505701	76507480	shore:12490/island:6792/shore:12491	promoter.PDE8B/1to5kb.PDE8B/CDS.PDE8B/5UTR.PDE8B/exon.PDE8B/intron.PDE8B	3.46045e-07	hyper
chr12	99287911	99289670	shore:29045/island:15869/shore:29046	promoter.ANKS1B/5UTR.ANKS1B/exon.ANKS1B/intron.ANKS1B	3.46045e-07	hyper
chr9	116421	118870	shore:20935/island:11445/shore:20936	promoter.FOXD4/CDS.FOXD4/5UTR.FOXD4/exon.FOXD4/3UTR.FOXD4	3.46045e-07	hyper
chr1	200003431	200006180	shore:3721/island:2021/shore:3722	1to5kb.NR5A2/intron.NR5A2	3.48134e-07	hyper
chr6	62995261	62996680	shore:15114/island:8236/shore:15115	promoter.KHDRBS2/CDS.KHDRBS2/5UTR.KHDRBS2/exon.KHDRBS2/intron.KHDRBS2	3.60875e-07	hyper
chr7	1285771	1287830	shore:16431/island:8962/shore:16432	intergenic.NA	3.60875e-07	hyper
chr2	233283661	233287350	island:3951/shore:7284	intergenic.NA	3.62729e-07	hyper
chr1	14924401	14926350	shore:800/island:465/shore:801	promoter.KAZN/CDS.KAZN/5UTR.KAZN/exon.KAZN/intron.KAZN	3.63662e-07	hyper
chr1	114694681	114698000	shore:2683/island:1459/shore:2684/island:1460/shore:2685	promoter.SYT6/1to5kb.SYT6/5UTR.SYT6/exon.SYT6/intron.SYT6	3.75163e-07	hyper
chr16	54965171	54968080	island:19490/shore:35593	promoter.IRX5/1to5kb.CRNDE/CDS.IRX5/5UTR.IRX5/exon.IRX5/intron.IRX5/3UTR.IRX5	3.75405e-07	hyper
chr1	54203151	54204800	shore:2077/island:1140	1to5kb.GLIS1	3.80007e-07	hyper
chr16	25702651	25704900	shore:35067/island:19208/shore:35068	promoter.HS3ST4/CDS.HS3ST4/5UTR.HS3ST4/exon.HS3ST4/intron.HS3ST4	3.80007e-07	hyper
chr21	38067891	38070740	shore:46424/island:25674	1to5kb.SIM2	3.81203e-07	hyper
chr13	110958551	110961330	shore:30737/island:16802/shore:30738/island:16803/shore:30739	promoter.COL4A2/promoter.COL4A1/1to5kb.COL4A2/1to5kb.COL4A1/CDS.COL4A2/CDS.COL4A1/5UTR.COL4A2/5UTR.COL4A1/exon.COL4A2/exon.COL4A1/intron.COL4A2/intron.COL4A1	3.81203e-07	hyper
chr17	56234001	56235250	shore:38541/island:21128/shore:38542	promoter.MSX2P1/exon.MSX2P1	3.81203e-07	hyper
chr20	55499301	55501410	shore:45731/island:25277/shore:45732	intergenic.NA	3.83198e-07	hyper
chr4	42152471	42155270	shore:10614/island:5763/shore:10615	promoter.BEND4/CDS.BEND4/5UTR.BEND4/exon.BEND4/intron.BEND4	4.11602e-07	hyper
chr10	94833921	94835580	island:13277/shore:24323	CDS.CYP26A1/5UTR.CYP26A1/exon.CYP26A1/intron.CYP26A1	4.18124e-07	hyper
chr1	179711371	179714310	shore:3606/island:1960/shore:3607	promoter.FAM163A/5UTR.FAM163A/exon.FAM163A/intron.FAM163A	4.4101e-07	hyper
chr7	35296651	35299140	shore:17140/island:9370/shore:17141	1to5kb.TBX20/intergenic.NA	4.47102e-07	hyper
chr8	54788971	54790910	shore:19853/island:10839/shore:19854	1to5kb.RGS20/intron.RGS20	4.52528e-07	hyper
chr4	154680291	154681620	shore:11393/island:6183/shore:11394	promoter.RNF175/CDS.RNF175/5UTR.RNF175/exon.RNF175/intron.RNF175	4.65382e-07	hyper
chr5	178770441	178773060	shore:13780/island:7502/shore:13781	promoter.ADAMTS2/CDS.ADAMTS2/5UTR.ADAMTS2/exon.ADAMTS2/intron.ADAMTS2	4.71939e-07	hyper
chr1	37498131	37501140	shore:1609/island:892/shore:1610	promoter.GRIK3/1to5kb.GRIK3/CDS.GRIK3/5UTR.GRIK3/exon.GRIK3/intron.GRIK3	5.05208e-07	hyper
chr19	1464411	1468780	shore:40801/island:22430	CDS.APC2/exon.APC2/intron.APC2/intron.C19orf25	5.10548e-07	hyper
chr15	83775601	83777430	shore:33702/island:18404/shore:33703	promoter.TM6SF1/CDS.TM6SF1/5UTR.TM6SF1/exon.TM6SF1/intron.TM6SF1	5.10548e-07	hyper
chr16	55688921	55691210	shore:35608/island:19500/shore:35609	promoter.SLC6A2/1to5kb.SLC6A2/CDS.SLC6A2/5UTR.SLC6A2/exon.SLC6A2/intron.SLC6A2	5.10684e-07	hyper
chr21	38076391	38078550	shore:46425/island:25675/shore:46426	intron.SIM2	5.16162e-07	hyper
chr4	174458881	174460290	shore:11521/island:6253/shore:11522	exon.HAND2-AS1/intron.HAND2-AS1	5.20569e-07	hyper
chr17	72352601	72354170	shore:38811/island:21277/shore:38812	CDS.BTBD17/exon.BTBD17/intron.BTBD17/3UTR.BTBD17	5.25184e-07	hyper
chr2	31360021	31361950	shore:5041/island:2731/shore:5042	promoter.GALNT14/CDS.GALNT14/5UTR.GALNT14/exon.GALNT14/intron.GALNT14	5.29955e-07	hyper
chr14	107252771	107253560	inter:13319	intron.NA	5.32843e-07	hypo
chr10	131760911	131772040	shore:24974/island:13638/shore:24975	promoter.EBF3/1to5kb.EBF3/CDS.EBF3/5UTR.EBF3/exon.EBF3/intron.EBF3/3UTR.EBF3/intergenic.NA	5.32843e-07	hyper
chr7	155241041	155244540	shore:18800/island:10260/shore:18801/island:10261/shore:18802	intergenic.NA	5.34194e-07	hyper
chr2	239754821	239758690	shore:7428/island:4027/shore:7429	promoter.TWIST2/1to5kb.TWIST2/CDS.TWIST2/5UTR.TWIST2/exon.TWIST2/intron.TWIST2/3UTR.TWIST2	5.6775e-07	hyper
chr13	37247391	37249670	shore:30314/island:16572/shore:30315	promoter.SERTM1/5UTR.SERTM1/exon.SERTM1/intron.SERTM1	5.69493e-07	hyper
chr10	101088631	101090910	shore:24424/island:13329/shore:24425	promoter.CNNM1/CDS.CNNM1/5UTR.CNNM1/exon.CNNM1/intron.CNNM1	5.71041e-07	hyper
chr1	99469301	99471210	shore:2484/island:1356/shore:2485	promoter.LOC100129620/promoter.PLPPR5/CDS.PLPPR5/5UTR.PLPPR5/exon.LOC100129620/exon.PLPPR5/intron.LOC100129620/intron.PLPPR5	5.90389e-07	hyper
chr10	7708201	7710210	inter:9584	promoter.ITIH5/1to5kb.ITIH5/CDS.ITIH5/5UTR.ITIH5/exon.ITIH5/intron.ITIH5	5.90389e-07	hyper
chr1	234040001	234041990	shore:4343/island:2356/shore:4344	promoter.SLC35F3/CDS.SLC35F3/5UTR.SLC35F3/exon.SLC35F3/intron.SLC35F3	5.90389e-07	hyper
chr9	100609851	100611830	shore:21938/island:11978/shore:21939	1to5kb.FOXE1/intergenic.NA	5.90389e-07	hyper
chr14	57260611	57262400	shore:31541/island:17255/shore:31542	intergenic.NA	5.91559e-07	hyper
chr7	157474741	157479260	shelf:16371/shore:18920/island:10332	CDS.PTPRN2/exon.PTPRN2/intron.PTPRN2	5.91864e-07	hyper
chr3	179754161	179755570	shore:9505/island:5135/shore:9506	promoter.PEX5L/CDS.PEX5L/5UTR.PEX5L/exon.PEX5L/intron.PEX5L	5.93179e-07	hyper
chr6	27533701	27534620	inter:5954	intergenic.NA	5.96033e-07	hyper
chr13	113760831	113765940	shore:30927/island:16911/shore:30928	CDS.F7/exon.F7/intron.F7	6.07883e-07	hyper
chr4	62065561	62069110	shore:10755/island:5837/shore:10756	promoter.ADGRL3/1to5kb.ADGRL3/5UTR.ADGRL3/exon.ADGRL3/intron.ADGRL3	6.27921e-07	hyper
chr7	103968501	103970290	shore:18188/island:9930/shore:18189	promoter.LHFPL3/promoter.NA/1to5kb.NA/CDS.LHFPL3/5UTR.LHFPL3/exon.LHFPL3/exon.NA/intron.LHFPL3	6.34642e-07	hyper
chr1	231296281	231300040	shore:4314/island:2341/shore:4315/island:2342/shore:4316	promoter.TRIM67/1to5kb.TRIM67/CDS.TRIM67/5UTR.TRIM67/exon.TRIM67/intron.TRIM67	6.3934e-07	hyper
chr4	157996871	157998010	shore:11427/island:6202/shore:11428	promoter.GLRB/5UTR.GLRB/exon.GLRB/intron.GLRB	6.3934e-07	hyper
chr11	44337271	44338720	shore:26043/island:14258	intergenic.NA	6.41409e-07	hyper
chr1	208132011	208133450	shore:3925/island:2127/shore:3926	intergenic.NA	6.45715e-07	hyper
chr4	111552771	111555810	shore:11100/island:6021/shore:11101/island:6022/shore:11102	CDS.PITX2/5UTR.PITX2/exon.PITX2/intron.PITX2	7.10268e-07	hyper
chr17	32905741	32909430	shore:37657/island:20638/shore:37658/island:20639/shore:37659	promoter.TMEM132E/promoter.C17orf102/1to5kb.TMEM132E/1to5kb.C17orf102/CDS.TMEM132E/CDS.C17orf102/5UTR.TMEM132E/5UTR.C17orf102/exon.TMEM132E/exon.C17orf102/intron.TMEM132E/intron.C17orf102	7.10268e-07	hyper
chr6	84562531	84564160	shore:15233/island:8298/shore:15234	promoter.RIPPLY2/CDS.RIPPLY2/5UTR.RIPPLY2/exon.RIPPLY2/intron.RIPPLY2	7.15432e-07	hyper
chr2	45395721	45398490	shore:5184/island:2811/shore:5185	intergenic.NA	7.22496e-07	hyper
chr4	20253231	20257160	shore:10469/island:5683/shore:10470	promoter.SLIT2/1to5kb.SLIT2/CDS.SLIT2/5UTR.SLIT2/exon.SLIT2/intron.SLIT2	7.47328e-07	hyper
chr7	137530851	137532820	shore:18473/island:10081/shore:18474	promoter.DGKI/1to5kb.DGKI/CDS.DGKI/5UTR.DGKI/exon.DGKI/intron.DGKI	7.48425e-07	hyper
chr17	62773761	62776360	shore:38698/island:21215	CDS.ARHGAP27P1/exon.ARHGAP27P1/exon.PLEKHM1P1/intron.ARHGAP27P1/intron.PLEKHM1P1/3UTR.ARHGAP27P1	7.48729e-07	hyper
chr8	97156431	97158390	shore:20218/island:11033/shore:20219	CDS.GDF6/exon.GDF6/intron.GDF6/3UTR.GDF6	7.5105e-07	hyper
chr2	30142291	30144880	shore:5033/island:2727/shore:5034	promoter.ALK/CDS.ALK/5UTR.ALK/exon.ALK/intron.ALK	7.52319e-07	hyper
chr3	32858081	32861910	shore:7974/island:4325/shore:7975/island:4326/shore:7976	promoter.TRIM71/1to5kb.TRIM71/CDS.TRIM71/5UTR.TRIM71/exon.TRIM71/intron.TRIM71	7.54818e-07	hyper
chr1	98510011	98512110	shore:2478/island:1353/shore:2479	promoter.MIR137HG/promoter.MIR2682/promoter.MIR137/1to5kb.MIR2682/exon.MIR137HG/exon.MIR2682/exon.MIR137/intron.MIR137HG	7.94052e-07	hyper
chr10	13932601	13934490	shore:23412/island:12801/shore:23413	intron.FRMD4A	7.97752e-07	hyper
chr7	22589081	22590170	shore:16930/island:9248/shore:16931	intergenic.NA	8.00927e-07	hyper
chr5	180075411	180077240	shore:13851/island:7541/shore:13852	promoter.FLT4/CDS.FLT4/5UTR.FLT4/exon.FLT4/intron.FLT4	8.29977e-07	hyper
chr2	38300441	38303510	shore:5093/island:2758	promoter.CYP1B1/CDS.CYP1B1/5UTR.CYP1B1/exon.CYP1B1/intron.CYP1B1	8.42553e-07	hyper
chr10	125731891	125733140	shore:24875/island:13585/shore:24876	intergenic.NA	8.42553e-07	hyper
chr8	55378611	55380480	shore:19865/island:10846/shore:19866	intergenic.NA	8.56521e-07	hyper
chr5	1874981	1880230	island:6493/shore:11933/island:6494/shore:11934	CDS.IRX4/5UTR.IRX4/exon.IRX4/intron.IRX4/3UTR.IRX4/intergenic.NA	8.82085e-07	hyper
chr1	49241781	49243030	shore:1991/island:1093/shore:1992	promoter.BEND5/CDS.BEND5/5UTR.BEND5/exon.BEND5/intron.AGBL4/intron.BEND5	9.11129e-07	hyper
chr5	1929961	1932230	shore:11936/island:6496/shore:11937	intergenic.NA	9.12735e-07	hyper
chr20	61635911	61640160	shore:45987/island:25422/shore:45988	promoter.LINC01749/promoter.BHLHE23/1to5kb.LINC01749/1to5kb.BHLHE23/CDS.BHLHE23/5UTR.BHLHE23/exon.BHLHE23/3UTR.BHLHE23	9.18095e-07	hyper
chr6	390381	394130	shore:13910/island:7575/shore:13911	promoter.IRF4/1to5kb.IRF4/CDS.IRF4/5UTR.IRF4/exon.IRF4/intron.IRF4	9.25227e-07	hyper
chr3	58572131	58573190	shore:8534/island:4626/shore:8535	promoter.FAM107A/CDS.FAM107A/5UTR.FAM107A/exon.FAM107A/intron.FAM107A	9.46055e-07	hyper
chr12	72665091	72668300	shore:28898/island:15793/shore:28899	promoter.TRHDE/promoter.TRHDE-AS1/promoter.NA/1to5kb.TRHDE/1to5kb.TRHDE-AS1/1to5kb.NA/CDS.TRHDE/CDS.TRHDE-AS1/5UTR.TRHDE/5UTR.TRHDE-AS1/exon.TRHDE/exon.TRHDE-AS1/exon.NA/intron.TRHDE/intron.TRHDE-AS1/3UTR.TRHDE-AS1	9.53426e-07	hyper
chr9	100613601	100618050	shore:21939/island:11979/shore:21940/island:11980/shore:21941	promoter.FOXE1/1to5kb.FOXE1/CDS.FOXE1/5UTR.FOXE1/exon.FOXE1/3UTR.FOXE1	9.63726e-07	hyper
chr5	45694761	45696850	shore:12233/island:6654/shore:12234	promoter.HCN1/CDS.HCN1/5UTR.HCN1/exon.HCN1/intron.HCN1	9.79252e-07	hyper
chr8	77592931	77595710	shore:20061/island:10952/shore:20062	promoter.ZFHX4/promoter.ZFHX4-AS1/5UTR.ZFHX4/exon.ZFHX4/exon.ZFHX4-AS1/intron.ZFHX4/intron.ZFHX4-AS1	9.7948e-07	hyper
chr17	77720821	77722780	shore:39108/island:21431/shore:39109	intergenic.NA	9.7948e-07	hyper
chr7	96635701	96637230	island:9783/shore:17915	1to5kb.DLX6-AS1/CDS.DLX6/exon.DLX6/intron.DLX6/intron.DLX6-AS1	9.7948e-07	hyper
chr7	23286931	23287890	shore:16946/island:9256/shore:16947	intron.GPNMB	1.00503e-06	hyper
chr13	25743661	25746410	shore:30166/island:16489/shore:30167	promoter.AMER2/CDS.AMER2/5UTR.AMER2/exon.AMER2/intron.AMER2/3UTR.AMER2	1.04967e-06	hyper
chr10	22540981	22543030	island:12840/shore:23486	promoter.LOC100130992/CDS.LOC100130992/5UTR.LOC100130992/exon.LOC100130992/3UTR.LOC100130992	1.10352e-06	hyper
chr1	147532181	147534200	shore:2901/island:1579/shore:2902/island:1580/shore:2903	intergenic.NA	1.1299e-06	hyper
chr7	96649871	96652460	shore:17917/island:9785/shore:17918/island:9786/shore:17919	CDS.DLX5/exon.DLX5/intron.DLX5/3UTR.DLX5	1.1299e-06	hyper
chr9	19787931	19789600	shore:21100/island:11532/shore:21101	promoter.SLC24A2/promoter.NA/1to5kb.SLC24A2/1to5kb.NA/exon.NA/intron.NA	1.20985e-06	hyper
chr7	55256001	55256740	inter:7145	promoter.EGFR-AS1/exon.EGFR-AS1/intron.EGFR/intron.EGFR-AS1	1.21593e-06	hyper
chr1	121260561	121262290	shore:2776/island:1509/shore:2777	promoter.EMBP1/exon.EMBP1/intron.EMBP1	1.2613e-06	hyper
chr12	111470881	111473900	shore:29238/island:15971/shore:29239/island:15972/shore:29240	promoter.CUX2/CDS.CUX2/5UTR.CUX2/exon.CUX2/intron.CUX2	1.31186e-06	hyper
chr12	58025361	58026690	shore:28764/island:15724	promoter.B4GALNT1/CDS.B4GALNT1/5UTR.B4GALNT1/exon.B4GALNT1/intron.B4GALNT1	1.35377e-06	hyper
chr8	85094191	85097500	shelf:17415/shore:20112/island:10979/shore:20113	promoter.RALYL/1to5kb.RALYL/CDS.RALYL/5UTR.RALYL/exon.RALYL/intron.RALYL	1.35844e-06	hyper
chr14	33401441	33404680	shore:31314/island:17131/shore:31315	1to5kb.NPAS3/intergenic.NA	1.38233e-06	hyper
chr11	8283841	8285310	shore:25684/island:14060/shore:25685	CDS.LMO1/5UTR.LMO1/exon.LMO1/intron.LMO1	1.38233e-06	hyper
chr16	28073561	28075470	shore:35079/island:19214/shore:35080	promoter.GSG1L/CDS.GSG1L/5UTR.GSG1L/exon.GSG1L/intron.GSG1L	1.38233e-06	hyper
chr4	30721731	30725120	island:5712/shore:10523	promoter.PCDH7/CDS.PCDH7/5UTR.PCDH7/exon.PCDH7	1.41015e-06	hyper
chr8	55365451	55368430	shore:19862/island:10844/shore:19863	1to5kb.SOX17/intergenic.NA	1.46127e-06	hyper
chr6	99295181	99296940	shore:15326/island:8348/shore:15327	intergenic.NA	1.48731e-06	hyper
chr4	144620491	144622500	shore:11311/island:6140/shore:11312	promoter.FREM3/CDS.FREM3/exon.FREM3	1.48731e-06	hyper
chr10	23982141	23985280	shore:23512/island:12856/shore:23513/island:12857/shore:23514	promoter.KIAA1217/1to5kb.KIAA1217/5UTR.KIAA1217/exon.KIAA1217/intron.KIAA1217	1.50805e-06	hyper
chr2	87015721	87018490	shore:5659/island:3065/shore:5660	CDS.CD8A/5UTR.CD8A/exon.CD8A/intron.RMND5A/intron.CD8A	1.50805e-06	hyper
chr10	50816791	50821010	shore:23848/island:13028/shore:23849/island:13029/shore:23850	promoter.CHAT/promoter.SLC18A3/1to5kb.SLC18A3/1to5kb.CHAT/CDS.SLC18A3/5UTR.CHAT/5UTR.SLC18A3/exon.CHAT/exon.SLC18A3/intron.CHAT/3UTR.SLC18A3	1.53313e-06	hyper
chr10	8095231	8098610	island:12772/shore:23359	promoter.GATA3/promoter.GATA3-AS1/promoter.NA/1to5kb.GATA3/1to5kb.GATA3-AS1/1to5kb.NA/CDS.GATA3/5UTR.GATA3/exon.GATA3/exon.GATA3-AS1/exon.NA/intron.GATA3	1.54833e-06	hyper
chr9	969281	973860	shore:20949/island:11452/shore:20950	1to5kb.DMRT3/intergenic.NA	1.56944e-06	hyper
chr10	118030051	118034460	shore:24746/island:13514/shore:24747	promoter.GFRA1/1to5kb.GFRA1/CDS.GFRA1/5UTR.GFRA1/exon.GFRA1/intron.GFRA1	1.57109e-06	hyper
chr7	116962521	116964390	shore:18271/island:9972	promoter.WNT2/1to5kb.WNT2/CDS.WNT2/5UTR.WNT2/exon.WNT2/intron.WNT2	1.65719e-06	hyper
chr2	71016841	71018450	shore:5443/island:2949/shore:5444	promoter.FIGLA/CDS.FIGLA/5UTR.FIGLA/exon.FIGLA/intron.FIGLA	1.8382e-06	hyper
chr2	119913921	119917440	shore:6113/island:3308/shore:6114	promoter.C1QL2/CDS.C1QL2/5UTR.C1QL2/exon.C1QL2/intron.C1QL2/3UTR.C1QL2	1.84118e-06	hyper
chr4	85402071	85405580	shore:10934/island:5930/shore:10935/island:5931/shore:10936/island:5932/shore:10937	intergenic.NA	1.84118e-06	hyper
chr4	155663181	155666620	shore:11410/island:6193/shore:11411/island:6194/shore:11412	promoter.LRAT/1to5kb.LRAT/CDS.LRAT/5UTR.LRAT/exon.LRAT/intron.NA/intron.LRAT	1.8891e-06	hyper
chr20	61807531	61810930	island:25435/shore:46011	promoter.MIR124-3/1to5kb.MIR124-3/exon.MIR124-3/intergenic.NA	1.8891e-06	hyper
chr20	49638771	49640920	shore:45679/island:25251/shore:45680	promoter.KCNG1/1to5kb.KCNG1/5UTR.KCNG1/exon.KCNG1/intron.KCNG1	1.89757e-06	hyper
chr1	47898121	47900650	shore:1966/island:1079/shore:1967/island:1080/shore:1968	promoter.FOXD2-AS1/1to5kb.FOXD2/exon.FOXD2-AS1	1.91158e-06	hyper
chr16	86548751	86550740	shore:36224/island:19833/shore:36225	intergenic.NA	1.93107e-06	hyper
chr6	100911411	100913620	shore:15365/island:8373/shore:15366	promoter.SIM1/1to5kb.SIM1/5UTR.SIM1/exon.SIM1/intron.SIM1	1.94948e-06	hyper
chr2	5830551	5834520	shore:4691/island:2542/shore:4692/island:2543/shore:4693	promoter.SOX11/1to5kb.SOX11/CDS.SOX11/5UTR.SOX11/exon.SOX11/3UTR.SOX11	1.94948e-06	hyper
chr6	50787021	50788620	shore:15044/island:8198/shore:15045	intron.TFAP2B	1.97905e-06	hyper
chr2	241611051	241613690	shore:7523/island:4080/shore:7524	intergenic.NA	1.97905e-06	hyper
chr11	2160741	2162790	island:13976/shore:25525	promoter.IGF2-AS/promoter.IGF2/1to5kb.IGF2-AS/1to5kb.INS-IGF2/1to5kb.IGF2/CDS.IGF2-AS/CDS.IGF2/5UTR.IGF2-AS/5UTR.IGF2/exon.IGF2-AS/exon.IGF2/intron.IGF2-AS/intron.IGF2/intron.INS-IGF2	2.04252e-06	hyper
chr2	119590691	119594090	shore:6098/island:3296/shore:6099	intergenic.NA	2.06334e-06	hyper
chr6	168501611	168503250	shore:16067/island:8743/shore:16068	intergenic.NA	2.08394e-06	hyper
chr10	134900911	134903870	shore:25151/island:13740/shore:25152	promoter.ADGRA1/CDS.ADGRA1/5UTR.ADGRA1/exon.ADGRA1/intron.ADGRA1	2.08394e-06	hyper
chr13	38442961	38444810	shore:30325/island:16578/shore:30326	promoter.TRPC4/5UTR.TRPC4/exon.TRPC4/intron.TRPC4	2.10735e-06	hyper
chr11	17740221	17743980	shore:25821/island:14133/shore:25822	promoter.MYOD1/CDS.MYOD1/5UTR.MYOD1/exon.MYOD1/intron.MYOD1/3UTR.MYOD1/intergenic.NA	2.11538e-06	hyper
chr20	55199961	55203400	shore:45729/island:25276	promoter.TFAP2C/1to5kb.TFAP2C	2.11538e-06	hyper
chr10	106399291	106403450	shore:24670/island:13476/shore:24671	promoter.SORCS3/1to5kb.SORCS3/CDS.SORCS3/5UTR.SORCS3/exon.SORCS3/intron.SORCS3	2.15577e-06	hyper
chr7	27140481	27144000	shelf:14709/shore:17004/island:9288/shore:17005	promoter.HOXA2/promoter.NA/1to5kb.HOXA1/1to5kb.NA/1to5kb.HOXA2/CDS.HOXA2/CDS.NA/5UTR.HOXA2/5UTR.NA/exon.HOXA2/exon.NA/intron.HOXA2/3UTR.NA	2.15911e-06	hyper
chr9	101705651	101707210	shore:21964/island:11993/shore:21965	promoter.COL15A1/CDS.COL15A1/5UTR.COL15A1/exon.COL15A1/intron.COL15A1	2.16145e-06	hyper
chr19	13616081	13617700	shore:42131/island:23239/shore:42132	promoter.CACNA1A/CDS.CACNA1A/5UTR.CACNA1A/exon.CACNA1A/intron.CACNA1A	2.20194e-06	hyper
chr3	121902311	121903940	shore:8866/island:4798/shore:8867	promoter.CASR/5UTR.CASR/exon.CASR/intron.CASR	2.22879e-06	hyper
chr8	91803351	91804500	shore:20172/island:11009/shore:20173	promoter.NECAB1/promoter.TMEM64/CDS.NECAB1/5UTR.NECAB1/5UTR.TMEM64/exon.NECAB1/exon.TMEM64/intron.NECAB1/intron.TMEM64	2.22946e-06	hyper
chr7	142493971	142495520	shore:18538/island:10114/shore:18539	promoter.NA/1to5kb.NA/CDS.NA/exon.NA/intron.NA/3UTR.NA	2.22946e-06	hyper
chr17	58218361	58219230	shore:38601/island:21161/shore:38602	intergenic.NA	2.22946e-06	hyper
chr1	145990431	145992420	shore:2855/island:1551/shore:2856/island:1552/shore:2857	intron.NBPF20/intron.NBPF10	2.23072e-06	hyper
chr8	55382291	55383480	shore:19866/island:10847/shore:19867	intergenic.NA	2.27107e-06	hyper
chr3	11033941	11035670	shore:7755/island:4209/shore:7756	promoter.SLC6A1/5UTR.SLC6A1/exon.SLC6A1/intron.SLC6A1	2.27107e-06	hyper
chr12	85304981	85307300	shore:28951/island:15820/shore:28952/island:15821/shore:28953/island:15822/shore:28954	promoter.SLC6A15/5UTR.SLC6A15/exon.SLC6A15/intron.SLC6A15	2.27107e-06	hyper
chr2	137521871	137524030	shore:6417/island:3471/shore:6418	promoter.THSD7B/1to5kb.THSD7B/exon.THSD7B/intron.THSD7B	2.27172e-06	hyper
chr11	20617641	20620260	shore:25881/island:14165/shore:25882	promoter.SLC6A5/1to5kb.SLC6A5	2.29006e-06	hyper
chr1	217312561	217314300	shore:4038/shelf:3501	1to5kb.ESRRG	2.29124e-06	hyper
chr19	12830071	12832490	shore:42038/island:23180/shore:42039	CDS.TNPO2/5UTR.TNPO2/exon.TNPO2/intron.TNPO2	2.29124e-06	hyper
chr3	170302341	170304150	shore:9454/island:5108/shore:9455/island:5109/shore:9456	promoter.SLC7A14/5UTR.SLC7A14/exon.SLC7A14/intron.CLDN11/intron.NA/intron.SLC7A14	2.29507e-06	hyper
chr4	21949771	21951220	shore:10473/island:5685/shore:10474/island:5686/shore:10475	promoter.KCNIP4/CDS.KCNIP4/5UTR.KCNIP4/exon.KCNIP4/intron.KCNIP4	2.32494e-06	hyper
chr13	112757671	112762470	shore:30826/island:16852/shore:30827/island:16853/shore:30828	promoter.NA/1to5kb.NA/5UTR.NA/exon.NA	2.50306e-06	hyper
chr1	208083491	208084870	shore:3923/island:2126/shore:3924	promoter.CD34/CDS.CD34/5UTR.CD34/exon.CD34/intron.CD34	2.5534e-06	hyper
chr13	79169421	79171860	shore:30575/island:16712/shore:30576	intron.RNF219-AS1	2.57153e-06	hyper
chr2	120280851	120282650	shore:6126/island:3315/shore:6127	promoter.SCTR/CDS.SCTR/5UTR.SCTR/exon.SCTR/intron.SCTR	2.632e-06	hyper
chr2	119610071	119617100	shore:6107/island:3304/shore:6108/island:3305/shore:6109/island:3306/shore:6110	1to5kb.EN1/intergenic.NA	2.67779e-06	hyper
chr1	47908921	47912310	shore:1970/island:1082/shore:1971	intergenic.NA	2.68301e-06	hyper
chr7	70595951	70598670	shore:17603/island:9620/shore:17604	promoter.GALNT17/1to5kb.GALNT17/CDS.GALNT17/5UTR.GALNT17/exon.GALNT17/intron.GALNT17	2.68301e-06	hyper
chr21	28337511	28340520	shore:46305/island:25612/shore:46306	promoter.ADAMTS5/1to5kb.ADAMTS5/CDS.ADAMTS5/5UTR.ADAMTS5/exon.ADAMTS5/intron.ADAMTS5	2.72686e-06	hyper
chr2	237144841	237146880	shore:7366/island:3995/shore:7367	CDS.ASB18/exon.ASB18/intron.ASB18/3UTR.ASB18	2.74949e-06	hyper
chr10	129533451	129537810	shore:24938/island:13618/shore:24939	promoter.FOXI2/promoter.NA/1to5kb.FOXI2/1to5kb.NA/CDS.FOXI2/CDS.NA/5UTR.NA/exon.FOXI2/exon.NA/intron.FOXI2/3UTR.FOXI2/3UTR.NA	2.86233e-06	hyper
chr1	77332851	77335180	shore:2286/island:1250/shore:2287	promoter.ST6GALNAC5/1to5kb.ST6GALNAC5/CDS.ST6GALNAC5/5UTR.ST6GALNAC5/exon.ST6GALNAC5/intron.ST6GALNAC5	2.89999e-06	hyper
chr4	134067531	134070730	shore:11238/island:6101/shore:11239	promoter.PCDH10/promoter.NA/1to5kb.PCDH10/5UTR.PCDH10/exon.PCDH10/exon.NA/intron.NA	3.08406e-06	hyper
chr4	111549621	111552670	shore:11099/island:6020/shore:11100	intron.PITX2	3.09516e-06	hyper
chr6	166579631	166583780	shore:15991/island:8703/shore:15992	promoter.TBXT/1to5kb.TBXT/CDS.TBXT/5UTR.TBXT/exon.TBXT/intron.TBXT	3.1912e-06	hyper
chr8	99438201	99441470	shore:20249/island:11050/shore:20250	promoter.KCNS2/promoter.NA/1to5kb.KCNS2/1to5kb.NA/CDS.KCNS2/CDS.NA/5UTR.KCNS2/exon.KCNS2/exon.NA/intron.KCNS2	3.24063e-06	hyper
chr4	107955051	107957790	shore:11055/island:5995/shore:11056	promoter.DKK2/CDS.DKK2/5UTR.DKK2/exon.DKK2/intron.DKK2	3.2657e-06	hyper
chr2	95690531	95694230	shore:5744/island:3110/shore:5745	promoter.MAL/CDS.MAL/5UTR.MAL/exon.MAL/intron.MAL	3.2657e-06	hyper
chr7	45612961	45615820	shore:17281/island:9445/shore:17282	promoter.ADCY1/1to5kb.ADCY1/CDS.ADCY1/5UTR.ADCY1/exon.ADCY1/intron.ADCY1	3.34175e-06	hyper
chr9	841111	843690	shore:20947/island:11451/shore:20948	promoter.DMRT1/CDS.DMRT1/5UTR.DMRT1/exon.DMRT1/intron.DMRT1	3.43423e-06	hyper
chr4	155410331	155412750	shore:11403/island:6189	CDS.DCHS2/5UTR.DCHS2/exon.DCHS2/intron.DCHS2	3.44738e-06	hyper
chr8	143530251	143534450	shore:20597/island:11237/shore:20598/island:11238	intergenic.NA	3.52072e-06	hyper
chr11	69588571	69590790	shore:26866/island:14714/shore:26867	promoter.FGF4/CDS.FGF4/5UTR.FGF4/exon.FGF4/intron.FGF4	3.52072e-06	hyper
chr6	151560531	151562860	shore:15827/island:8620/shore:15828/island:8621/shore:15829	promoter.AKAP12/CDS.AKAP12/5UTR.AKAP12/exon.AKAP12/intron.AKAP12	3.53793e-06	hyper
chr11	124738151	124739320	shore:27584/island:15090/shore:27585	CDS.ROBO3/exon.ROBO3/intron.ROBO3	3.55109e-06	hyper
chr8	132051391	132055150	shore:20464/island:11164/shore:20465	promoter.ADCY8/1to5kb.ADCY8/CDS.ADCY8/5UTR.ADCY8/exon.ADCY8/intron.ADCY8	3.55969e-06	hyper
chr16	31548021	31549490	shore:35356/island:19364/shore:35357	intergenic.NA	3.5686e-06	hyper
chr8	116679411	116680540	shore:20366/island:11112/shore:20367	promoter.TRPS1/CDS.TRPS1/5UTR.TRPS1/exon.TRPS1/intron.TRPS1	3.60055e-06	hyper
chr17	50234761	50238100	shore:38485/island:21099/shore:38486	promoter.CA10/1to5kb.CA10/CDS.CA10/5UTR.CA10/exon.CA10/intron.CA10	3.75107e-06	hyper
chr20	3640881	3642380	shore:44913/island:24837/shore:44914	CDS.GFRA4/exon.GFRA4/intron.GFRA4/3UTR.GFRA4	3.83331e-06	hyper
chr3	62353341	62360740	shore:8545/island:4632/shore:8546/island:4633/shore:8547/island:4634/shore:8548/island:4635/shore:8549/island:4636/shore:8550	promoter.FEZF2/1to5kb.FEZF2/CDS.FEZF2/5UTR.FEZF2/exon.FEZF2/intron.FEZF2/3UTR.FEZF2/intergenic.NA	4.06371e-06	hyper
chr2	70994201	70995770	shore:5441/island:2948/shore:5442	promoter.ADD2/CDS.ADD2/5UTR.ADD2/exon.ADD2/intron.ADD2	4.07686e-06	hyper
chr22	46261241	46264070	shore:47883/island:26455/shore:47884	intergenic.NA	4.07686e-06	hyper
chr1	147520451	147522510	shore:2899/island:1578/shore:2900	promoter.NA/1to5kb.NA/exon.NA/intergenic.NA	4.21205e-06	hyper
chr4	17782461	17784110	shore:10463/island:5680/shore:10464	promoter.FAM184B/CDS.FAM184B/5UTR.FAM184B/exon.FAM184B/intron.FAM184B	4.21205e-06	hyper
chr16	58018111	58020230	shore:35687/island:19542/shore:35688/island:19543/shore:35689	CDS.TEPP/exon.TEPP/intron.TEPP	4.31318e-06	hyper
chr6	41605611	41607640	island:8103/shore:14867/island:8104/shore:14868	promoter.MDFI/CDS.MDFI/5UTR.MDFI/exon.MDFI/intron.MDFI	4.32205e-06	hyper
chr20	53091521	53093440	shore:45713/island:25268/shore:45714	promoter.DOK5/CDS.DOK5/5UTR.DOK5/exon.DOK5/intron.DOK5	4.46562e-06	hyper
chr11	32447911	32450910	shore:25951/island:14206/shore:25952	CDS.WT1/exon.WT1/intron.WT1	4.47036e-06	hyper
chr5	180016901	180019200	shore:13844/island:7537/shore:13845	promoter.SCGB3A1/CDS.SCGB3A1/5UTR.SCGB3A1/exon.SCGB3A1/intron.SCGB3A1/3UTR.SCGB3A1/intergenic.NA	4.47036e-06	hyper
chr4	172733561	172735410	shore:11499/island:6239/shore:11500	promoter.GALNTL6/1to5kb.GALNTL6/5UTR.GALNTL6/exon.GALNTL6/intron.GALNTL6	4.47036e-06	hyper
chr19	37286281	37288970	shelf:36414/shore:43055/island:23763/shore:43056	promoter.ZNF790-AS1/1to5kb.ZNF790-AS1/exon.ZNF790-AS1/intron.ZNF790-AS1	4.4842e-06	hyper
chr5	138728421	138731210	island:7069/shore:13009	promoter.PROB1/1to5kb.MZB1/CDS.PROB1/5UTR.PROB1/exon.PROB1	4.49125e-06	hyper
chr16	87636181	87637900	shore:36264/island:19856/shore:36265	promoter.JPH3/CDS.JPH3/5UTR.JPH3/exon.JPH3/intron.JPH3/3UTR.JPH3	4.49125e-06	hyper
chr6	166401781	166403000	island:8700/shore:15986	promoter.LINC00473/1to5kb.NA/1to5kb.LINC00473/exon.LINC00602/3UTR.LINC00602	4.49125e-06	hyper
chr7	79081261	79084330	shore:17801/island:9724/shore:17802/island:9725/shore:17803/island:9726/shore:17804	promoter.MAGI2-AS3/promoter.MAGI2/1to5kb.MAGI2-AS3/1to5kb.MAGI2/CDS.MAGI2/5UTR.MAGI2/exon.MAGI2-AS3/exon.MAGI2/intron.MAGI2-AS3/intron.MAGI2	4.49125e-06	hyper
chr13	28500471	28504070	shore:30208/island:16513/shore:30209/island:16514/shore:30210/island:16515/shore:30211	intergenic.NA	4.49216e-06	hyper
chr19	39754571	39756880	shore:43221/island:23860/shore:43222	1to5kb.IFNL2	4.65492e-06	hyper
chr20	61048061	61052210	shore:45928/island:25386/shore:45929	promoter.GATA5/1to5kb.GATA5/CDS.GATA5/5UTR.GATA5/exon.GATA5/intron.GATA5	4.65492e-06	hyper
chr14	95239081	95240800	shore:32074/island:17534/shore:32075/island:17535/shore:32076	1to5kb.GSC	4.65492e-06	hyper
chr11	115629681	115631550	shore:27384/island:14984/shore:27385	promoter.LINC00900/exon.LINC00900/intron.LINC00900	4.69044e-06	hyper
chr2	66808251	66810840	shore:5386/island:2920/shore:5387	intergenic.NA	4.71486e-06	hyper
chr7	27145781	27148730	shore:17005/island:9289/shore:17006/island:9290/shore:17007	1to5kb.HOXA2/1to5kb.NA/CDS.HOXA3/exon.HOXA3/intron.HOXA3/3UTR.HOXA3	4.72338e-06	hyper
chr5	134362511	134365590	shore:12922/island:7022/shore:12923	1to5kb.C5orf66/CDS.PITX1/exon.PITX1/intron.PITX1/3UTR.PITX1/intergenic.NA	4.72338e-06	hyper
chr13	28495501	28499420	island:16511/shore:30207/island:16512/shore:30208	CDS.PDX1/exon.PDX1/intron.PDX1/3UTR.PDX1	4.79515e-06	hyper
chr5	172658851	172662420	shore:13548/island:7374/shore:13549/island:7375/shore:13550/island:7376/shore:13551	promoter.NKX2-5/CDS.NKX2-5/5UTR.NKX2-5/exon.NKX2-5/intron.NKX2-5/3UTR.NKX2-5/intergenic.NA	4.81206e-06	hyper
chr2	66652471	66654490	shore:5377/island:2914/shore:5378	exon.MEIS1-AS3/intron.MEIS1-AS3	4.96684e-06	hyper
chr5	174158111	174160620	shore:13574/island:7390/shore:13575	intergenic.NA	4.96684e-06	hyper
chr6	10416961	10420350	shore:14087/island:7679/shore:14088/island:7680/shore:14089	promoter.TFAP2A/1to5kb.TFAP2A/CDS.TFAP2A/5UTR.TFAP2A/exon.TFAP2A/intron.TFAP2A	5.11001e-06	hyper
chr9	113340911	113342350	shore:22070/island:12048/shore:22071	promoter.SVEP1/CDS.SVEP1/5UTR.SVEP1/exon.SVEP1/intron.SVEP1	5.17992e-06	hyper
chr10	110671401	110672570	shore:24678/island:13480/shore:24679	intergenic.NA	5.20381e-06	hyper
chr6	26777671	26781580	inter:5940	promoter.NA/1to5kb.NA/exon.NA/intergenic.NA	5.27879e-06	hyper
chr22	48970531	48973200	shore:47999/island:26516/shore:48000	promoter.FAM19A5/1to5kb.FAM19A5/CDS.FAM19A5/5UTR.FAM19A5/exon.FAM19A5/intron.FAM19A5	5.37027e-06	hyper
chr7	149916291	149919330	shore:18643/island:10168/shore:18644	intergenic.NA	5.40055e-06	hyper
chr6	108495351	108496850	shore:15434/island:8412/shore:15435/island:8413	CDS.NR2E1/exon.NR2E1/intron.NR2E1	5.43068e-06	hyper
chr17	27938951	27941260	shore:37566/island:20591/shore:37567	CDS.ANKRD13B/exon.ANKRD13B/intron.ANKRD13B/3UTR.ANKRD13B	5.61057e-06	hyper
chr6	10389471	10391830	shore:14076/island:7671/shore:14077/island:7672/shore:14078	intergenic.NA	5.62779e-06	hyper
chr9	77112451	77115150	shore:21621/island:11808/shore:21622/island:11809/shore:21623	CDS.RORB/5UTR.RORB/exon.RORB/intron.RORB	5.72829e-06	hyper
chr19	9517181	9518270	shore:41739/island:23017/shore:41740	intergenic.NA	5.81222e-06	hyper
chr14	74705931	74709190	shore:31817/island:17399/shore:31818	promoter.VSX2/CDS.VSX2/5UTR.VSX2/exon.VSX2/intron.VSX2	5.81222e-06	hyper
chr9	96713841	96718410	island:11918/shore:21828	promoter.BARX1/1to5kb.BARX1/CDS.BARX1/5UTR.BARX1/exon.BARX1/intron.BARX1/3UTR.BARX1/intergenic.NA	5.90409e-06	hyper
chr8	58906551	58908110	shore:19908/island:10870/shore:19909	promoter.FAM110B/5UTR.FAM110B/exon.FAM110B/intron.FAM110B	5.90409e-06	hyper
chr13	53418641	53423420	shore:30503/island:16672/shore:30504	promoter.PCDH8/CDS.PCDH8/5UTR.PCDH8/exon.PCDH8/intron.PCDH8/3UTR.PCDH8	5.90409e-06	hyper
chr20	41816921	41819500	shore:45457/island:25133/shore:45458	promoter.PTPRT/CDS.PTPRT/5UTR.PTPRT/exon.PTPRT/intron.PTPRT	5.99486e-06	hyper
chr16	71459481	71460630	shore:35952/island:19687/shore:35953	promoter.NA/exon.NA/intergenic.NA	5.99488e-06	hyper
chr2	5835751	5837890	shore:4693/island:2544/shore:4694	exon.SOX11/3UTR.SOX11	6.09004e-06	hyper
chr3	10748971	10750250	inter:3232	promoter.ATP2B2/5UTR.ATP2B2/exon.ATP2B2/intron.ATP2B2	6.09004e-06	hyper
chr6	152128261	152130620	shore:15840/island:8627/shore:15841	promoter.ESR1/CDS.ESR1/5UTR.ESR1/exon.ESR1/intron.ESR1/3UTR.ESR1	6.09004e-06	hyper
chr1	35394281	35396370	shore:1545/island:859/shore:1546	intergenic.NA	6.13632e-06	hyper
chr6	108440041	108441530	island:8407/shore:15426	1to5kb.NA	6.298e-06	hyper
chr1	224803481	224806040	shore:4123/island:2238/shore:4124/island:2239/shore:4125	promoter.CNIH3/CDS.CNIH3/5UTR.CNIH3/exon.CNIH3/intron.CNIH3	6.37558e-06	hyper
chr8	54791481	54796230	shore:19854/island:10840/shore:19855	promoter.RGS20/1to5kb.RGS20/CDS.RGS20/5UTR.RGS20/exon.RGS20/intron.RGS20	6.41103e-06	hyper
chr13	53312541	53314310	shore:30501/island:16671/shore:30502	promoter.CNMD/CDS.CNMD/5UTR.CNMD/exon.CNMD/intron.CNMD	6.41999e-06	hyper
chr5	37834341	37841020	shore:12159/island:6613/shore:12160/island:6614/shore:12161	promoter.GDNF-AS1/promoter.GDNF/1to5kb.GDNF-AS1/1to5kb.GDNF/CDS.GDNF/5UTR.GDNF/exon.GDNF-AS1/exon.GDNF/intron.GDNF-AS1/intron.GDNF	6.54415e-06	hyper
chr13	58203271	58209450	shore:30523/island:16685/shore:30524/island:16686/shore:30525	promoter.PCDH17/1to5kb.PCDH17/CDS.PCDH17/5UTR.PCDH17/exon.PCDH17/intron.PCDH17	6.54415e-06	hyper
chr4	8858531	8860800	shore:10376/island:5631	intergenic.NA	6.71616e-06	hyper
chr5	140864141	140865850	shore:13213/island:7194/shore:13214	promoter.PCDHGC4/1to5kb.PCDHGC5/CDS.PCDHGC4/exon.PCDHGC4/intron.PCDHGA1/intron.PCDHGA2/intron.PCDHGA3/intron.PCDHGB1/intron.PCDHGA4/intron.PCDHGB2/intron.PCDHGA5/intron.PCDHGB3/intron.PCDHGA6/intron.PCDHGA7/intron.PCDHGB4/intron.PCDHGA8/intron.PCDHGB5/intron.PCDHGA9/intron.PCDHGB6/intron.PCDHGA10/intron.PCDHGB7/intron.PCDHGA11/intron.PCDHGA12/intron.PCDHGC3	6.72925e-06	hyper
chr17	72347661	72348660	shore:38809/island:21275/shore:38810	CDS.KIF19/exon.KIF19/intron.KIF19	6.79861e-06	hyper
chr8	54163011	54164730	shore:19845/island:10835/shore:19846	promoter.OPRK1/1to5kb.OPRK1/CDS.OPRK1/5UTR.OPRK1/exon.OPRK1/intron.OPRK1	6.99522e-06	hyper
chr6	127438601	127442500	shore:15593/island:8495/shore:15594/island:8496/shore:15595	promoter.RSPO3/promoter.NA/1to5kb.RSPO3/1to5kb.NA/CDS.RSPO3/5UTR.RSPO3/exon.RSPO3/exon.NA/intron.RSPO3/intron.NA	7.09717e-06	hyper
chr1	119542711	119544540	shore:2746/island:1493/shore:2747/island:1494/shore:2748	intergenic.NA	7.1214e-06	hyper
chr20	25061441	25063300	shore:45138/island:24962/shore:45139	promoter.VSX1/CDS.VSX1/5UTR.VSX1/exon.VSX1/intron.VSX1	7.1214e-06	hyper
chr5	38555901	38557840	shore:12164/island:6616/shore:12165	promoter.NA/promoter.LIFR/promoter.MIR3650/1to5kb.NA/1to5kb.LIFR/5UTR.LIFR/exon.NA/exon.LIFR/exon.MIR3650/intron.LIFR	7.26788e-06	hyper
chr11	31846081	31849140	shore:25942/island:14201/shore:25943/island:14202/shore:25944	intron.PAX6-AS1/intron.RCN1	7.41057e-06	hyper
chr1	151341321	151342720	inter:1227	CDS.SELENBP1/5UTR.SELENBP1/exon.SELENBP1/intron.SELENBP1	7.53237e-06	hyper
chr7	45959881	45962080	shore:17287/island:9448/shore:17288	promoter.IGFBP3/1to5kb.IGFBP3/CDS.IGFBP3/5UTR.IGFBP3/exon.IGFBP3/intron.IGFBP3	7.58135e-06	hyper
chr16	77468031	77469500	shore:36050/island:19737/shore:36051	promoter.ADAMTS18/1to5kb.ADAMTS18/CDS.ADAMTS18/5UTR.ADAMTS18/exon.ADAMTS18/intron.ADAMTS18	7.6719e-06	hyper
chr11	12029451	12031230	shore:25747/island:14093/shore:25748	promoter.DKK3/1to5kb.DKK3/CDS.DKK3/5UTR.DKK3/exon.DKK3/intron.DKK3	7.6719e-06	hyper
chr5	5137461	5141210	shore:11982/island:6522/shore:11983	promoter.ADAMTS16/1to5kb.ADAMTS16/1to5kb.NA/CDS.ADAMTS16/5UTR.ADAMTS16/exon.ADAMTS16/intron.ADAMTS16	7.75704e-06	hyper
chr1	170628731	170631680	shore:3530/island:1921/shore:3531	1to5kb.PRRX1	7.76753e-06	hyper
chr1	119548501	119551560	shore:2749/island:1495/shore:2750	intergenic.NA	7.91836e-06	hyper
chr6	87646551	87647900	shore:15253/island:8308/shore:15254	promoter.HTR1E/5UTR.HTR1E/exon.HTR1E/intron.HTR1E	7.91836e-06	hyper
chr6	10420711	10423110	shore:14089/island:7681/shore:14090/island:7682/shore:14091	promoter.TFAP2A/1to5kb.TFAP2A	7.96933e-06	hyper
chr8	67873111	67875910	shore:19994/island:10917/shore:19995	promoter.TCF24/1to5kb.TCF24/CDS.TCF24/5UTR.TCF24/exon.TCF24/intron.TCF24	8.11039e-06	hyper
chr13	39260881	39263930	shore:30329/island:16580/shore:30330	promoter.FREM2/CDS.FREM2/5UTR.FREM2/exon.FREM2	8.15414e-06	hyper
chr12	122015881	122017350	shore:29491/island:16112	CDS.KDM2B/5UTR.KDM2B/exon.KDM2B/intron.KDM2B	8.27216e-06	hyper
chr6	150285061	150286800	island:8609/shore:15806	promoter.ULBP1/CDS.ULBP1/5UTR.ULBP1/exon.ULBP1/intron.ULBP1	8.61928e-06	hyper
chr9	135454871	135458890	shore:22649/island:12358/shore:22650	promoter.BARHL1/1to5kb.BARHL1/CDS.BARHL1/5UTR.BARHL1/exon.BARHL1/intron.BARHL1	8.71842e-06	hyper
chr1	115879711	115881620	shore:2696/island:1466/shore:2697	promoter.NGF/5UTR.NGF/exon.NGF/intron.NGF	8.92733e-06	hyper
chr14	97684751	97686250	shore:32111/island:17553/shore:32112	intergenic.NA	9.05178e-06	hyper
chr16	86529651	86533260	shore:36219/island:19829/shore:36220	intron.FENDRR	9.08094e-06	hyper
chr8	144239641	144242470	shore:20644/island:11263/shore:20645	promoter.LY6H/1to5kb.LY6H/CDS.LY6H/5UTR.LY6H/exon.LY6H/intron.LY6H/3UTR.LY6H	9.08209e-06	hyper
chr1	98518731	98520130	shore:2480/island:1354/shore:2481	1to5kb.MIR137HG	9.21032e-06	hyper
chr10	50322731	50324070	shore:23838/island:13023/shore:23839	promoter.VSTM4/CDS.VSTM4/5UTR.VSTM4/exon.VSTM4/intron.VSTM4	9.21032e-06	hyper
chr2	233215341	233218010	shore:7273/island:3945/shore:7274	intergenic.NA	9.21397e-06	hyper
chr9	102590111	102591600	shore:21975/island:11999/shore:21976	CDS.NR4A3/5UTR.NR4A3/exon.NR4A3/intron.NR4A3	9.21788e-06	hyper
chr5	170740261	170744420	shore:13493/island:7343/shore:13494/island:7344/shore:13495	1to5kb.NA/intergenic.NA	9.3876e-06	hyper
chr8	99984331	99987260	shore:20257/island:11055/shore:20258/island:11056/shore:20259	intergenic.NA	9.43825e-06	hyper
chr6	10381291	10383470	shore:14072/island:7668/shore:14073	intergenic.NA	9.6268e-06	hyper
chr2	73518191	73521080	shore:5509/island:2985/shore:5510	promoter.EGR4/1to5kb.NA/CDS.EGR4/5UTR.EGR4/exon.EGR4/intron.EGR4/3UTR.EGR4	9.6268e-06	hyper
chr1	145978721	145980780	shore:2853/island:1550/shore:2854	promoter.NA/1to5kb.NA/exon.NA/intron.NBPF20/intron.NBPF10	9.7894e-06	hyper
chr1	66257621	66259460	shore:2218/island:1213/shore:2219	promoter.PDE4B/1to5kb.PDE4B/5UTR.PDE4B/exon.PDE4B/intron.PDE4B	9.7894e-06	hyper
chr11	8040101	8041830	shore:25676/island:14056/shore:25677	promoter.TUB/1to5kb.NA/CDS.TUB/5UTR.TUB/exon.TUB/intron.TUB	9.7894e-06	hyper
chr11	134281021	134283020	shore:27735/island:15171/shore:27736	promoter.LOC283177/promoter.B3GAT1/1to5kb.LOC283177/1to5kb.B3GAT1/5UTR.B3GAT1/exon.LOC283177/exon.B3GAT1/intron.LOC283177/intron.B3GAT1	9.80385e-06	hyper
chr15	101420051	101421440	island:18567/shore:34006	CDS.ALDH1A3/5UTR.ALDH1A3/exon.ALDH1A3/intron.ALDH1A3	1.00045e-05	hyper
chr11	94501131	94503180	shore:27230/island:14905/shore:27231	promoter.AMOTL1/CDS.AMOTL1/5UTR.AMOTL1/exon.AMOTL1/intron.AMOTL1	1.01135e-05	hyper
chr1	110692701	110694500	shore:2601/island:1416/shore:2602	promoter.SLC6A17/5UTR.SLC6A17/exon.SLC6A17/intron.SLC6A17	1.02861e-05	hyper
chr3	237981	240470	shore:7644/island:4151/shore:7645	promoter.CHL1/1to5kb.CHL1/5UTR.CHL1/exon.CHL1/intron.CHL1	1.03155e-05	hyper
chr5	115150981	115153000	shore:12734/island:6922/shore:12735	promoter.CDO1/CDS.CDO1/5UTR.CDO1/exon.CDO1/intron.CDO1	1.03155e-05	hyper
chr22	43806981	43808740	shore:47821/island:26423/shore:47822	promoter.MPPED1/1to5kb.MPPED1/5UTR.MPPED1/exon.MPPED1/intron.MPPED1	1.03155e-05	hyper
chr12	114876881	114879400	shore:29326/island:16021/shore:29327	intergenic.NA	1.03155e-05	hyper
chr5	149681411	149682470	shore:13320/island:7251	CDS.ARSI/5UTR.ARSI/exon.ARSI/intron.ARSI	1.03444e-05	hyper
chr10	122216101	122217870	shore:24825/island:13557/shore:24826	promoter.PLPP4/CDS.PLPP4/5UTR.PLPP4/exon.PLPP4/intron.PLPP4	1.03444e-05	hyper
chr19	58569691	58572720	shore:44693/island:24714/shore:44694	promoter.ZNF135/CDS.ZNF135/5UTR.ZNF135/exon.ZNF135/intron.ZNF135	1.03444e-05	hyper
chr20	643721	645610	shore:44794/island:24772/shore:44795	CDS.SCRT2/exon.SCRT2/intron.SRXN1/intron.SCRT2/3UTR.SCRT2	1.04401e-05	hyper
chr20	47934461	47936580	shore:45632/island:25226/shore:45633	intergenic.NA	1.0448e-05	hyper
chr9	127264881	127268760	shore:22283/island:12167/shore:22284	promoter.NR5A1/1to5kb.NR5A1/CDS.NR5A1/5UTR.NR5A1/exon.NR5A1/intron.NR5A1	1.0448e-05	hyper
chr16	86598561	86602930	shore:36231/island:19837/shore:36232	promoter.FOXC2/1to5kb.FOXC2/CDS.FOXC2/5UTR.FOXC2/exon.FOXC2/3UTR.FOXC2/intergenic.NA	1.05092e-05	hyper
chr10	100993251	100994510	shore:24422/island:13328/shore:24423	intron.HPSE2	1.05092e-05	hyper
chr12	129337291	129339210	shore:29702/island:16225/shore:29703	promoter.GLT1D1/CDS.GLT1D1/5UTR.GLT1D1/exon.GLT1D1/intron.GLT1D1	1.05258e-05	hyper
chr12	3599791	3603290	shore:27835/island:15222/shore:27836	promoter.PRMT8/promoter.NA/1to5kb.NA/CDS.PRMT8/5UTR.PRMT8/exon.PRMT8/exon.NA/intron.PRMT8/intron.NA	1.05263e-05	hyper
chr16	10273631	10277650	shore:34772/island:19048/shore:34773	promoter.GRIN2A/1to5kb.GRIN2A/CDS.GRIN2A/5UTR.GRIN2A/exon.GRIN2A/intron.GRIN2A/3UTR.GRIN2A	1.05939e-05	hyper
chr4	8872571	8875290	shore:10379/island:5634/shore:10380/island:5635	promoter.HMX1/1to5kb.HMX1/CDS.HMX1/5UTR.HMX1/exon.HMX1/intron.HMX1	1.06437e-05	hyper
chr20	54578001	54581290	shore:45715/island:25269/shore:45716	promoter.CBLN4/CDS.CBLN4/5UTR.CBLN4/exon.CBLN4/intron.CBLN4	1.09263e-05	hyper
chr9	101469111	101472430	shore:21958/island:11990/shore:21959	promoter.GABBR2/CDS.GABBR2/5UTR.GABBR2/exon.GABBR2/intron.GABBR2	1.09263e-05	hyper
chr15	28351181	28355740	shore:32676/island:17864/shore:32677	intergenic.NA	1.09379e-05	hyper
chr7	64029281	64031200	shore:17501/island:9568/shore:17502	1to5kb.LOC100128885/intergenic.NA	1.11637e-05	hyper
chr5	155106991	155109650	shore:13395/island:7290/shore:13396	intergenic.NA	1.11968e-05	hyper
chr8	143591321	143593270	shore:20608/island:11244/shore:20609	CDS.ADGRB1/exon.ADGRB1/intron.ADGRB1	1.11968e-05	hyper
chr13	25620661	25621810	shore:30160/island:16486/shore:30161	intergenic.NA	1.11991e-05	hyper
chr5	145724931	145726120	shore:13275/island:7228/shore:13276	intergenic.NA	1.12692e-05	hyper
chr12	29935651	29937750	shore:28156/island:15391/shore:28157	promoter.TMTC1/1to5kb.TMTC1/CDS.TMTC1/5UTR.TMTC1/exon.TMTC1/intron.TMTC1	1.1536e-05	hyper
chr16	86611651	86614110	shore:36234/island:19839/shore:36235	promoter.FOXL1/CDS.FOXL1/5UTR.FOXL1/exon.FOXL1/3UTR.FOXL1	1.1536e-05	hyper
chr11	503161	505260	shore:25312/island:13843/shore:25313	promoter.RNH1/1to5kb.RNH1/5UTR.RNH1/exon.RNH1/intron.RNH1	1.16982e-05	hyper
chr1	111215601	111218590	shore:2616/island:1424/shore:2617	promoter.KCNA3/CDS.KCNA3/5UTR.KCNA3/exon.KCNA3/3UTR.KCNA3	1.18499e-05	hyper
chr16	55357101	55359250	shore:35599/island:19494/shore:35600	promoter.IRX6/1to5kb.IRX6/CDS.IRX6/5UTR.IRX6/exon.IRX6/intron.IRX6	1.18499e-05	hyper
chr10	106398371	106399210	shore:24670	1to5kb.SORCS3	1.18499e-05	hyper
chr2	119602381	119608200	shore:6102/island:3299/shore:6103/island:3300/shore:6104/island:3301/shore:6105/island:3302/shore:6106/island:3303/shore:6107	promoter.EN1/1to5kb.EN1/CDS.EN1/5UTR.EN1/exon.EN1/intron.EN1	1.18499e-05	hyper
chr6	58146401	58149920	inter:6264	promoter.NA/1to5kb.NA/exon.NA/intergenic.NA	1.2001e-05	hyper
chr16	86541031	86542700	shore:36222/island:19831	promoter.FENDRR/1to5kb.FOXF1/exon.FENDRR/intron.FENDRR	1.20881e-05	hyper
chr3	186078411	186080480	shore:9630/island:5200/shore:9631	promoter.DGKG/5UTR.DGKG/exon.DGKG/intron.DGKG	1.21516e-05	hyper
chr2	114048481	114049370	shore:6057/island:3275/shore:6058	intergenic.NA	1.22417e-05	hyper
chr14	76604671	76605660	shore:31875/island:17429/shore:31876	intergenic.NA	1.22447e-05	hyper
chr10	91294171	91297030	shore:24271/island:13247/shore:24272	promoter.SLC16A12/1to5kb.SLC16A12/5UTR.SLC16A12/exon.SLC16A12/intron.SLC16A12	1.22911e-05	hyper
chr15	48936561	48938830	shore:33058/island:18067/shore:33059	promoter.FBN1/CDS.FBN1/5UTR.FBN1/exon.FBN1/intron.FBN1	1.23152e-05	hyper
chr1	9711881	9713270	island:393/shore:669	exon.PIK3CD-AS1/intron.PIK3CD/3UTR.PIK3CD-AS1	1.24726e-05	hyper
chr1	229542611	229544220	shore:4283/island:2325/shore:4284	intergenic.NA	1.27568e-05	hyper
chr4	147575851	147577030	shore:11338/island:6154/shore:11339	intergenic.NA	1.28641e-05	hyper
chr3	172165121	172168600	shore:9471/island:5117/shore:9472/island:5118/shore:9473	promoter.GHSR/1to5kb.GHSR/CDS.GHSR/5UTR.GHSR/exon.GHSR/intron.GHSR/3UTR.GHSR	1.29915e-05	hyper
chr14	77735921	77738710	shore:31907/island:17446/shore:31908	promoter.NGB/1to5kb.NGB/CDS.NGB/5UTR.NGB/exon.NGB/intron.NGB	1.30897e-05	hyper
chr4	184825981	184828500	shore:11578/island:6283/shore:11579	promoter.STOX2/CDS.STOX2/5UTR.STOX2/exon.STOX2/intron.STOX2	1.33204e-05	hyper
chr17	47987261	47988360	shore:38407/island:21058/shore:38408	intergenic.NA	1.34331e-05	hyper
chr20	39315401	39317920	shore:45437/island:25122/shore:45438/island:25123	promoter.MAFB/CDS.MAFB/5UTR.MAFB/exon.MAFB/3UTR.MAFB	1.34426e-05	hyper
chr2	115918431	115921070	shore:6080/island:3287/shore:6081	promoter.DPP10/promoter.DPP10-AS1/1to5kb.DPP10/1to5kb.DPP10-AS1/CDS.DPP10/5UTR.DPP10/exon.DPP10/exon.DPP10-AS1/intron.DPP10/intron.DPP10-AS1	1.34663e-05	hyper
chr16	67195321	67200640	shore:35782/island:19596/shore:35783/island:19597/shore:35784	promoter.HSF4/1to5kb.HSF4/1to5kb.NOL3/1to5kb.TRADD/CDS.FBXL8/CDS.HSF4/5UTR.FBXL8/5UTR.HSF4/exon.FBXL8/exon.HSF4/intron.FBXL8/intron.HSF4/3UTR.FBXL8	1.34663e-05	hyper
chr5	32710871	32714470	island:6593/shore:12120	promoter.NPR3/CDS.NPR3/5UTR.NPR3/exon.NPR3/intron.NPR3	1.34663e-05	hyper
chr17	6616041	6617860	shore:36963/island:20260/shore:36964	promoter.SLC13A5/1to5kb.SLC13A5/CDS.SLC13A5/5UTR.SLC13A5/exon.SLC13A5/intron.SLC13A5	1.35147e-05	hyper
chr8	57069361	57070360	shore:19883/island:10856/shore:19884	intergenic.NA	1.38074e-05	hyper
chr12	54378601	54381320	shore:28592/island:15625/shore:28593	promoter.HOXC10/1to5kb.MIR196A2/CDS.HOXC10/5UTR.HOXC10/exon.HOXC10/intron.HOXC10	1.3838e-05	hyper
chr3	69590701	69592350	shore:8600/island:4663/shore:8601	promoter.FRMD4B/exon.FRMD4B/intron.FRMD4B	1.40203e-05	hyper
chr20	622661	623760	shore:44789/island:24769/shore:44790	intergenic.NA	1.43292e-05	hyper
chr19	30718141	30720280	island:23602/shore:42775	intergenic.NA	1.43687e-05	hyper
chr1	16084461	16086970	shore:835/island:484/shore:836	promoter.FBLIM1/1to5kb.FBLIM1/5UTR.FBLIM1/exon.FBLIM1/intron.FBLIM1	1.44648e-05	hyper
chr12	41581591	41583960	shore:28234/island:15433/shore:28235	promoter.PDZRN4/CDS.PDZRN4/5UTR.PDZRN4/exon.PDZRN4/intron.PDZRN4	1.47446e-05	hyper
chr7	136553131	136556540	shore:18469/island:10079/shore:18470	promoter.CHRM2/5UTR.CHRM2/exon.CHRM2/intron.CHRM2	1.49951e-05	hyper
chr11	133824811	133826430	shore:27711/island:15158	intron.IGSF9B	1.51004e-05	hyper
chr3	42304681	42307870	shore:8074/island:4378/shore:8075/island:4379/shore:8076	promoter.CCK/1to5kb.CCK/CDS.CCK/5UTR.CCK/exon.CCK/intron.CCK/3UTR.CCK	1.53403e-05	hyper
chr11	92702271	92703720	shore:27200/island:14890/shore:27201	promoter.MTNR1B/CDS.MTNR1B/5UTR.MTNR1B/exon.MTNR1B/intron.MTNR1B	1.56657e-05	hyper
chr9	21967041	21969270	shore:21123/island:11544/shore:21124	promoter.CDKN2A-DT/CDS.CDKN2A-DT/CDS.CDKN2A/5UTR.CDKN2A-DT/exon.CDKN2A-DT/exon.CDKN2A/intron.MTAP/intron.CDKN2A/3UTR.CDKN2A-DT/3UTR.CDKN2A	1.57454e-05	hyper
chr5	127871701	127875240	shore:12816/island:6967/shore:12817/island:6968/shore:12818	promoter.FBN2/1to5kb.FBN2/CDS.FBN2/5UTR.FBN2/exon.FBN2/intron.FBN2	1.57752e-05	hyper
chr13	112709171	112713000	shore:30820/island:16847/shore:30821	intergenic.NA	1.59796e-05	hyper
chr19	48944771	48948190	shore:43898/island:24253/shore:43899	promoter.GRWD1/1to5kb.GRWD1/CDS.GRIN2D/5UTR.GRIN2D/exon.GRIN2D/intron.GRIN2D/3UTR.GRIN2D	1.6358e-05	hyper
chr17	77178251	77180460	shore:39094/island:21424/shore:39095	intron.RBFOX3	1.63991e-05	hyper
chr13	29067491	29070100	shore:30228/island:16526/shore:30229	promoter.FLT1/promoter.NA/CDS.FLT1/5UTR.FLT1/exon.FLT1/exon.NA/intron.FLT1	1.70592e-05	hyper
chr12	41085991	41087470	shore:28232/island:15432/shore:28233	promoter.CNTN1/5UTR.CNTN1/exon.CNTN1/intron.CNTN1	1.733e-05	hyper
chr9	88136401	88138510	shore:21684/island:11843/shore:21685	intergenic.NA	1.7534e-05	hyper
chr2	171673821	171675830	island:3564/shore:6591	CDS.GAD1/5UTR.GAD1/exon.GAD1/intron.GAD1	1.84515e-05	hyper
chr7	143579121	143581150	shelf:16086/shore:18556	intron.TCAF1	1.84515e-05	hyper
chr15	30483331	30485000	shore:32724/island:17891/shore:32725	1to5kb.LINC02249	1.84515e-05	hyper
chr3	79815351	79816880	shore:8659/island:4694/shore:8660	intron.ROBO1	1.85385e-05	hyper
chr8	139508511	139510200	shore:20490/island:11177/shore:20491	promoter.FAM135B/1to5kb.FAM135B/5UTR.FAM135B/exon.FAM135B/intron.FAM135B	1.85415e-05	hyper
chr7	1271881	1278870	island:8960	promoter.UNCX/CDS.UNCX/exon.UNCX/intron.UNCX/intergenic.NA	1.85417e-05	hyper
chr8	109093511	109096260	shore:20341/island:11099/shore:20342	promoter.RSPO2/1to5kb.RSPO2/CDS.RSPO2/5UTR.RSPO2/exon.RSPO2/intron.RSPO2	1.85579e-05	hyper
chr8	65281211	65284830	shore:19951/island:10892/shore:19952	promoter.MIR124-2HG/1to5kb.MIR124-2HG	1.85579e-05	hyper
chr20	37302351	37303870	shore:45419/island:25112/shore:45420	intergenic.NA	1.86091e-05	hyper
chr2	220312421	220314280	shore:7123/island:3862/shore:7124	1to5kb.SPEG/CDS.SPEG/5UTR.SPEG/exon.SPEG/intron.SPEG	1.8631e-05	hyper
chr7	71800441	71803060	shore:17605/island:9621/shore:17606	promoter.CALN1/5UTR.CALN1/exon.CALN1/intron.CALN1	1.86823e-05	hyper
chr1	119525481	119533260	shore:2741/island:1489/shore:2742/island:1490/shore:2743/island:1491/shore:2744	promoter.TBX15/1to5kb.TBX15/5UTR.TBX15/exon.TBX15/intron.TBX15	1.87737e-05	hyper
chr3	181428011	181429010	shelf:8397/shore:9519	promoter.SOX2/1to5kb.SOX2/intron.SOX2-OT	1.8921e-05	hyper
chr7	40174601	40176170	island:9397/shore:17192	promoter.MPLKIP/1to5kb.MPLKIP/CDS.SUGCT/exon.SUGCT/intron.SUGCT	1.8921e-05	hyper
chr6	99271811	99273810	shore:15319/island:8342/shore:15320	intergenic.NA	1.89754e-05	hyper
chr7	905321	908730	shore:16346/island:8906/shore:16347/shelf:14221	CDS.SUN1/exon.SUN1/exon.GET4/intron.SUN1/intron.GET4	1.91801e-05	hyper
chr15	88798241	88801830	shore:33758/island:18433/shore:33759	promoter.NTRK3/1to5kb.NTRK3/CDS.NTRK3/5UTR.NTRK3/exon.NTRK3/intron.NTRK3-AS1/intron.NTRK3	1.92599e-05	hyper
chr7	6703251	6704510	shore:16822/island:9190/shore:16823	promoter.NA/exon.NA/intron.NA	1.96023e-05	hyper
chr3	27772421	27773150	shore:7941	intergenic.NA	1.97565e-05	hyper
chr7	88387911	88389610	shore:17844/island:9747/shore:17845	promoter.ZNF804B/CDS.ZNF804B/5UTR.ZNF804B/exon.ZNF804B/intron.ZNF804B	1.98923e-05	hyper
chr8	49647251	49648730	shore:19821/island:10823/shore:19822	promoter.EFCAB1/CDS.EFCAB1/5UTR.EFCAB1/exon.EFCAB1/intron.EFCAB1	2.03361e-05	hyper
chr13	25945711	25947410	shore:30172/island:16492/shore:30173	promoter.ATP8A2/CDS.ATP8A2/5UTR.ATP8A2/exon.ATP8A2/intron.ATP8A2	2.04469e-05	hyper
chr11	125034911	125037660	island:15097/shore:27598	intron.PKNOX2	2.06998e-05	hyper
chr7	103628801	103631320	shore:18186/island:9929/shore:18187	promoter.RELN/1to5kb.RELN/CDS.RELN/5UTR.RELN/exon.RELN/intron.RELN	2.10482e-05	hyper
chr6	100441111	100442390	shore:15351/island:8363/shore:15352	promoter.MCHR2-AS1/promoter.MCHR2/5UTR.MCHR2/exon.MCHR2-AS1/exon.MCHR2/intron.MCHR2-AS1/intron.MCHR2	2.13081e-05	hyper
chr13	109146531	109149610	shore:30723/island:16795/shore:30724	intergenic.NA	2.16169e-05	hyper
chr14	76842281	76844150	shore:31881/island:17432/shore:31882	intron.ESRRB	2.21215e-05	hyper
chr15	83951571	83954570	shore:33706/island:18406/shore:33707	promoter.BNC1/1to5kb.BNC1/CDS.BNC1/5UTR.BNC1/exon.BNC1/intron.BNC1	2.21658e-05	hyper
chr7	8479961	8484360	shelf:14576/shore:16850/island:9204/shore:16851/island:9205/shore:16852	intron.NXPH1	2.22397e-05	hyper
chr20	61990241	61993810	shore:46042/island:25454/shore:46043	promoter.CHRNA4/1to5kb.CHRNA4/CDS.CHRNA4/5UTR.CHRNA4/exon.CHRNA4/intron.CHRNA4	2.26778e-05	hyper
chr8	105477991	105479650	shore:20329/island:11093/shore:20330	promoter.DPYS/CDS.DPYS/5UTR.DPYS/exon.DPYS/intron.DPYS	2.2746e-05	hyper
chr5	1885261	1888320	island:6495/shore:11935	promoter.IRX4/1to5kb.IRX4/5UTR.IRX4/exon.IRX4/intron.IRX4	2.28354e-05	hyper
chr3	128719431	128721550	shore:9042/island:4889/shore:9043	promoter.EFCC1/1to5kb.EFCC1/CDS.EFCC1/exon.EFCC1/intron.EFCC1	2.28598e-05	hyper
chr4	111532551	111534410	shore:11093/island:6016/shore:11094	intergenic.NA	2.30326e-05	hyper
chr4	8861161	8864060	island:5631/shore:10377	intergenic.NA	2.30941e-05	hyper
chr5	76249121	76250790	shore:12480/island:6787/shore:12481	CDS.CRHBP/exon.CRHBP/intron.CRHBP	2.32619e-05	hyper
chr1	200007211	200008340	shore:3722	promoter.NR5A2/1to5kb.NR5A2/exon.NR5A2/intron.NR5A2	2.32786e-05	hyper
chr7	1263191	1264410	shore:16427/island:8958/shore:16428	intergenic.NA	2.34752e-05	hyper
chr19	15121271	15122500	shore:42229/island:23295/shore:42230	promoter.CCDC105/promoter.SLC1A6/1to5kb.SLC1A6/CDS.CCDC105/CDS.SLC1A6/5UTR.CCDC105/5UTR.SLC1A6/exon.CCDC105/exon.SLC1A6/intron.CCDC105/intron.SLC1A6	2.34752e-05	hyper
chr10	102898871	102900770	shore:24531/island:13397/shore:24532/island:13398/shore:24533	intergenic.NA	2.3596e-05	hyper
chr17	27043671	27045680	shore:37520/island:20564/shore:37521	promoter.RAB34/promoter.NA/1to5kb.RPL23A/1to5kb.SNORD42B/1to5kb.SNORD4A/1to5kb.SNORD42A/1to5kb.PROCA1/CDS.RAB34/CDS.NA/5UTR.RAB34/5UTR.NA/exon.RAB34/exon.NA/intron.RAB34/intron.NA	2.39215e-05	hyper
chr9	21970181	21971540	shore:21124/island:11545/shore:21125	CDS.CDKN2A/exon.CDKN2A/intron.MTAP/intron.CDKN2A/3UTR.CDKN2A	2.40045e-05	hyper
chr1	2983631	2985880	shore:381/island:235	promoter.PRDM16/promoter.LINC00982/1to5kb.PRDM16/1to5kb.LINC00982/CDS.PRDM16/CDS.LINC00982/5UTR.PRDM16/5UTR.LINC00982/exon.PRDM16/exon.LINC00982/intron.PRDM16/intron.LINC00982	2.40045e-05	hyper
chr2	115419331	115420560	shore:6078/island:3286/shore:6079	intron.DPP10	2.4165e-05	hyper
chr10	23483561	23485010	shore:23507/island:12853/shore:23508	intergenic.NA	2.41824e-05	hyper
chr10	71331251	71333310	shore:24001/island:13107/shore:24002/island:13108	promoter.NEUROG3/promoter.NA/CDS.NEUROG3/CDS.NA/5UTR.NEUROG3/exon.NEUROG3/exon.NA/intron.NEUROG3/3UTR.NEUROG3/intergenic.NA	2.41824e-05	hyper
chr7	35300491	35302110	shore:17141/island:9371/shore:17142	intergenic.NA	2.47858e-05	hyper
chr4	156587991	156589560	shore:11419/island:6198/shore:11420	promoter.GUCY1A1/5UTR.GUCY1A1/exon.GUCY1A1/intron.GUCY1A1	2.56906e-05	hyper
chr19	15580081	15583210	shore:42279/island:23325/shore:42280/island:23326/shore:42281	1to5kb.RASAL3/CDS.PGLYRP2/exon.PGLYRP2/intron.PGLYRP2/3UTR.PGLYRP2	2.56906e-05	hyper
chr10	63211761	63213640	shore:23930/island:13071/shore:23931	promoter.NA/promoter.TMEM26/CDS.TMEM26/5UTR.TMEM26/exon.NA/exon.TMEM26/intron.NA/intron.TMEM26	2.57041e-05	hyper
chr1	18956091	18960060	shore:966/island:554/shore:967	promoter.PAX7/1to5kb.PAX7/CDS.PAX7/5UTR.PAX7/exon.PAX7/intron.PAX7	2.59209e-05	hyper
chr3	26663281	26665570	shore:7924/island:4298/shore:7925	promoter.LRRC3B/1to5kb.LRRC3B/5UTR.LRRC3B/exon.LRRC3B/intron.LRRC3B	2.6191e-05	hyper
chr10	94819501	94823500	shore:24318/island:13273/shore:24319	promoter.CYP26C1/1to5kb.CYP26C1/CDS.CYP26C1/exon.CYP26C1/intron.CYP26C1	2.6191e-05	hyper
chr1	207842371	207843570	shore:3917/island:2123/shore:3918	intron.CR1L	2.63515e-05	hyper
chr22	25677861	25679580	shore:47267/island:26134/shore:47268	promoter.NA/exon.NA/intron.NA	2.64101e-05	hyper
chr1	229566931	229570910	shore:4285/island:2326/shore:4286	promoter.ACTA1/1to5kb.ACTA1/CDS.ACTA1/5UTR.ACTA1/exon.ACTA1/intron.ACTA1/3UTR.ACTA1/intergenic.NA	2.72088e-05	hyper
chr15	79381491	79384410	shore:33617/island:18361/shore:33618	promoter.RASGRF1/1to5kb.RASGRF1/CDS.RASGRF1/5UTR.RASGRF1/exon.RASGRF1/intron.RASGRF1	2.73198e-05	hyper
chr17	8905981	8908290	shore:37145/island:20364/shore:37146	intergenic.NA	2.73198e-05	hyper
chr11	49229451	49230920	shore:26173/island:14328/shore:26174	promoter.FOLH1/CDS.FOLH1/5UTR.FOLH1/exon.FOLH1/intron.FOLH1	2.81519e-05	hyper
chr2	144693971	144695500	shore:6427/island:3476/shore:6428	intergenic.NA	2.81519e-05	hyper
chr6	100914961	100916110	island:8374/shore:15367/island:8375/shore:15368	1to5kb.SIM1	2.8755e-05	hyper
chr14	36972901	36974000	shore:31354/island:17152/shore:31355	intron.SFTA3	2.8755e-05	hyper
chr6	108485341	108490510	shore:15431/island:8410	promoter.NR2E1/1to5kb.NR2E1/CDS.NR2E1/5UTR.NR2E1/exon.NR2E1/intron.NR2E1	2.89978e-05	hyper
chr6	28414581	28415390	inter:5968	1to5kb.ZSCAN23	2.96281e-05	hyper
chr3	68980181	68982730	shore:8588/island:4657/shore:8589	promoter.FAM19A4/5UTR.FAM19A4/exon.FAM19A4/intron.FAM19A4	2.98357e-05	hyper
chr1	146548351	146552900	shore:2874/island:1563/shore:2875/island:1564/shore:2876/island:1565/shore:2877/island:1566/shore:2878	promoter.NA/1to5kb.NA/exon.NA/intergenic.NA	2.99836e-05	hyper
chr3	75667451	75669320	shore:8641/island:4684/shore:8642	intergenic.NA	3.04741e-05	hyper
chr8	72753561	72755320	shore:20022/island:10931/shore:20023	promoter.MSC-AS1/1to5kb.MSC-AS1/CDS.MSC/exon.MSC/intron.MSC/3UTR.MSC	3.14023e-05	hyper
chr1	217307181	217312130	shore:4035/island:2187/shore:4036/island:2188/shore:4037/island:2189/shore:4038	promoter.ESRRG/1to5kb.ESRRG/5UTR.ESRRG/exon.ESRRG/intron.ESRRG	3.22055e-05	hyper
chr3	134514031	134517140	shore:9145/island:4943/shore:9146	promoter.EPHB1/CDS.EPHB1/5UTR.EPHB1/exon.EPHB1/intron.EPHB1	3.23245e-05	hyper
chr5	177410701	177413320	shore:13713/island:7466/shore:13714/island:7467/shore:13715	intergenic.NA	3.28073e-05	hyper
chr13	25319311	25322470	shore:30150/island:16481/shore:30151	intergenic.NA	3.29988e-05	hyper
chr12	45443631	45445680	shore:28265/island:15449/shore:28266	promoter.DBX2/CDS.DBX2/5UTR.DBX2/exon.DBX2/intron.DBX2	3.30998e-05	hyper
chr12	127939701	127941230	shore:29684/island:16216/shore:29685	intergenic.NA	3.34555e-05	hyper
chr19	51169281	51172770	shore:44179/island:24423/shore:44180	CDS.SHANK1/exon.SHANK1/intron.SHANK1	3.36439e-05	hyper
chr20	24449271	24452260	shore:45129/island:24957/shore:45130	promoter.SYNDIG1/5UTR.SYNDIG1/exon.SYNDIG1/intron.SYNDIG1	3.46704e-05	hyper
chr1	70032851	70034800	shore:2250/island:1230/shore:2251	promoter.LRRC7/CDS.LRRC7/5UTR.LRRC7/exon.LRRC7/intron.LRRC7	3.48762e-05	hyper
chr12	8170231	8172080	shore:27971/island:15295/shore:27972	intergenic.NA	3.48762e-05	hyper
chr22	19016551	19018160	shore:46970/island:25975/shore:46971	intron.DGCR5	3.48762e-05	hyper
chr2	45164281	45165270	shore:5171/island:2801	1to5kb.SIX3	3.48762e-05	hyper
chr11	1767481	1770980	shore:25486/island:13953/shore:25487	CDS.IFITM10/exon.IFITM10/intron.MOB2/intron.IFITM10	3.49446e-05	hyper
chr9	3180441	3182010	shore:20974/island:11467/shore:20975	intergenic.NA	3.52254e-05	hyper
chr7	128555361	128556950	island:10032/shore:18382	1to5kb.KCP/intergenic.NA	3.52254e-05	hyper
chr4	154709201	154714550	shore:11395/island:6184/shore:11396/island:6185/shore:11397/island:6186/shore:11398	promoter.SFRP2/1to5kb.SFRP2/CDS.SFRP2/5UTR.SFRP2/exon.SFRP2/intron.SFRP2	3.5489e-05	hyper
chr8	65710641	65712050	shore:19962/island:10900/shore:19963	promoter.CYP7B1/CDS.CYP7B1/5UTR.CYP7B1/exon.CYP7B1/intron.CYP7B1	3.58661e-05	hyper
chr20	34187161	34191230	shore:45325/island:25063/shore:45326	promoter.NA/1to5kb.NA/CDS.NA/5UTR.NA/exon.NA/intron.NA	3.66647e-05	hyper
chr6	10881201	10884880	shore:14101/island:7688/shore:14102/island:7689/shore:14103	promoter.GCM2/1to5kb.SYCP2L/1to5kb.GCM2/CDS.GCM2/5UTR.GCM2/exon.GCM2/intron.SYCP2L/intron.GCM2	3.66647e-05	hyper
chr20	25057991	25059050	shore:45137/island:24961/shore:45138	CDS.VSX1/exon.VSX1/intron.VSX1	3.68512e-05	hyper
chr16	10133141	10133830	inter:14152	intron.GRIN2A	3.68512e-05	hyper
chr20	2780111	2781710	shore:44873/island:24814/shore:44874	promoter.CPXM1/CDS.CPXM1/5UTR.CPXM1/exon.CPXM1/intron.CPXM1	3.68512e-05	hyper
chr16	86543701	86545500	island:19831/shore:36223	promoter.FOXF1/1to5kb.FENDRR/CDS.FOXF1/5UTR.FOXF1/exon.FOXF1/intron.FOXF1	3.72233e-05	hyper
chr4	1395761	1402710	shore:10016/island:5427/shore:10017/island:5428/shore:10018	intergenic.NA	3.73445e-05	hyper
chr1	154297631	154298740	shore:3160/island:1723/shore:3161	promoter.ATP8B2/1to5kb.ATP8B2/5UTR.ATP8B2/exon.AQP10/exon.ATP8B2/intron.ATP8B2/3UTR.AQP10	3.76387e-05	hyper
chr10	102893291	102897130	shore:24529/island:13395/shore:24530/island:13396/shore:24531	1to5kb.TLX1NB/CDS.TLX1/exon.TLX1/intron.TLX1/3UTR.TLX1	3.82352e-05	hyper
chr3	147108241	147112470	shore:9283/island:5017/shore:9284	promoter.ZIC4/1to5kb.ZIC4/CDS.ZIC4/exon.ZIC4/intron.ZIC4	3.8279e-05	hyper
chr13	102067841	102069560	shore:30691/island:16778/shore:30692	promoter.NALCN/5UTR.NALCN/exon.NALCN/intron.NALCN	3.88369e-05	hyper
chr1	177139791	177140960	shore:3576/island:1945/shore:3577	promoter.BRINP2/5UTR.BRINP2/exon.BRINP2/intron.BRINP2	3.90104e-05	hyper
chr7	30951301	30952200	inter:7023	promoter.AQP1/CDS.AQP1/5UTR.AQP1/exon.AQP1/intron.AQP1	3.93828e-05	hyper
chr8	41165531	41167760	shore:19721/island:10769/shore:19722	promoter.SFRP1/CDS.SFRP1/5UTR.SFRP1/exon.SFRP1/intron.SFRP1	3.94479e-05	hyper
chr11	69631771	69634960	shore:26870/island:14716/shore:26871	promoter.FGF3/CDS.FGF3/5UTR.FGF3/exon.FGF3/intron.FGF3	3.98514e-05	hyper
chr8	117950141	117951250	shore:20375/island:11117/shore:20376	promoter.AARD/promoter.NA/CDS.AARD/5UTR.AARD/exon.AARD/exon.NA/intron.AARD	3.98514e-05	hyper
chr22	19135881	19139140	shore:46977/island:25979/shore:46978	promoter.GSC2/1to5kb.ESS2/1to5kb.GSC2/CDS.GSC2/exon.GSC2/intron.GSC2	3.98841e-05	hyper
chr2	50573181	50575140	shore:5237/island:2838/shore:5238	promoter.NRXN1/CDS.NRXN1/5UTR.NRXN1/exon.NRXN1/intron.NRXN1	4.03663e-05	hyper
chr11	43602221	43605130	shore:26025/island:14247/shore:26026	promoter.MIR129-2/promoter.NA/1to5kb.NA/exon.MIR129-2/exon.NA	4.04936e-05	hyper
chr20	58179561	58181060	shore:45819/island:25325/shore:45820	promoter.PHACTR3/CDS.PHACTR3/5UTR.PHACTR3/exon.PHACTR3/intron.PHACTR3	4.05447e-05	hyper
chr7	150033541	150035030	shelf:16170	promoter.NA/CDS.LRRC61/CDS.NA/5UTR.LRRC61/exon.LRRC61/exon.NA/intron.LRRC61/3UTR.LRRC61	4.1459e-05	hyper
chr9	140770991	140773970	shore:23145/island:12658/shore:23146	promoter.CACNA1B/1to5kb.CACNA1B/CDS.CACNA1B/5UTR.CACNA1B/exon.CACNA1B/intron.CACNA1B/intron.NA	4.16094e-05	hyper
chr13	88323271	88327220	shore:30595/island:16724/shore:30596/island:16725/shore:30597	promoter.SLITRK5/promoter.NA/promoter.MIR4500HG/1to5kb.SLITRK5/1to5kb.NA/1to5kb.MIR4500HG/CDS.NA/5UTR.SLITRK5/5UTR.NA/exon.SLITRK5/exon.NA/intron.SLITRK5/intron.NA	4.20456e-05	hyper
chr14	38066581	38068710	shore:31383/island:17174	1to5kb.FOXA1	4.20456e-05	hyper
chr19	58094451	58096060	shore:44647/island:24690/shore:44648	promoter.ZIK1/1to5kb.ZIK1/1to5kb.ZNF416/CDS.ZIK1/5UTR.ZIK1/exon.ZIK1/intron.ZIK1	4.2546e-05	hyper
chr21	38063981	38067280	shore:46423/island:25673/shore:46424	1to5kb.SIM2/intergenic.NA	4.2697e-05	hyper
chr3	137478911	137481530	shore:9161/island:4951/shore:9162/island:4952/shore:9163	1to5kb.SOX14	4.35273e-05	hyper
chr5	175084671	175086030	shore:13583/island:7395/shore:13584	promoter.HRH2/5UTR.HRH2/exon.HRH2/intron.HRH2	4.3961e-05	hyper
chr14	57263791	57266240	shore:31542/island:17256/shore:31543	intergenic.NA	4.43163e-05	hyper
chr11	30605131	30608400	shore:25927/island:14191/shore:25928/island:14192/shore:25929	promoter.MPPED2/1to5kb.MPPED2/5UTR.MPPED2/exon.MPPED2/intron.MPPED2	4.45539e-05	hyper
chr14	60975181	60978510	shore:31602/island:17288/shore:31603	promoter.SIX6/CDS.SIX6/5UTR.SIX6/exon.SIX6/intron.SIX6/3UTR.SIX6	4.51914e-05	hyper
chr19	3785361	3786910	shore:41230/island:22709/shore:41231	promoter.MATK/5UTR.MATK/exon.MATK/intron.MATK	4.60812e-05	hyper
chr4	185939341	185943030	island:6296/shore:11603	promoter.HELT/CDS.HELT/5UTR.HELT/exon.HELT/intron.HELT/3UTR.HELT/intergenic.NA	4.69754e-05	hyper
chr1	153233161	153234640	inter:1245	promoter.NA/CDS.LOR/CDS.NA/5UTR.LOR/exon.LOR/exon.NA/intron.LOR/3UTR.LOR/intergenic.NA	4.75291e-05	hyper
chr3	137481641	137482540	shore:9163	promoter.SOX14/1to5kb.SOX14	4.84432e-05	hyper
chr4	777771	782690	shore:9899/island:5351/shore:9900/shelf:8724	1to5kb.LOC100129917/CDS.CPLX1/exon.CPLX1/intron.CPLX1/3UTR.CPLX1	4.878e-05	hyper
chr4	126236131	126239240	island:6071/shore:11197	promoter.FAT4/1to5kb.FAT4/CDS.FAT4/exon.FAT4	4.89793e-05	hyper
chr1	203044391	203045980	shore:3810/island:2068/shore:3811	CDS.PPFIA4/exon.PPFIA4/intron.PPFIA4/3UTR.PPFIA4	4.99447e-05	hyper
chr2	63278321	63282080	island:2888/shore:5332/island:2889/shore:5333	1to5kb.LOC100132215/CDS.OTX1/5UTR.OTX1/exon.OTX1/intron.OTX1	5.07832e-05	hyper
chr2	209270891	209272390	shore:6968/island:3777/shore:6969	promoter.PTH2R/CDS.PTH2R/5UTR.PTH2R/exon.PTH2R/intron.PTH2R	5.07958e-05	hyper
chr10	124901441	124903650	shore:24864/island:13578/shore:24865	1to5kb.HMX2/intergenic.NA	5.0971e-05	hyper
chr7	156870541	156871570	shore:18866/island:10299/shore:18867	intergenic.NA	5.0971e-05	hyper
chr21	34394681	34400750	shore:46357/island:25639/shore:46358	promoter.OLIG2/promoter.NA/1to5kb.OLIG2/1to5kb.NA/CDS.OLIG2/CDS.NA/5UTR.OLIG2/exon.OLIG2/exon.NA/intron.OLIG2/3UTR.OLIG2	5.0971e-05	hyper
chr12	79258121	79259230	inter:11879	promoter.SYT1/5UTR.SYT1/exon.SYT1/intron.SYT1	5.13408e-05	hyper
chr7	96647141	96648520	shore:17917	1to5kb.DLX6-AS1/intergenic.NA	5.1387e-05	hyper
chr20	57088991	57090560	shore:45781/island:25304/shore:45782	promoter.APCDD1L-DT/promoter.APCDD1L/1to5kb.APCDD1L-DT/CDS.APCDD1L/5UTR.APCDD1L/exon.APCDD1L-DT/exon.APCDD1L/intron.APCDD1L	5.14334e-05	hyper
chr4	122685031	122686950	shore:11167/island:6056/shore:11168	promoter.PP12613/promoter.TMEM155/5UTR.TMEM155/exon.PP12613/exon.TMEM155/intron.TMEM155	5.17439e-05	hyper
chr14	58331381	58333420	shore:31554/island:17263/shore:31555	promoter.SLC35F4/CDS.SLC35F4/5UTR.SLC35F4/exon.SLC35F4/intron.SLC35F4	5.17439e-05	hyper
chr8	114444561	114446220	shore:20362/island:11110/shore:20363	intron.CSMD3	5.20343e-05	hyper
chr12	113494131	113496510	shore:29283/island:15995/shore:29284	promoter.DTX1/1to5kb.DTX1/CDS.DTX1/5UTR.DTX1/exon.DTX1/intron.DTX1	5.27291e-05	hyper
chr6	19691471	19692510	shore:14179/island:7728/shore:14180	intergenic.NA	5.31194e-05	hyper
chr7	96631101	96632150	shore:17912/island:9781/shore:17913	1to5kb.DLX6/intron.DLX6-AS1	5.35966e-05	hyper
chr10	118898941	118901010	shore:24767/island:13526/shore:24768	1to5kb.VAX1	5.41571e-05	hyper
chr3	27764881	27766670	shore:7938/island:4307/shore:7939	promoter.EOMES/1to5kb.EOMES	5.51916e-05	hyper
chr22	39851911	39854330	shore:47642/island:26329/shore:47643/island:26330/shore:47644	promoter.MGAT3/1to5kb.MGAT3/5UTR.MGAT3/exon.MGAT3/intron.MGAT3	5.53517e-05	hyper
chr9	95996421	95997990	inter:8988	promoter.WNK2/CDS.WNK2/5UTR.WNK2/exon.WNK2/intron.WNK2	5.54325e-05	hyper
chr9	137978511	137981830	shore:22786/island:12434/shore:22787/island:12435/shore:22788	promoter.OLFM1/1to5kb.OLFM1/CDS.OLFM1/5UTR.OLFM1/exon.OLFM1/intron.OLFM1	5.55599e-05	hyper
chr11	14994921	14996390	shore:25780/island:14110/shore:25781	1to5kb.CALCA	5.56206e-05	hyper
chr17	75367811	75370890	shore:39011/island:21382/shore:39012	promoter.SEPT9/1to5kb.SEPT9/CDS.SEPT9/5UTR.SEPT9/exon.SEPT9/intron.SEPT9	5.69452e-05	hyper
chr2	40678221	40679940	shore:5118/island:2771/shore:5119	promoter.SLC8A1/5UTR.SLC8A1/exon.SLC8A1/intron.SLC8A1	5.75291e-05	hyper
chr7	156812641	156814100	island:10297	intergenic.NA	5.7631e-05	hyper
chr12	114881361	114883650	shore:29327/island:16022/shore:29328	intergenic.NA	5.80537e-05	hyper
chr14	96341941	96343900	shore:32091/island:17543/shore:32092	promoter.TUNAR/1to5kb.TUNAR/exon.TUNAR/intron.TUNAR	5.82296e-05	hyper
chr7	145812501	145814430	shore:18568/island:10129/shore:18569	promoter.CNTNAP2/CDS.CNTNAP2/5UTR.CNTNAP2/exon.CNTNAP2/intron.CNTNAP2	5.83466e-05	hyper
chr3	157811751	157814000	shore:9379/island:5068/shore:9380	exon.SHOX2/3UTR.SHOX2/intergenic.NA	5.90707e-05	hyper
chr11	44330211	44333860	shore:26040/island:14256/shore:26041/island:14257/shore:26042	promoter.ALX4/1to5kb.ALX4/CDS.ALX4/5UTR.ALX4/exon.ALX4/intron.ALX4	5.90707e-05	hyper
chr4	134071191	134074240	shore:11239/island:6102/shore:11240	promoter.NA/1to5kb.NA/CDS.PCDH10/5UTR.PCDH10/exon.PCDH10/intron.PCDH10/3UTR.PCDH10	5.96643e-05	hyper
chr7	149410361	149412690	shore:18624/island:10158/shore:18625	promoter.KRBA1/1to5kb.KRBA1/5UTR.KRBA1/exon.KRBA1/intron.KRBA1	5.96643e-05	hyper
chr11	20180291	20183250	shore:25874/island:14161/shore:25875	promoter.DBX1/1to5kb.DBX1/CDS.DBX1/5UTR.DBX1/exon.DBX1/intron.DBX1	5.96643e-05	hyper
chr9	37001981	37003280	shore:21323/island:11652/shore:21324	promoter.PAX5/CDS.PAX5/5UTR.PAX5/exon.PAX5/intron.PAX5/3UTR.PAX5	5.96643e-05	hyper
chr1	13839211	13840530	shore:787/island:458	promoter.LRRC38/CDS.LRRC38/5UTR.LRRC38/exon.LRRC38/intron.LRRC38	5.97512e-05	hyper
chr7	19811831	19813600	shore:16905/island:9235/shore:16906	promoter.TMEM196/1to5kb.TMEM196/CDS.TMEM196/5UTR.TMEM196/exon.TMEM196/intron.TMEM196	5.97512e-05	hyper
chr12	131781811	131784920	shore:29768/island:16260/shore:29769	promoter.NA/1to5kb.NA/5UTR.NA/exon.NA/intron.NA	5.99058e-05	hyper
chr18	12253221	12255720	shore:39725/island:21792/shore:39726	promoter.CIDEA/1to5kb.CIDEA/CDS.CIDEA/5UTR.CIDEA/exon.CIDEA/intron.CIDEA	6.02921e-05	hyper
chr7	1708661	1711260	island:9003/shore:16499	intergenic.NA	6.17699e-05	hyper
chr13	26623521	26626580	shore:30178/island:16495/shore:30179	promoter.SHISA2/1to5kb.SHISA2/CDS.SHISA2/5UTR.SHISA2/exon.SHISA2/intron.SHISA2	6.2053e-05	hyper
chr14	101922811	101926260	shore:32203/island:17603/shore:32204	intergenic.NA	6.22081e-05	hyper
chr5	168726651	168728870	shore:13476/island:7334/shore:13477	promoter.SLIT3/CDS.SLIT3/5UTR.SLIT3/exon.SLIT3/intron.SLIT3	6.22081e-05	hyper
chr3	140769351	140772100	shore:9223/island:4986/shore:9224	promoter.SPSB4/1to5kb.SPSB4/5UTR.SPSB4/exon.SPSB4/intron.SPSB4	6.28134e-05	hyper
chr6	118227781	118230100	shore:15541/island:8469/shore:15542	promoter.SLC35F1/CDS.SLC35F1/5UTR.SLC35F1/exon.SLC35F1/intron.SLC35F1	6.28134e-05	hyper
chr4	156128931	156130500	shore:11415/island:6196/shore:11416	promoter.NPY2R/1to5kb.NPY2R/1to5kb.NA/5UTR.NPY2R/exon.NPY2R/intron.NPY2R	6.33041e-05	hyper
chr14	42075161	42077990	shore:31406/island:17186/shore:31407	promoter.LRFN5/1to5kb.LRFN5/5UTR.LRFN5/exon.LRFN5/intron.LRFN5	6.37508e-05	hyper
chr11	105480611	105481880	shore:27281/island:14932/shore:27282	promoter.GRIA4/CDS.GRIA4/5UTR.GRIA4/exon.GRIA4/intron.GRIA4	6.39537e-05	hyper
chr11	57404781	57406400	inter:10741	promoter.NA/1to5kb.NA/1to5kb.MIR130A/exon.NA/intron.NA	6.42956e-05	hyper
chr4	174449301	174453210	shore:11518/island:6251/shore:11519/island:6252/shore:11520	promoter.HAND2-AS1/promoter.HAND2/1to5kb.HAND2-AS1/1to5kb.HAND2/CDS.HAND2/5UTR.HAND2/exon.HAND2-AS1/exon.HAND2/intron.HAND2-AS1/intron.HAND2	6.47027e-05	hyper
chr9	100619661	100621000	shore:21941/island:11981/shore:21942	intergenic.NA	6.47027e-05	hyper
chr4	1163871	1166440	shore:9977/island:5402	promoter.SPON2/1to5kb.SPON2/CDS.SPON2/5UTR.SPON2/exon.SPON2/intron.SPON2/3UTR.SPON2	6.47027e-05	hyper
chr1	50513351	50514640	shore:1997/island:1096/shore:1998	promoter.ELAVL4/CDS.ELAVL4/5UTR.ELAVL4/exon.ELAVL4/intron.ELAVL4	6.47892e-05	hyper
chr22	19745791	19746690	shore:47008/island:25997/shore:47009	intron.TBX1	6.47892e-05	hyper
chr18	904211	909860	shore:39593/island:21722/shore:39594	promoter.ADCYAP1/CDS.ADCYAP1/5UTR.ADCYAP1/exon.ADCYAP1/intron.ADCYAP1/3UTR.ADCYAP1	6.51234e-05	hyper
chr2	29337621	29339240	shore:5031/island:2726/shore:5032	promoter.CLIP4/1to5kb.CLIP4/5UTR.CLIP4/exon.CLIP4/intron.CLIP4	6.53537e-05	hyper
chr9	129385791	129389570	shore:22334/island:12193/shore:22335	intron.LMX1B	6.55454e-05	hyper
chr2	232790201	232791130	island:3942	promoter.NPPC/CDS.NPPC/5UTR.NPPC/exon.NPPC/intron.NPPC	6.55613e-05	hyper
chr10	16561111	16564100	shore:23441/island:12816/shore:23442	promoter.C1QL3/CDS.C1QL3/5UTR.C1QL3/exon.C1QL3/intron.C1QL3	6.70324e-05	hyper
chr20	61884421	61886940	shore:46020/island:25440/shore:46021	promoter.FLJ16779/promoter.NKAIN4/1to5kb.NKAIN4/CDS.FLJ16779/CDS.NKAIN4/5UTR.FLJ16779/5UTR.NKAIN4/exon.FLJ16779/exon.NKAIN4/intron.NKAIN4/3UTR.FLJ16779	6.78676e-05	hyper
chr20	4802831	4804460	shore:44955/island:24859/shore:44956	promoter.RASSF2/5UTR.RASSF2/exon.RASSF2/intron.RASSF2	6.78911e-05	hyper
chr16	55512571	55513830	shore:35604/island:19498/shore:35605	promoter.MMP2/1to5kb.MMP2/CDS.MMP2/5UTR.MMP2/exon.MMP2/intron.MMP2	6.79685e-05	hyper
chr1	228193781	228196600	shore:4210/island:2284/shore:4211	promoter.WNT3A/CDS.WNT3A/5UTR.WNT3A/exon.WNT3A/intron.WNT3A	6.84847e-05	hyper
chr4	166794261	166796470	shore:11468/island:6223/shore:11469	promoter.TLL1/CDS.TLL1/5UTR.TLL1/exon.TLL1/intron.TLL1	6.90334e-05	hyper
chr20	26188341	26190820	shore:45162/island:24975/shore:45163	promoter.MIR663AHG/promoter.MIR663A/1to5kb.MIR663A/exon.MIR663AHG/exon.MIR663A/intron.MIR663AHG	6.92843e-05	hyper
chr17	42732231	42736080	shore:38122/island:20896/shore:38123	promoter.MEIOC/1to5kb.MEIOC/CDS.MEIOC/5UTR.MEIOC/exon.MEIOC/intron.MEIOC	7.04204e-05	hyper
chr13	70681411	70682710	shore:30538/island:16693/shore:30539	promoter.KLHL1/CDS.KLHL1/5UTR.KLHL1/exon.ATXN8OS/exon.KLHL1/intron.ATXN8OS	7.16778e-05	hyper
chr6	134210061	134211620	shore:15641/island:8521/shore:15642	promoter.TCF21/promoter.NA/1to5kb.NA/CDS.TCF21/5UTR.TCF21/exon.TCF21/exon.NA/intron.TCF21	7.25271e-05	hyper
chr9	104499071	104500760	shore:22006/island:12015	CDS.GRIN3A/5UTR.GRIN3A/exon.GRIN3A/intron.GRIN3A	7.25271e-05	hyper
chr1	38509861	38512460	shore:1651/island:915	promoter.POU3F1/CDS.POU3F1/5UTR.POU3F1/exon.POU3F1/3UTR.POU3F1	7.3747e-05	hyper
chr22	32571661	32573390	shore:47437/island:26224/shore:47438	intergenic.NA	7.38981e-05	hyper
chr5	178367301	178369630	shore:13757/island:7489/shore:13758	promoter.ZNF454/CDS.ZNF454/5UTR.ZNF454/exon.ZNF454/intron.ZNF454	7.44568e-05	hyper
chr17	59485171	59486270	shore:38617/island:21170/shore:38618	1to5kb.C17orf82/CDS.TBX2/exon.TBX2/intron.TBX2/3UTR.TBX2	7.44992e-05	hyper
chr5	87973661	87974780	shore:12582/island:6842/shore:12583	promoter.LINC00461/1to5kb.LINC00461/exon.LINC00461/intron.LINC00461	7.64568e-05	hyper
chr10	118926761	118927810	shore:24771/island:13529	promoter.MIR3663/exon.MIR3663/intron.NA	7.64951e-05	hyper
chr1	63784121	63787590	island:1195	1to5kb.FOXD3/1to5kb.LINC00466	7.76228e-05	hyper
chr13	112715011	112718160	shore:30821/island:16848/shore:30822/island:16849/shore:30823	1to5kb.SOX1/intergenic.NA	7.79711e-05	hyper
chr5	54517391	54519920	shore:12269/island:6674/shore:12270	CDS.MCIDAS/exon.MCIDAS/intron.MCIDAS	7.81488e-05	hyper
chr1	244079841	244081390	shore:4447/island:2411/shore:4448	promoter.LOC339529/exon.LOC339529/intron.LOC339529	7.86025e-05	hyper
chr8	48099931	48101580	shore:19792/island:10808/shore:19793	promoter.LOC100287846/exon.LOC100287846	7.89428e-05	hyper
chr10	133998521	134001660	shore:25030/island:13668/shore:25031	promoter.DPYSL4/1to5kb.DPYSL4/CDS.DPYSL4/5UTR.DPYSL4/exon.DPYSL4/intron.DPYSL4	7.96461e-05	hyper
chr22	43738241	43740420	shore:47819/island:26422/shore:47820	promoter.SCUBE1/1to5kb.SCUBE1/CDS.SCUBE1/5UTR.SCUBE1/exon.SCUBE1/intron.SCUBE1	8.14411e-05	hyper
chr16	20084311	20086130	shore:34963/island:19155/shore:34964	promoter.GPR139/1to5kb.GPR139/CDS.GPR139/5UTR.GPR139/exon.GPR139/intron.GPR139	8.17055e-05	hyper
chr2	233250961	233253830	shore:7278/island:3948/shore:7279	promoter.ECEL1P2/1to5kb.ECEL1P2/CDS.ECEL1P2/5UTR.ECEL1P2/exon.ECEL1P2/3UTR.ECEL1P2	8.17055e-05	hyper
chr11	89596751	89599120	shore:27177/island:14877/shore:27178/island:14878/shore:27179	intergenic.NA	8.17055e-05	hyper
chr7	120968591	120969750	shore:18288/island:9981	promoter.WNT16/1to5kb.WNT16/CDS.WNT16/5UTR.WNT16/exon.WNT16/intron.WNT16	8.22141e-05	hyper
chr12	113514851	113516250	shore:29285/island:15996/shore:29286	CDS.DTX1/exon.DTX1/intron.DTX1	8.23979e-05	hyper
chr11	24517971	24519050	shore:25902/island:14176/shore:25903	promoter.LUZP2/CDS.LUZP2/5UTR.LUZP2/exon.LUZP2/intron.LUZP2	8.24313e-05	hyper
chr17	37365821	37366810	shore:37835/island:20737/shore:37836	exon.STAC2/3UTR.STAC2/intergenic.NA	8.58484e-05	hyper
chr22	44286761	44288360	shore:47832/island:26429/shore:47833	promoter.PNPLA5/CDS.PNPLA5/5UTR.PNPLA5/exon.PNPLA5/intron.PNPLA5	8.66207e-05	hyper
chr11	20622431	20623700	shore:25882/island:14166/shore:25883	CDS.SLC6A5/5UTR.SLC6A5/exon.SLC6A5/intron.SLC6A5	8.66207e-05	hyper
chr15	32638091	32639750	shore:32770/island:17916/shore:32771	1to5kb.NA	8.66207e-05	hyper
chr1	58715011	58716570	shore:2136/island:1170/shore:2137	promoter.DAB1/5UTR.DAB1/exon.DAB1/intron.DAB1	8.67103e-05	hyper
chr12	132144891	132148100	shore:29778/island:16265/shore:29779	intergenic.NA	8.68542e-05	hyper
chr11	101453041	101454970	shore:27259/island:14921/shore:27260	promoter.TRPC6/CDS.TRPC6/5UTR.TRPC6/exon.TRPC6/intron.TRPC6	8.74547e-05	hyper
chr3	197807961	197808990	island:5309/shore:9831	promoter.ANKRD18DP/1to5kb.ANKRD18DP	8.74547e-05	hyper
chr13	112707421	112709020	shore:30819/island:16846/shore:30820	intergenic.NA	8.90719e-05	hyper
chr9	99982931	99985250	shore:21920/island:11969/shore:21921	intron.NA	9.04963e-05	hyper
chr12	114840631	114844580	shore:29320/island:16017/shore:29321/island:16018/shore:29322	promoter.TBX5/1to5kb.TBX5-AS1/1to5kb.TBX5/CDS.TBX5/5UTR.TBX5/exon.TBX5/intron.TBX5	9.06281e-05	hyper
chr10	57387171	57388740	shore:23899/island:13055/shore:23900	promoter.PCDH15/1to5kb.PCDH15/5UTR.PCDH15/exon.PCDH15/intron.PCDH15	9.07791e-05	hyper
chr6	36806631	36807440	shore:14771/island:8052/shore:14772	promoter.CPNE5/CDS.CPNE5/5UTR.CPNE5/exon.CPNE5/intron.CPNE5	9.0908e-05	hyper
chr21	36040511	36043430	shore:46394/island:25658/shore:46395	promoter.CLIC6/1to5kb.CLIC6/CDS.CLIC6/exon.CLIC6/intron.CLIC6	9.12271e-05	hyper
chr7	35292741	35295530	shore:17139/island:9369/shore:17140	promoter.TBX20/1to5kb.TBX20/CDS.TBX20/5UTR.TBX20/exon.TBX20/intron.TBX20	9.16077e-05	hyper
chr15	79723771	79725930	shore:33624/island:18365/shore:33625	promoter.MINAR1/1to5kb.MINAR1/5UTR.MINAR1/exon.MINAR1/intron.MINAR1	9.16077e-05	hyper
chr11	122851631	122852810	shore:27544/island:15067/shore:27545	promoter.BSX/CDS.BSX/exon.BSX/intron.BSX	9.16077e-05	hyper
chr5	139143511	139144500	shore:13039/island:7086/shore:13040	intergenic.NA	9.25414e-05	hyper
chr10	103999931	104001080	shore:24584/island:13428	1to5kb.GBF1/1to5kb.NA/intron.PITX3	9.25414e-05	hyper
chr16	3232101	3234660	shore:34606/island:18954/shore:34607	promoter.NA/1to5kb.NA/exon.NA	9.25977e-05	hyper
chr9	139084391	139086360	shore:22867/island:12481/shore:22868	promoter.NA/CDS.NA/5UTR.NA/exon.NA/3UTR.NA/intergenic.NA	9.5242e-05	hyper
chr11	88241361	88242850	shore:27168/island:14872/shore:27169	CDS.GRM5/exon.GRM5-AS1/exon.GRM5/intron.GRM5-AS1/intron.GRM5/3UTR.GRM5	9.55329e-05	hyper
chr11	66187131	66189880	shore:26669/island:14606/shore:26670	promoter.NPAS4/1to5kb.NPAS4/CDS.NPAS4/5UTR.NPAS4/exon.NPAS4/intron.NPAS4	9.61208e-05	hyper
chr8	65288971	65293640	shore:19953/island:10894/shore:19954/shelf:17271	promoter.NA/promoter.MIR124-2/1to5kb.NA/1to5kb.MIR124-2/CDS.MIR124-2HG/exon.MIR124-2HG/exon.NA/exon.MIR124-2/intron.MIR124-2HG/intron.NA/3UTR.MIR124-2HG	9.63714e-05	hyper
chr14	60981221	60983150	shore:31603/island:17289/shore:31604	intergenic.NA	9.75777e-05	hyper
chr2	11051841	11054280	shore:4774/island:2587/shore:4775/island:2588/shore:4776	promoter.KCNF1/CDS.KCNF1/5UTR.KCNF1/exon.KCNF1/3UTR.KCNF1	9.76196e-05	hyper
chr13	43147961	43149590	shore:30370/island:16602/shore:30371	promoter.TNFSF11/CDS.TNFSF11/5UTR.TNFSF11/exon.TNFSF11/intron.TNFSF11	9.76196e-05	hyper
chr6	26720551	26724460	inter:5940	promoter.NA/1to5kb.NA/exon.NA/intergenic.NA	9.82495e-05	hyper
chr1	1469901	1481320	shore:169/island:109/shore:170/island:110/shore:171/island:111/shore:172/island:112/shore:173/shelf:92/inter:32	promoter.TMEM240/1to5kb.TMEM240/CDS.TMEM240/CDS.SSU72/5UTR.TMEM240/exon.ATAD3A/exon.NA/exon.TMEM240/exon.SSU72/intron.TMEM240/intron.SSU72/3UTR.ATAD3A/3UTR.TMEM240/3UTR.SSU72/intergenic.NA	9.82495e-05	hyper
chr10	103043701	103044650	shore:24544/island:13405/shore:24545	intergenic.NA	9.85455e-05	hyper
chr1	110609951	110613620	shore:2595/island:1413/shore:2596	promoter.ALX3/CDS.ALX3/5UTR.ALX3/exon.ALX3/intron.ALX3	9.95432e-05	hyper
chr10	102483511	102484830	shore:24486/island:13367/shore:24487	intergenic.NA	9.95432e-05	hyper
chr19	23252471	23254650	shore:42714/island:23568/shore:42715/island:23569/shore:42716	intergenic.NA	0.00010098	hyper
chr7	128337321	128338130	inter:7569	intergenic.NA	0.000101822	hyper
chr15	68117301	68122920	island:18220/shore:33349	CDS.SKOR1/exon.SKOR1/intron.SKOR1	0.000103761	hyper
chr14	102029651	102031870	island:17605/shore:32208	1to5kb.NA/1to5kb.MIR1247/exon.DIO3/3UTR.DIO3/intergenic.NA	0.000104508	hyper
chr8	75896231	75897430	shore:20056/island:10949/shore:20057	promoter.CRISPLD1/5UTR.CRISPLD1/exon.CRISPLD1/intron.CRISPLD1	0.000104696	hyper
chr19	10563401	10564080	inter:16704	promoter.PDE4A/CDS.PDE4A/5UTR.PDE4A/exon.PDE4A/intron.PDE4A	0.000107012	hyper
chr11	94473241	94474740	shore:27228/island:14904/shore:27229	intergenic.NA	0.000107012	hyper
chr8	99959181	99962260	shore:20255/island:11054/shore:20256	1to5kb.STK3/CDS.OSR2/5UTR.OSR2/exon.OSR2/intron.OSR2	0.00010905	hyper
chr1	18433941	18435090	shore:956/island:548/shore:957	promoter.IGSF21/CDS.IGSF21/5UTR.IGSF21/exon.IGSF21/intron.IGSF21	0.00010905	hyper
chr3	6901871	6904930	shore:7676/island:4168/shore:7677/island:4169/shore:7678	promoter.GRM7/CDS.GRM7/5UTR.GRM7/exon.GRM7/intron.GRM7	0.000109518	hyper
chr13	95362891	95366300	shore:30618/island:16738/shore:30619	promoter.NA/promoter.SOX21/1to5kb.NA/1to5kb.SOX21/CDS.SOX21/5UTR.SOX21/exon.NA/exon.SOX21/intron.NA/3UTR.SOX21	0.000110654	hyper
chr10	26503511	26507720	shore:23526/island:12864/shore:23527	promoter.GAD2/1to5kb.GAD2/CDS.GAD2/5UTR.GAD2/exon.GAD2/intron.GAD2	0.000110671	hyper
chr6	5994231	5996570	shore:14020/island:7638/shore:14021/island:7639/shore:14022	intergenic.NA	0.000112535	hyper
chr8	80523101	80523740	shore:20071	CDS.STMN2/5UTR.STMN2/exon.STMN2/intron.STMN2	0.000114768	hyper
chr10	99788951	99791570	shore:24413/island:13323/shore:24414	promoter.CRTAC1/CDS.CRTAC1/5UTR.CRTAC1/exon.CRTAC1/intron.CRTAC1	0.000115337	hyper
chr2	105469391	105473760	island:3195/shore:5908	promoter.POU3F3/1to5kb.POU3F3/1to5kb.PANTR1/CDS.POU3F3/exon.POU3F3/intergenic.NA	0.000116775	hyper
chr15	89920511	89923140	shore:33792/island:18452/shore:33793	promoter.MIR9-3HG/exon.MIR9-3HG/intron.MIR9-3HG	0.000118191	hyper
chr4	183368991	183370680	shore:11551/island:6269/shore:11552	intron.TENM3	0.000119466	hyper
chr5	140855231	140858350	shore:13210/island:7192/shore:13211/island:7193/shore:13212	promoter.PCDHGC3/CDS.PCDHGC3/5UTR.PCDHGC3/exon.PCDHGC3/intron.PCDHGA1/intron.PCDHGA2/intron.PCDHGA3/intron.PCDHGB1/intron.PCDHGA4/intron.PCDHGB2/intron.PCDHGA5/intron.PCDHGB3/intron.PCDHGA6/intron.PCDHGA7/intron.PCDHGB4/intron.PCDHGA8/intron.PCDHGB5/intron.PCDHGA9/intron.PCDHGB6/intron.PCDHGA10/intron.PCDHGB7/intron.PCDHGA11/intron.PCDHGA12/intron.PCDHGC3/3UTR.PCDHGC3	0.000121541	hyper
chr8	89338871	89341170	shore:20160/island:11003/shore:20161	promoter.MMP16/1to5kb.MMP16/CDS.MMP16/5UTR.MMP16/exon.MMP16/intron.MMP16	0.000121566	hyper
chr20	21488091	21497440	island:24935/shore:45095	promoter.NKX2-2/1to5kb.NKX2-2/CDS.NKX2-2/5UTR.NKX2-2/exon.NKX2-2/intron.NKX2-2/3UTR.NKX2-2/intergenic.NA	0.000121884	hyper
chr3	44036281	44038880	shore:8117/island:4401	intergenic.NA	0.000122065	hyper
chr11	32454591	32459070	shore:25953/island:14208/shore:25954	promoter.WT1-AS/promoter.NA/promoter.WT1/1to5kb.WT1-AS/1to5kb.NA/1to5kb.WT1/CDS.WT1/5UTR.WT1/exon.WT1-AS/exon.WT1/intron.WT1-AS/intron.WT1	0.000122206	hyper
chr5	169930651	169932120	shore:13486/island:7339/shore:13487	promoter.KCNIP1/CDS.KCNIP1/5UTR.KCNIP1/exon.KCNIP1/intron.KCNIP1	0.000124236	hyper
chr7	4922421	4923700	shore:16676/island:9106/shore:16677	promoter.RADIL/5UTR.RADIL/exon.RADIL/intron.RADIL	0.000124953	hyper
chr2	237415681	237416980	shore:7368/island:3996/shore:7369	promoter.IQCA1/1to5kb.IQCA1/CDS.IQCA1/5UTR.IQCA1/exon.IQCA1/intron.IQCA1	0.000125281	hyper
chr20	21081511	21083170	island:24928/shore:45084	intergenic.NA	0.000125527	hyper
chr17	35299051	35301310	island:20689/shore:37750	1to5kb.AATF/CDS.LHX1/exon.LHX1/intron.LHX1/3UTR.LHX1	0.0001274	hyper
chr6	166421621	166423010	shore:15987/island:8701/shore:15988	intergenic.NA	0.000128033	hyper
chr3	147138151	147140450	shore:9292/island:5024/shore:9293	intergenic.NA	0.000129685	hyper
chr1	13909331	13911260	shore:791/island:460/shore:792/island:461/shore:793	promoter.PDPN/1to5kb.PDPN/CDS.PDPN/5UTR.PDPN/exon.PDPN/intron.PDPN	0.000129685	hyper
chr19	10023481	10025150	shore:41770/island:23033	intron.OLFM2	0.000130141	hyper
chr12	52400191	52402000	shore:28469/island:15558/shore:28470	promoter.GRASP/1to5kb.GRASP/CDS.GRASP/5UTR.GRASP/exon.GRASP/intron.GRASP	0.000130141	hyper
chr17	32964131	32965460	shore:37662/island:20641/shore:37663	CDS.TMEM132E/exon.TMEM132E/intron.TMEM132E/3UTR.TMEM132E	0.000130875	hyper
chr6	11043571	11045580	shore:14106/island:7691/shore:14107	promoter.ELOVL2-AS1/promoter.ELOVL2/1to5kb.ELOVL2-AS1/CDS.ELOVL2/5UTR.ELOVL2/exon.ELOVL2-AS1/exon.ELOVL2/intron.ELOVL2-AS1/intron.ELOVL2	0.000130875	hyper
chr4	111538971	111541240	shore:11095/island:6017/shore:11096/island:6018/shore:11097	CDS.PITX2/exon.PITX2/intron.PITX2/3UTR.PITX2	0.000131354	hyper
chr11	89711731	89714090	shore:27184/island:14881/shore:27185/island:14882/shore:27186	intergenic.NA	0.000131354	hyper
chr14	75077021	75079050	shore:31831/island:17406	promoter.LTBP2/CDS.LTBP2/5UTR.LTBP2/exon.LTBP2/intron.LTBP2	0.000132631	hyper
chr14	57283151	57284760	shore:31548/island:17260/shore:31549	intron.OTX2-AS1	0.000135578	hyper
chr3	147113391	147116690	shore:9284/island:5018/shore:9285/island:5019/shore:9286	promoter.ZIC4/1to5kb.ZIC4/CDS.ZIC4/5UTR.ZIC4/exon.ZIC4/intron.ZIC4	0.000138356	hyper
chr7	8472901	8475770	shore:16848/island:9203/shore:16849	promoter.NXPH1/CDS.NXPH1/5UTR.NXPH1/exon.NXPH1/intron.NXPH1	0.00013861	hyper
chr5	135265021	135267200	shore:12950/island:7039/shore:12951	promoter.FBXL21/5UTR.FBXL21/exon.FBXL21/intron.FBXL21	0.000140787	hyper
chr2	220222771	220224110	shore:7113/island:3856/shore:7114	intergenic.NA	0.000141074	hyper
chr2	133425861	133429170	shore:6388/island:3456/shore:6389	promoter.LYPD1/1to5kb.LYPD1/CDS.LYPD1/5UTR.LYPD1/exon.LYPD1/intron.LYPD1	0.000141833	hyper
chr3	147140561	147141590	shore:9293	intergenic.NA	0.000142674	hyper
chr6	108491721	108493070	shore:15433	CDS.NR2E1/exon.NR2E1/intron.NR2E1	0.000143213	hyper
chr8	49782371	49784030	shore:19825/island:10825/shore:19826	intergenic.NA	0.000144358	hyper
chr10	28032561	28036040	island:12880/shore:23557	promoter.MKX/1to5kb.MKX/5UTR.MKX/exon.MKX/intron.MKX	0.000145423	hyper
chr9	133027481	133028880	shore:22560/island:12312/shore:22561	intergenic.NA	0.000145423	hyper
chr7	153748091	153750770	shore:18771/island:10244/shore:18772	promoter.DPP6/1to5kb.DPP6/CDS.DPP6/5UTR.DPP6/exon.DPP6/intron.DPP6	0.000146568	hyper
chr9	137392741	137394120	shore:22767/island:12424/shore:22768	intergenic.NA	0.000149465	hyper
chr2	220299131	220300340	shore:7119/island:3859/shore:7120	promoter.SPEG/1to5kb.SPEG/CDS.SPEG/exon.SPEG/intron.SPEG	0.00015021	hyper
chr2	88848421	88849910	shore:5692/island:3082/shore:5693	intergenic.NA	0.0001505	hyper
chr4	158141151	158142220	shore:11429/island:6203/shore:11430	promoter.GRIA2/1to5kb.GRIA2/CDS.GRIA2/5UTR.GRIA2/exon.GRIA2/intron.GRIA2	0.000151146	hyper
chr11	111382821	111384190	shore:27321/island:14952/shore:27322	promoter.MIR34B/promoter.MIR34C/promoter.BTG4/1to5kb.MIR34C/1to5kb.C11orf88/1to5kb.BTG4/5UTR.BTG4/exon.NA/exon.MIR34B/exon.MIR34C/exon.BTG4/intron.NA/intron.BTG4	0.000151934	hyper
chr5	3594101	3598080	shore:11973/island:6517	promoter.IRX1/1to5kb.IRX1/CDS.IRX1/5UTR.IRX1/exon.IRX1/intron.IRX1	0.00015243	hyper
chr13	50706191	50708360	shore:30460/island:16650/shore:30461	intron.DLEU1	0.000153264	hyper
chr13	20715851	20717850	shore:30036/island:16422/shore:30037	promoter.NA/CDS.GJA3/CDS.NA/5UTR.GJA3/exon.GJA3/exon.NA/intron.GJA3/3UTR.GJA3	0.000153264	hyper
chr14	85995401	85998950	shore:31947/island:17466/shore:31948/island:17467/shore:31949	promoter.FLRT2/promoter.NA/1to5kb.FLRT2/1to5kb.NA/5UTR.FLRT2/exon.FLRT2/exon.NA/intron.FLRT2	0.000153264	hyper
chr4	85416581	85419690	shore:10939/island:5934	promoter.NKX6-1/CDS.NKX6-1/5UTR.NKX6-1/exon.NKX6-1/intron.NKX6-1	0.000154829	hyper
chr8	105235121	105236420	shore:20323/island:11090/shore:20324	intron.RIMS2	0.000154829	hyper
chr8	72468261	72471500	shore:20020/island:10930/shore:20021	intergenic.NA	0.000155815	hyper
chr7	154861701	154863570	shore:18785/island:10251/shore:18786/island:10252/shore:18787	promoter.HTR5A/promoter.HTR5A-AS1/CDS.HTR5A/CDS.HTR5A-AS1/5UTR.HTR5A/5UTR.HTR5A-AS1/exon.HTR5A/exon.HTR5A-AS1/intron.HTR5A/intron.HTR5A-AS1	0.000155815	hyper
chr1	20878541	20880870	shore:1026/island:587/shore:1027	promoter.FAM43B/CDS.FAM43B/5UTR.FAM43B/exon.FAM43B/3UTR.FAM43B	0.000157259	hyper
chr10	101289411	101292020	shore:24433/island:13335/shore:24434/island:13336/shore:24435	promoter.NKX2-3/promoter.NA/1to5kb.NKX2-3/1to5kb.NA/exon.NA/intron.NA	0.000159123	hyper
chr12	108236641	108240090	shore:29167/island:15933/shore:29168	intergenic.NA	0.000160873	hyper
chr19	8656181	8658150	shore:41715/island:23004/shore:41716	promoter.ADAMTS10/1to5kb.ADAMTS10/CDS.ADAMTS10/5UTR.ADAMTS10/exon.ADAMTS10/intron.ADAMTS10	0.000161136	hyper
chr11	123300821	123302460	shore:27556/island:15074/shore:27557	intergenic.NA	0.000161298	hyper
chr3	117715381	117716720	shore:8820/island:4775/shore:8821	intergenic.NA	0.000161298	hyper
chr4	5712591	5713890	shore:10254/island:5567/shore:10255	promoter.EVC/1to5kb.EVC2/CDS.EVC/5UTR.EVC/exon.EVC/intron.EVC	0.000161298	hyper
chr16	15527771	15529160	shore:34884/island:19109/shore:34885	promoter.C16orf45/CDS.C16orf45/5UTR.C16orf45/exon.C16orf45/intron.C16orf45	0.000161298	hyper
chr12	16757631	16758330	inter:11529	promoter.LMO3/CDS.LMO3/5UTR.LMO3/exon.LMO3/intron.LMO3	0.000161617	hyper
chr4	8868741	8870710	shore:10378/island:5633/shore:10379	CDS.HMX1/exon.HMX1/intron.HMX1/3UTR.HMX1/intergenic.NA	0.000161617	hyper
chr19	51829691	51831560	shore:44225/island:24449/shore:44226	CDS.IGLON5/exon.IGLON5/intron.IGLON5	0.000161617	hyper
chr11	94133741	94135210	shore:27220/island:14900/shore:27221	promoter.GPR83/CDS.GPR83/5UTR.GPR83/exon.GPR83/intron.GPR83	0.000163531	hyper
chr3	125075621	125077210	shore:8922/island:4827/shore:8923	intron.ZNF148	0.000165041	hyper
chr5	59188731	59190220	shore:12306/island:6696/shore:12307	promoter.PDE4D/CDS.PDE4D/5UTR.PDE4D/exon.PDE4D/intron.PDE4D	0.000165041	hyper
chr2	45159091	45162350	shore:5169/island:2799/shore:5170/island:2800	intergenic.NA	0.000166543	hyper
chr3	142680821	142684220	shore:9265/island:5008/shore:9266	promoter.NA/promoter.PAQR9/1to5kb.NA/1to5kb.PAQR9/CDS.PAQR9/exon.NA/exon.PAQR9/intron.NA/3UTR.PAQR9	0.000166543	hyper
chr8	41753121	41755490	shore:19747/island:10783/shore:19748	promoter.ANK1/1to5kb.ANK1/CDS.ANK1/5UTR.ANK1/exon.ANK1/intron.ANK1	0.000167898	hyper
chr6	96462971	96464430	shore:15307/island:8336/shore:15308	promoter.FUT9/5UTR.FUT9/exon.FUT9/intron.FUT9	0.000167959	hyper
chr9	79633091	79636590	shore:21645/island:11823/shore:21646	promoter.FOXB2/1to5kb.FOXB2/CDS.FOXB2/exon.FOXB2/intergenic.NA	0.000168262	hyper
chr5	80689231	80690480	shore:12549/island:6823/shore:12550	promoter.ACOT12/CDS.ACOT12/5UTR.ACOT12/exon.ACOT12/intron.RNU5E-1/intron.ACOT12	0.000169706	hyper
chr10	105036311	105038610	shore:24619/island:13448/shore:24620	promoter.INA/promoter.NA/1to5kb.NA/CDS.INA/5UTR.INA/exon.INA/exon.NA/intron.INA	0.000169706	hyper
chr10	128992751	128995590	shore:24934/island:13616/shore:24935	promoter.INSYN2/1to5kb.INSYN2/5UTR.INSYN2/exon.INSYN2/intron.DOCK1/intron.INSYN2	0.000171183	hyper
chr2	31805031	31807260	shore:5045/island:2733/shore:5046/island:2734/shore:5047	promoter.SRD5A2/1to5kb.SRD5A2/CDS.SRD5A2/5UTR.SRD5A2/exon.SRD5A2/intron.SRD5A2	0.000176975	hyper
chr16	86527581	86529290	shore:36218/island:19828/shore:36219	intron.FENDRR	0.00017718	hyper
chr10	100991861	100993000	shore:24421/island:13327/shore:24422	CDS.HPSE2/exon.HPSE2/intron.HPSE2	0.000180281	hyper
chr10	115803641	115805390	island:13501	promoter.ADRB1/CDS.ADRB1/5UTR.ADRB1/exon.ADRB1/3UTR.ADRB1	0.000180299	hyper
chr14	63511651	63513810	shore:31636/island:17306/shore:31637	promoter.KCNH5/1to5kb.KCNH5/CDS.KCNH5/5UTR.KCNH5/exon.KCNH5/intron.KCNH5	0.000181306	hyper
chr1	149398531	149399570	shore:2985/island:1630/shore:2986	promoter.NA/exon.NA/intergenic.NA	0.000181961	hyper
chr14	101192081	101194200	shore:32184/island:17591/shore:32185	promoter.DLK1/1to5kb.DLK1/CDS.DLK1/5UTR.DLK1/exon.DLK1/intron.DLK1	0.00018218	hyper
chr2	127413261	127415280	shore:6178/island:3344/shore:6179	promoter.GYPC/CDS.GYPC/5UTR.GYPC/exon.GYPC/intron.GYPC	0.000183633	hyper
chr17	47547031	47548180	shore:38377/island:21042/shore:38378	intergenic.NA	0.000184668	hyper
chr3	128711721	128712670	shore:9040/island:4888	promoter.KIAA1257/1to5kb.KIAA1257/CDS.KIAA1257/5UTR.KIAA1257/exon.KIAA1257/intron.KIAA1257	0.000185117	hyper
chr1	156818531	156819450	shore:3317/island:1811/shore:3318	CDS.INSRR/exon.INSRR/intron.NTRK1/intron.INSRR	0.000185117	hyper
chr10	119494161	119495290	shore:24787/island:13538/shore:24788	intergenic.NA	0.000186136	hyper
chr10	22764461	22767370	shore:23497/island:12847/shore:23498	intergenic.NA	0.000187144	hyper
chr17	32483201	32484560	shore:37655/island:20637/shore:37656	promoter.ASIC2/CDS.ASIC2/5UTR.ASIC2/exon.ASIC2	0.000187224	hyper
chr1	147485201	147487930	shore:2894/island:1575/shore:2895/island:1576/shore:2896	promoter.NA/1to5kb.NA	0.00018846	hyper
chr3	62363751	62365300	shore:8551/island:4638/shore:8552	1to5kb.FEZF2/intergenic.NA	0.000188515	hyper
chr13	36044551	36046440	shore:30297/island:16562/shore:30298/island:16563/shore:30299	promoter.NBEA/1to5kb.NBEA/5UTR.NBEA/exon.NBEA/intron.NBEA	0.000190831	hyper
chr3	14851381	14853520	shore:7855/island:4261/shore:7856	intergenic.NA	0.000192712	hyper
chr1	57887691	57890870	shore:2134/island:1169/shore:2135	promoter.DAB1/1to5kb.DAB1/5UTR.DAB1/exon.DAB1/intron.DAB1	0.000193508	hyper
chr12	120031241	120033520	shore:29400/island:16064/shore:29401	promoter.TMEM233/promoter.NA/1to5kb.NA/CDS.TMEM233/5UTR.TMEM233/exon.TMEM233/exon.NA/intron.TMEM233/intron.NA	0.000193508	hyper
chr17	80331851	80334090	shore:39441/island:21631/shore:39442	promoter.UTS2R/CDS.UTS2R/exon.UTS2R/intergenic.NA	0.000193508	hyper
chr7	155254741	155255620	shore:18803/island:10263/shore:18804	CDS.EN2/exon.EN2/intron.EN2/3UTR.EN2	0.000194274	hyper
chr21	22369141	22371090	shore:46286/island:25602/shore:46287	promoter.NCAM2/1to5kb.NCAM2/CDS.NCAM2/5UTR.NCAM2/exon.NCAM2/intron.NCAM2	0.000194274	hyper
chr19	1725071	1726450	shore:40856/island:22469/shore:40857	intergenic.NA	0.000194427	hyper
chr22	21714391	21716070	shore:47128/island:26062/shore:47129	intergenic.NA	0.000195512	hyper
chr1	91299881	91302220	shore:2402/island:1314/shore:2403	promoter.NA/exon.NA/intron.NA	0.000197273	hyper
chr8	57025261	57026840	shore:19880/island:10854/shore:19881	promoter.MOS/CDS.MOS/exon.MOS/intergenic.NA	0.000199393	hyper
chr7	56182391	56184940	shore:17387/island:9501/shore:17388	promoter.PSPH/promoter.NUPR2/promoter.NA/CDS.PSPH/CDS.NUPR2/CDS.NA/5UTR.PSPH/5UTR.NUPR2/exon.PSPH/exon.NUPR2/exon.NA/intron.PSPH/intron.NUPR2/3UTR.NUPR2	0.000200056	hyper
chr13	93878941	93881220	shore:30607/island:16731/shore:30608	promoter.GPC6/CDS.GPC6/5UTR.GPC6/exon.GPC6/intron.GPC6	0.000200056	hyper
chr4	147557941	147562320	shore:11335/island:6152/shore:11336/island:6153/shore:11337	promoter.POU4F2/1to5kb.POU4F2/CDS.POU4F2/5UTR.POU4F2/exon.POU4F2/intron.POU4F2/3UTR.POU4F2	0.000200056	hyper
chr20	37351431	37358420	shore:45421/island:25113/shore:45422	promoter.SLC32A1/1to5kb.SLC32A1/CDS.SLC32A1/5UTR.SLC32A1/exon.SLC32A1/intron.SLC32A1/3UTR.SLC32A1/intergenic.NA	0.000201122	hyper
chr8	65492621	65494690	shore:19957/island:10897/shore:19958	promoter.BHLHE22/promoter.LOC401463/1to5kb.LOC401463/CDS.BHLHE22/5UTR.BHLHE22/exon.BHLHE22/exon.LOC401463/intron.LOC401463/3UTR.BHLHE22	0.000202802	hyper
chr2	193058751	193061090	shore:6820/island:3701/shore:6821	promoter.TMEFF2/1to5kb.TMEFF2/CDS.TMEFF2/5UTR.TMEFF2/exon.TMEFF2/intron.TMEFF2	0.000205468	hyper
chr7	100945391	100947140	inter:7458	1to5kb.NA/intergenic.NA	0.000208269	hyper
chr4	8270451	8272340	shore:10342/island:5613/shore:10343	promoter.HTRA3/1to5kb.HTRA3/CDS.HTRA3/5UTR.HTRA3/exon.HTRA3/intron.HTRA3	0.000208269	hyper
chr13	100649061	100651200	shore:30681/island:16773/shore:30682	intergenic.NA	0.000210208	hyper
chr5	54179131	54180950	shore:12264/island:6671/shore:12265	intergenic.NA	0.000210397	hyper
chr1	22140231	22141790	shore:1072/island:611/shore:1073	CDS.LDLRAD2/exon.LDLRAD2/intron.LDLRAD2	0.000210397	hyper
chr1	50880621	50885620	shore:2001/island:1098/shore:2002/island:1099/shore:2003/island:1100/shore:2004/island:1101/shore:2005/island:1102	CDS.DMRTA2/exon.DMRTA2/intron.DMRTA2/3UTR.DMRTA2/intergenic.NA	0.000212995	hyper
chr15	100345811	100347850	shore:33983/island:18556/shore:33984	promoter.NA/promoter.DNM1P46/1to5kb.NA/5UTR.DNM1P46/exon.DNM1P46/intron.DNM1P46	0.000215194	hyper
chr4	41881831	41884780	shore:10605/island:5758/shore:10606/island:5759/shore:10607	promoter.NA/exon.NA/intron.NA	0.000215612	hyper
chr1	207818031	207819610	shore:3915/island:2122/shore:3916	promoter.CR1L/CDS.CR1L/5UTR.CR1L/exon.CR1L/intron.CR1L	0.000215846	hyper
chr6	137814051	137815980	shore:15679/island:8542/shore:15680	promoter.OLIG3/CDS.OLIG3/5UTR.OLIG3/exon.OLIG3/3UTR.OLIG3	0.00021667	hyper
chr5	158523081	158525220	shore:13422/island:7304/shore:13423	promoter.EBF1/1to5kb.NA/1to5kb.EBF1/CDS.EBF1/5UTR.EBF1/exon.EBF1/intron.EBF1	0.00021723	hyper
chr2	213400971	213404050	shore:6989/island:3788/shore:6990	promoter.ERBB4/CDS.ERBB4/5UTR.ERBB4/exon.ERBB4/intron.ERBB4	0.000218359	hyper
chr8	70946201	70947830	shore:20008/island:10924/shore:20009	intergenic.NA	0.000221715	hyper
chr6	26734261	26736030	inter:5940	promoter.NA/exon.NA/intergenic.NA	0.000223352	hyper
chr2	42719461	42721290	shore:5132/island:2779	promoter.MTA3/promoter.KCNG3/1to5kb.MTA3/CDS.KCNG3/5UTR.KCNG3/exon.KCNG3/intron.KCNG3	0.000223352	hyper
chr8	116660201	116661060	shore:20364/island:11111/shore:20365	intron.TRPS1	0.000223352	hyper
chr20	3072581	3074510	shore:44887/island:24821/shore:44888	intergenic.NA	0.000223352	hyper
chr17	10100721	10102900	shore:37163/island:20373/shore:37164	promoter.GAS7/1to5kb.GAS7/CDS.GAS7/5UTR.GAS7/exon.GAS7/intron.GAS7	0.000224548	hyper
chr7	96626571	96627450	inter:7387/shelf:15512	intron.DLX6-AS1	0.000224763	hyper
chr1	36042031	36044290	shore:1564/island:869/shore:1565	CDS.PSMB2/exon.PSMB2/intron.TFAP2E/intron.PSMB2/3UTR.PSMB2	0.000229139	hyper
chr20	21685251	21688010	shore:45099/island:24938/shore:45100	promoter.PAX1/1to5kb.PAX1/CDS.PAX1/5UTR.PAX1/exon.PAX1/intron.PAX1	0.000230757	hyper
chr14	36986111	36988650	shore:31359/island:17156	promoter.NA/1to5kb.NA/1to5kb.SFTA3/CDS.NKX2-1/5UTR.NKX2-1/exon.NA/exon.NKX2-1/intron.SFTA3/intron.NKX2-1/3UTR.NKX2-1	0.000231351	hyper
chr8	101117601	101119060	shore:20264/island:11059/shore:20265	promoter.RGS22/1to5kb.RGS22/CDS.RGS22/5UTR.RGS22/exon.RGS22/intron.RGS22	0.000233283	hyper
chr19	31839321	31843340	shore:42784/island:23607/shore:42785	promoter.TSHZ3/1to5kb.TSHZ3/CDS.TSHZ3/5UTR.TSHZ3/exon.TSHZ3/intron.TSHZ3	0.000233461	hyper
chr19	18077511	18078470	shore:42460/island:23427/shore:42461	intron.KCNN1	0.000237342	hyper
chr12	54359431	54360980	shore:28587/island:15622/shore:28588/island:15623/shore:28589	promoter.NA/1to5kb.NA/exon.HOTAIR/intron.HOTAIR	0.000237342	hyper
chr11	63765571	63769110	shore:26420/island:14460/shore:26421	CDS.MACROD1/exon.OTUB1/exon.MACROD1/intron.MACROD1/3UTR.OTUB1/3UTR.MACROD1/intergenic.NA	0.000237785	hyper
chr3	185911081	185913100	shore:9628/island:5199/shore:9629	intron.DGKG	0.000238377	hyper
chr7	153444111	153447130	shore:18767/island:10242/shore:18768	intergenic.NA	0.000240535	hyper
chr2	238863921	238865630	shore:7390/island:4007/shore:7391	intergenic.NA	0.000240653	hyper
chr3	147074691	147075450	shelf:8178/shore:9281	intergenic.NA	0.000242301	hyper
chr19	30015571	30021590	shore:42746/island:23585/shore:42747	promoter.VSTM2B/promoter.LOC284395/1to5kb.VSTM2B/1to5kb.LOC284395/CDS.VSTM2B/exon.VSTM2B/exon.LOC284395/intron.VSTM2B/intron.LOC284395	0.000242325	hyper
chr13	26041431	26043800	shore:30174/island:16493/shore:30175	promoter.ATP8A2/1to5kb.ATP8A2/CDS.ATP8A2/5UTR.ATP8A2/exon.ATP8A2/intron.ATP8A2	0.000242579	hyper
chr17	42635021	42637100	island:20895/shore:38121	CDS.FZD2/5UTR.FZD2/exon.FZD2/3UTR.FZD2	0.000243503	hyper
chr4	7194181	7195670	shore:10316/island:5600/shore:10317	promoter.SORCS2/CDS.SORCS2/exon.SORCS2/intron.SORCS2	0.000244705	hyper
chr10	125750701	125752270	shore:24877/island:13586/shore:24878	intergenic.NA	0.000247981	hyper
chr12	54354101	54355840	shore:28585/island:15621/shore:28586	intergenic.NA	0.000251347	hyper
chr6	150358501	150359720	shore:15813/island:8613/shore:15814	intergenic.NA	0.000251681	hyper
chr19	46915051	46918720	shore:43739/island:24161/shore:43740/island:24162/shore:43741	promoter.CCDC8/1to5kb.CCDC8/CDS.CCDC8/5UTR.CCDC8/exon.CCDC8	0.000252894	hyper
chr18	73627671	73629100	shore:40235/island:22057/shore:40236	intergenic.NA	0.000253232	hyper
chr9	96710501	96712180	shore:21826/island:11917/shore:21827	intergenic.NA	0.000258203	hyper
chr13	95356731	95358150	shore:30616/island:16736/shore:30617	intergenic.NA	0.000265499	hyper
chr2	145273161	145275560	shore:6433/island:3479/shore:6434	promoter.NA/promoter.ZEB2/1to5kb.NA/1to5kb.ZEB2-AS1/CDS.ZEB2/5UTR.ZEB2/exon.ZEB2/intron.ZEB2	0.000266612	hyper
chr9	29211641	29215530	shore:21156/island:11564/shore:21157/island:11565/shore:21158	promoter.LINGO2/1to5kb.LINGO2/5UTR.LINGO2/exon.LINGO2/intron.LINGO2	0.000272842	hyper
chr10	131756501	131759050	shore:24973/island:13637/shore:24974	CDS.EBF3/exon.EBF3/intron.EBF3	0.000273385	hyper
chr4	8892831	8896450	shore:10382/island:5636/shore:10383	intergenic.NA	0.000281231	hyper
chr18	70208691	70212100	shore:40207/island:22042/shore:40208	promoter.CBLN2/1to5kb.CBLN2/CDS.CBLN2/5UTR.CBLN2/exon.CBLN2/intron.CBLN2	0.000281711	hyper
chr2	20869041	20872580	shore:4855/island:2632/shore:4856	CDS.GDF7/exon.GDF7/intron.GDF7/3UTR.GDF7/intergenic.NA	0.000283148	hyper
chr8	59057891	59060060	shore:19910/island:10871/shore:19911	promoter.NA/CDS.FAM110B/CDS.NA/5UTR.FAM110B/exon.FAM110B/exon.NA/intron.FAM110B/3UTR.FAM110B	0.000283187	hyper
chr5	79330671	79331730	shore:12533/island:6815/shore:12534	promoter.THBS4/CDS.THBS4/5UTR.THBS4/exon.THBS4/intron.THBS4	0.000284324	hyper
chr13	102568151	102570200	shore:30695/island:16780/shore:30696	promoter.FGF14/1to5kb.FGF14/CDS.FGF14/exon.FGF14/intron.FGF14	0.00028511	hyper
chr9	129485291	129486530	island:12198/shore:22345	intergenic.NA	0.000289045	hyper
chr3	71801901	71804560	shore:8611/island:4669/shore:8612	promoter.GPR27/promoter.EIF4E3/1to5kb.GPR27/1to5kb.EIF4E3/CDS.GPR27/5UTR.EIF4E3/exon.GPR27/exon.EIF4E3/intron.EIF4E3	0.000289292	hyper
chr2	124781921	124783800	shore:6176/island:3343/shore:6177	promoter.CNTNAP5/CDS.CNTNAP5/5UTR.CNTNAP5/exon.CNTNAP5/intron.CNTNAP5	0.000292175	hyper
chr1	242686541	242688960	shore:4428/island:2400/shore:4429/island:2401/shore:4430	promoter.PLD5/CDS.PLD5/5UTR.PLD5/exon.PLD5/intron.PLD5	0.000292424	hyper
chr10	8075681	8078680	shore:23355/island:12770/shore:23356/island:12771/shore:23357	intergenic.NA	0.000294026	hyper
chr2	206549281	206552160	shore:6926/island:3756/shore:6927	intron.NRP2	0.00029656	hyper
chr13	37003671	37007350	shore:30312/island:16571/shore:30313	promoter.CCNA1/1to5kb.CCNA1/CDS.CCNA1/5UTR.CCNA1/exon.CCNA1/intron.CCNA1	0.00029656	hyper
chr13	96204211	96206180	shore:30628/island:16743/shore:30629	promoter.CLDN10/CDS.CLDN10/5UTR.CLDN10/exon.CLDN10/intron.CLDN10	0.000297403	hyper
chr19	52956421	52957510	shore:44280/island:24480/shore:44281	promoter.ZNF578/5UTR.ZNF578/exon.ZNF578/intron.ZNF578	0.00030218	hyper
chr20	58151891	58153290	shore:45817/island:25324/shore:45818	promoter.PHACTR3/CDS.PHACTR3/exon.PHACTR3/intron.PHACTR3	0.000302223	hyper
chr21	38377161	38378950	shore:46436/island:25681	promoter.RIPPLY3/1to5kb.RIPPLY3/5UTR.RIPPLY3/exon.RIPPLY3/intron.RIPPLY3	0.000306981	hyper
chr1	63795131	63796430	shore:2185/island:1196/shore:2186	1to5kb.NA	0.000319452	hyper
chr4	158142411	158144380	shore:11430/island:6204/shore:11431	CDS.GRIA2/5UTR.GRIA2/exon.GRIA2/intron.GRIA2	0.000320636	hyper
chr1	967791	971220	shore:50/island:29/shore:51	CDS.AGRN/exon.AGRN/intron.AGRN	0.000320636	hyper
chr10	22633761	22635180	shore:23493/island:12845/shore:23494	promoter.SPAG6/CDS.SPAG6/5UTR.SPAG6/exon.SPAG6/intron.SPAG6	0.000320851	hyper
chr4	48485161	48486810	shore:10649/island:5781/shore:10650	promoter.SLC10A4/CDS.SLC10A4/5UTR.SLC10A4/exon.SLC10A4/intron.SLC10A4	0.000321709	hyper
chr14	57274301	57277120	shore:31544/island:17257/shore:31545	1to5kb.OTX2-AS1/1to5kb.OTX2/5UTR.OTX2/exon.OTX2/intron.OTX2	0.000329032	hyper
chr7	155255941	155256610	shore:18804	exon.EN2/3UTR.EN2	0.000331811	hyper
chr20	589931	591530	shore:44787/island:24768/shore:44788	promoter.TCF15/CDS.TCF15/5UTR.TCF15/exon.TCF15/intron.TCF15	0.000333974	hyper
chr5	180099781	180101540	shore:13853/island:7542/shore:13854	intergenic.NA	0.000346466	hyper
chr7	86273741	86274940	inter:7343	CDS.GRM3/5UTR.GRM3/exon.GRM3/intron.GRM3	0.000349899	hyper
chr7	100942281	100944110	inter:7458	intergenic.NA	0.000351746	hyper
chr1	91188851	91193070	shore:2399/island:1312/shore:2400/island:1313/shore:2401	intergenic.NA	0.000353124	hyper
chr3	9594871	9595910	shore:7696/island:4179/shore:7697	promoter.LHFPL4/5UTR.LHFPL4/exon.LHFPL4/intron.LHFPL4	0.000357339	hyper
chr1	4713631	4716890	shore:495/island:299/shore:496	promoter.AJAP1/1to5kb.AJAP1/CDS.AJAP1/5UTR.AJAP1/exon.AJAP1/intron.AJAP1	0.0003668	hyper
chr7	128550161	128551240	shore:18379/island:10031/shore:18380	promoter.KCP/CDS.KCP/5UTR.KCP/exon.KCP/intron.KCP	0.000369942	hyper
chr6	26766061	26767840	inter:5940	promoter.NA/exon.NA/intergenic.NA	0.00037306	hyper
chr3	35680091	35681920	shore:7993/island:4336/shore:7994	promoter.ARPP21/1to5kb.ARPP21/5UTR.ARPP21/exon.ARPP21/intron.ARPP21	0.000375759	hyper
chr4	66534821	66536870	shore:10761/island:5840/shore:10762/island:5841/shore:10763	promoter.EPHA5-AS1/promoter.EPHA5/1to5kb.EPHA5/CDS.EPHA5/5UTR.EPHA5/exon.EPHA5-AS1/exon.EPHA5/intron.EPHA5-AS1/intron.EPHA5	0.000376477	hyper
chr8	72916961	72917930	shore:20025/island:10933/shore:20026	intron.MSC-AS1	0.00037677	hyper
chr10	88122641	88127840	shore:24217/island:13219/shore:24218	promoter.GRID1/1to5kb.GRID1/CDS.GRID1/5UTR.GRID1/exon.GRID1/intron.GRID1	0.00038516	hyper
chr7	27157491	27158300	shelf:14710	1to5kb.NA/intron.HOXA3	0.000387373	hyper
chr7	133412121	133412780	inter:7605	intron.EXOC4	0.000387373	hyper
chr21	46128631	46129970	shore:46678/island:25812/shore:46679	intron.TSPEAR	0.000394447	hyper
chr10	25464131	25465890	island:12861/shore:23522	promoter.GPR158/promoter.GPR158-AS1/CDS.GPR158/CDS.GPR158-AS1/5UTR.GPR158/5UTR.GPR158-AS1/exon.GPR158/exon.GPR158-AS1/intron.GPR158/intron.GPR158-AS1/3UTR.GPR158-AS1	0.000394447	hyper
chr9	13277341	13280160	shore:21042/island:11502/shore:21043	promoter.MPDZ/5UTR.MPDZ/exon.MPDZ/intron.MPDZ	0.000395986	hyper
chr4	5709461	5711090	shore:10253/island:5566/shore:10254	promoter.EVC2/1to5kb.EVC/CDS.EVC2/5UTR.EVC2/exon.EVC2/intron.EVC2	0.000399042	hyper
chr12	113904401	113906620	island:16007/shore:29307	CDS.LHX5/exon.LHX5/intron.LHX5	0.00040622	hyper
chr10	135042711	135045340	shore:25188/island:13767/shore:25189/island:13768/shore:25190	promoter.UTF1/1to5kb.UTF1/CDS.UTF1/5UTR.UTF1/exon.UTF1/intron.UTF1/3UTR.UTF1/intergenic.NA	0.000407397	hyper
chr2	97192201	97193910	shore:5800/island:3139/shore:5801	intergenic.NA	0.000408106	hyper
chr14	48142991	48145890	shore:31423/island:17195/shore:31424	promoter.MDGA2/1to5kb.MDGA2/CDS.MDGA2/5UTR.MDGA2/exon.MDGA2/intron.MDGA2	0.000414302	hyper
chr17	33822351	33823910	inter:15284	intron.SLFN12L	0.000416319	hyper
chr3	128273131	128275050	shore:9022/island:4879/shore:9023	intergenic.NA	0.000417458	hyper
chr1	228651241	228653430	shore:4264/island:2314/shore:4265	promoter.NA/1to5kb.NA/exon.NA/intergenic.NA	0.000418291	hyper
chr4	9782701	9785260	shore:10401/island:5646/shore:10402	promoter.DRD5/CDS.DRD5/5UTR.DRD5/exon.DRD5/3UTR.DRD5	0.000418291	hyper
chr12	113908631	113910950	shore:29307/island:16008/shore:29308	promoter.LHX5/1to5kb.LHX5/CDS.LHX5/5UTR.LHX5/exon.LHX5/intron.LHX5	0.000418291	hyper
chr2	241770811	241772500	shore:7533/island:4086/shore:7534	intergenic.NA	0.000420431	hyper
chr20	39318691	39321950	island:25123/shore:45439/island:25124/shore:45440	promoter.MAFB/1to5kb.MAFB	0.000427629	hyper
chr12	63543411	63545620	shore:28810/island:15749/shore:28811	CDS.AVPR1A/5UTR.AVPR1A/exon.AVPR1A/intron.AVPR1A	0.000429584	hyper
chr12	114837401	114839160	shore:29319/island:16016/shore:29320	CDS.TBX5/exon.TBX5/intron.TBX5	0.000429814	hyper
chr8	98289081	98290740	shore:20230/island:11040/shore:20231	promoter.TSPYL5/CDS.TSPYL5/5UTR.TSPYL5/exon.TSPYL5	0.000431545	hyper
chr9	95569151	95571100	shore:21787/island:11897	promoter.ANKRD19P/1to5kb.ANKRD19P	0.000441709	hyper
chr3	147124871	147131630	shelf:8182/shore:9287/island:5020/shore:9288/island:5021/shore:9289/island:5022/shore:9290	promoter.ZIC1/promoter.ZIC4/1to5kb.ZIC1/1to5kb.ZIC4/CDS.ZIC1/5UTR.ZIC1/exon.ZIC1/intron.ZIC1/3UTR.ZIC1	0.000443453	hyper
chr3	173302431	173303790	inter:4003	promoter.NLGN1/5UTR.NLGN1/exon.NLGN1/intron.NLGN1	0.00044531	hyper
chr1	149399641	149400830	shore:2986/island:1631/shore:2987	promoter.NA/1to5kb.NA/exon.NA	0.000448277	hyper
chr21	27011291	27012970	shore:46294/island:25606/shore:46295	promoter.JAM2/CDS.JAM2/5UTR.JAM2/exon.JAM2/intron.JAM2	0.000448277	hyper
chr11	32451821	32453380	shore:25952/island:14207/shore:25953	promoter.WT1/1to5kb.WT1-AS/1to5kb.WT1/CDS.WT1/5UTR.WT1/exon.WT1/intron.WT1	0.000448277	hyper
chr7	90225651	90226770	island:9754/shore:17859	promoter.CDK14/CDS.CDK14/5UTR.CDK14/exon.CDK14/intron.CDK14	0.000452359	hyper
chr2	241392181	241394190	island:4062/shore:7495	1to5kb.MIR149/intron.GPC1/intron.LOC100130449	0.000452563	hyper
chr2	208988531	208989660	shore:6960/island:3773/shore:6961	promoter.CRYGD/CDS.CRYGD/5UTR.CRYGD/exon.CRYGD/intron.LOC100507443/intron.CRYGD	0.000456514	hyper
chr20	21376091	21378910	shore:45092/island:24934/shore:45093	promoter.NKX2-4/CDS.NKX2-4/5UTR.NKX2-4/exon.NKX2-4/intron.NKX2-4/3UTR.NKX2-4	0.00045949	hyper
chr10	103534981	103536800	shore:24560/island:13414/shore:24561	promoter.FGF8/1to5kb.FGF8/CDS.FGF8/5UTR.FGF8/exon.FGF8/intron.FGF8	0.000463117	hyper
chr2	182547031	182550300	shore:6757/island:3669/shore:6758	1to5kb.CERKL/1to5kb.NEUROD1/1to5kb.NA	0.000469193	hyper
chr6	161351761	161352700	shore:15949/island:8682/shore:15950	intergenic.NA	0.000469193	hyper
chr9	6644071	6646240	shore:21020/island:11491/shore:21021	promoter.GLDC/CDS.GLDC/5UTR.GLDC/exon.GLDC/intron.GLDC	0.000469193	hyper
chr3	137485931	137491290	shore:9164/island:4954/shore:9165/island:4955/shore:9166/island:4956/shore:9167	1to5kb.NA/intergenic.NA	0.000470162	hyper
chr22	46367001	46368980	island:26460/shore:47894	promoter.WNT7B/CDS.WNT7B/5UTR.WNT7B/exon.WNT7B/intron.WNT7B	0.000470464	hyper
chr6	72595781	72597260	shore:15149/island:8254/shore:15150	promoter.RIMS1/CDS.RIMS1/5UTR.RIMS1/exon.RIMS1/intron.RIMS1	0.000481976	hyper
chr12	117470471	117471610	inter:12065	intergenic.NA	0.000492227	hyper
chr1	148598091	148600230	shore:2947/island:1607/shore:2948	promoter.NA/1to5kb.NA/exon.NA/intergenic.NA	0.000496091	hyper
chr19	21657281	21658740	shore:42666/island:23544/shore:42667	intergenic.NA	0.000497096	hyper
chr11	31817531	31821760	shelf:22353/shore:25934/island:14195/shore:25935	intron.PAX6	0.000498202	hyper
chr2	89063821	89066060	shore:5698/island:3085/shore:5699	promoter.ANKRD36BP2/1to5kb.ANKRD36BP2/5UTR.ANKRD36BP2/exon.ANKRD36BP2/intron.ANKRD36BP2	0.000509035	hyper
chr17	43047281	43048800	shore:38145/island:20909/shore:38146	1to5kb.C1QL1	0.00051196	hyper
chr12	130386931	130389410	shore:29712/island:16230/shore:29713	promoter.TMEM132D/1to5kb.TMEM132D/CDS.TMEM132D/5UTR.TMEM132D/exon.TMEM132D/intron.TMEM132D	0.00051196	hyper
chr15	83314851	83317770	shore:33684/island:18395/shore:33685	promoter.CPEB1-AS1/promoter.CPEB1/1to5kb.CPEB1-AS1/1to5kb.CPEB1/CDS.CPEB1/5UTR.CPEB1/exon.CPEB1-AS1/exon.CPEB1/intron.CPEB1-AS1/intron.CPEB1	0.00051203	hyper
chr9	79628481	79630700	shore:21642/island:11820/shore:21643/island:11821/shore:21644	1to5kb.FOXB2/intergenic.NA	0.000517275	hyper
chr9	138605941	138607700	shore:22820/island:12454/shore:22821	CDS.KCNT1/5UTR.KCNT1/exon.KCNT1/intron.KCNT1	0.000521749	hyper
chr15	53078921	53084080	shore:33119/island:18099/shore:33120/island:18100/shore:33121	promoter.ONECUT1/1to5kb.ONECUT1/CDS.ONECUT1/5UTR.ONECUT1/exon.ONECUT1/intron.ONECUT1	0.000521749	hyper
chr10	23487511	23489910	shore:23508/island:12854/shore:23509	intergenic.NA	0.000526734	hyper
chr7	64342051	64344580	inter:7200	promoter.ZNF273/5UTR.ZNF273/exon.ZNF273/intron.NA/intron.ZNF273	0.000532169	hyper
chr18	11749951	11753050	shore:39703/island:21781/shore:39704	promoter.GNAL/1to5kb.GNAL/CDS.GNAL/5UTR.GNAL/exon.GNAL/intron.GNAL	0.000533399	hyper
chr4	184717151	184719530	shore:11576/island:6282	intergenic.NA	0.000537207	hyper
chr8	57357821	57361100	shore:19891/island:10860/shore:19892/island:10861/shore:19893/island:10862/shore:19894	promoter.NA/promoter.PENK/1to5kb.PENK/CDS.PENK/5UTR.PENK/exon.NA/exon.PENK/intron.NA/intron.PENK/3UTR.PENK	0.000538578	hyper
chr3	44063051	44064090	shore:8119/island:4402/shore:8120	intergenic.NA	0.000542197	hyper
chr10	102505391	102506390	island:13373/shore:24495	promoter.PAX2/1to5kb.PAX2/CDS.PAX2/5UTR.PAX2/exon.PAX2/intron.PAX2	0.000542197	hyper
chr4	5052241	5054320	shore:10249/island:5564/shore:10250	promoter.STK32B/1to5kb.STK32B/CDS.STK32B/5UTR.STK32B/exon.STK32B/intron.STK32B	0.00054654	hyper
chr6	50689601	50690310	shelf:13075/shore:15042	intron.TFAP2D	0.000547656	hyper
chr17	76227321	76228680	shore:39039/island:21396/shore:39040	promoter.TMEM235/CDS.TMEM235/5UTR.TMEM235/exon.TMEM235/intron.TMEM235	0.000570975	hyper
chr20	3217951	3219330	shore:44905/island:24833	promoter.SLC4A11/CDS.SLC4A11/5UTR.SLC4A11/exon.SLC4A11/intron.SLC4A11	0.000571758	hyper
chr19	58950901	58952650	shore:44735/island:24737/shore:44736	promoter.ZNF132/1to5kb.ZNF132/CDS.ZNF132/5UTR.ZNF132/exon.ZNF132/intron.ZNF132	0.000573726	hyper
chr14	38724001	38725930	shore:31392/island:17179/shore:31393	promoter.CLEC14A/CDS.CLEC14A/5UTR.CLEC14A/exon.CLEC14A	0.000575607	hyper
chr7	158784971	158786050	shore:19027/island:10391/shore:19028	intergenic.NA	0.000577612	hyper
chr7	155301501	155303420	shore:18808/island:10266/shore:18809	CDS.CNPY1/5UTR.CNPY1/exon.CNPY1/intron.CNPY1	0.000580348	hyper
chr14	60973201	60974410	shore:31601/island:17287/shore:31602	1to5kb.SIX6	0.000582672	hyper
chr10	124892771	124898180	island:13575/shore:24862/island:13576/shore:24863	promoter.HMX3/1to5kb.HMX3/CDS.HMX3/exon.HMX3/intron.HMX3/intergenic.NA	0.000583084	hyper
chr1	155263571	155265870	shore:3230/island:1764/shore:3231	CDS.PKLR/exon.PKLR/intron.PKLR	0.000583407	hyper
chr7	89747601	89749390	shore:17846/island:9748/shore:17847	promoter.DPY19L2P4/1to5kb.DPY19L2P4/exon.DPY19L2P4/intron.DPY19L2P4	0.000583407	hyper
chr9	34622641	34625070	shore:21234/island:11606/shore:21235/island:11607/shore:21236	1to5kb.DCTN3/CDS.ARID3C/exon.ARID3C/intron.ARID3C	0.000589587	hyper
chr17	48040891	48043310	shore:38409/island:21059/shore:38410	1to5kb.DLX4/intergenic.NA	0.000592426	hyper
chr20	58662161	58663280	shore:45825/island:25328/shore:45826	intergenic.NA	0.00060099	hyper
chr12	15475051	15476180	shore:28071/island:15347/shore:28072	promoter.PTPRO/CDS.PTPRO/5UTR.PTPRO/exon.PTPRO/intron.PTPRO	0.000603171	hyper
chr11	57414181	57414930	shore:26218/island:14353/shore:26219	CDS.YPEL4/5UTR.YPEL4/exon.YPEL4/intron.NA/intron.YPEL4	0.000605967	hyper
chr12	113012741	113013790	shore:29279/island:15993/shore:29280	promoter.RPH3A/5UTR.RPH3A/exon.RPH3A/intron.RPH3A	0.000605967	hyper
chr7	101005531	101007200	shore:18112/island:9890	promoter.COL26A1/CDS.COL26A1/5UTR.COL26A1/exon.COL26A1/intron.COL26A1	0.000610068	hyper
chr10	102995881	102997660	shore:24542/island:13404/shore:24543	intron.LBX1-AS1	0.000611005	hyper
chr11	134145291	134148130	shore:27724/island:15165/shore:27725	promoter.GLB1L3/1to5kb.GLB1L3/CDS.GLB1L3/5UTR.GLB1L3/exon.GLB1L3/intron.GLB1L3	0.000617458	hyper
chr15	101512931	101514600	shore:34009/island:18569/shore:34010	CDS.LRRK1/exon.LRRK1/intron.LRRK1	0.000627228	hyper
chr12	104850181	104852740	shore:29116/island:15906/shore:29117	promoter.CHST11/CDS.CHST11/5UTR.CHST11/exon.CHST11/intron.CHST11	0.000627442	hyper
chr19	1523411	1524850	shore:40818/island:22444/shore:40819	promoter.PLK5/1to5kb.PLK5/5UTR.PLK5/exon.PLK5/intron.PLK5	0.000631367	hyper
chr2	242584841	242585640	inter:3166	intron.ATG4B	0.000634224	hyper
chr10	110225651	110226770	shore:24676/island:13479/shore:24677	intergenic.NA	0.000634224	hyper
chr7	1703591	1706690	shore:16498/island:9003	intergenic.NA	0.000639849	hyper
chr1	2374751	2376150	shore:315/island:196/shore:316	intergenic.NA	0.000640239	hyper
chr16	23846721	23848590	shore:35047/island:19198/shore:35048	promoter.PRKCB/CDS.PRKCB/5UTR.PRKCB/exon.PRKCB/intron.PRKCB	0.000642044	hyper
chr7	84814421	84816690	shore:17819/island:9734/shore:17820	promoter.SEMA3D/5UTR.SEMA3D/exon.SEMA3D/intron.SEMA3D	0.000644675	hyper
chr1	145943491	145946240	shore:2848/island:1547/shore:2849/island:1548/shore:2850	promoter.NA/1to5kb.NA/intron.NBPF20/intron.NBPF10	0.000645207	hyper
chr5	161275001	161275670	inter:5603	promoter.GABRA1/1to5kb.GABRA1/5UTR.GABRA1/exon.GABRA1/intron.GABRA1	0.000649781	hyper
chr10	102507201	102509890	shore:24495/island:13374/shore:24496	promoter.PAX2/1to5kb.PAX2/CDS.PAX2/5UTR.PAX2/exon.PAX2/intron.PAX2	0.000649781	hyper
chr5	87985001	87986130	shore:12587/island:6845/shore:12588	1to5kb.LINC00461/intergenic.NA	0.000651414	hyper
chr22	45368141	45368610	inter:18962	intron.PHF21B	0.000659812	hypo
chr10	50603641	50606960	island:13026/shore:23845	promoter.DRGX/1to5kb.DRGX/5UTR.DRGX/exon.DRGX/intron.DRGX	0.000663104	hyper
chr11	133938591	133939990	shore:27715/island:15160/shore:27716	promoter.JAM3/CDS.JAM3/5UTR.JAM3/exon.JAM3/intron.JAM3	0.000663668	hyper
chr4	113431571	113432950	shore:11115/island:6029/shore:11116	intergenic.NA	0.000677382	hyper
chr7	127841081	127842160	shore:18340/island:10010/shore:18341	intergenic.NA	0.000677382	hyper
chr12	54344831	54346490	shore:28581/island:15618/shore:28582	1to5kb.HOXC12	0.000681085	hyper
chr4	111560231	111561230	shore:11103/island:6023/shore:11104	intron.PITX2	0.000682372	hyper
chr11	65816161	65817030	shore:26636/island:14585/shore:26637	promoter.GAL3ST3/1to5kb.SF3B2/1to5kb.GAL3ST3/5UTR.GAL3ST3/exon.GAL3ST3/intron.GAL3ST3	0.000695913	hyper
chr6	26770961	26771960	inter:5940	promoter.NA/exon.NA/intergenic.NA	0.000697572	hyper
chr20	4228171	4230690	shore:44947/island:24855/shore:44948	promoter.ADRA1D/1to5kb.ADRA1D/CDS.ADRA1D/5UTR.ADRA1D/exon.ADRA1D/intron.ADRA1D	0.000698132	hyper
chr11	71954031	71956550	shore:26939/island:14753/shore:26940	promoter.PHOX2A/1to5kb.PHOX2A/CDS.PHOX2A/5UTR.PHOX2A/exon.PHOX2A/intron.PHOX2A	0.000702625	hyper
chr2	135475131	135477460	shore:6400/island:3462/shore:6401	promoter.TMEM163/CDS.TMEM163/5UTR.TMEM163/exon.TMEM163/intron.TMEM163	0.00070435	hyper
chr18	74961211	74965000	shore:40277/island:22079/shore:40278	promoter.GALR1/CDS.GALR1/5UTR.GALR1/exon.GALR1/intron.GALR1	0.000710417	hyper
chr12	54321031	54322490	shore:28574/island:15614/shore:28575	intergenic.NA	0.000710417	hyper
chr2	45227171	45229000	shore:5178/island:2806/shore:5179	intergenic.NA	0.000711172	hyper
chr1	101004261	101006130	shore:2502/island:1365/shore:2503	promoter.NA/CDS.GPR88/CDS.NA/5UTR.GPR88/exon.GPR88/exon.NA/intron.GPR88/3UTR.GPR88	0.000711172	hyper
chr19	54412321	54413740	shore:44374/island:24531/shore:44375	1to5kb.CACNG7	0.000711172	hyper
chr6	137816151	137819680	shore:15680/island:8543/shore:15681/island:8544/shore:15682	promoter.OLIG3/1to5kb.OLIG3	0.000711172	hyper
chr9	139023961	139025080	shore:22863/island:12479	intergenic.NA	0.000712387	hyper
chr17	37321141	37322590	shore:37828/island:20733/shore:37829	promoter.ARL5C/CDS.ARL5C/5UTR.ARL5C/exon.ARL5C/intron.ARL5C	0.000712579	hyper
chr9	91604941	91607120	shore:21729/island:11866/shore:21730/island:11867/shore:21731	promoter.C9orf47/promoter.S1PR3/1to5kb.S1PR3/CDS.C9orf47/5UTR.C9orf47/5UTR.S1PR3/exon.C9orf47/exon.S1PR3/intron.C9orf47/intron.S1PR3/3UTR.C9orf47	0.00071259	hyper
chr17	20491351	20493870	shore:37410/island:20505/shore:37411	intergenic.NA	0.000713136	hyper
chr5	177432951	177435760	shore:13716/island:7468/shore:13717	promoter.FAM153C/1to5kb.FAM153C/5UTR.FAM153C/exon.FAM153C/intron.FAM153C	0.000714511	hyper
chr7	155257811	155261660	shore:18804/island:10264/shore:18805	intergenic.NA	0.000731109	hyper
chr5	145717721	145720480	shore:13272/island:7225/shore:13273	promoter.POU4F3/CDS.POU4F3/5UTR.POU4F3/exon.POU4F3/intron.POU4F3/3UTR.POU4F3/intergenic.NA	0.000746842	hyper
chr9	102586931	102588400	island:11998/shore:21975	1to5kb.NA/5UTR.NR4A3/exon.NR4A3/intron.NR4A3	0.000752588	hyper
chr7	129417021	129418990	shore:18406/island:10045	1to5kb.MIR96/1to5kb.MIR183	0.000752588	hyper
chr1	19043121	19044130	shore:974/island:561/shore:975	intron.PAX7	0.00075664	hyper
chr6	5998911	6000870	shore:14023/island:7641/shore:14024	CDS.NRN1/exon.NRN1/intron.NRN1/3UTR.NRN1	0.00077066	hyper
chr6	26730131	26731130	inter:5940	promoter.NA/exon.NA/intergenic.NA	0.000771584	hyper
chr6	55038951	55040120	shore:15087/island:8222/shore:15088	promoter.HCRTR2/CDS.HCRTR2/5UTR.HCRTR2/exon.NA/exon.HCRTR2/intron.NA/intron.HCRTR2	0.000775355	hyper
chr7	27149611	27150720	shore:17007/island:9291/shore:17008	CDS.HOXA3/5UTR.HOXA3/exon.HOXA3/intron.HOXA3	0.000777902	hyper
chr4	2431161	2432490	shore:10120/island:5490/shore:10121	intron.CFAP99	0.000781062	hypo
chr4	4862811	4865200	shore:10239/island:5557/shore:10240	CDS.MSX1/exon.MSX1/intron.MSX1/3UTR.MSX1	0.000781062	hyper
chr2	11621651	11623230	shore:4785/island:2593	intergenic.NA	0.000785511	hyper
chr19	37463191	37465000	shore:43064/island:23768/shore:43065	promoter.ZNF568/CDS.ZNF568/5UTR.ZNF568/exon.ZNF568/intron.ZNF568	0.000786872	hyper
chr21	19616841	19618320	shore:46284/island:25601/shore:46285	promoter.CHODL/1to5kb.CHODL/CDS.CHODL/5UTR.CHODL/exon.CHODL/intron.CHODL	0.000791865	hyper
chr7	600081	602100	shore:16304/island:8880/shore:16305	intron.PRKAR1B	0.000798137	hyper
chr15	35046191	35047770	shore:32802/island:17932/shore:32803	promoter.NA/promoter.GJD2/1to5kb.NA/CDS.GJD2/5UTR.GJD2/exon.NA/exon.GJD2/intron.NA/intron.GJD2	0.000799215	hyper
chr11	30037391	30039390	shore:25920/island:14186/shore:25921/island:14187/shore:25922/island:14188/shore:25923	promoter.KCNA4/1to5kb.NA/5UTR.KCNA4/exon.KCNA4/intron.KCNA4	0.000800789	hyper
chr9	139878781	139882280	shore:22996/island:12566/shore:22997	1to5kb.PAXX/CDS.LCNL1/exon.LCNL1/intron.LCNL1/3UTR.LCNL1/intergenic.NA	0.000806323	hyper
chr6	50816851	50819660	shore:15050/island:8202/shore:15051	intergenic.NA	0.00080646	hyper
chr11	122854281	122855780	shore:27545/island:15068/shore:27546	1to5kb.BSX	0.000806933	hyper
chr16	84002131	84003160	shore:36101/island:19764/shore:36102	promoter.NECAB2/1to5kb.NECAB2/CDS.NECAB2/5UTR.NECAB2/exon.NECAB2/intron.NECAB2	0.000806933	hyper
chr16	77822101	77823450	shore:36054/island:19739/shore:36055	promoter.VAT1L/CDS.VAT1L/5UTR.VAT1L/exon.VAT1L/intron.VAT1L	0.000814434	hyper
chr20	20345161	20346430	island:24924	1to5kb.INSM1	0.000820049	hyper
chr19	57862221	57863510	shore:44627/island:24680/shore:44628	promoter.ZNF304/CDS.ZNF304/5UTR.ZNF304/exon.ZNF304/intron.ZNF304	0.000828895	hyper
chr4	8875351	8876700	island:5635/shore:10381	1to5kb.HMX1	0.000833529	hyper
chr1	119541661	119542620	shore:2746	intergenic.NA	0.000835074	hyper
chr14	62278581	62280300	shore:31627/island:17301/shore:31628/island:17302/shore:31629	intergenic.NA	0.000835074	hyper
chr9	120174951	120176710	shore:22176/island:12109	intron.ASTN2	0.000835074	hyper
chr5	3590111	3593100	shore:11971/island:6515/shore:11972/island:6516/shore:11973	1to5kb.IRX1/intergenic.NA	0.000842835	hyper
chr12	133480151	133482370	inter:12282/shelf:25858	1to5kb.NA/intergenic.NA	0.000842835	hyper
chr18	7116601	7118540	shore:39652/island:21753/shore:39653	promoter.LAMA1/CDS.LAMA1/5UTR.LAMA1/exon.LAMA1/intron.LAMA1	0.000845462	hyper
chr2	172971381	172973560	island:3586/shore:6625/island:3587/shore:6626	1to5kb.DLX2/intergenic.NA	0.000853303	hyper
chr8	104152411	104153970	shore:20313/island:11085/shore:20314	promoter.BAALC/promoter.BAALC-AS2/CDS.BAALC/5UTR.BAALC/5UTR.BAALC-AS2/exon.BAALC/exon.BAALC-AS2/intron.BAALC/intron.BAALC-AS2	0.000853303	hyper
chr10	94827801	94829330	shore:24320/island:13275/shore:24321	1to5kb.CYP26A1/CDS.CYP26C1/exon.CYP26C1/intron.CYP26C1	0.000853944	hyper
chr2	5812781	5814380	shore:4689/island:2541/shore:4690	intergenic.NA	0.000881589	hyper
chr5	145721871	145723210	shore:13273/island:7226/shore:13274	intergenic.NA	0.000903525	hyper
chr1	120904391	120906700	shore:2769/island:1505/shore:2770/island:1506/shore:2771	promoter.HIST2H2BA/promoter.NA/1to5kb.HIST2H2BA/1to5kb.NA/exon.HIST2H2BA/exon.NA/intron.HIST2H2BA	0.000918678	hyper
chr9	110247801	110248440	shore:22039	CDS.KLF4/exon.KLF4/intron.KLF4/3UTR.KLF4	0.00092307	hyper
chr17	77775511	77776130	island:21436	1to5kb.CBX8/intergenic.NA	0.000932598	hyper
chr12	115102281	115105730	shore:29331/island:16025/shore:29332/island:16026/shore:29333	intergenic.NA	0.000935847	hyper
chr19	52221591	52223500	shore:44247/island:24462/shore:44248	promoter.HAS1/1to5kb.HAS1/CDS.HAS1/5UTR.HAS1/exon.HAS1/intron.HAS1	0.000941262	hyper
chr16	213971	216960	shore:34052/island:18591/shore:34053	promoter.HBM/1to5kb.HBM/CDS.HBM/5UTR.HBM/exon.HBM/intron.HBM/3UTR.HBM/intergenic.NA	0.000960432	hyper
chr18	59000411	59002000	shore:40158/island:22016/shore:40159	promoter.CDH20/5UTR.CDH20/exon.CDH20/intron.CDH20	0.000968039	hyper
chr9	129372491	129373910	shore:22332/island:12192	1to5kb.LMX1B	0.000971198	hyper
chr18	27299771	27300260	inter:16135	intergenic.NA	0.000975137	hypo
chr22	50496181	50497620	shore:48105/island:26575/shore:48106	intergenic.NA	0.000983342	hyper
chr2	162272951	162274230	shore:6531/island:3531/shore:6532	promoter.TBR1/1to5kb.TBR1/CDS.TBR1/exon.TBR1/intron.TBR1	0.00101376	hyper
chr4	568031	571430	shore:9861/island:5326/shore:9862/island:5327	intergenic.NA	0.00101553	hyper
chr3	147141841	147142670	shore:9293/island:5025/shore:9294	intergenic.NA	0.00103233	hyper
chr7	45127731	45128700	shore:17274/island:9441/shore:17275/island:9442	promoter.NACAD/CDS.NACAD/exon.NACAD/intron.NACAD	0.00103653	hyper
chr9	32782541	32783970	shore:21173/island:11573/shore:21174	promoter.TMEM215/promoter.NA/1to5kb.NA/5UTR.TMEM215/exon.TMEM215/intron.TMEM215	0.00103742	hyper
chr5	15499771	15501200	shore:12060/island:6562/shore:12061	promoter.FBXL7/CDS.FBXL7/5UTR.FBXL7/exon.FBXL7/intron.FBXL7	0.00103895	hyper
chr3	126112951	126114350	shore:8957/island:4845/shore:8958	promoter.CFAP100/promoter.NA/1to5kb.CFAP100/5UTR.CFAP100/exon.CFAP100/exon.NA/intron.CFAP100/intron.NA	0.00103895	hyper
chr21	34391881	34392880	shore:46356/island:25638/shore:46357	intergenic.NA	0.00103895	hyper
chr16	4000351	4000830	inter:14109	intergenic.NA	0.00105449	hypo
chr7	749761	753050	shore:16320/island:8890/shore:16321/island:8891/shore:16322	promoter.PRKAR1B/CDS.PRKAR1B/5UTR.PRKAR1B/exon.PRKAR1B/intron.PRKAR1B	0.00105507	hyper
chr12	75602661	75603680	shore:28905/island:15797/shore:28906	promoter.KCNC2/5UTR.KCNC2/exon.KCNC2/intron.KCNC2	0.00105539	hyper
chr2	95522301	95524890	shore:5736/island:3105/shore:5737	promoter.ANKRD20A8P/1to5kb.ANKRD20A8P/exon.ANKRD20A8P/intron.ANKRD20A8P	0.00107074	hyper
chr6	99291101	99293070	shore:15324/island:8346/shore:15325/island:8347	intergenic.NA	0.00107325	hyper
chr1	156814221	156816680	shore:3316/island:1810/shore:3317	CDS.INSRR/exon.INSRR/intron.NTRK1/intron.INSRR	0.00107759	hyper
chr1	119521631	119523190	shore:2739/island:1488/shore:2740	intron.TBX15	0.00107759	hyper
chr5	1592991	1595490	shore:11903/island:6476/shore:11904	promoter.SDHAP3/CDS.SDHAP3/5UTR.SDHAP3/exon.SDHAP3/intron.SDHAP3	0.00109932	hyper
chr4	41746681	41750070	shore:10593/island:5749/shore:10594/island:5750/shore:10595	CDS.PHOX2B/exon.PHOX2B/intron.PHOX2B/3UTR.PHOX2B	0.00110058	hyper
chr9	34809311	34810590	shore:21247/island:11613/shore:21248	intergenic.NA	0.00110058	hyper
chr7	50342241	50344810	shore:17316/island:9463/shore:17317/island:9464/shore:17318	promoter.IKZF1/1to5kb.IKZF1/5UTR.IKZF1/exon.IKZF1/intron.IKZF1	0.00110094	hyper
chr7	1280501	1283030	island:8960/shore:16430	intergenic.NA	0.00110094	hyper
chr7	94284111	94287730	shore:17890/island:9770/shore:17891	promoter.PEG10/promoter.SGCE/1to5kb.PEG10/1to5kb.SGCE/CDS.PEG10/CDS.SGCE/5UTR.PEG10/5UTR.SGCE/exon.PEG10/exon.SGCE/intron.PEG10/intron.SGCE	0.00110564	hyper
chr16	31342211	31343880	shore:35336/island:19353/shore:35337	CDS.ITGAM/exon.ITGAM/intron.ITGAM/3UTR.ITGAM	0.00110801	hyper
chr9	124975451	124976240	shore:22233/island:12138	CDS.LHX6/exon.LHX6/intron.LHX6	0.00111792	hyper
chr16	66637551	66639710	shore:35745/island:19574/shore:35746	promoter.CMTM3/1to5kb.CMTM3/CDS.CMTM3/5UTR.CMTM3/exon.CMTM3/intron.CMTM3	0.00111875	hyper
chr2	132088331	132089260	inter:2649	intron.PLEKHB2	0.00112458	hyper
chr2	223161311	223162330	shore:7155/island:3882/shore:7156	promoter.CCDC140/1to5kb.CCDC140/CDS.PAX3/exon.PAX3/intron.PAX3	0.00112458	hyper
chr4	55990561	55992520	shore:10703/island:5810/shore:10704	promoter.KDR/CDS.KDR/5UTR.KDR/exon.KDR/intron.KDR	0.00114307	hyper
chr2	118593401	118595070	shore:6084/island:3289/shore:6085	intergenic.NA	0.00115591	hyper
chr19	10624241	10626100	shore:41839/island:23073/shore:41840	promoter.NA/CDS.S1PR5/CDS.NA/5UTR.S1PR5/exon.S1PR5/exon.NA/intron.S1PR5/3UTR.S1PR5	0.00116183	hyper
chr16	62068201	62071110	shore:35724/island:19562/shore:35725	promoter.CDH8/5UTR.CDH8/exon.CDH8/intron.CDH8	0.00116874	hyper
chr9	123656211	123657530	shore:22196/island:12119/shore:22197	intergenic.NA	0.00117479	hyper
chr6	26757131	26758970	inter:5940	promoter.NA/exon.NA/intergenic.NA	0.00118496	hyper
chr7	121946291	121947630	shore:18299	1to5kb.FEZF1/exon.FEZF1-AS1/intron.FEZF1-AS1	0.00119219	hyper
chr7	3339991	3342040	shore:16628/island:9075/shore:16629/island:9076/shore:16630	promoter.SDK1/1to5kb.SDK1/CDS.SDK1/5UTR.SDK1/exon.SDK1/intron.SDK1	0.0011964	hyper
chr13	53773971	53777240	shore:30506/island:16674/shore:30507	intergenic.NA	0.00119642	hyper
chr4	93224751	93227500	shore:10984/island:5957/shore:10985	promoter.GRID2/CDS.GRID2/5UTR.GRID2/exon.GRID2/intron.GRID2	0.00120279	hyper
chr18	67067281	67069530	shore:40196/island:22036/shore:40197	promoter.DOK6/1to5kb.DOK6/CDS.DOK6/5UTR.DOK6/exon.DOK6/intron.DOK6	0.00121625	hyper
chr12	114845581	114847920	shore:29322/island:16019/shore:29323	promoter.TBX5-AS1/promoter.TBX5/1to5kb.TBX5/5UTR.TBX5/exon.TBX5-AS1/exon.TBX5/intron.TBX5-AS1/intron.TBX5	0.0012208	hyper
chr16	89313841	89316510	island:20010/shore:36514/island:20011/shore:36515	intergenic.NA	0.00123269	hyper
chr10	35896251	35897720	shore:23619/island:12912/shore:23620	CDS.GJD4/exon.GJD4/intron.GJD4/3UTR.GJD4	0.0012492	hyper
chr20	2800831	2802410	shore:44875/island:24815/shore:44876	intergenic.NA	0.0012492	hyper
chr17	13503511	13506550	shore:37191/island:20387/shore:37192	promoter.HS3ST3A1/1to5kb.HS3ST3A1/CDS.HS3ST3A1/5UTR.HS3ST3A1/exon.HS3ST3A1/intron.HS3ST3A1	0.00125139	hyper
chr7	19151691	19152660	shore:16897/island:9230/shore:16898	intergenic.NA	0.00129026	hyper
chr6	26744981	26747620	inter:5940	promoter.NA/1to5kb.NA/exon.NA/intergenic.NA	0.00129261	hyper
chr2	48982331	48983230	shore:5235/island:2837/shore:5236	promoter.LHCGR/CDS.LHCGR/5UTR.LHCGR/exon.LHCGR/intron.STON1-GTF2A1L/intron.LHCGR	0.00129797	hyper
chr13	36704271	36706000	shore:30302/island:16566/shore:30303	promoter.DCLK1/5UTR.DCLK1/exon.DCLK1/intron.DCLK1	0.00130559	hyper
chr3	133392781	133394160	shore:9115/island:4927/shore:9116	intergenic.NA	0.00131088	hyper
chr15	29130121	29132490	shore:32702/island:17879/shore:32703	promoter.APBA2/1to5kb.APBA2/5UTR.APBA2/exon.APBA2/intron.APBA2	0.00131304	hyper
chr10	125650521	125651750	shore:24873/island:13584/shore:24874	promoter.CPXM2/CDS.CPXM2/5UTR.CPXM2/exon.CPXM2/intron.CPXM2	0.00131304	hyper
chr5	178420161	178422610	shore:13762/island:7492/shore:13763	promoter.GRM6/1to5kb.GRM6/CDS.GRM6/5UTR.GRM6/exon.GRM6/intron.GRM6	0.00133134	hyper
chr20	9486811	9490050	shore:44992/island:24878/shore:44993/shelf:37917	1to5kb.LAMP5/intergenic.NA	0.00133267	hyper
chr19	1761871	1763300	shore:40864/island:22474/shore:40865	intron.ONECUT3	0.00134449	hyper
chr21	34442031	34444770	shore:46361/island:25641/shore:46362	promoter.OLIG1/CDS.OLIG1/5UTR.OLIG1/exon.OLIG1/3UTR.OLIG1/intergenic.NA	0.00134449	hyper
chr11	31838331	31840300	island:14198/shore:25939/island:14199/shore:25940	promoter.PAX6/1to5kb.PAX6/5UTR.PAX6/exon.PAX6/intron.PAX6-AS1/intron.RCN1/intron.PAX6	0.00134595	hyper
chr6	150310201	150310830	shore:15807	intergenic.NA	0.00136674	hyper
chr1	50890311	50891720	island:1102/shore:2006	1to5kb.DMRTA2	0.00137075	hyper
chr3	128763771	128766450	shore:9047/island:4892/shore:9048	intergenic.NA	0.00137287	hyper
chr10	8078911	8079910	shore:23357	intergenic.NA	0.00137327	hyper
chr10	23479791	23482760	shore:23506/island:12852/shore:23507	promoter.PTF1A/1to5kb.PTF1A/CDS.PTF1A/exon.PTF1A/intron.PTF1A	0.00137699	hyper
chr15	68111771	68115030	shore:33347/island:18219/shore:33348	promoter.SKOR1/CDS.SKOR1/exon.SKOR1/intron.SKOR1	0.00138288	hyper
chr1	75600111	75603220	shore:2274/island:1243/shore:2275/island:1244/shore:2276	promoter.LHX8/1to5kb.NA/CDS.LHX8/5UTR.LHX8/exon.LHX8/intron.LHX8	0.00138302	hyper
chr12	95941601	95943400	shore:29007/island:15849/shore:29008	promoter.USP44/1to5kb.USP44/5UTR.USP44/exon.USP44/intron.USP44	0.00139241	hyper
chr10	100995591	100996850	shore:24423/shelf:21165	promoter.HPSE2/1to5kb.HPSE2/5UTR.HPSE2/exon.HPSE2	0.0014061	hyper
chr9	117149621	117150680	inter:9149	promoter.AKNA/5UTR.AKNA/exon.AKNA/intron.AKNA	0.00141227	hyper
chr9	974241	978160	shore:20950/island:11453/shore:20951	promoter.DMRT3/1to5kb.DMRT3/CDS.DMRT3/5UTR.DMRT3/exon.DMRT3/intron.DMRT3	0.00141425	hyper
chr6	1383211	1386280	island:7588/shore:13933	1to5kb.FOXF2/intergenic.NA	0.00141425	hyper
chr6	159589381	159591570	shore:15915/island:8665/shore:15916	promoter.FNDC1/1to5kb.FNDC1/CDS.FNDC1/5UTR.FNDC1/exon.FNDC1/intron.FNDC1	0.00142546	hyper
chr12	49729351	49730730	shore:28372/island:15508	CDS.C1QL4/5UTR.C1QL4/exon.C1QL4/intron.C1QL4	0.00142633	hyper
chr7	27181131	27185890	shore:17017/island:9298/shore:17018	promoter.HOXA-AS3/promoter.HOXA5/1to5kb.HOXA-AS3/1to5kb.HOXA5/CDS.HOXA5/CDS.HOXA6/5UTR.HOXA5/exon.HOXA5/exon.HOXA6/intron.HOXA-AS3/intron.HOXA5/intron.HOXA6/3UTR.HOXA5/3UTR.HOXA6	0.00142807	hyper
chr7	149744081	149746800	shore:18641/island:10167/shore:18642	intergenic.NA	0.00143754	hyper
chr19	31843581	31844460	shore:42785/island:23608/shore:42786	1to5kb.TSHZ3	0.00144407	hyper
chr11	45376671	45377460	shore:26064/island:14269/shore:26065	intergenic.NA	0.0014475	hyper
chr7	64337521	64339110	inter:7200	1to5kb.ZNF273/intron.NA	0.0014475	hyper
chr7	69062091	69065380	shore:17593/island:9615/shore:17594	promoter.AUTS2/1to5kb.AUTS2/CDS.AUTS2/5UTR.AUTS2/exon.AUTS2/intron.AUTS2	0.00144941	hyper
chr1	10731031	10733880	inter:210	intron.CASZ1	0.00146856	hyper
chr4	4871641	4872440	shore:10244	intergenic.NA	0.00146865	hyper
chr6	85472011	85477570	shore:15241/island:8302/shore:15242/shelf:13259	promoter.TBX18/1to5kb.TBX18/CDS.TBX18/5UTR.TBX18/exon.TBX18/intron.TBX18	0.00150111	hyper
chr1	148760131	148762260	shore:2951/island:1610/shore:2952	promoter.NA/1to5kb.NA/exon.NA/intergenic.NA	0.00150642	hyper
chr6	146754951	146756170	shore:15757/island:8583/shore:15758	CDS.GRM1/exon.GRM1/intron.GRM1/3UTR.GRM1	0.00154455	hyper
chr9	70917201	70919680	shore:21567/island:11779/shore:21568	promoter.FOXD4L3/CDS.FOXD4L3/5UTR.FOXD4L3/exon.FOXD4L3/3UTR.FOXD4L3	0.00155928	hyper
chr11	31841011	31842450	shore:25940/island:14200/shore:25941	1to5kb.PAX6/intron.PAX6-AS1/intron.RCN1	0.00156024	hyper
chr19	21182471	21183340	inter:16989	intergenic.NA	0.00156024	hyper
chr9	133884291	133885740	shore:22594/island:12329/shore:22595	promoter.LAMC3/CDS.LAMC3/5UTR.LAMC3/exon.LAMC3/intron.LAMC3	0.00156024	hyper
chr17	74069301	74073850	shore:38943/island:21347/shore:38944	promoter.GALR2/promoter.SRP68/1to5kb.GALR2/1to5kb.ZACN/1to5kb.SRP68/CDS.GALR2/5UTR.GALR2/exon.GALR2/intron.GALR2/3UTR.GALR2	0.00159767	hyper
chr10	102472971	102474270	shore:24483/island:13365/shore:24484	intergenic.NA	0.00160337	hyper
chr19	57682901	57684440	shore:44614/island:24673/shore:44615	1to5kb.DUXA/intergenic.NA	0.00161363	hyper
chr11	122849231	122851100	shore:27544	CDS.BSX/exon.BSX/intron.BSX	0.00161677	hyper
chr7	86272971	86273590	inter:7343	promoter.GRM3/5UTR.GRM3/exon.GRM3	0.00162111	hyper
chr2	45028031	45030700	shore:5165/island:2796/shore:5166/island:2797/shore:5167	intergenic.NA	0.00162111	hyper
chr1	86620171	86623180	shore:2353/island:1285/shore:2354	promoter.COL24A1/1to5kb.COL24A1/CDS.COL24A1/5UTR.COL24A1/exon.COL24A1/intron.COL24A1	0.00162165	hyper
chr9	139090181	139092900	shore:22869/island:12482	1to5kb.NA/CDS.LHX3/5UTR.LHX3/exon.LHX3/intron.LHX3	0.0016278	hyper
chr19	48917361	48919750	shore:43895/island:24251/shore:43896/island:24252/shore:43897	1to5kb.GRIN2D/CDS.GRIN2D/exon.GRIN2D/intron.GRIN2D	0.00162813	hyper
chr14	61103691	61105010	shore:31605/island:17290/shore:31606	intergenic.NA	0.00162835	hyper
chr3	138655301	138656330	island:4970/shore:9195	exon.NA	0.00165767	hyper
chr4	190643231	190644260	inter:4901	intergenic.NA	0.00166287	hypo
chr3	132756501	132758140	shore:9109/island:4924/shore:9110	promoter.TMEM108/5UTR.TMEM108/exon.TMEM108/intron.TMEM108	0.00166955	hyper
chr19	37095411	37096940	shore:43044/island:23757/shore:43045	promoter.ZNF382/promoter.ZNF529/1to5kb.ZNF382/5UTR.ZNF382/5UTR.ZNF529/exon.ZNF382/exon.ZNF529/intron.ZNF382/intron.ZNF529	0.0016714	hyper
chr11	109292521	109295410	shore:27309/island:14946/shore:27310	promoter.C11orf87/promoter.NA/1to5kb.NA/CDS.C11orf87/CDS.NA/5UTR.C11orf87/exon.C11orf87/exon.NA/intron.C11orf87/3UTR.C11orf87	0.00169734	hyper
chr19	39737361	39739680	shore:43219/island:23859/shore:43220	promoter.IFNL4/1to5kb.IFNL3/CDS.IFNL4/5UTR.IFNL4/exon.IFNL4/intron.IFNL4/3UTR.IFNL4	0.00170595	hyper
chr1	147504771	147506570	shore:2897/island:1577/shore:2898	promoter.NA/exon.NA/intergenic.NA	0.00171247	hyper
chr19	17500971	17501770	shore:42388	intergenic.NA	0.00173405	hyper
chr17	8924961	8927230	island:20365/shore:37148	CDS.NTN1/5UTR.NTN1/exon.NTN1/intron.NTN1	0.00173405	hyper
chr4	111535201	111537540	shore:11094/shelf:9725/shore:11095	intergenic.NA	0.00173453	hyper
chr19	12305261	12306860	shore:41994/island:23156/shore:41995	promoter.NA/exon.NA/intron.NA	0.00173453	hyper
chr19	21645331	21647610	shore:42664/island:23543/shore:42665	promoter.NA/exon.NA/intron.NA	0.00176605	hyper
chr3	10857331	10858750	shore:7753/island:4208/shore:7754	promoter.SLC6A11/CDS.SLC6A11/5UTR.SLC6A11/exon.SLC6A11/intron.SLC6A11	0.00176612	hyper
chr10	1778551	1780270	shore:23270/island:12726/shore:23271	promoter.ADARB2/CDS.ADARB2/5UTR.ADARB2/exon.ADARB2/intron.ADARB2	0.0017728	hyper
chr1	246951631	246953350	shore:4497/island:2437/shore:4498	promoter.LINC01341/1to5kb.LINC01341/exon.LINC01341/intron.LINC01341	0.00177686	hyper
chr3	153839601	153841090	island:5048/shore:9340	promoter.ARHGEF26-AS1/1to5kb.ARHGEF26-AS1/CDS.ARHGEF26/5UTR.ARHGEF26/exon.ARHGEF26/intron.ARHGEF26	0.00179675	hyper
chr15	30395401	30397870	shore:32722/island:17890/shore:32723	promoter.ULK4P3/1to5kb.NA/exon.ULK4P3/intron.ULK4P3	0.00179693	hyper
chr17	26698711	26699910	island:20553/shore:37501	promoter.SARM1/1to5kb.VTN/CDS.SARM1/5UTR.SARM1/exon.SARM1/intron.SARM1	0.00180049	hyper
chr12	52626431	52627920	shore:28487/island:15568/shore:28488	promoter.KRT7/CDS.KRT7/5UTR.KRT7/exon.KRT7/intron.KRT7	0.00180049	hyper
chr2	210636041	210637280	shore:6976/island:3781/shore:6977	promoter.UNC80/CDS.UNC80/5UTR.UNC80/exon.UNC80/intron.UNC80	0.00180349	hyper
chr3	138679021	138679880	shore:9200/island:4974/shore:9201	intergenic.NA	0.00181614	hyper
chr22	19705901	19706990	island:25991/shore:47000	promoter.SEPT5-GP1BB/CDS.SEPT5-GP1BB/5UTR.SEPT5-GP1BB/exon.SEPT5-GP1BB/intron.SEPT5-GP1BB	0.00182537	hyper
chr17	74864451	74866820	island:21370/shore:38988	promoter.MGAT5B/1to5kb.MGAT5B/CDS.MGAT5B/5UTR.MGAT5B/exon.MGAT5B/intron.MGAT5B	0.0018359	hyper
chr20	25063531	25066560	shore:45139/island:24963/shore:45140	promoter.VSX1/1to5kb.VSX1	0.00183843	hyper
chr4	174439481	174441010	shore:11514/island:6248/shore:11515	intergenic.NA	0.00185103	hyper
chr12	54338541	54339820	shore:28578/island:15616/shore:28579	CDS.HOXC13/exon.HOXC13/intron.HOXC13/3UTR.HOXC13	0.00186711	hyper
chr16	54321341	54325960	island:19488/shore:35590/island:19489/shore:35591	promoter.IRX3/1to5kb.IRX3/intergenic.NA	0.00189549	hyper
chr16	30105861	30107040	shore:35207	promoter.NA/1to5kb.NA/1to5kb.TBX6/CDS.YPEL3/5UTR.YPEL3/exon.YPEL3/intron.BOLA2/intron.YPEL3/3UTR.YPEL3	0.00189871	hyper
chr4	5891751	5895400	shore:10257/island:5569/shore:10258/island:5570/shore:10259	promoter.CRMP1/1to5kb.CRMP1/CDS.CRMP1/5UTR.CRMP1/exon.CRMP1/intron.CRMP1	0.00190732	hyper
chr20	9496131	9497790	shore:44995/island:24880/shore:44996	CDS.LAMP5/exon.LAMP5/intron.LAMP5	0.00191888	hyper
chr2	69239901	69241230	shore:5402/island:2928/shore:5403	promoter.ANTXR1/CDS.ANTXR1/5UTR.ANTXR1/exon.ANTXR1/intron.ANTXR1	0.00197143	hyper
chr4	177712941	177714700	shore:11540/island:6263/shore:11541	promoter.VEGFC/CDS.VEGFC/5UTR.VEGFC/exon.VEGFC/intron.VEGFC	0.00197534	hyper
chr11	40314481	40315860	inter:10657	promoter.LRRC4C/1to5kb.LRRC4C/5UTR.LRRC4C/exon.LRRC4C/intron.LRRC4C	0.00197638	hyper
chr6	75914381	75915410	shore:15187/island:8274	1to5kb.COL12A1/intron.COL12A1	0.00198165	hyper
chr1	38099421	38100150	shore:1622/island:899	intron.RSPO1	0.0019955	hyper
chr7	44184271	44185850	shore:17240/island:9423/shore:17241	1to5kb.MYL7/CDS.GCK/exon.GCK/intron.GCK/3UTR.GCK	0.00201216	hyper
chr20	21681671	21684720	shelf:38007/shore:45098/island:24937/shore:45099	1to5kb.PAX1	0.00201826	hyper
chr17	74532941	74534980	shore:38972/island:21362/shore:38973	promoter.CYGB/1to5kb.PRCD/1to5kb.NA/CDS.CYGB/5UTR.CYGB/exon.CYGB/intron.PRCD/intron.CYGB	0.00202426	hyper
chr4	681981	683390	shore:9881/island:5340/shore:9882	promoter.SLC49A3/1to5kb.SLC49A3/CDS.SLC49A3/5UTR.SLC49A3/exon.SLC49A3/intron.SLC49A3	0.00204078	hyper
chr16	31367991	31368210	inter:14380	1to5kb.ITGAX/CDS.ITGAX/exon.ITGAX/intron.ITGAX	0.00204603	hypo
chr19	46001701	46002830	shore:43658/island:24116/shore:43659	promoter.PPM1N/1to5kb.PPM1N/1to5kb.RTN2/CDS.PPM1N/exon.PPM1N/intron.PPM1N	0.00206433	hyper
chr13	53423501	53424370	shore:30504	promoter.PCDH8/1to5kb.PCDH8	0.00208352	hyper
chr1	236227031	236229310	shore:4378/island:2374/shore:4379	promoter.NA/promoter.NID1/CDS.NA/CDS.NID1/5UTR.NA/5UTR.NID1/exon.NA/exon.NID1/intron.NID1/3UTR.NA	0.00210561	hyper
chr15	102285301	102287330	shore:34032/island:18581/shore:34033	promoter.NA/5UTR.NA/exon.NA/intron.NA	0.00212454	hyper
chr5	16666491	16667170	inter:5039	CDS.MYO10/exon.MYO10/intron.MYO10/3UTR.MYO10	0.00214513	hyper
chr4	122301191	122302560	shore:11163/island:6054/shore:11164	promoter.QRFPR/CDS.QRFPR/5UTR.QRFPR/exon.QRFPR/intron.QRFPR	0.00218321	hyper
chr13	111767631	111768750	inter:12630	CDS.ARHGEF7/5UTR.ARHGEF7/exon.ARHGEF7/intron.ARHGEF7	0.00219501	hyper
chr1	65990731	65992090	shore:2216/island:1212/shore:2217	promoter.LEPR/5UTR.LEPR/exon.LEPR/intron.LEPR	0.00221554	hyper
chr6	101846481	101847990	shore:15374/island:8379/shore:15375	promoter.GRIK2/CDS.GRIK2/5UTR.GRIK2/exon.NA/exon.GRIK2/intron.NA/intron.GRIK2	0.00222039	hyper
chr11	112831811	112834730	shore:27350/island:14967/shore:27351	promoter.NCAM1/promoter.NA/CDS.NCAM1/5UTR.NCAM1/exon.NCAM1/exon.NA/intron.NCAM1/intron.NA	0.00222039	hyper
chr3	63263561	63265070	shore:8555/island:4640/shore:8556	promoter.SYNPR/CDS.SYNPR/5UTR.SYNPR/exon.SYNPR/intron.SYNPR	0.00222039	hyper
chr15	89345821	89347460	shore:33770/island:18439/shore:33771	promoter.ACAN/5UTR.ACAN/exon.ACAN/intron.ACAN	0.00222039	hyper
chr17	44896091	44897900	island:20951/shore:38225	promoter.WNT3/1to5kb.WNT3/5UTR.WNT3/exon.WNT3	0.00222196	hyper
chr1	46950871	46952050	shore:1938/island:1064/shore:1939	intergenic.NA	0.00224526	hyper
chr1	71511421	71513930	shore:2262/island:1236/shore:2263	promoter.ZRANB2-AS1/promoter.PTGER3/CDS.PTGER3/5UTR.PTGER3/exon.ZRANB2-AS1/exon.PTGER3/intron.ZRANB2-AS1/intron.PTGER3	0.00225209	hyper
chr15	99303591	99304140	inter:13943	intron.IGF1R	0.00227205	hyper
chr20	44036771	44037530	shore:45524	CDS.SYS1-DBNDD2/CDS.DBNDD2/5UTR.SYS1-DBNDD2/5UTR.DBNDD2/exon.SYS1-DBNDD2/exon.DBNDD2/intron.SYS1-DBNDD2/intron.DBNDD2	0.00227764	hyper
chr19	49670871	49672310	shore:44006/shelf:37136	CDS.TRPM4/5UTR.TRPM4/exon.TRPM4/intron.TRPM4	0.00227764	hyper
chr1	147998981	148001090	shore:2937/island:1601/shore:2938	promoter.NA/1to5kb.NA/exon.NA/intron.NBPF8/intron.LINC01138	0.00228199	hyper
chr20	60540021	60541040	shore:45858/island:25345/shore:45859	intergenic.NA	0.00228248	hyper
chr1	91181771	91185910	shore:2395/island:1308/shore:2396/island:1309/shore:2397/island:1310/shore:2398/island:1311/shore:2399	promoter.BARHL2/1to5kb.BARHL2/CDS.BARHL2/5UTR.BARHL2/exon.BARHL2/intron.BARHL2	0.00228248	hyper
chr8	143545201	143546770	shore:20601/island:11240/shore:20602	promoter.ADGRB1/CDS.ADGRB1/5UTR.ADGRB1/exon.ADGRB1/intron.ADGRB1	0.00228809	hyper
chr3	128209001	128212810	island:4877/shore:9020	promoter.GATA2/1to5kb.GATA2/5UTR.GATA2/exon.GATA2/intron.GATA2	0.00229144	hyper
chr5	2747441	2753860	shore:11958/island:6508	promoter.C5orf38/promoter.IRX2/1to5kb.C5orf38/1to5kb.IRX2/CDS.C5orf38/CDS.IRX2/5UTR.C5orf38/5UTR.IRX2/exon.C5orf38/exon.IRX2/intron.C5orf38/intron.IRX2/3UTR.C5orf38/3UTR.IRX2	0.00229482	hyper
chr19	54444991	54446430	shore:44376/island:24532/shore:44377	CDS.CACNG7/exon.CACNG7/intron.CACNG7/3UTR.CACNG7	0.0023117	hyper
chr13	103052051	103053690	shore:30699/island:16782/shore:30700	intron.FGF14	0.00232768	hyper
chr1	148246281	148248410	shore:2943/island:1605/shore:2944	promoter.NA/1to5kb.NA/exon.NA/intron.NBPF8/intron.NBPF14/intron.NBPF9	0.00233185	hyper
chr6	17280451	17281670	shore:14161/island:7719	promoter.RBM24/1to5kb.RBM24	0.00233413	hyper
chr4	6473361	6474740	island:5580/shore:10279	promoter.PPP2R2C/CDS.PPP2R2C/5UTR.PPP2R2C/exon.PPP2R2C/intron.PPP2R2C	0.00239173	hyper
chr12	50297121	50298720	shore:28400/island:15523/shore:28401	promoter.FAIM2/1to5kb.FAIM2/CDS.FAIM2/5UTR.FAIM2/exon.FAIM2/intron.FAIM2	0.00240296	hyper
chr6	166578811	166579470	shore:15991	CDS.TBXT/exon.TBXT/intron.TBXT	0.00242163	hyper
chr1	205312101	205313320	shore:3864/island:2096	CDS.KLHDC8A/5UTR.KLHDC8A/exon.KLHDC8A/intron.KLHDC8A	0.00244009	hyper
chr15	65115371	65117090	shore:33263/island:18176/shore:33264	1to5kb.PIF1/CDS.PIF1/5UTR.PIF1/exon.PIF1/intron.PIF1	0.00244184	hyper
chr10	104169931	104171070	shore:24591/island:13433/shore:24592	promoter.PSD/1to5kb.PSD/CDS.PSD/exon.PSD/intron.PSD	0.00244949	hyper
chr2	45181491	45182700	shore:5176/island:2805	intergenic.NA	0.00250699	hyper
chr5	76923451	76924720	shore:12494/island:6794/shore:12495	exon.OTP/3UTR.OTP/intergenic.NA	0.00251129	hyper
chr11	131780031	131781990	shore:27691/island:15147/shore:27692	promoter.NTM/CDS.NTM/5UTR.NTM/exon.NTM/intron.NTM	0.00251161	hyper
chr22	38477641	38479600	island:26288/shore:47564	promoter.SLC16A8/CDS.SLC16A8/5UTR.SLC16A8/exon.SLC16A8/intron.SLC16A8	0.00251249	hyper
chr3	22413301	22414660	shore:7903/island:4287/shore:7904	promoter.ZNF385D/exon.ZNF385D/intron.ZNF385D	0.00253111	hyper
chr16	88493331	88499110	shelf:31231/shore:36355/island:19909/shore:36356/island:19910/shore:36357	promoter.ZNF469/CDS.ZNF469/exon.ZNF469/intron.ZNF469	0.0025654	hyper
chr2	130749811	130751810	shore:6268/island:3392/shore:6269	intergenic.NA	0.00257255	hyper
chr1	197888551	197889960	shore:3716	CDS.LHX9/exon.LHX9/intron.LHX9	0.00258823	hyper
chr5	158527271	158528290	shore:13424/island:7306/shore:13425	promoter.NA/promoter.EBF1/1to5kb.EBF1/exon.NA/intron.NA	0.00259681	hyper
chr7	32467081	32468660	shore:17109/island:9354/shore:17110	intergenic.NA	0.00259731	hyper
chr10	101292501	101295130	island:13337/shore:24436/island:13338/shore:24437/island:13339	promoter.NKX2-3/1to5kb.NA/CDS.NKX2-3/5UTR.NKX2-3/exon.NKX2-3/intron.NKX2-3	0.0026124	hyper
chr8	67089051	67091010	shore:19973/island:10906/shore:19974	promoter.CRH/promoter.NA/1to5kb.NA/CDS.CRH/CDS.NA/5UTR.CRH/exon.CRH/exon.NA/intron.CRH/3UTR.CRH	0.00261311	hyper
chr17	66595791	66597760	shore:38767/island:21252/shore:38768	promoter.FAM20A/CDS.FAM20A/5UTR.FAM20A/exon.FAM20A/intron.FAM20A	0.00265654	hyper
chr1	237204821	237206940	shore:4397/island:2384/shore:4398	promoter.RYR2/CDS.RYR2/5UTR.RYR2/exon.RYR2/intron.RYR2	0.00266511	hyper
chr20	55203971	55207180	island:25276/shore:45730	promoter.TFAP2C/1to5kb.TFAP2C/CDS.TFAP2C/5UTR.TFAP2C/exon.TFAP2C/intron.TFAP2C	0.00270497	hyper
chr12	43944431	43946600	shore:28253/island:15443/shore:28254	promoter.ADAMTS20/CDS.ADAMTS20/exon.ADAMTS20/intron.ADAMTS20	0.00271353	hyper
chr6	50813021	50814030	shore:15048/island:8201/shore:15049	exon.TFAP2B/3UTR.TFAP2B	0.00271486	hyper
chr20	5295991	5298120	shore:44965/island:24864/shore:44966	promoter.NA/promoter.PROKR2/1to5kb.PROKR2/CDS.NA/5UTR.NA/5UTR.PROKR2/exon.NA/exon.PROKR2/intron.PROKR2/3UTR.NA	0.00272585	hyper
chr13	100623801	100625130	island:16768/shore:30675	promoter.ZIC5/CDS.ZIC5/5UTR.ZIC5/exon.ZIC5	0.0027351	hyper
chr22	20791531	20793000	island:26036/shore:47079	promoter.SCARF2/CDS.SCARF2/5UTR.SCARF2/exon.SCARF2/intron.SCARF2	0.0027351	hyper
chr19	54926131	54927300	shore:44409	promoter.TTYH1/1to5kb.TTYH1/CDS.TTYH1/5UTR.TTYH1/exon.TTYH1/intron.TTYH1	0.00276423	hyper
chr11	65600441	65601810	shore:26612/island:14572/shore:26613	promoter.SNX32/CDS.SNX32/5UTR.SNX32/exon.SNX32/intron.SNX32	0.00278933	hyper
chr10	102982861	102985040	island:13402/shore:24540/island:13403	1to5kb.LBX1-AS1/intergenic.NA	0.00279112	hyper
chr10	134594611	134602710	shore:25090/island:13701/shore:25091/island:13702/shore:25092	promoter.NKX6-2/1to5kb.NKX6-2/CDS.INPP5A/CDS.NKX6-2/5UTR.NKX6-2/exon.INPP5A/exon.NKX6-2/intron.INPP5A/intron.NKX6-2/3UTR.INPP5A/3UTR.NKX6-2/intergenic.NA	0.00279661	hyper
chr3	169540051	169540740	inter:3985	CDS.LRRIQ4/exon.LRRIQ4/intron.LRRIQ4	0.00281527	hypo
chr3	47048871	47052220	shore:8200/island:4445/shore:8201	promoter.NRADDP/1to5kb.NRADDP/CDS.NBEAL2/exon.NBEAL2/intron.NBEAL2/3UTR.NBEAL2	0.00283656	hyper
chr12	114885891	114886840	shore:29329/island:16024/shore:29330	intergenic.NA	0.00283978	hyper
chr6	129204011	129204830	inter:6480	promoter.LAMA2/CDS.LAMA2/5UTR.LAMA2/exon.LAMA2/intron.LAMA2	0.00283978	hyper
chr17	33813941	33816490	shore:37686/island:20654/shore:37687	promoter.SLFN12L/1to5kb.NA/1to5kb.SLFN12L/CDS.SLFN12L/exon.SLFN12L/intron.SLFN12L	0.0028724	hyper
chr1	155146941	155148360	shore:3211/island:1753/shore:3212	promoter.TRIM46/1to5kb.KRTCAP2/CDS.TRIM46/5UTR.TRIM46/exon.TRIM46/intron.TRIM46/3UTR.TRIM46	0.0028724	hyper
chr19	39588891	39590230	inter:17199	CDS.ACP7/exon.ACP7/intron.ACP7	0.00295053	hyper
chr1	17841081	17841750	inter:309	intergenic.NA	0.00298414	hyper
chr10	128075441	128078170	shore:24926/island:13612/shore:24927	promoter.ADAM12/1to5kb.ADAM12/CDS.ADAM12/5UTR.ADAM12/exon.ADAM12/intron.ADAM12	0.00299545	hyper
chr19	56904351	56905910	shore:44574/island:24652/shore:44575	promoter.ZNF582-AS1/promoter.ZNF582/1to5kb.ZNF582/CDS.ZNF582/5UTR.ZNF582/exon.ZNF582-AS1/exon.ZNF582/intron.ZNF582-AS1/intron.ZNF582	0.00302844	hyper
chr11	19366551	19368430	shore:25867/island:14157/shore:25868	1to5kb.NAV2/intergenic.NA	0.00305948	hyper
chr9	126775861	126776610	island:12157	1to5kb.NA/CDS.LHX2/exon.LHX2/intron.LHX2	0.00305948	hyper
chr17	43044101	43045640	shore:38144/island:20908	CDS.C1QL1/5UTR.C1QL1/exon.C1QL1/intron.C1QL1	0.00305948	hyper
chr5	175487251	175490130	shore:13593/island:7400/shore:13594	promoter.FAM153B/promoter.NA/1to5kb.FAM153B/1to5kb.NA/5UTR.FAM153B/exon.FAM153B/exon.NA/intron.FAM153B/intron.NA	0.00305948	hyper
chr11	8189771	8191080	shore:25682/island:14059/shore:25683	promoter.RIC3/CDS.RIC3/5UTR.RIC3/exon.RIC3/intron.RIC3	0.0030803	hyper
chr12	85667051	85667920	inter:11889	intergenic.NA	0.00309835	hyper
chr20	55967371	55968590	shore:45747	CDS.RBM38/exon.RBM38/intron.NA/intron.RBM38	0.00316947	hyper
chr10	28029751	28030880	shore:23556/island:12880	CDS.MKX/exon.MKX/intron.MKX	0.00317723	hyper
chr13	21519571	21521030	shore:30067/island:16438/shore:30068	intergenic.NA	0.00322434	hyper
chr9	21976001	21976930	shore:21126	promoter.CDKN2A/1to5kb.CDKN2A/intron.MTAP/intron.CDKN2A	0.0032904	hyper
chr13	23733021	23735100	shore:30114/island:16463/shore:30115	intergenic.NA	0.00332394	hyper
chr12	115172111	115174470	shore:29344/island:16034	intergenic.NA	0.00338064	hyper
chr1	63788161	63790690	island:1195/shore:2184	promoter.FOXD3/CDS.FOXD3/exon.FOXD3/3UTR.FOXD3	0.00338064	hyper
chr1	184005071	184006950	shore:3671/island:1994/shore:3672	promoter.COLGALT2/CDS.COLGALT2/5UTR.COLGALT2/exon.COLGALT2/intron.COLGALT2	0.00339083	hyper
chr7	98245501	98248010	shore:17953/island:9805/shore:17954	promoter.NPTX2/1to5kb.NPTX2/CDS.NPTX2/5UTR.NPTX2/exon.NPTX2/intron.NPTX2	0.00339123	hyper
chr7	149487001	149488430	shore:18633/island:10163/shore:18634	CDS.SSPO/exon.SSPO/intron.SSPO	0.00340969	hyper
chr1	3566951	3568430	island:281	promoter.TP73/promoter.WRAP73/1to5kb.TP73/1to5kb.WRAP73	0.0034098	hyper
chr4	4144011	4145830	shore:10221/island:5546/shore:10222	intergenic.NA	0.00343375	hyper
chr1	3162151	3165460	shore:408/island:251/shore:409	intron.PRDM16	0.00345291	hyper
chr5	133448481	133450130	shore:12892/island:7007	promoter.TCF7/1to5kb.TCF7	0.00350724	hyper
chr20	21083471	21085320	shore:45084/island:24929/shore:45085	intergenic.NA	0.00352337	hyper
chr22	51158071	51161260	shore:48203/island:26639/shore:48204	CDS.SHANK3/exon.SHANK3/intron.SHANK3/3UTR.SHANK3	0.00352677	hyper
chr20	21085431	21087520	shore:45085/island:24930/shore:45086	intergenic.NA	0.00353806	hyper
chr19	17137021	17138020	inter:16883	promoter.CPAMD8/CDS.CPAMD8/5UTR.CPAMD8/exon.CPAMD8/intron.CPAMD8	0.00354781	hyper
chr18	57363461	57364840	shore:40152/island:22013	promoter.CCBE1/CDS.CCBE1/5UTR.CCBE1/exon.CCBE1/intron.CCBE1	0.00357231	hyper
chr14	100258821	100259690	shore:32143/island:17570/shore:32144	promoter.EML1/intron.EML1	0.00358771	hyper
chr11	47358751	47359580	shore:26131	CDS.MYBPC3/exon.MYBPC3/intron.MYBPC3	0.00359893	hypo
chr11	65358351	65361520	shore:26583/island:14556/shore:26584	CDS.EHBP1L1/CDS.KCNK7/exon.EHBP1L1/exon.KCNK7/intron.EHBP1L1/intron.KCNK7/3UTR.EHBP1L1/3UTR.KCNK7/intergenic.NA	0.00359893	hyper
chr13	50796531	50797220	inter:12500	intron.DLEU1/intron.NA	0.00361809	hyper
chr14	104927201	104928800	shore:32353/island:17685/shore:32354	intergenic.NA	0.00363256	hyper
chr19	4278851	4280520	shore:41302/island:22754/shore:41303	CDS.SHD/5UTR.SHD/exon.SHD/intron.SHD	0.00367197	hyper
chr6	26689471	26690430	shore:14301/island:7798/shore:14302	intergenic.NA	0.00368214	hyper
chr12	53868461	53869120	inter:11731	intron.PCBP2	0.00368214	hyper
chr15	78911971	78914000	shore:33597/island:18351/shore:33598	promoter.CHRNA3/1to5kb.NA/CDS.CHRNA3/5UTR.CHRNA3/exon.CHRNA3/intron.CHRNA3	0.00370071	hyper
chr13	49792041	49795830	shelf:26275/shore:30436/island:16637/shore:30437	promoter.MLNR/1to5kb.MLNR/CDS.MLNR/exon.MLNR/intron.MLNR	0.00371303	hyper
chr2	121492591	121493360	shore:6156/island:3332	promoter.GLI2/1to5kb.GLI2/5UTR.GLI2/exon.GLI2/intron.GLI2	0.00371629	hyper
chr19	37264021	37264690	island:23760/shore:43051	promoter.NA/promoter.ZNF850/1to5kb.NA/CDS.NA/5UTR.NA/exon.NA/intron.NA	0.00371832	hyper
chr2	95663601	95664730	shore:5742/island:3109/shore:5743	intergenic.NA	0.00373325	hyper
chr7	27162831	27164520	shore:17012/island:9295/shore:17013	1to5kb.HOXA3/exon.NA/intron.NA/intron.HOXA3	0.00374547	hyper
chr14	85999231	86001400	shore:31949/island:17468/shore:31950	1to5kb.NA/intron.FLRT2	0.00377745	hyper
chr9	981401	982050	shelf:18098/inter:8609	intron.DMRT3	0.00379227	hyper
chr7	54612001	54612890	shore:17343/island:9478/shore:17344	CDS.VSTM2A/exon.VSTM2A/intron.VSTM2A	0.00380682	hyper
chr10	72043101	72044130	shore:24022/island:13118/shore:24023	promoter.NPFFR1/CDS.NPFFR1/5UTR.NPFFR1/exon.NPFFR1/intron.NPFFR1	0.00380682	hyper
chr14	29228621	29229700	inter:12802	intergenic.NA	0.00380747	hyper
chr3	156008801	156010170	shore:9357/island:5057/shore:9358	CDS.KCNAB1/5UTR.KCNAB1/exon.KCNAB1/intron.KCNAB1	0.00381984	hyper
chr6	146348581	146351160	shore:15755/island:8582/shore:15756	promoter.GRM1/1to5kb.GRM1/CDS.GRM1/5UTR.GRM1/exon.GRM1/intron.GRM1	0.00383492	hyper
chr1	21754181	21756580	shore:1050/island:599/shore:1051	promoter.NA/1to5kb.NA/exon.NA/intron.NA	0.00386041	hyper
chr12	54328981	54330610	shelf:24688	1to5kb.HOXC13/exon.HOXC13-AS/intron.HOXC13-AS	0.0039031	hyper
chr22	33453621	33454760	shore:47445/island:26228/shore:47446	promoter.SYN3/5UTR.SYN3/exon.SYN3/intron.SYN3	0.00392146	hyper
chr17	36734331	36735530	shore:37799/island:20717/shore:37800	CDS.SRCIN1/exon.SRCIN1/intron.SRCIN1	0.00392592	hyper
chr18	35144631	35148130	shore:39961/island:21912/shore:39962	promoter.CELF4/1to5kb.CELF4/CDS.CELF4/5UTR.CELF4/exon.CELF4/intron.CELF4	0.00392938	hyper
chr3	36805121	36806510	shore:7997/island:4338/shore:7998	intergenic.NA	0.00394659	hyper
chr2	231732471	231733040	shore:7224/shelf:6320	intron.ITM2C	0.00396984	hyper
chr7	27278481	27279910	shore:17046/island:9319/shore:17047	1to5kb.EVX1	0.00397227	hyper
chr4	155253701	155254860	shore:11399/island:6187/shore:11400	CDS.DCHS2/exon.DCHS2/intron.DCHS2	0.00398194	hyper
chr3	13114341	13116110	shore:7809/island:4237/shore:7810	promoter.IQSEC1/1to5kb.IQSEC1/CDS.IQSEC1/5UTR.IQSEC1/exon.IQSEC1/intron.IQSEC1	0.00398818	hyper
chr6	168769811	168771000	shore:16089	intergenic.NA	0.00400032	hyper
chr2	129075361	129076440	island:3379	promoter.HS6ST1/CDS.HS6ST1/5UTR.HS6ST1/exon.HS6ST1/intron.HS6ST1	0.00400678	hyper
chr17	35295831	35298480	island:20689	1to5kb.NA/CDS.LHX1/5UTR.LHX1/exon.LHX1/intron.LHX1/3UTR.LHX1	0.00401602	hyper
chr8	142527871	142529340	shore:20560/island:11217/shore:20561	intergenic.NA	0.00401602	hyper
chr22	44726411	44728250	shore:47842/island:26434/shore:47843	intergenic.NA	0.00401602	hyper
chr3	187387311	187388490	shore:9649/island:5210/shore:9650	promoter.SST/CDS.SST/5UTR.SST/exon.SST/intron.SST	0.00402181	hyper
chr5	115265631	115266280	inter:5337	intergenic.NA	0.00405585	hypo
chr5	175223301	175224880	shore:13587/island:7397/shore:13588	promoter.CPLX2/5UTR.CPLX2/exon.CPLX2/intron.CPLX2	0.0040639	hyper
chr4	176922181	176923910	shore:11531/island:6258/shore:11532/island:6259/shore:11533	promoter.GPM6A/CDS.GPM6A/5UTR.GPM6A/exon.GPM6A/intron.GPM6A	0.00406686	hyper
chr12	64061591	64063400	shore:28812/island:15750/shore:28813	promoter.DPY19L2/1to5kb.DPY19L2/CDS.DPY19L2/5UTR.DPY19L2/exon.DPY19L2/intron.DPY19L2	0.00406686	hyper
chr10	102418851	102419940	shore:24476/island:13361/shore:24477	intergenic.NA	0.00407004	hyper
chr2	74741041	74744230	island:3012/shore:5558	promoter.TLX2/CDS.TLX2/5UTR.TLX2/exon.TLX2/intron.TLX2/3UTR.TLX2	0.00407207	hyper
chr17	72666901	72668030	shore:38822/island:21283/shore:38823	promoter.RAB37/CDS.RAB37/5UTR.RAB37/exon.RAB37/intron.RAB37	0.00413753	hyper
chr12	62584471	62586490	shore:28796/island:15742/shore:28797	5UTR.FAM19A2/exon.FAM19A2/intron.FAM19A2	0.00416473	hyper
chr5	135529011	135529670	shore:12960	promoter.SMIM32	0.00416537	hyper
chr16	28549101	28549670	inter:14290	CDS.NUPR1/exon.NUPR1/intron.NA/intron.NUPR1/3UTR.NUPR1	0.00417007	hyper
chr1	23495511	23495910	inter:383	promoter.LUZP1/5UTR.LUZP1/exon.LUZP1/intron.LUZP1	0.00420227	hypo
chr15	89903181	89903990	shore:33786/island:18448/shore:33787	intergenic.NA	0.00423634	hyper
chr9	139435921	139437160	shelf:19844/shore:22935	1to5kb.NA/intron.NOTCH1	0.00430452	hyper
chr18	31020181	31021260	shore:39902/island:21882/shore:39903	promoter.CCDC178/1to5kb.CCDC178/5UTR.CCDC178/exon.CCDC178/intron.CCDC178	0.00431917	hyper
chr8	93113781	93116100	shore:20178/island:11012/shore:20179	promoter.RUNX1T1/1to5kb.RUNX1T1/CDS.RUNX1T1/5UTR.RUNX1T1/exon.RUNX1T1/intron.RUNX1T1	0.0043359	hyper
chr12	106973921	106976900	shore:29144/island:15920/shore:29145/island:15921/shore:29146	promoter.RFX4/1to5kb.RFX4/5UTR.RFX4/exon.RFX4/intron.LOC100287944	0.0043725	hyper
chr16	24266721	24268090	shore:35049/island:19199/shore:35050	promoter.CACNG3/CDS.CACNG3/5UTR.CACNG3/exon.CACNG3	0.00445961	hyper
chr9	36739221	36740290	shore:21317/island:11649/shore:21318	intergenic.NA	0.00446448	hyper
chr1	149136651	149138700	shore:2962/island:1617/shore:2963	intergenic.NA	0.00446448	hyper
chr14	91821291	91822070	inter:13124	intron.CCDC88C	0.00448525	hyper
chr10	94825271	94826610	shore:24319/island:13274/shore:24320	CDS.CYP26C1/exon.CYP26C1/intron.CYP26C1	0.00459314	hyper
chr16	2120041	2142230	inter:14043/shelf:29611/shore:34431/island:18848/shore:34432/island:18849/shore:34433/island:18850/shore:34434/shelf:29612/shore:34435/island:18851/shore:34436/shelf:29613/shore:34437/island:18852/shore:34438	promoter.TSC2/promoter.MIR1225/1to5kb.TSC2/1to5kb.MIR1225/CDS.TSC2/CDS.PKD1/5UTR.TSC2/exon.TSC2/exon.PKD1/exon.MIR1225/intron.TSC2/intron.NA/intron.PKD1/3UTR.TSC2/3UTR.PKD1	0.00459605	hyper
chr20	2785071	2786820	shelf:37814/inter:17774	1to5kb.CPXM1/intergenic.NA	0.00462256	hyper
chr11	20229161	20230790	inter:10599	intergenic.NA	0.00462972	hyper
chr9	36985701	36987440	shore:21321/island:11651/shore:21322	intron.PAX5	0.00464477	hyper
chr4	3642271	3642640	shore:10197	intergenic.NA	0.00468398	hypo
chr13	28365301	28370110	shore:30201/island:16507/shore:30202/island:16508/shore:30203	promoter.GSX1/1to5kb.GSX1/CDS.GSX1/5UTR.GSX1/exon.GSX1/intron.GSX1/3UTR.GSX1/intergenic.NA	0.00468398	hyper
chr5	76931911	76933780	shore:12497/island:6796/shore:12498	CDS.OTP/exon.OTP/intron.OTP	0.00468398	hyper
chr4	13528991	13530100	shore:10425/island:5660/shore:10426	exon.LINC01097/intron.LINC01097	0.00469377	hyper
chr5	10561671	10563780	shore:12031/island:6547	promoter.ANKRD33B/1to5kb.ANKRD33B	0.00471397	hyper
chr20	44802771	44803960	shore:45571/island:25195/shore:45572	CDS.CDH22/exon.CDH22/intron.CDH22/3UTR.CDH22	0.00474166	hyper
chr19	34971011	34975230	shore:42870/island:23653/shore:42871	promoter.WTIP/1to5kb.WTIP/CDS.WTIP/exon.WTIP/intron.WTIP	0.00474166	hyper
chr12	106978381	106981740	shore:29147/island:15923/shore:29148	intron.RFX4/intron.LOC100287944	0.00474166	hyper
chr4	81186641	81188700	shore:10891/island:5908/shore:10892	promoter.FGF5/1to5kb.FGF5/CDS.FGF5/5UTR.FGF5/exon.FGF5/intron.FGF5	0.00474743	hyper
chr16	1921041	1923590	shore:34388/island:18821/shore:34389	promoter.MEIOB/1to5kb.MEIOB/5UTR.MEIOB/exon.MEIOB/intron.MEIOB/intron.NA	0.00476285	hyper
chr19	22816351	22817800	shore:42702/island:23562/shore:42703	promoter.ZNF492/5UTR.ZNF492/exon.ZNF492/intron.ZNF492	0.00478868	hyper
chr12	25054561	25056760	shore:28111/island:15367/shore:28112	promoter.BCAT1/1to5kb.BCAT1/CDS.BCAT1/5UTR.BCAT1/exon.BCAT1/intron.BCAT1	0.00482719	hyper
chr6	12749051	12750780	shore:14114/island:7695/shore:14115	CDS.PHACTR1/exon.PHACTR1/intron.PHACTR1	0.00485736	hyper
chr15	32725151	32727570	shore:32772/island:17917/shore:32773	promoter.ULK4P3/promoter.ULK4P1/1to5kb.NA/exon.ULK4P3/exon.ULK4P1/intron.ULK4P3/intron.ULK4P1	0.00485816	hyper
chr17	79614541	79616200	shore:39318/island:21553/shore:39319	CDS.TSPAN10/exon.TSPAN10/intron.TSPAN10/3UTR.TSPAN10/intergenic.NA	0.00486794	hyper
chr5	63985931	63987240	shore:12335/island:6711/shore:12336	promoter.SHISAL2B/CDS.SHISAL2B/5UTR.SHISAL2B/exon.SHISAL2B/intron.SHISAL2B	0.00489253	hyper
chr4	7376151	7376430	inter:4308	intron.SORCS2	0.00489673	hypo
chr10	111216241	111217390	shore:24680/island:13481/shore:24681	intergenic.NA	0.00490134	hyper
chr5	33891881	33892700	shore:12125/island:6596/shore:12126	promoter.ADAMTS12/1to5kb.NA/CDS.ADAMTS12/5UTR.ADAMTS12/exon.ADAMTS12	0.00490134	hyper
chr6	117085481	117087250	shore:15524/island:8460/shore:15525	promoter.FAM162B/CDS.FAM162B/5UTR.FAM162B/exon.FAM162B/intron.FAM162B	0.00490434	hyper
chr17	40464091	40465310	shore:37971/island:20810/shore:37972	intergenic.NA	0.00493171	hyper
chr17	70111671	70114850	shore:38773/island:21255/shore:38774/island:21256/shore:38775	promoter.NA/1to5kb.SOX9/1to5kb.NA/exon.NA/intron.NA	0.00495547	hyper
chr10	102986761	102990170	island:13403/shore:24541	promoter.LBX1-AS1/promoter.LBX1/1to5kb.LBX1-AS1/1to5kb.LBX1/CDS.LBX1-AS1/CDS.LBX1/5UTR.LBX1-AS1/5UTR.LBX1/exon.LBX1-AS1/exon.LBX1/intron.LBX1-AS1/intron.LBX1/3UTR.LBX1	0.00495547	hyper
chr13	95619581	95621300	shore:30620/island:16739/shore:30621	intergenic.NA	0.00495547	hyper
chr10	119304171	119305660	island:13535/shore:24783	promoter.EMX2OS/1to5kb.EMX2OS/CDS.EMX2/exon.EMX2/exon.EMX2OS/intron.EMX2	0.00495547	hyper
chr17	59528381	59530560	shore:38622/island:21174/shore:38623	promoter.TBX4/1to5kb.TBX4/5UTR.TBX4/exon.TBX4/intron.TBX4	0.00498422	hyper
chr7	151386441	151386930	inter:7724	intron.PRKAG2	0.00499069	hypo
chr18	25755121	25758740	shore:39880/island:21871/shore:39881	promoter.CDH2/1to5kb.CDH2/CDS.CDH2/5UTR.CDH2/exon.CDH2/intron.CDH2	0.0050003	hyper
chr9	37037281	37038700	island:11656/shore:21329	1to5kb.PAX5	0.00507836	hyper
chr17	38178831	38179920	inter:15366	promoter.MED24/1to5kb.MED24/CDS.MED24/5UTR.MED24/exon.MED24/intron.MED24	0.00507836	hyper
chr15	92936101	92938700	shore:33888/island:18504/shore:33889	promoter.ST8SIA2/1to5kb.ST8SIA2/CDS.ST8SIA2/5UTR.ST8SIA2/exon.ST8SIA2/intron.ST8SIA2	0.00507836	hyper
chr2	85360841	85363050	island:3042/shore:5615	CDS.TCF7L1/exon.TCF7L1/intron.TCF7L1	0.00511446	hyper
chr22	50483091	50485210	shore:48103/island:26574/shore:48104	intergenic.NA	0.00515461	hypo
chr22	20483371	20485090	shore:47061/island:26027/shore:47062	intergenic.NA	0.00515461	hyper
chr5	3601741	3603570	island:6517/shore:11974	intergenic.NA	0.00515461	hyper
chr1	11579661	11580070	inter:220	CDS.DISP3/exon.DISP3/intron.DISP3	0.005248	hypo
chr17	43338721	43340090	shore:38173/island:20924/shore:38174	promoter.MAP3K14-AS1/promoter.SPATA32/CDS.SPATA32/5UTR.SPATA32/exon.MAP3K14-AS1/exon.SPATA32/intron.MAP3K14-AS1/intron.SPATA32	0.00528216	hyper
chr10	30347191	30348510	shore:23576/island:12890/shore:23577	promoter.JCAD/5UTR.JCAD/exon.JCAD/intron.JCAD	0.00529725	hyper
chr8	37822081	37824310	shore:19685/island:10750/shore:19686	promoter.ADRB3/CDS.ADRB3/5UTR.ADRB3/exon.ADRB3/intron.ADRB3	0.00530205	hyper
chr11	27741731	27742450	shore:25915/island:14183/shore:25916	promoter.BDNF/1to5kb.BDNF/5UTR.BDNF/exon.BDNF/intron.BDNF	0.00530357	hyper
chr4	55096031	55099620	shore:10699/island:5808	intron.PDGFRA	0.00530357	hyper
chr1	2978781	2981250	shore:380/island:234/shore:381	promoter.LINC00982/1to5kb.PRDM16/CDS.LINC00982/exon.LINC00982/intron.LINC00982/3UTR.LINC00982	0.00530357	hyper
chr4	147568491	147570160	inter:4752	intergenic.NA	0.00533172	hyper
chr10	133108831	133111340	shore:24998/island:13650/shore:24999	promoter.TCERG1L/1to5kb.TCERG1L/CDS.TCERG1L/5UTR.TCERG1L/exon.TCERG1L/intron.TCERG1L	0.00534788	hyper
chr9	128984641	128985840	shore:22317/island:12184/shore:22318/island:12185/shore:22319	intergenic.NA	0.00539709	hyper
chr14	93896411	93897800	shore:32060/island:17526/shore:32061	intron.UNC79	0.00542399	hyper
chr4	54969481	54970760	shore:10694/shelf:9354	intron.PDGFRA	0.00543508	hyper
chr3	147097931	147098930	inter:3916	intergenic.NA	0.00545955	hyper
chr12	130411011	130411510	inter:12210	intergenic.NA	0.00546864	hypo
chr5	76934041	76935560	shore:12498/island:6797/shore:12499	promoter.OTP/1to5kb.OTP/CDS.OTP/5UTR.OTP/exon.OTP/intron.OTP	0.00546864	hyper
chr8	142315291	142316390	shelf:17817/shore:20546	intergenic.NA	0.00552304	hyper
chr6	117584251	117585120	shore:15528/island:8462/shore:15529	1to5kb.VGLL2	0.00560975	hyper
chr11	115529651	115531600	shore:27382/island:14983/shore:27383	intergenic.NA	0.00572376	hyper
chr12	11652781	11654200	shore:28021/island:15320/shore:28022	intergenic.NA	0.00572376	hyper
chr13	31479941	31481380	shore:30269/island:16547/shore:30270	promoter.MEDAG/CDS.MEDAG/5UTR.MEDAG/exon.MEDAG/intron.MEDAG/intron.TEX26-AS1	0.00572825	hyper
chr1	242750151	242750530	inter:1823	intergenic.NA	0.00577308	hypo
chr3	2139601	2142050	shore:7648/island:4153/shore:7649	promoter.CNTN4/5UTR.CNTN4/exon.CNTN4/intron.CNTN4	0.00577812	hyper
chr4	6309771	6311580	inter:4291	intergenic.NA	0.00583002	hyper
chr14	36993221	36994770	shore:31362/island:17159/shore:31363	1to5kb.SFTA3/1to5kb.NKX2-1/intergenic.NA	0.00584762	hyper
chr20	61703001	61704240	shore:45999/island:25429/shore:46000	intron.LINC01749	0.0058757	hyper
chr19	56988001	56990780	shore:44578/island:24654/shore:44579	promoter.ZNF667-AS1/promoter.ZNF667/1to5kb.ZNF667-AS1/1to5kb.ZNF667/5UTR.ZNF667/exon.ZNF667-AS1/exon.ZNF667/intron.ZNF667-AS1/intron.ZNF667	0.0058812	hyper
chr13	112547151	112548980	shore:30806/island:16839/shore:30807	intergenic.NA	0.00589039	hyper
chr19	20842631	20844670	inter:16989	promoter.ZNF626/CDS.ZNF626/5UTR.ZNF626/exon.ZNF626/intron.ZNF626	0.00591414	hyper
chr15	100912941	100914340	shore:33995/island:18562/shore:33996	intergenic.NA	0.00602013	hyper
chr6	27524491	27526590	inter:5954	1to5kb.NA	0.00602013	hyper
chr7	50467161	50469310	shore:17319/island:9465/shore:17320	CDS.IKZF1/exon.IKZF1/intron.IKZF1/3UTR.IKZF1	0.00604716	hyper
chr20	48183761	48185000	shore:45637/island:25229/shore:45638	promoter.PTGIS/CDS.PTGIS/5UTR.PTGIS/exon.PTGIS/intron.PTGIS	0.00608851	hyper
chr12	99139071	99140080	shore:29043/island:15868/shore:29044	CDS.ANKS1B/exon.ANKS1B/intron.ANKS1B/3UTR.ANKS1B	0.00608851	hyper
chr14	100125371	100127040	shore:32133/island:17565/shore:32134	CDS.HHIPL1/exon.HHIPL1/intron.HHIPL1	0.0061141	hyper
chr12	58021101	58022970	shore:28763/island:15723/shore:28764	CDS.B4GALNT1/exon.B4GALNT1/intron.B4GALNT1/3UTR.B4GALNT1	0.00613969	hyper
chr6	114662411	114663250	shore:15508	intron.HS3ST5	0.00616535	hyper
chr19	37281471	37283100	shore:43053/island:23762/shore:43054	intergenic.NA	0.00620864	hyper
chr1	39233391	39233670	inter:613	intergenic.NA	0.00622118	hypo
chr13	96295711	96297580	shore:30631/island:16745/shore:30632	promoter.DZIP1/5UTR.DZIP1/exon.DZIP1/intron.DZIP1	0.00623029	hyper
chr16	49310941	49312870	shore:35519/island:19449/shore:35520	exon.CBLN1/3UTR.CBLN1/intergenic.NA	0.00627357	hyper
chr9	69199801	69202280	shore:21543/island:11767/shore:21544	promoter.FOXD4L6/CDS.FOXD4L6/5UTR.FOXD4L6/exon.FOXD4L6/3UTR.FOXD4L6	0.00627357	hyper
chr5	175559561	175560860	inter:5662	intergenic.NA	0.00630508	hyper
chr13	47684841	47685410	inter:12480	intergenic.NA	0.00630852	hypo
chr3	42726751	42728400	shore:8090/island:4387/shore:8091	promoter.KLHL40/CDS.KLHL40/5UTR.KLHL40/exon.KLHL40/intron.KLHL40	0.00633267	hyper
chr19	11590101	11592310	shore:41937/island:23127	promoter.ELAVL3/CDS.ELAVL3/5UTR.ELAVL3/exon.ELAVL3/intron.ELAVL3	0.00635371	hyper
chr1	67217511	67218770	shore:2222/island:1215/shore:2223	promoter.TCTEX1D1/5UTR.TCTEX1D1/exon.TCTEX1D1/intron.TCTEX1D1	0.00639442	hyper
chr2	31456541	31457950	shore:5043/island:2732/shore:5044	promoter.EHD3/promoter.CAPN14/1to5kb.CAPN14/CDS.EHD3/5UTR.EHD3/5UTR.CAPN14/exon.EHD3/exon.CAPN14/intron.EHD3/intron.CAPN14	0.0064318	hyper
chr6	36808041	36809100	island:8053/shore:14773	promoter.CPNE5/1to5kb.CPNE5/exon.NA/intron.NA	0.00644087	hyper
chr3	181440991	181442620	shelf:8399/shore:9523	intron.SOX2-OT	0.00651226	hyper
chr20	21694111	21695730	shore:45102/island:24940/shore:45103	CDS.PAX1/exon.PAX1/intron.PAX1/3UTR.PAX1	0.00666991	hyper
chr1	147781151	147782800	shore:2921/island:1592/shore:2922	promoter.NA/1to5kb.NA/intron.NBPF8	0.00667582	hyper
chr2	163694631	163696420	inter:2739	promoter.KCNH7/1to5kb.KCNH7/CDS.KCNH7/5UTR.KCNH7/exon.KCNH7/intron.KCNH7	0.00667582	hyper
chr7	90894611	90897190	island:9755/shore:17861	CDS.FZD1/exon.FZD1/3UTR.FZD1	0.00667582	hyper
chr6	132721781	132723480	shore:15626/island:8513/shore:15627	promoter.MOXD1/CDS.MOXD1/5UTR.MOXD1/exon.MOXD1/intron.MOXD1	0.00667582	hyper
chr2	157340551	157341200	inter:2720	intron.GPD2	0.00667815	hyper
chr9	115651971	115653740	shore:22102/island:12064/shore:22103	promoter.SLC46A2/CDS.SLC46A2/5UTR.SLC46A2/exon.SLC46A2	0.00672062	hyper
chr19	3879861	3881480	shore:41250/island:22722/shore:41251	promoter.ATCAY/5UTR.ATCAY/exon.ATCAY/intron.ATCAY	0.00674199	hyper
chr7	102920461	102921780	island:9924/shore:18178	promoter.DPY19L2P2/1to5kb.DPY19L2P2/CDS.DPY19L2P2/5UTR.DPY19L2P2/exon.DPY19L2P2/intron.DPY19L2P2	0.00683781	hyper
chr6	27646611	27649770	shore:14338/island:7817/shore:14339	promoter.NA/1to5kb.NA/exon.NA	0.00684711	hyper
chr7	150037241	150039640	shore:18647/island:10170/shore:18648	promoter.RARRES2/CDS.RARRES2/5UTR.RARRES2/exon.RARRES2/intron.RARRES2	0.00693269	hyper
chr20	37433471	37436060	shore:45426/island:25116/shore:45427	promoter.PPP1R16B/5UTR.PPP1R16B/exon.PPP1R16B/intron.PPP1R16B	0.00698878	hyper
chr16	55362431	55363490	shore:35600/island:19495/shore:35601	CDS.IRX6/exon.IRX6/intron.IRX6	0.00700867	hyper
chr15	30683791	30686280	shore:32731/island:17895/shore:32732	promoter.CHRFAM7A/1to5kb.NA/5UTR.CHRFAM7A/exon.CHRFAM7A/intron.CHRFAM7A	0.00701321	hyper
chr11	88798671	88799520	inter:11119	promoter.GRM5/1to5kb.GRM5/5UTR.GRM5/exon.GRM5/intron.GRM5	0.00701977	hyper
chr20	55972301	55980610	inter:18144/shelf:38586	intron.NA/intron.RBM38	0.00704485	hyper
chr6	101849491	101851180	shore:15375/island:8380/shore:15376	intron.GRIK2	0.00704485	hyper
chr6	166217721	166219300	shore:15977/island:8696/shore:15978	intron.NA	0.00704485	hyper
chr14	36982121	36984240	shore:31358/island:17155/shore:31359	promoter.SFTA3/1to5kb.NA/1to5kb.SFTA3/CDS.SFTA3/5UTR.SFTA3/exon.SFTA3/intron.SFTA3	0.00704928	hyper
chr12	115134051	115135620	shore:29341	intergenic.NA	0.0070751	hyper
chr2	164592041	164593790	shore:6543/island:3538/shore:6544	promoter.FIGN/1to5kb.FIGN/5UTR.FIGN/exon.FIGN/intron.FIGN	0.00715687	hyper
chr12	25101321	25102420	shore:28113/island:15368/shore:28114	promoter.BCAT1/CDS.BCAT1/5UTR.BCAT1/exon.BCAT1/intron.BCAT1	0.00715687	hyper
chr8	23559351	23561400	shore:19541/island:10673/shore:19542	CDS.NKX2-6/exon.NKX2-6/intron.NKX2-6/intergenic.NA	0.00717213	hyper
chr22	19509971	19512670	shore:46992/island:25987/shore:46993	CDS.CLDN5/5UTR.CLDN5/exon.CLDN5/intron.CLDN5/3UTR.CLDN5/intergenic.NA	0.00720742	hyper
chr15	30864391	30866890	shore:32735/island:17897/shore:32736	promoter.ULK4P1/1to5kb.NA/exon.ULK4P1/intron.ULK4P1	0.00722339	hyper
chr18	44335711	44338960	shore:39995/island:21929/shore:39996/island:21930/shore:39997	promoter.ST8SIA5/1to5kb.ST8SIA5/CDS.ST8SIA5/5UTR.ST8SIA5/exon.ST8SIA5/intron.ST8SIA5	0.0072376	hyper
chr1	145963041	145964840	shore:2851/island:1549/shore:2852	promoter.NA/exon.NA/intron.NBPF20/intron.NBPF10	0.00724714	hyper
chr13	24120141	24121830	shore:30120/island:16466/shore:30121	intergenic.NA	0.00728608	hyper
chr1	92945521	92947840	shore:2431/island:1329	CDS.GFI1/exon.GFI1/intron.GFI1	0.00729791	hyper
chr1	108506811	108509320	shore:2522/island:1376/shore:2523	promoter.VAV3-AS1/promoter.VAV3/1to5kb.VAV3/CDS.VAV3/5UTR.VAV3/exon.VAV3-AS1/exon.VAV3/intron.VAV3-AS1/intron.VAV3	0.00731855	hyper
chr1	76081251	76082630	shore:2278/island:1246/shore:2279	promoter.SLC44A5/1to5kb.SLC44A5/CDS.SLC44A5/5UTR.SLC44A5/exon.SLC44A5/intron.SLC44A5	0.00734699	hyper
chr6	10398171	10399140	shore:14079/island:7673/shore:14080	CDS.TFAP2A/exon.TFAP2A/intron.TFAP2A/3UTR.TFAP2A	0.00736712	hyper
chr5	1881541	1885010	shore:11934/island:6495	promoter.IRX4/1to5kb.IRX4/CDS.IRX4/5UTR.IRX4/exon.IRX4/intron.IRX4	0.00742381	hyper
chr19	2250371	2254750	shore:40975/island:22549/shore:40976	promoter.MIR4321/CDS.AMH/CDS.JSRP1/exon.AMH/exon.MIR4321/exon.JSRP1/intron.AMH/intron.JSRP1/3UTR.AMH/3UTR.JSRP1/intergenic.NA	0.00745628	hyper
chr2	114256151	114258530	shore:6061/island:3277/shore:6062	promoter.FOXD4L1/CDS.FOXD4L1/5UTR.FOXD4L1/exon.FOXD4L1/3UTR.FOXD4L1	0.00747498	hyper
chr12	49689621	49690400	island:15505	CDS.PRPH/exon.PRPH/intron.PRPH	0.00749754	hyper
chr1	78956371	78957790	shore:2305/island:1260/shore:2306	promoter.PTGFR/5UTR.PTGFR/exon.PTGFR/intron.PTGFR	0.00749754	hyper
chr2	220173011	220174580	shore:7108/island:3853/shore:7109/island:3854/shore:7110	promoter.PTPRN/CDS.PTPRN/5UTR.PTPRN/exon.PTPRN/intron.PTPRN	0.00751381	hyper
chr16	28876951	28879080	shore:35118/shelf:30167	CDS.SH2B1/5UTR.SH2B1/exon.SH2B1/intron.SH2B1/intron.NA	0.00751696	hyper
chr1	44029801	44032180	shore:1827/island:1007/shore:1828	intron.PTPRF	0.00759677	hyper
chr21	32929641	32932730	shore:46329/island:25624/shore:46330	promoter.NA/promoter.TIAM1/1to5kb.NA/1to5kb.TIAM1/CDS.NA/5UTR.NA/5UTR.TIAM1/exon.NA/exon.TIAM1/intron.NA/intron.TIAM1/3UTR.NA	0.00760248	hyper
chr1	170633791	170637120	island:1922/shore:3532/shelf:3028	intron.PRRX1	0.00764716	hyper
chr10	119295601	119296970	island:13534	1to5kb.EMX2/intron.EMX2OS	0.00767841	hyper
chr10	43599131	43600980	shore:23682/island:12944	promoter.RET/1to5kb.RET/CDS.RET/5UTR.RET/exon.RET/intron.RET	0.00773281	hyper
chr19	15341881	15345110	shore:42253/island:23309/shore:42254/island:23310/shore:42255	promoter.EPHX3/1to5kb.EPHX3/CDS.EPHX3/5UTR.EPHX3/exon.EPHX3/intron.EPHX3	0.00775946	hyper
chr4	77910851	77911440	inter:4544	intron.SEPT11	0.00785075	hyper
chr19	35395661	35396790	shore:42886/island:23661/shore:42887	promoter.NA/exon.NA	0.00793489	hyper
chr5	170734581	170740080	shore:13492/island:7342/shore:13493	promoter.TLX3/promoter.NA/1to5kb.TLX3/1to5kb.NA/CDS.TLX3/CDS.NA/5UTR.TLX3/5UTR.NA/exon.TLX3/exon.NA/intron.TLX3/3UTR.TLX3/3UTR.NA	0.00797161	hyper
chr7	44364171	44365300	shore:17251/island:9429	promoter.CAMK2B/CDS.CAMK2B/5UTR.CAMK2B/exon.CAMK2B/intron.CAMK2B	0.00798722	hyper
chr3	184208901	184211110	shore:9591/island:5179/shore:9592	intergenic.NA	0.00798722	hyper
chr3	27769821	27772180	shore:7940/island:4308/shore:7941	intergenic.NA	0.00808358	hyper
chr15	27016551	27019260	shore:32647/island:17847/shore:32648	promoter.GABRB3/1to5kb.GABRB3/CDS.GABRB3/5UTR.GABRB3/exon.GABRB3/intron.GABRB3	0.00823847	hyper
chr11	104034271	104035360	shore:27279/island:14931/shore:27280	promoter.PDGFD/CDS.PDGFD/5UTR.PDGFD/exon.PDGFD/intron.PDGFD	0.00827772	hyper
chr17	7905861	7907700	shore:37085/island:20329/shore:37086	promoter.GUCY2D/CDS.GUCY2D/5UTR.GUCY2D/exon.GUCY2D/intron.GUCY2D	0.00831635	hyper
chr10	92616491	92617790	shore:24279/island:13251	promoter.HTR7/CDS.HTR7/5UTR.HTR7/exon.HTR7/intron.HTR7	0.00831635	hyper
chr22	49816791	49817200	inter:19033	intron.NA	0.0083546	hypo
chr13	42001161	42003080	inter:12453	intergenic.NA	0.00837582	hyper
chr2	162282561	162285270	shore:6535/island:3534/shore:6536	intergenic.NA	0.00838153	hyper
chr5	82767071	82768080	shore:12559	promoter.VCAN/5UTR.VCAN/exon.VCAN/intron.VCAN	0.00853575	hyper
chr15	98835861	98836610	inter:13939	intergenic.NA	0.00856321	hyper
chr1	3118141	3118660	inter:97	intron.PRDM16	0.00860721	hypo
chr19	30865371	30866980	shore:42776/island:23603/shore:42777	intron.ZNF536	0.00862081	hyper
chr5	115296861	115299780	shore:12738/island:6924/shore:12739/island:6925/shore:12740	promoter.LVRN/promoter.NA/1to5kb.LVRN/CDS.LVRN/CDS.NA/5UTR.LVRN/5UTR.NA/exon.LVRN/exon.NA/intron.LVRN/3UTR.NA	0.00862686	hyper
chr9	133540871	133542610	island:12317/shore:22571	CDS.PRDM12/exon.PRDM12/intron.PRDM12	0.00863023	hyper
chr16	86537981	86538630	shore:36221	intron.FENDRR	0.00867689	hyper
chr5	134870201	134872240	shore:12940/island:7034/shore:12941	promoter.NEUROG1/CDS.NEUROG1/5UTR.NEUROG1/exon.NEUROG1/3UTR.NEUROG1	0.00867689	hyper
chr20	30073181	30073890	shore:45173	promoter.LINC00028/exon.LINC00028/intron.LINC00028	0.00874681	hyper
chr5	158531071	158532810	shore:13425/island:7307/shore:13426/island:7308/shore:13427	1to5kb.EBF1/intron.NA	0.00874681	hyper
chr2	91634041	91636710	shore:5708/island:3090/shore:5709	intergenic.NA	0.00875249	hyper
chr6	161099781	161100850	shore:15945/island:8680/shore:15946	intergenic.NA	0.0087556	hyper
chr8	12236281	12236680	inter:7962	intron.LOC100506990/intron.FAM66A	0.00884671	hypo
chr8	493891	496790	shore:19065/island:10412/shore:19066	promoter.TDRP/promoter.NA/1to5kb.TDRP/1to5kb.NA/CDS.TDRP/5UTR.TDRP/exon.TDRP/exon.NA/intron.TDRP	0.00884733	hyper
chr6	163834061	163837460	inter:6646	promoter.QKI/promoter.CAHM/1to5kb.QKI/1to5kb.CAHM/CDS.QKI/5UTR.QKI/exon.QKI/exon.CAHM/intron.QKI	0.00888048	hyper
chr20	21371541	21373010	shore:45091/island:24933/shore:45092	intergenic.NA	0.00889174	hyper
chr21	31311081	31312690	shore:46323/island:25621/shore:46324	promoter.GRIK1/CDS.GRIK1/5UTR.GRIK1/exon.GRIK1/intron.GRIK1	0.00892398	hyper
chr1	75595581	75598820	shore:2272/island:1241/shore:2273/island:1242/shore:2274	promoter.LHX8/promoter.NA/1to5kb.LHX8/CDS.LHX8/5UTR.LHX8/exon.LHX8/exon.NA/intron.LHX8/intron.NA	0.00894395	hyper
chr1	10842441	10843140	inter:211	intron.CASZ1	0.00901002	hyper
chr7	112725651	112726990	inter:7523	promoter.GPR85/promoter.NA/1to5kb.NA/5UTR.GPR85/exon.GPR85/intron.GPR85	0.00902512	hyper
chr13	107569141	107570300	shore:30715/island:16790	intergenic.NA	0.00911793	hyper
chr4	3768071	3770080	island:5539/shore:10208	promoter.ADRA2C/CDS.ADRA2C/5UTR.ADRA2C/exon.ADRA2C/3UTR.ADRA2C	0.0091431	hyper
chr16	4055401	4056710	inter:14111	intron.ADCY9	0.00916547	hyper
chr16	56227351	56228870	shore:35616/shelf:30602	promoter.DKFZP434H168/1to5kb.LOC283856/CDS.DKFZP434H168/5UTR.DKFZP434H168/exon.DKFZP434H168/intron.GNAO1/3UTR.DKFZP434H168	0.00922819	hyper
chr9	129374511	129378410	island:12192/shore:22333	promoter.LMX1B/1to5kb.LMX1B/CDS.LMX1B/5UTR.LMX1B/exon.LMX1B/intron.LMX1B	0.00924271	hyper
chr19	49635911	49638600	shore:43996/island:24310/shore:43997	CDS.PPFIA3/exon.PPFIA3/intron.PPFIA3	0.00929099	hyper
chr13	95353621	95356500	shore:30615/island:16735/shore:30616	intergenic.NA	0.00938545	hyper
chr11	22453781	22454920	shore:25890/island:14170/shore:25891	intergenic.NA	0.00947935	hyper
chr1	75138911	75139730	inter:882	promoter.ERICH3/CDS.ERICH3/5UTR.ERICH3/exon.ERICH3/intron.ERICH3	0.00947935	hyper
chr5	180033241	180033770	inter:5763	intron.FLT4	0.00951261	hypo
chr15	89949131	89951750	shore:33796/island:18454/shore:33797	intergenic.NA	0.00951831	hyper
chr3	197597181	197597880	inter:4155	intron.LRCH3	0.00953483	hyper
chr19	44952081	44953090	shore:43562/island:24059/shore:43563	promoter.ZNF229/5UTR.ZNF229/exon.ZNF229/intron.ZNF229	0.00964894	hyper
chr14	94253671	94255990	shore:32062/island:17527/shore:32063	promoter.PRIMA1/1to5kb.PRIMA1/CDS.PRIMA1/5UTR.PRIMA1/exon.PRIMA1/intron.PRIMA1	0.00964894	hyper
chr9	23820431	23823270	shore:21137/island:11553/shore:21138/island:11554/shore:21139	promoter.ELAVL2/1to5kb.ELAVL2/5UTR.ELAVL2/exon.ELAVL2/intron.ELAVL2	0.00971497	hyper
chr11	64479981	64481470	shore:26486/island:14501/shore:26487	CDS.NRXN2/5UTR.NRXN2/exon.NRXN2/intron.NRXN2	0.00975556	hyper
chr16	2040651	2043550	shore:34409/island:18835/shore:34410	CDS.SYNGR3/exon.SYNGR3/intron.SYNGR3/intron.NA/3UTR.SYNGR3	0.00981151	hyper
chr8	99962331	99962970	shore:20256	CDS.OSR2/exon.OSR2/intron.OSR2	0.00981151	hyper
chr6	10886501	10887930	shore:14104/island:7690/shore:14105	promoter.SYCP2L/1to5kb.GCM2/CDS.SYCP2L/5UTR.SYCP2L/exon.SYCP2L/intron.SYCP2L	0.00993554	hyper
chr7	155164031	155168130	shore:18796/island:10257/shore:18797	intergenic.NA	0.00993554	hyper
chr19	45888481	45889750	shore:43635/island:24101/shore:43636	CDS.PPP1R13L/exon.PPP1R13L/intron.PPP1R13L	0.00997109	hyper
chr11	102986161	102986660	inter:11169	intron.DYNC2H1	0.0100163	hypo
chr1	197890171	197891070	shore:3716/island:2018/shore:3717	CDS.LHX9/exon.LHX9/intron.LHX9	0.0100412	hyper
chr13	78492101	78494150	shore:30573/island:16711/shore:30574	promoter.RNF219-AS1/promoter.EDNRB/1to5kb.RNF219-AS1/1to5kb.EDNRB/CDS.EDNRB/5UTR.EDNRB/exon.RNF219-AS1/exon.EDNRB/intron.RNF219-AS1/intron.EDNRB	0.010093	hyper
chr5	134373601	134375230	shore:12925/island:7025	1to5kb.PITX1/intron.C5orf66	0.0101562	hyper
chr7	149388841	149390330	shore:18622/island:10157/shore:18623	promoter.NA/1to5kb.NA	0.0102347	hyper
chr3	159756361	159757270	shore:9398/island:5079/shore:9399	intron.NA	0.010352	hyper
chr10	50976041	50978090	shore:23857/island:13034/shore:23858	intergenic.NA	0.0103523	hyper
chr5	180527131	180529620	shore:13872/island:7552/shore:13873	promoter.NA/1to5kb.NA/exon.NA	0.0104859	hyper
chr14	57270731	57271460	shelf:27183	CDS.OTX2/exon.OTX2/intron.OTX2	0.0106273	hyper
chr3	147136441	147137660	shore:9291/island:5023/shore:9292	intergenic.NA	0.0106649	hyper
chr13	50700621	50704310	island:16648/shore:30459/island:16649	promoter.DLEU2/1to5kb.DLEU2/intron.DLEU1	0.0106877	hyper
chr17	5402861	5404720	shore:36944/island:20249/shore:36945	promoter.LOC728392/CDS.LOC728392/5UTR.LOC728392/exon.LOC728392/exon.NLRP1/intron.LOC728392/3UTR.LOC728392/3UTR.NLRP1	0.0106877	hyper
chr3	124860091	124861860	shore:8918/island:4825/shore:8919	intron.SLC12A8	0.0106877	hyper
chr12	119418271	119420190	shore:29393/island:16060/shore:29394/island:16061/shore:29395	promoter.SRRM4/1to5kb.SRRM4/CDS.SRRM4/5UTR.SRRM4/exon.SRRM4/intron.SRRM4	0.0107365	hyper
chr2	42280971	42281690	inter:2123	CDS.PKDCC/exon.PKDCC/intron.PKDCC	0.0107545	hyper
chr1	148853341	148856200	shore:2955/island:1613/shore:2956	intergenic.NA	0.0107821	hyper
chr14	61108041	61110220	shore:31607/island:17291/shore:31608	intergenic.NA	0.0108361	hyper
chr5	2738561	2741560	shore:11956/island:6507/shore:11957	intergenic.NA	0.0108361	hyper
chr7	20823061	20824910	shore:16912/island:9239	CDS.SP8/CDS.NA/exon.SP8/exon.NA/3UTR.SP8	0.0108648	hyper
chr19	2289871	2292200	shore:40983/island:22555/shore:40984	promoter.NA/CDS.NA/CDS.LINGO3/5UTR.NA/5UTR.LINGO3/exon.NA/exon.LINGO3/intron.SPPL2B/intron.LINGO3/3UTR.NA/3UTR.LINGO3	0.0108724	hyper
chr6	1392781	1394630	shore:13934/island:7590/shore:13935	intron.FOXF2	0.0109042	hyper
chr13	112725771	112728730	shore:30824/island:16851/shore:30825	exon.SOX1/3UTR.SOX1/intergenic.NA	0.0109194	hyper
chr5	167955381	167957720	shore:13472/island:7332/shore:13473	promoter.FBLL1/1to5kb.FBLL1/CDS.FBLL1/5UTR.FBLL1/exon.FBLL1/3UTR.FBLL1/intergenic.NA	0.0109218	hyper
chr1	236849171	236850630	shore:4393/island:2382/shore:4394	promoter.ACTN2/CDS.ACTN2/5UTR.ACTN2/exon.ACTN2/intron.ACTN2	0.0109369	hyper
chr6	100894741	100897870	shore:15357/island:8366/shore:15358/island:8367/shore:15359/island:8368/shore:15360	CDS.SIM1/exon.SIM1/intron.SIM1	0.0109369	hyper
chr20	44941061	44941900	shore:45584/island:25202/shore:45585	1to5kb.CDH22	0.0109548	hyper
chr12	124853611	124854960	shelf:25583/shore:29607	intron.NCOR2	0.0109646	hyper
chr9	34577571	34578590	shore:21228/island:11603/shore:21229	intron.CNTFR-AS1/intron.CNTFR	0.0109789	hyper
chr8	145729391	145732540	shore:20874/island:11409/shore:20875	promoter.GPT/1to5kb.MFSD3/CDS.GPT/5UTR.GPT/exon.GPT/intron.GPT/3UTR.GPT	0.011048	hyper
chr1	47694261	47695280	shelf:1628/shore:1958	1to5kb.TAL1/1to5kb.NA/5UTR.TAL1/exon.TAL1/exon.STIL/intron.TAL1/intron.STIL	0.0110496	hyper
chr9	98223811	98226180	inter:9014	promoter.LOC100507346/1to5kb.LOC100507346/CDS.PTCH1/exon.LOC100507346/exon.PTCH1/intron.LOC100507346/intron.PTCH1	0.0110496	hyper
chr15	96959091	96960990	shore:33943/island:18536/shore:33944	intergenic.NA	0.0112458	hyper
chr10	99530781	99532130	shore:24409/island:13321/shore:24410	promoter.SFRP5/CDS.SFRP5/5UTR.SFRP5/exon.SFRP5/intron.SFRP5	0.011261	hyper
chr2	39892001	39894250	shore:5114/island:2769/shore:5115	promoter.TMEM178A/1to5kb.TMEM178A/CDS.TMEM178A/5UTR.TMEM178A/exon.TMEM178A/intron.TMEM178A	0.0113052	hyper
chr11	22213901	22215580	shore:25886/island:14168/shore:25887	promoter.ANO5/CDS.ANO5/5UTR.ANO5/exon.ANO5/intron.ANO5	0.0113235	hyper
chr16	56696481	56697610	shore:35641/island:19518/shore:35642	intergenic.NA	0.0113449	hyper
chr7	155173931	155175550	shore:18798/island:10259/shore:18799	promoter.NA/exon.NA/intron.NA	0.0113845	hyper
chr2	106681131	106683190	shore:5937/island:3212/shore:5938	promoter.C2orf40/CDS.C2orf40/5UTR.C2orf40/exon.C2orf40/intron.C2orf40	0.0114085	hyper
chr8	65498251	65499360	shore:19959/island:10898/shore:19960	1to5kb.LOC401463	0.0114687	hyper
chr16	12994281	12997970	shore:34833/island:19080/shore:34834	promoter.SHISA9/1to5kb.SHISA9/CDS.SHISA9/5UTR.SHISA9/exon.SHISA9/intron.SHISA9	0.0115095	hyper
chr7	121939461	121941160	shore:18296/island:9985/shore:18297	1to5kb.FEZF1-AS1	0.011521	hyper
chr6	10395641	10396150	shelf:12255	intergenic.NA	0.0115478	hyper
chr7	121956221	121957530	shore:18302/island:9989/shore:18303	intergenic.NA	0.0115533	hyper
chr18	22928881	22931220	shore:39864/island:21863/shore:39865	CDS.ZNF521/5UTR.ZNF521/exon.ZNF521/intron.ZNF521	0.0116001	hyper
chr1	119534931	119536490	shore:2744/island:1492/shore:2745	1to5kb.TBX15	0.0116521	hyper
chr4	13548101	13549240	shore:10431/island:5664	1to5kb.NKX3-2/CDS.LINC01096/5UTR.LINC01096/exon.LINC01096/3UTR.LINC01096	0.0116692	hyper
chr17	79761001	79762870	shore:39335/island:21563/shore:39336	promoter.GCGR/1to5kb.GCGR/5UTR.GCGR/exon.GCGR/intron.GCGR	0.0117112	hyper
chr7	96618621	96619370	inter:7387	intron.DLX6-AS1	0.0117247	hyper
chr16	55364481	55366270	shore:35601/island:19496/shore:35602/island:19497/shore:35603	exon.IRX6/3UTR.IRX6/intergenic.NA	0.0117266	hyper
chr13	112187031	112187700	inter:12637	intergenic.NA	0.0119475	hyper
chr2	171677911	171680800	shore:6592/island:3566/shore:6593	CDS.GAD1/exon.GAD1/intron.GAD1	0.0119951	hyper
chr6	137808681	137811510	shore:15677/island:8541/shore:15678	intergenic.NA	0.0119951	hyper
chr16	80836991	80837720	inter:14695	intron.CDYL2	0.0119951	hyper
chr12	31078961	31080280	shore:28170/island:15398/shore:28171	promoter.TSPAN11/CDS.TSPAN11/5UTR.TSPAN11/exon.TSPAN11/intron.TSPAN11	0.0120687	hyper
chr7	44143281	44145060	inter:7087	promoter.AEBP1/CDS.AEBP1/5UTR.AEBP1/exon.AEBP1/intron.AEBP1	0.0121137	hyper
chr10	94179411	94181040	shore:24303/island:13263/shore:24304	promoter.NA/CDS.NA/5UTR.NA/exon.NA/intron.NA/3UTR.NA	0.012121	hyper
chr17	77788911	77790430	island:21437/shore:39119	intergenic.NA	0.012145	hyper
chr4	176986681	176987540	shore:11534/island:6260/shore:11535	promoter.WDR17/5UTR.WDR17/exon.WDR17/intron.WDR17	0.0122956	hyper
chr15	30514861	30518680	shore:32727/island:17893/shore:32728	intron.LINC02249	0.0122985	hyper
chr2	176935961	176937120	shore:6674/island:3614/shore:6675	intergenic.NA	0.0124179	hyper
chr6	27831571	27832690	shore:14352	promoter.HIST1H2AL/1to5kb.HIST1H2AL	0.012423	hyper
chr2	130763181	130764110	shore:6270/island:3393/shore:6271	intergenic.NA	0.0124541	hyper
chr11	8373131	8373700	inter:10515	intergenic.NA	0.0125436	hypo
chr9	135039381	135040090	shore:22636/island:12351/shore:22637	intron.NTNG2	0.0126432	hyper
chr5	180523771	180525460	shore:13871/island:7551/shore:13872	promoter.NA/1to5kb.NA/exon.NA	0.0126753	hyper
chr6	13859791	13861100	inter:5874	intergenic.NA	0.0127118	hyper
chr12	185171	188280	shore:27753/island:15180/shore:27754	promoter.IQSEC3/1to5kb.IQSEC3/5UTR.IQSEC3/exon.IQSEC3/intron.IQSEC3	0.0127118	hyper
chr16	54316571	54317430	shore:35588/island:19487/shore:35589	exon.IRX3/3UTR.IRX3/intergenic.NA	0.0127253	hyper
chr12	54440391	54441930	shore:28610/island:15638/shore:28611	intron.HOXC4	0.0127393	hyper
chr14	97499071	97500440	shore:32109/island:17552/shore:32110	intergenic.NA	0.0128951	hyper
chr4	81109581	81110780	shore:10882/island:5902/shore:10883	intron.PRDM8	0.0129092	hyper
chr17	15820311	15822240	shore:37222/island:20405/shore:37223	intergenic.NA	0.0129526	hyper
chr17	43862181	43863240	island:20934/shore:38194	intron.CRHR1	0.0129684	hyper
chr11	132812341	132814680	shore:27693/island:15148/shore:27694/island:15149/shore:27695	promoter.OPCML/1to5kb.OPCML/CDS.OPCML/5UTR.OPCML/exon.OPCML/intron.OPCML	0.0130861	hyper
chr1	240254791	240257670	shore:4405/island:2388/shore:4406	promoter.FMN2/CDS.FMN2/5UTR.FMN2/exon.FMN2/intron.FMN2	0.0131093	hyper
chr2	231733291	231733950	shelf:6320	intron.ITM2C	0.0131719	hyper
chr11	123228761	123229750	shore:27554/island:15073/shore:27555	intergenic.NA	0.0131974	hyper
chr15	89147361	89149670	shore:33762/island:18435/shore:33763	promoter.NA/1to5kb.MIR1179/1to5kb.NA/exon.NA/intron.NA	0.0131974	hyper
chr6	152956881	152958730	shore:15844/island:8629/shore:15845	promoter.SYNE1/5UTR.SYNE1/exon.SYNE1/intron.SYNE1	0.0132526	hyper
chr7	21582151	21583720	shore:16920/island:9243/shore:16921	promoter.DNAH11/CDS.DNAH11/5UTR.DNAH11/exon.DNAH11/intron.DNAH11	0.0132546	hyper
chr10	102976581	102978390	island:13401/shore:24538	intergenic.NA	0.0132702	hyper
chr5	7394651	7397280	shore:12010/island:6536/shore:12011	promoter.ADCY2/1to5kb.ADCY2/CDS.ADCY2/5UTR.ADCY2/exon.ADCY2/intron.ADCY2	0.0132888	hyper
chr1	207669101	207670350	shore:3913/island:2121/shore:3914	promoter.CR1/CDS.CR1/5UTR.CR1/exon.CR1/intron.CR1	0.0134261	hyper
chr6	29520881	29522010	shore:14417/island:7860/shore:14418	intergenic.NA	0.0134774	hyper
chr8	99963291	99964240	shore:20256/shelf:17549	CDS.OSR2/exon.OSR2/intron.OSR2/3UTR.OSR2	0.0134774	hyper
chr4	175132531	175133400	shelf:10098/shore:11523	intron.NA	0.0135052	hyper
chr21	47517421	47519460	shore:46812/island:25890/shore:46813	promoter.COL6A2/5UTR.COL6A2/exon.COL6A2/intron.COL6A2	0.0135627	hyper
chr10	102278831	102280050	shore:24467/island:13355/shore:24468	promoter.SEC31B/1to5kb.SEC31B/5UTR.SEC31B/exon.SEC31B/intron.SEC31B	0.0136355	hyper
chr1	4148671	4149200	inter:129	intergenic.NA	0.0136844	hypo
chr12	57629671	57630750	shore:28735/island:15705/shore:28736	CDS.NDUFA4L2/5UTR.NDUFA4L2/exon.NDUFA4L2/intron.NDUFA4L2	0.0138241	hyper
chr5	145713411	145714160	shore:13270/island:7224/shore:13271	1to5kb.POU4F3/intergenic.NA	0.0138241	hyper
chr16	49498701	49499660	shore:35525/island:19453/shore:35526	intergenic.NA	0.0138296	hyper
chr5	31210241	31210660	inter:5054	intron.CDH6	0.0138296	hypo
chr9	136392121	136393290	inter:9377	1to5kb.ADAMTSL2/1to5kb.MYMK	0.0138296	hyper
chr8	13423961	13424670	inter:7969	promoter.C8orf48/CDS.C8orf48/5UTR.C8orf48/exon.C8orf48	0.0138817	hyper
chr3	105072231	105073240	shore:8745/island:4737/shore:8746	intergenic.NA	0.0140595	hyper
chr2	242480681	242482100	island:4110/shore:7577	intergenic.NA	0.0140732	hyper
chr2	223165591	223167800	shore:7157/island:3884/shore:7158	promoter.NA/1to5kb.NA/1to5kb.PAX3/intron.CCDC140	0.0140856	hyper
chr11	122846951	122849150	shore:27543/island:15066/shore:27544	CDS.BSX/exon.BSX/intron.BSX/intergenic.NA	0.014098	hyper
chr3	39725551	39725820	inter:3366	intergenic.NA	0.0141221	hypo
chr1	143912491	143916440	shore:2794/island:1518/shore:2795	promoter.NA/promoter.FAM72D/1to5kb.NA/1to5kb.FAM72D/CDS.NA/5UTR.NA/5UTR.FAM72D/exon.NA/exon.FAM72D/intron.NA	0.0141452	hyper
chr8	40754891	40755640	shore:19719/island:10768/shore:19720	promoter.ZMAT4/5UTR.ZMAT4/exon.ZMAT4/intron.ZMAT4	0.0141945	hyper
chr11	132951421	132953940	shore:27698/island:15151/shore:27699/island:15152/shore:27700	intron.OPCML	0.0142146	hyper
chr4	3651271	3651580	inter:4263	intergenic.NA	0.0142484	hypo
chr15	37387081	37390670	shore:32822/island:17942/shore:32823/island:17943/shore:32824	promoter.MEIS2/CDS.MEIS2/5UTR.MEIS2/exon.MEIS2/intron.MEIS2	0.0142629	hyper
chr11	128693231	128695410	shore:27639/island:15119/shore:27640	intergenic.NA	0.0143871	hyper
chr12	54942841	54943950	inter:11752	promoter.PDE1B/1to5kb.PDE1B/CDS.PDE1B/5UTR.PDE1B/exon.PDE1B/intron.PDE1B	0.014402	hyper
chr18	11147101	11150160	shore:39699/island:21779/shore:39700	promoter.PIEZO2/1to5kb.PIEZO2/CDS.PIEZO2/5UTR.PIEZO2/exon.PIEZO2/intron.PIEZO2	0.0144721	hyper
chr19	41931261	41932690	inter:17266	promoter.NA/CDS.B3GNT8/CDS.NA/5UTR.B3GNT8/exon.B3GNT8/exon.NA/intron.NA/3UTR.B3GNT8/intergenic.NA	0.0145323	hyper
chr3	10490911	10491570	inter:3231	CDS.ATP2B2/5UTR.ATP2B2/exon.ATP2B2/intron.ATP2B2	0.0145323	hypo
chr7	149460711	149463590	shore:18628/island:10160/shore:18629	CDS.ZNF467/exon.ZNF467/intron.ZNF467/3UTR.ZNF467/intergenic.NA	0.0145323	hyper
chr1	173638431	173639340	shore:3550/island:1932/shore:3551	promoter.ANKRD45/5UTR.ANKRD45/exon.ANKRD45/intron.ANKRD45	0.0146033	hyper
chr6	29759791	29760640	shore:14430/island:7867	CDS.NA/exon.NA/exon.HCG4/intron.NA/3UTR.NA	0.0146033	hyper
chr6	28410801	28412150	inter:5968	promoter.ZSCAN23/5UTR.ZSCAN23/exon.ZSCAN23/intron.ZSCAN23	0.0146033	hyper
chr17	78448981	78453090	shore:39186/island:21478/shore:39187	promoter.NPTX1/1to5kb.NPTX1/CDS.NPTX1/5UTR.NPTX1/exon.NPTX1/intron.NPTX1	0.0146702	hyper
chr11	61322411	61323960	shore:26300/island:14396/shore:26301	promoter.SYT7/CDS.SYT7/exon.SYT7/intron.SYT7	0.014676	hyper
chr12	114851721	114852610	shore:29324/island:16020/shore:29325	intergenic.NA	0.0146982	hyper
chr8	37625121	37625730	inter:8094	intron.PLPBP	0.014775	hyper
chr7	2081391	2087220	inter:6830/shelf:14340	intron.MAD1L1	0.0147791	hyper
chr4	81105951	81107450	shore:10881	promoter.PRDM8/5UTR.PRDM8/exon.PRDM8/intron.PRDM8	0.0148254	hyper
chr20	3652341	3655050	shore:44915/island:24838/shore:44916	promoter.ADAM33/1to5kb.ADAM33/1to5kb.NA/CDS.ADAM33/5UTR.ADAM33/exon.ADAM33/intron.ADAM33/3UTR.ADAM33	0.0148796	hyper
chr12	2861821	2862930	island:15213/shore:27818	intergenic.NA	0.0150011	hyper
chr3	96531831	96534510	shore:8695/island:4712/shore:8696	promoter.EPHA6/1to5kb.EPHA6/CDS.EPHA6/5UTR.EPHA6/exon.EPHA6/intron.EPHA6	0.0150124	hyper
chr15	30212651	30212920	inter:13400	intergenic.NA	0.0151063	hypo
chr20	62600381	62601130	shore:46162/island:25532	intron.ZNF512B	0.015131	hyper
chr19	37996961	37998410	shore:43100/island:23793/shore:43101	promoter.ZNF793/1to5kb.ZNF793/5UTR.ZNF793/exon.ZNF793/intron.ZNF793	0.0155026	hyper
chr8	35092381	35094400	shore:19667/island:10740/shore:19668/island:10741/shore:19669	promoter.UNC5D/CDS.UNC5D/5UTR.UNC5D/exon.UNC5D/intron.UNC5D	0.0155026	hyper
chr12	33590991	33593350	shore:28198/island:15412/shore:28199	promoter.SYT10/CDS.SYT10/5UTR.SYT10/exon.SYT10/intron.SYT10	0.0155117	hyper
chr8	50891441	50892530	inter:8167	intron.SNTG1	0.0156489	hypo
chr1	39043761	39044850	shore:1655/island:917/shore:1656	intergenic.NA	0.0157178	hyper
chr1	39957341	39958400	island:927/shore:1676	CDS.BMP8A/5UTR.BMP8A/exon.BMP8A/intron.BMP8A	0.0157344	hyper
chr12	4917991	4921010	shore:27863/island:15237/shore:27864	promoter.KCNA6/promoter.NA/1to5kb.NA/CDS.KCNA6/CDS.NA/5UTR.KCNA6/exon.KCNA6/exon.NA/3UTR.KCNA6	0.0157443	hyper
chr3	48692541	48695050	shore:8256/island:4474/shore:8257	1to5kb.CELSR3/CDS.CELSR3/exon.CELSR3/intron.CELSR3	0.0158435	hyper
chr5	63461231	63462580	shore:12331/island:6709/shore:12332	promoter.RNF180/5UTR.RNF180/exon.RNF180/intron.RNF180	0.0158751	hyper
chr12	104697001	104698260	shore:29114/island:15905/shore:29115	promoter.EID3/CDS.EID3/5UTR.EID3/exon.EID3/intron.TXNRD1	0.0158765	hyper
chr14	105037061	105037960	inter:13261/shelf:27918	intergenic.NA	0.0159271	hypo
chr11	114123291	114123590	inter:11215	1to5kb.NNMT/intergenic.NA	0.01595	hypo
chr16	89267141	89269750	shore:36506/island:20006/shore:36507/island:20007/shore:36508	promoter.SLC22A31/1to5kb.SLC22A31	0.0159737	hyper
chr19	19006241	19007640	island:23493/shore:42576	promoter.GDF1/promoter.CERS1/CDS.GDF1/CDS.CERS1/5UTR.GDF1/5UTR.CERS1/exon.GDF1/exon.CERS1/intron.GDF1/intron.CERS1	0.0160114	hyper
chr22	50622621	50624190	shore:48119/island:26584	promoter.TRABD/1to5kb.TRABD	0.0160114	hyper
chr20	62368331	62370700	shore:46120/island:25505	promoter.SLC2A4RG/1to5kb.SLC2A4RG/CDS.LIME1/5UTR.LIME1/exon.ZGPAT/exon.LIME1/intron.ZGPAT/intron.LIME1/3UTR.LIME1	0.0161901	hyper
chr16	6532591	6534260	shore:34746/island:19034/shore:34747	promoter.RBFOX1/1to5kb.RBFOX1/CDS.RBFOX1/5UTR.RBFOX1/exon.RBFOX1/intron.RBFOX1	0.0162307	hyper
chr13	46425201	46426230	inter:12475	promoter.SIAH3/CDS.SIAH3/5UTR.SIAH3/exon.SIAH3/intron.SIAH3	0.0162513	hyper
chr13	100626821	100628470	shelf:26482	1to5kb.ZIC5	0.0164926	hyper
chr1	149718151	149719870	shore:3001/island:1639/shore:3002/island:1640/shore:3003	promoter.NA/1to5kb.NA/exon.NA	0.0164926	hyper
chr20	39994331	39996430	shore:45449/island:25129/shore:45450	promoter.EMILIN3/CDS.EMILIN3/5UTR.EMILIN3/exon.EMILIN3/intron.EMILIN3	0.0166448	hyper
chr19	50829401	50830110	shore:44137	1to5kb.NR1H2/1to5kb.KCNC3/intron.KCNC3	0.01665	hyper
chr4	4387331	4389900	shore:10229/island:5550	promoter.NSG1/CDS.NSG1/5UTR.NSG1/exon.NSG1/intron.NSG1	0.016665	hyper
chr6	27250461	27252290	inter:5947	promoter.NA/1to5kb.NA/exon.NA	0.0166741	hyper
chr7	65037341	65038200	shore:17535/island:9585/shore:17536	intergenic.NA	0.0168136	hyper
chr10	107453131	107453440	inter:10166	intergenic.NA	0.0168609	hypo
chr3	147087291	147087980	inter:3916	intergenic.NA	0.0168609	hyper
chr11	27015501	27016690	inter:10613	promoter.FIBIN/CDS.FIBIN/5UTR.FIBIN/exon.FIBIN	0.0168609	hyper
chr1	246950261	246950650	shore:4497	1to5kb.LINC01341/intron.LINC01341	0.0169023	hypo
chr7	23528241	23531010	shelf:14668/shore:16955/island:9261/shore:16956	promoter.RPS2P32/1to5kb.RPS2P32/CDS.RPS2P32/5UTR.RPS2P32/exon.RPS2P32/3UTR.RPS2P32	0.0169296	hyper
chr3	85007611	85009130	shore:8667/island:4698/shore:8668	promoter.CADM2/CDS.CADM2/5UTR.CADM2/exon.CADM2/intron.CADM2	0.0169423	hyper
chr1	38100231	38101120	island:899/shore:1623	promoter.RSPO1/5UTR.RSPO1/exon.RSPO1/intron.RSPO1	0.0169898	hyper
chr4	11652241	11652640	inter:4349	intergenic.NA	0.0170041	hypo
chr5	11903011	11905060	shore:12039/island:6551/shore:12040	promoter.CTNND2/CDS.CTNND2/5UTR.CTNND2/exon.CTNND2/intron.CTNND2	0.0170041	hyper
chr7	96641841	96643070	shelf:15514	promoter.DLX6-AS1/1to5kb.DLX6-AS1/intron.DLX6-AS1	0.0171545	hyper
chr22	40023191	40023480	inter:18874	intron.CACNA1I	0.0171869	hypo
chr11	128556051	128557390	inter:11331/shelf:23839	promoter.FLI1/promoter.NA/5UTR.FLI1/exon.FLI1/exon.NA/intron.FLI1/intron.NA	0.0171869	hyper
chr17	8868201	8870030	shore:37143/island:20363/shore:37144	promoter.PIK3R5/1to5kb.PIK3R5/5UTR.PIK3R5/exon.PIK3R5/intron.PIK3R5	0.0172451	hyper
chr9	96722641	96723650	island:11919/shore:21829	1to5kb.NA	0.0172757	hyper
chr2	80325601	80326220	inter:2324	intron.CTNNA2	0.0172846	hypo
chr5	54525381	54526130	shore:12272	1to5kb.MCIDAS	0.0173495	hyper
chr8	140757481	140758490	inter:8471	intron.TRAPPC9	0.0173808	hyper
chr6	10409741	10412440	shore:14083/island:7675/shore:14084/island:7676	promoter.TFAP2A-AS1/1to5kb.TFAP2A-AS1/CDS.TFAP2A/5UTR.TFAP2A/exon.TFAP2A/intron.TFAP2A/3UTR.TFAP2A	0.0173886	hyper
chr11	1411281	1412450	island:13933/shore:25456	CDS.BRSK2/5UTR.BRSK2/exon.BRSK2/intron.BRSK2	0.0174035	hyper
chr19	1757051	1759040	shore:40862/island:22473/shore:40863	intron.ONECUT3	0.0174442	hyper
chr19	3865861	3866190	shelf:35027	intron.ZFR2	0.0174601	hypo
chr12	81101421	81103090	shore:28937/island:15813/shore:28938	CDS.MYF6/5UTR.MYF6/exon.MYF6/intron.MYF6/3UTR.MYF6	0.0174862	hyper
chr13	84455321	84456830	shore:30594/shelf:26412	promoter.SLITRK1/CDS.SLITRK1/5UTR.SLITRK1/exon.SLITRK1	0.01754	hyper
chr17	6678951	6680230	shore:36965/island:20261/shore:36966	promoter.FBXO39/5UTR.FBXO39/exon.XAF1/exon.FBXO39/intron.FBXO39/3UTR.XAF1	0.0175642	hyper
chr19	45736871	45738760	shore:43617/island:24091/shore:43618	promoter.EXOC3L2/1to5kb.EXOC3L2/5UTR.EXOC3L2/exon.EXOC3L2/intron.EXOC3L2	0.0176648	hyper
chr11	505691	506070	shore:25313	1to5kb.RNH1/intron.RNH1	0.0176828	hypo
chr2	109744571	109747120	shore:5971/island:3229/shore:5972	promoter.SH3RF3/promoter.SH3RF3-AS1/1to5kb.SH3RF3/CDS.SH3RF3/CDS.SH3RF3-AS1/5UTR.SH3RF3-AS1/exon.SH3RF3/exon.SH3RF3-AS1/intron.SH3RF3/3UTR.SH3RF3-AS1	0.0177269	hyper
chr11	69831271	69833010	shore:26878/island:14720/shore:26879	intergenic.NA	0.0177931	hyper
chr17	80328851	80330840	shore:39440/island:21630/shore:39441	1to5kb.UTS2R	0.017908	hyper
chr8	3100281	3100650	inter:7905	intron.CSMD1	0.0179393	hypo
chr11	635381	641140	shore:25340/island:13860/shore:25341/island:13861/shore:25342	promoter.DRD4/1to5kb.DRD4/CDS.DRD4/exon.DRD4/intron.DRD4/3UTR.DRD4/intergenic.NA	0.0180361	hyper
chr3	157820221	157822380	shore:9382/island:5070/shore:9383	CDS.SHOX2/exon.SHOX2/intron.SHOX2	0.0180947	hyper
chr13	25874631	25875630	shore:30170/island:16491	promoter.NUP58/1to5kb.NUP58	0.0181285	hyper
chr12	130208931	130209400	inter:12208	intron.TMEM132D	0.018188	hypo
chr14	101377171	101377660	inter:13199	promoter.NA/1to5kb.NA/exon.NA	0.0183529	hypo
chr8	25898881	25902580	shore:19562/island:10685/shore:19563/island:10686	CDS.EBF2/5UTR.EBF2/exon.EBF2/intron.PPP2R2A/intron.EBF2	0.0183529	hyper
chr20	6750261	6751480	shore:44984/island:24874/shore:44985	CDS.BMP2/5UTR.BMP2/exon.BMP2/intron.BMP2	0.0184155	hyper
chr14	92789151	92790980	island:17513/shore:32036/island:17514/shore:32037	promoter.SLC24A4/1to5kb.SLC24A4/CDS.SLC24A4/5UTR.SLC24A4/exon.SLC24A4/intron.SLC24A4	0.0185109	hyper
chr9	89560261	89561380	shore:21698/island:11850	1to5kb.GAS1RR/CDS.GAS1/exon.GAS1/3UTR.GAS1	0.0185109	hyper
chr11	17756571	17758520	island:14134/shore:25824	promoter.KCNC1/CDS.KCNC1/5UTR.KCNC1/exon.KCNC1/intron.KCNC1	0.0185315	hyper
chr7	28447701	28448420	shore:17060	promoter.NA/1to5kb.NA/1to5kb.CREB5/intron.CREB5	0.0185515	hyper
chr18	36696131	36696640	inter:16175	intergenic.NA	0.0185778	hypo
chr4	44449061	44451340	shore:10620/island:5766/shore:10621	promoter.KCTD8/CDS.KCTD8/5UTR.KCTD8/exon.KCTD8/intron.KCTD8	0.0186571	hyper
chr5	50521	54710	shore:11693/island:6345/shore:11694/island:6346/shore:11695	intergenic.NA	0.0186783	hyper
chr2	232156041	232157100	inter:3021	CDS.ARMC9/exon.ARMC9/intron.ARMC9	0.0187047	hyper
chr7	127743131	127745500	shore:18333/island:10006/shore:18334	intergenic.NA	0.0188771	hyper
chr5	92905861	92909680	shore:12606/island:6855/shore:12607	promoter.NR2F1-AS1/1to5kb.NR2F1-AS1/exon.NR2F1-AS1/intron.NR2F1-AS1	0.0189099	hyper
chr8	91996791	91998230	shore:20174/island:11010/shore:20175	promoter.C8orf88/5UTR.C8orf88/exon.C8orf88/intron.C8orf88	0.0189463	hyper
chr1	206135161	206139120	shore:3890/island:2109/shore:3891	promoter.FAM72A/1to5kb.FAM72A/5UTR.FAM72A/exon.FAM72A	0.0190036	hyper
chr8	120684401	120686080	inter:8418	intergenic.NA	0.0190065	hyper
chr2	219921771	219922780	shore:7085/island:3840	CDS.IHH/exon.IHH/intron.IHH	0.0190171	hyper
chr4	185024851	185025340	inter:4859	intron.ENPP6	0.0190978	hypo
chr20	44685461	44688190	shore:45563/island:25191/shore:45564	CDS.SLC12A5/exon.SLC12A5/intron.SLC12A5/3UTR.SLC12A5	0.0192182	hyper
chr4	168154151	168156040	shore:11470/island:6224/shore:11471	promoter.SPOCK3/CDS.SPOCK3/5UTR.SPOCK3/exon.SPOCK3/intron.SPOCK3	0.0192496	hyper
chr1	2366031	2366570	inter:70	intergenic.NA	0.0192743	hypo
chr1	149155451	149156940	shore:2968/island:1621/shore:2969	promoter.NA/1to5kb.NA/exon.NA/intergenic.NA	0.0192999	hyper
chr11	8121661	8122330	inter:10513	CDS.TUB/exon.TUB/intron.TUB	0.0195438	hypo
chr20	48251481	48253160	inter:18093	CDS.B4GALT5/exon.B4GALT5/intron.B4GALT5/3UTR.B4GALT5	0.0195723	hyper
chr16	31579471	31581520	shore:35358/island:19365/shore:35359/island:19366/shore:35360	promoter.YBX3P1/CDS.YBX3P1/5UTR.YBX3P1/exon.YBX3P1/3UTR.YBX3P1	0.0196538	hyper
chr11	71951091	71952840	island:14751/shore:26938/island:14752/shore:26939	CDS.PHOX2A/exon.PHOX2A/intron.PHOX2A	0.0196968	hyper
chr22	50063531	50065860	shore:48053/island:26544/shore:48054	intergenic.NA	0.0196988	hyper
chr19	57018511	57019820	shore:44580/island:24655/shore:44581	promoter.ZNF471/5UTR.ZNF471/exon.ZNF471/intron.ZNF471	0.0197418	hyper
chr2	95401061	95401960	shore:5734/island:3104/shore:5735	intergenic.NA	0.0197568	hyper
chr4	8783851	8784300	inter:4330	intergenic.NA	0.0199495	hypo
chr22	43263991	43265260	shore:47797	intergenic.NA	0.020117	hyper
chr6	100054411	100056010	shore:15345/island:8359/shore:15346/island:8360/shore:15347	promoter.PRDM13/CDS.PRDM13/5UTR.PRDM13/exon.PRDM13/intron.PRDM13	0.0201401	hyper
chr8	97165341	97167780	inter:8339/shelf:17518/shore:20220	intron.GDF6	0.0202027	hyper
chr3	149374401	149375360	shore:9303/island:5030	promoter.NA/promoter.WWTR1-AS1/promoter.WWTR1/1to5kb.WWTR1-AS1/CDS.WWTR1/5UTR.WWTR1/exon.NA/exon.WWTR1/intron.NA/intron.WWTR1	0.0203838	hyper
chr6	99282711	99284170	island:8344/shore:15322	CDS.POU3F2/5UTR.POU3F2/exon.POU3F2/3UTR.POU3F2	0.0204116	hyper
chr9	119097051	119097540	inter:9154	CDS.PAPPA/exon.PAPPA/intron.PAPPA/3UTR.PAPPA	0.0204175	hypo
chr9	112402231	112403810	shore:22062/island:12044/shore:22063	promoter.PALM2/CDS.PALM2/5UTR.PALM2/exon.PALM2/intron.PALM2	0.0204175	hyper
chr12	108168701	108169870	shore:29165/island:15932/shore:29166	CDS.ASCL4/5UTR.ASCL4/exon.ASCL4/3UTR.ASCL4	0.0204175	hyper
chr14	105993211	105994300	island:17767	promoter.NA/1to5kb.NA/exon.NA/intron.TMEM121/intron.NA	0.0204805	hyper
chr1	120835671	120839630	shore:2767/island:1504/shore:2768	promoter.FAM72B/1to5kb.FAM72B/5UTR.FAM72B/exon.FAM72B	0.020577	hyper
chr16	48844131	48845670	shore:35516/island:19447/shore:35517	intergenic.NA	0.020577	hyper
chr19	19373241	19373920	shore:42609	promoter.HAPLN4/CDS.HAPLN4/5UTR.HAPLN4/exon.HAPLN4/intron.HAPLN4	0.020577	hyper
chr2	222433961	222436110	shelf:6256/shore:7151/island:3879	1to5kb.NA/intron.EPHA4	0.0206265	hyper
chr6	124123911	124125510	shore:15567/island:8482/shore:15568	promoter.NKAIN2/1to5kb.NKAIN2/CDS.NKAIN2/5UTR.NKAIN2/exon.NKAIN2/intron.NKAIN2	0.0206796	hyper
chr20	43030241	43031530	inter:18031	promoter.NA/CDS.HNF4A/exon.HNF4A/exon.NA/intron.HNF4A/intron.NA	0.020694	hyper
chr7	93203401	93205250	shore:17882/island:9766/shore:17883	promoter.CALCR/1to5kb.CALCR/5UTR.CALCR/exon.CALCR/intron.CALCR	0.0207972	hyper
chr20	62102301	62104110	shore:46071/island:25471/shore:46072	promoter.KCNQ2/CDS.KCNQ2/5UTR.KCNQ2/exon.KCNQ2/intron.KCNQ2	0.0208783	hyper
chr2	108602541	108603690	shore:5957/island:3222/shore:5958	promoter.SLC5A7/5UTR.SLC5A7/exon.SLC5A7/intron.SLC5A7	0.0209268	hyper
chr20	13200181	13201170	shore:45014/island:24890	promoter.NA/1to5kb.ISM1/exon.NA	0.0209596	hyper
chr4	4859131	4860470	shore:10237/island:5555/shore:10238	promoter.MSX1/1to5kb.MSX1	0.0209885	hyper
chr7	121949941	121951230	shore:18300/island:9988/shore:18301	exon.FEZF1-AS1/intergenic.NA	0.021213	hyper
chr8	17269941	17271650	shore:19415/island:10609/shore:19416	promoter.MTMR7/CDS.MTMR7/5UTR.MTMR7/exon.MTMR7/intron.MTMR7	0.0212681	hyper
chr16	58496211	58498900	shore:35708/island:19554/shore:35709	promoter.NDRG4/1to5kb.NDRG4/CDS.NDRG4/5UTR.NDRG4/exon.NDRG4/intron.NDRG4	0.0212946	hyper
chr17	76966011	76967340	inter:15863	exon.LGALS3BP/3UTR.LGALS3BP/intergenic.NA	0.0213058	hyper
chr10	134510911	134514150	inter:10345	CDS.INPP5A/exon.INPP5A/intron.INPP5A	0.0213058	hyper
chr12	103888941	103890140	shore:29093/island:15894/shore:29094	promoter.C12orf42/5UTR.C12orf42/exon.C12orf42/intron.C12orf42	0.021378	hyper
chr10	17270421	17272120	shore:23447/island:12819	promoter.NA/CDS.VIM/5UTR.VIM/exon.VIM/exon.NA/intron.VIM/intron.NA	0.0213792	hyper
chr5	33935871	33939500	shore:12127/island:6597/shore:12128	promoter.RXFP3/CDS.RXFP3/5UTR.RXFP3/exon.RXFP3/3UTR.RXFP3/intergenic.NA	0.0216457	hyper
chr16	88366781	88367160	inter:14799	intergenic.NA	0.0216975	hypo
chr20	21000511	21001550	shore:45081/island:24927/shore:45082	intergenic.NA	0.0216975	hyper
chr19	39054991	39057270	shore:43173/island:23834/shore:43174	CDS.RYR1/exon.RYR1/intron.RYR1	0.0216975	hyper
chr9	89517401	89518090	inter:8940	intergenic.NA	0.0218398	hyper
chr2	132794891	132796710	shore:6374/island:3448/shore:6375	intergenic.NA	0.0218554	hyper
chr7	39015251	39016260	shore:17173/island:9388/shore:17174	1to5kb.POU6F2	0.0218881	hyper
chr5	3116251	3117010	inter:4987	intergenic.NA	0.0218931	hyper
chr22	37823521	37824410	island:26265/shore:47520	promoter.ELFN2	0.0220393	hyper
chr2	74641461	74643660	shore:5537/island:2999/shore:5538	promoter.NA/1to5kb.NA/CDS.C2orf81/exon.NA/exon.C2orf81/intron.C2orf81	0.0221002	hyper
chr22	39953241	39955440	shore:47654/island:26336/shore:47655	intergenic.NA	0.0221002	hyper
chr10	37009381	37009800	inter:9705	intergenic.NA	0.02234	hypo
chr10	43392871	43395040	shore:23676/island:12941/shore:23677	intergenic.NA	0.0223574	hyper
chr1	18960671	18961250	shore:967	CDS.PAX7/exon.PAX7/intron.PAX7	0.0224613	hyper
chr12	54424381	54425840	shore:28607/island:15636/shore:28608	promoter.HOXC5/1to5kb.HOXC5/1to5kb.MIR615/exon.HOXC6/intron.HOXC5/intron.HOXC4/3UTR.HOXC6	0.0224794	hyper
chr1	181452431	181453330	shore:3640/island:1978/shore:3641	promoter.CACNA1E/CDS.CACNA1E/5UTR.CACNA1E/exon.CACNA1E/intron.CACNA1E	0.0224891	hyper
chr1	210110901	210112340	shore:3944/island:2137/shore:3945	promoter.SYT14/CDS.SYT14/5UTR.SYT14/exon.SYT14/intron.SYT14	0.0224972	hyper
chr8	11561181	11563200	island:10580/shore:19361	promoter.GATA4/1to5kb.GATA4/5UTR.GATA4/exon.GATA4/intron.GATA4	0.0226303	hyper
chr19	58861041	58863160	shore:44719/island:24728/shore:44720	promoter.A1BG-AS1/1to5kb.A1BG-AS1/CDS.A1BG/exon.A1BG/intron.A1BG-AS1/intron.A1BG	0.022832	hyper
chr5	176056271	176057700	shore:13621/island:7415/shore:13622	promoter.EIF4E1B/promoter.SNCB/promoter.MIR4281/1to5kb.EIF4E1B/1to5kb.MIR4281/CDS.SNCB/5UTR.EIF4E1B/5UTR.SNCB/exon.EIF4E1B/exon.SNCB/exon.MIR4281/intron.SNCB	0.022832	hyper
chr1	91171801	91173170	shore:2392/island:1306/shore:2393	intergenic.NA	0.0229567	hyper
chr14	70325611	70325970	inter:12997	intergenic.NA	0.0229814	hypo
chr1	25809761	25811050	inter:417	CDS.MACO1/exon.MACO1/intron.MACO1	0.0230165	hyper
chr7	108095071	108098020	shore:18235/island:9954/shore:18236	promoter.NRCAM/1to5kb.NRCAM/5UTR.NRCAM/exon.NRCAM/intron.NRCAM	0.0233529	hyper
chr2	142887441	142888870	shore:6425/island:3475/shore:6426	CDS.LRP1B/5UTR.LRP1B/exon.LRP1B/intron.LRP1B	0.0233765	hyper
chr13	20750511	20752360	shore:30040/island:16424/shore:30041	intergenic.NA	0.0234958	hyper
chr9	137255321	137256350	shelf:19729	intron.RXRA	0.0235221	hyper
chr5	139091301	139092070	shore:13031	intergenic.NA	0.023588	hyper
chr14	45380921	45382090	inter:12848	intergenic.NA	0.0236519	hyper
chr20	47300761	47301510	inter:18084	intron.PREX1	0.0236583	hyper
chr19	54465211	54467110	shore:44378/island:24533/shore:44379	promoter.CACNG8/1to5kb.CACNG8/CDS.CACNG8/5UTR.CACNG8/exon.CACNG8/intron.CACNG8	0.0236737	hyper
chr6	37615801	37617480	shore:14797/island:8066/shore:14798/island:8067/shore:14799	promoter.MDGA1/1to5kb.MDGA1/CDS.MDGA1/exon.MDGA1/intron.MDGA1	0.0237137	hyper
chr15	21954131	21954570	inter:13334	intergenic.NA	0.0237137	hypo
chr5	92930261	92932840	shore:12613/island:6860/shore:12614/shelf:11026	intergenic.NA	0.0237278	hyper
chr19	49668551	49669910	shore:44005/island:24315/shore:44006	CDS.TRPM4/5UTR.TRPM4/exon.TRPM4/intron.TRPM4	0.0237278	hyper
chr1	177133191	177134200	shore:3574/island:1944/shore:3575	promoter.ASTN1/CDS.ASTN1/5UTR.ASTN1/exon.ASTN1/intron.ASTN1	0.0237811	hyper
chr19	53757561	53760000	shore:44330/island:24506/shore:44331	promoter.ZNF677/1to5kb.VN1R2/1to5kb.ZNF677/5UTR.ZNF677/exon.ZNF677/intron.ZNF677	0.0238159	hyper
chr19	56879091	56880230	shore:44572/island:24651/shore:44573	promoter.ZNF542P/promoter.ZSCAN5A/5UTR.ZNF542P/5UTR.ZSCAN5A/exon.ZNF542P/exon.ZSCAN5A/intron.ZNF542P/intron.ZSCAN5A	0.0238271	hyper
chr5	35990871	35991630	inter:5072	promoter.UGT3A1/CDS.UGT3A1/5UTR.UGT3A1/exon.UGT3A1/intron.UGT3A1	0.0239317	hyper
chr19	54481111	54482170	shore:44380/island:24534/shore:44381	1to5kb.MIR935/CDS.CACNG8/exon.CACNG8/intron.CACNG8	0.0239618	hyper
chr19	15334251	15335460	island:23308/shore:42252	intergenic.NA	0.0240052	hyper
chr2	3749701	3752160	shore:4681/island:2537/shore:4682	CDS.ALLC/exon.ALLC/intron.ALLC/3UTR.ALLC/intergenic.NA	0.024126	hyper
chr1	242540271	242540630	inter:1822	intron.PLD5	0.0241288	hypo
chr10	101297211	101297950	island:13339/shore:24438/island:13340/shore:24439	intergenic.NA	0.0241512	hyper
chr17	40835751	40838380	island:20829/shore:38005/island:20830/shore:38006	1to5kb.CCR10/CDS.CNTNAP1/exon.CNTNAP1/intron.CNTNAP1	0.0241768	hyper
chr6	50675241	50677040	inter:6234	1to5kb.TFAP2D/intergenic.NA	0.0242105	hyper
chr3	131245411	131246700	shore:9098/island:4918/shore:9099	intergenic.NA	0.024483	hyper
chr1	149332641	149334360	shore:2980/island:1627/shore:2981/island:1628/shore:2982	promoter.NA/1to5kb.NA/exon.NA/intergenic.NA	0.0245754	hyper
chr20	43437811	43440540	shore:45496/island:25153/shore:45497	promoter.RIMS4/1to5kb.RIMS4/CDS.RIMS4/5UTR.RIMS4/exon.RIMS4/intron.RIMS4	0.0245964	hyper
chr1	2388811	2389170	shore:318	intergenic.NA	0.024714	hypo
chr12	117503931	117505120	inter:12066	intron.TESC	0.024714	hyper
chr13	36919241	36921240	shore:30310/island:16570/shore:30311	promoter.SPART-AS1/promoter.SPART/1to5kb.SPART-AS1/5UTR.SPART/exon.SPART-AS1/exon.SPART/intron.SPART-AS1/intron.SPART	0.024714	hyper
chr20	39311071	39312740	shore:45436/island:25121/shore:45437	intergenic.NA	0.024714	hyper
chr13	103046351	103048050	shore:30697/island:16781/shore:30698	promoter.FGF14-AS2/promoter.FGF14-IT1/1to5kb.FGF14-IT1/exon.FGF14-AS2/exon.FGF14-IT1/intron.FGF14/intron.FGF14-IT1	0.024714	hyper
chr1	228785651	228786570	shore:4273/island:2320/shore:4274	CDS.DUSP5P1/5UTR.DUSP5P1/exon.DUSP5P1/intron.DUSP5P1/intron.RHOU/3UTR.DUSP5P1	0.0247907	hyper
chr6	83007441	83007970	inter:6316	intergenic.NA	0.0249688	hypo
chr21	46125681	46128240	shore:46677/island:25811/shore:46678	intron.TSPEAR	0.0249841	hyper
chr6	58179821	58180760	shore:15110/island:8234/shore:15111	intergenic.NA	0.0250112	hyper
chr20	43944501	43945970	shore:45517/island:25165/shore:45518	CDS.RBPJL/exon.RBPJL/intron.RBPJL/3UTR.RBPJL	0.0250207	hyper
chr14	65233331	65234100	inter:12962	CDS.SPTB/exon.SPTB/intron.SPTB/3UTR.SPTB	0.0251778	hypo
chr2	5521451	5521660	inter:1932	intergenic.NA	0.0251845	hypo
chr2	106231041	106231690	inter:2474	1to5kb.LOC285000	0.0252294	hyper
chr7	1268901	1271290	shore:16429/island:8960	1to5kb.UNCX	0.0252294	hyper
chr18	71839931	71841700	inter:16285	intergenic.NA	0.025301	hypo
chr17	33775061	33777150	shore:37681/island:20651/shore:37682/island:20652/shore:37683	promoter.SLFN13/1to5kb.SLFN13/5UTR.SLFN13/exon.SLFN13/intron.SLFN13	0.025301	hyper
chr20	61339481	61341560	shore:45948/island:25399/shore:45949	promoter.NTSR1/CDS.NTSR1/5UTR.NTSR1/exon.NTSR1/intron.NTSR1	0.0253565	hyper
chr20	20420981	20421690	inter:17857	intron.RALGAPA2	0.0254235	hyper
chr5	98128641	98129420	inter:5295	CDS.RGMB/exon.RGMB/intron.RGMB	0.025426	hyper
chr17	1173571	1175290	island:20125/shore:36719	promoter.BHLHA9/CDS.BHLHA9/exon.BHLHA9/intergenic.NA	0.025426	hyper
chr10	46969721	46972210	shore:23771/island:12989/shore:23772	promoter.SYT15/1to5kb.SYT15/CDS.SYT15/5UTR.SYT15/exon.SYT15/intron.SYT15	0.0254868	hyper
chr6	116885851	116886700	inter:6438	intergenic.NA	0.0254868	hyper
chr3	184293391	184294060	shelf:8471	CDS.EPHB3/exon.EPHB3/intron.EPHB3	0.0256516	hyper
chr7	19183231	19185380	shore:16900/island:9232/shore:16901/island:9233/shore:16902	promoter.NA/promoter.FERD3L/CDS.FERD3L/5UTR.FERD3L/exon.NA/exon.FERD3L/intron.NA/3UTR.FERD3L	0.0257866	hyper
chr2	217235811	217236680	shore:7009/island:3798	5UTR.MARCH4/exon.MARCH4	0.0257887	hyper
chr3	24870341	24872580	shore:7918/island:4295/shore:7919	intergenic.NA	0.0260996	hyper
chr1	942191	942810	inter:15	intergenic.NA	0.0261326	hypo
chr12	49659631	49660710	shore:28366	intron.TUBA1C	0.0261792	hypo
chr10	102905461	102906950	shore:24534/island:13399/shore:24535	intergenic.NA	0.0262985	hyper
chr10	135049801	135051090	island:13769	promoter.VENTX/1to5kb.VENTX	0.0263538	hyper
chr12	54348521	54349850	shore:28583/island:15620/shore:28584	promoter.HOXC12/CDS.HOXC12/exon.HOXC12/intron.HOXC12	0.0264579	hyper
chr18	4453621	4455930	shore:39623/island:21737/shore:39624	promoter.DLGAP1/5UTR.DLGAP1/exon.DLGAP1/intron.DLGAP1	0.0265031	hyper
chr1	224693701	224694280	inter:1689	intergenic.NA	0.0266077	hyper
chr22	50452801	50453760	shore:48097/island:26570	1to5kb.IL17REL	0.0267518	hyper
chr4	5889011	5890820	shore:10256/island:5568/shore:10257	promoter.CRMP1/CDS.CRMP1/5UTR.CRMP1/exon.CRMP1/intron.CRMP1	0.0273541	hyper
chr20	30062721	30063780	shore:45170/island:24979/shore:45171	promoter.REM1/1to5kb.DEFB124/1to5kb.NA/5UTR.REM1/exon.REM1/intron.REM1	0.027378	hyper
chr3	184300731	184302510	shore:9602/island:5185/shore:9603	intergenic.NA	0.0274288	hyper
chr8	121136801	121138720	shore:20397/island:11129/shore:20398	promoter.COL14A1/5UTR.COL14A1/exon.COL14A1/intron.COL14A1	0.027596	hyper
chr19	51814651	51815760	shore:44223/island:24448/shore:44224	promoter.IGLON5/CDS.IGLON5/exon.IGLON5/intron.IGLON5	0.027596	hyper
chr6	105583851	105585910	shore:15383/island:8384/shore:15384	promoter.BVES-AS1/promoter.BVES/1to5kb.BVES-AS1/1to5kb.BVES/CDS.BVES-AS1/5UTR.BVES-AS1/5UTR.BVES/exon.BVES-AS1/exon.BVES/intron.BVES-AS1/intron.BVES	0.0277695	hyper
chr10	49731231	49732900	shore:23832/island:13020/shore:23833	intron.ARHGAP22	0.0277885	hyper
chr15	89910231	89912110	shore:33789/island:18450	promoter.MIR9-3/promoter.MIR9-3HG/1to5kb.MIR9-3/1to5kb.MIR9-3HG/exon.MIR9-3/exon.MIR9-3HG/intron.MIR9-3HG	0.0278228	hyper
chr14	77606611	77607780	island:17444	intron.ZDHHC22	0.0279761	hyper
chr2	119598811	119601280	shore:6100/island:3297/shore:6101/island:3298/shore:6102	CDS.EN1/exon.EN1/intron.EN1/3UTR.EN1/intergenic.NA	0.027998	hyper
chr12	8548621	8549350	shore:27985/island:15302	exon.LINC00937/intron.LINC00937	0.0281772	hyper
chr17	881681	882520	shore:36683/island:20106	intron.NXN	0.0282545	hyper
chr2	73146761	73148570	island:2975/shore:5491	intron.EMX1	0.0284829	hyper
chr1	167512701	167513150	inter:1403	intron.CREG1	0.0285243	hyper
chr18	73858751	73859270	inter:16296	intergenic.NA	0.0285346	hypo
chr2	220387731	220388360	island:3866/shore:7132	intron.ASIC4	0.0285851	hyper
chr6	159734701	159735140	shore:15919	intergenic.NA	0.0286854	hypo
chr5	140762111	140763490	shore:13187/island:7174/shore:13188	promoter.PCDHGA7/1to5kb.PCDHGA8/1to5kb.PCDHGB4/CDS.PCDHGA7/exon.PCDHGA7/intron.PCDHGA1/intron.PCDHGA2/intron.PCDHGA3/intron.PCDHGB1/intron.PCDHGA4/intron.PCDHGB2/intron.PCDHGA5/intron.PCDHGB3/intron.PCDHGA6	0.0287369	hyper
chr11	32459161	32460210	shore:25954/island:14209/shore:25955	promoter.NA/1to5kb.WT1/exon.WT1-AS/exon.NA/intron.WT1-AS	0.0287439	hyper
chr5	78365011	78366410	shore:12523/island:6810/shore:12524	promoter.BHMT2/promoter.DMGDH/CDS.BHMT2/CDS.DMGDH/5UTR.BHMT2/5UTR.DMGDH/exon.BHMT2/exon.DMGDH/intron.BHMT2/intron.DMGDH	0.0287902	hyper
chr11	16631631	16633080	shore:25792/island:14117/shore:25793	1to5kb.SOX6/intron.SOX6	0.0288111	hyper
chr19	9608501	9609900	shore:41743/island:23019/shore:41744	promoter.ZNF560/5UTR.ZNF560/exon.ZNF560/intron.ZNF560	0.0288419	hyper
chr14	62583421	62584820	shore:31634/island:17305/shore:31635	promoter.LINC00643/exon.LINC00643/intron.LINC00643	0.0291173	hyper
chr2	27484591	27485890	shore:4985/island:2702	1to5kb.SLC30A3/CDS.SLC30A3/5UTR.SLC30A3/exon.SLC30A3/intron.SLC30A3	0.0291324	hyper
chr13	79180941	79184180	shore:30578/island:16714/shore:30579/island:16715/shore:30580/island:16716/shore:30581	1to5kb.POU4F1/exon.RNF219-AS1/intron.RNF219-AS1	0.0293442	hyper
chr1	904931	910580	shore:36/island:21/shore:37/shelf:29	CDS.PLEKHN1/exon.PLEKHN1/exon.PERM1/intron.PLEKHN1/3UTR.PLEKHN1/3UTR.PERM1/intergenic.NA	0.0293681	hyper
chr5	87979541	87981560	shore:12585/island:6844/shore:12586	promoter.LINC00461/exon.LINC00461/intron.LINC00461	0.0295873	hyper
chr13	51417021	51418450	shore:30462/island:16651/shore:30463	promoter.DLEU7/CDS.DLEU7/5UTR.DLEU7/exon.DLEU7/intron.DLEU7-AS1/intron.DLEU7	0.0296284	hyper
chr3	54155191	54156340	shore:8476/island:4593	promoter.CACNA2D3/1to5kb.CACNA2D3	0.0296792	hyper
chr15	33602511	33604260	shore:32782/island:17922/shore:32783	promoter.RYR3/CDS.RYR3/5UTR.RYR3/exon.RYR3/intron.RYR3	0.0296792	hyper
chr4	82135441	82136830	shore:10899/island:5912/shore:10900	promoter.PRKG2/5UTR.PRKG2/exon.PRKG2/intron.PRKG2	0.0297345	hyper
chr16	3354701	3356800	shore:34622/island:18963/shore:34623	promoter.ZNF75A/promoter.TIGD7/1to5kb.ZNF75A/1to5kb.TIGD7/1to5kb.NA/5UTR.ZNF75A/5UTR.TIGD7/exon.ZNF75A/exon.TIGD7/intron.ZNF75A/intron.TIGD7	0.0298032	hyper
chr7	145262441	145263070	inter:7665	intergenic.NA	0.0298691	hypo
chr10	25506731	25507500	inter:9658	intron.GPR158	0.0300772	hypo
chr14	105393021	105393420	inter:13280	intron.PLD4	0.0302132	hypo
chr8	32405101	32407160	shore:19653/island:10733/shore:19654	promoter.NRG1/CDS.NRG1/5UTR.NRG1/exon.NRG1/intron.NRG1	0.0304281	hyper
chr13	36871391	36872560	shore:30308/island:16569/shore:30309	promoter.CCDC169-SOHLH2/promoter.CCDC169/CDS.CCDC169/5UTR.CCDC169-SOHLH2/5UTR.CCDC169/exon.CCDC169-SOHLH2/exon.CCDC169/intron.CCDC169-SOHLH2/intron.CCDC169	0.0304331	hyper
chr5	10564311	10565860	island:6547/shore:12032	promoter.ANKRD33B/CDS.ANKRD33B/5UTR.ANKRD33B/exon.ANKRD33B/intron.ANKRD33B	0.0304366	hyper
chr1	39980121	39982690	shore:1677/island:928/shore:1678	intron.BMP8A	0.0304797	hyper
chr14	61121781	61123260	shore:31611	intergenic.NA	0.0305469	hyper
chr6	99290071	99291000	shore:15323/island:8345/shore:15324	intergenic.NA	0.030578	hyper
chr3	132758931	132759350	shore:9110	intron.TMEM108	0.0306026	hypo
chr10	130084691	130085700	inter:10292	exon.NA/intron.NA	0.0306026	hyper
chr5	76928051	76929020	shore:12496/shelf:10928	intron.OTP	0.0306663	hyper
chr10	132876901	132877740	shelf:21647	intergenic.NA	0.0306965	hypo
chr6	78171931	78174400	shore:15195/island:8278/shore:15196	promoter.HTR1B/1to5kb.HTR1B/CDS.HTR1B/exon.HTR1B/intergenic.NA	0.0307068	hyper
chr19	29283991	29285330	shore:42740/island:23582/shore:42741	intergenic.NA	0.0308249	hyper
chr18	77382511	77382710	inter:16357	intergenic.NA	0.0308798	hypo
chr7	156791631	156792200	shore:18857	intron.MNX1	0.0309293	hyper
chr1	149784331	149785500	shore:3007/island:1643/shore:3008	promoter.HIST2H2BF/promoter.HIST2H3D/1to5kb.HIST2H2BF/CDS.HIST2H3D/exon.HIST2H3D/3UTR.HIST2H3D	0.0309985	hyper
chr17	43973261	43975230	island:20935/shore:38196	promoter.MAPT-AS1/1to5kb.MAPT-AS1/CDS.MAPT-IT1/exon.MAPT-IT1/intron.MAPT/3UTR.MAPT-IT1	0.0310058	hyper
chr19	58544251	58546590	shore:44687/island:24710/shore:44688	promoter.ZSCAN1/1to5kb.ZSCAN1/5UTR.ZSCAN1/exon.ZSCAN1/intron.ZSCAN1	0.031055	hyper
chr6	27549861	27551330	inter:5954	promoter.NA/exon.NA/intergenic.NA	0.0310957	hyper
chr12	57618261	57620000	shore:28731/island:15703/shore:28732	1to5kb.SHMT2/CDS.NXPH4/5UTR.NXPH4/exon.NXPH4/intron.NXPH4/3UTR.NXPH4	0.0310957	hyper
chr13	100610641	100612430	shore:30672/island:16767/shore:30673	intergenic.NA	0.0310957	hyper
chr22	43927991	43928460	inter:18947	intron.EFCAB6-AS1/intron.EFCAB6	0.0310957	hypo
chr18	60263051	60264450	shore:40173/island:22024/shore:40174	intergenic.NA	0.0312708	hyper
chr3	111411991	111412450	inter:3680	intron.PLCXD2	0.0315067	hyper
chr1	76080281	76081090	shore:2277/island:1245/shore:2278	1to5kb.SLC44A5/intron.SLC44A5	0.0315143	hyper
chr6	161799151	161799670	inter:6642	intron.PRKN	0.0315143	hypo
chr7	133811511	133812160	shore:18447/island:10068	promoter.LRGUK/CDS.LRGUK/5UTR.LRGUK/exon.LRGUK	0.0315449	hyper
chr22	50509641	50510170	inter:19055	intron.MLC1	0.0315455	hypo
chr11	32008501	32009500	shore:25945/island:14203/shore:25946	intron.RCN1	0.0315916	hyper
chr6	75915811	75918010	island:8274/shore:15188	promoter.COL12A1/1to5kb.COL12A1	0.0316424	hyper
chr6	101840521	101841790	shore:15372/island:8378	promoter.NA/1to5kb.GRIK2/exon.NA/intron.NA	0.0318612	hyper
chr10	119310931	119312300	shore:24784/island:13536/shore:24785	intergenic.NA	0.0318816	hyper
chr3	46274281	46274750	inter:3422	intron.CCR3	0.0319167	hypo
chr8	94697611	94698080	inter:8322	intron.LINC00535	0.0320213	hypo
chr19	36911941	36913200	shore:43036/island:23753/shore:43037	promoter.LOC644189/1to5kb.ZFP82/CDS.LOC644189/5UTR.LOC644189/exon.LOC644189/3UTR.LOC644189	0.0321328	hyper
chr10	133643641	133643950	shore:25010	intergenic.NA	0.0322654	hypo
chr6	50803791	50804540	inter:6237	CDS.TFAP2B/exon.TFAP2B/intron.TFAP2B	0.0322654	hyper
chr19	10076761	10077650	shore:41775/island:23036/shore:41776	CDS.COL5A3/exon.COL5A3/intron.COL5A3	0.0322654	hyper
chr10	118891331	118894760	shore:24764/island:13523/shore:24765/island:13524/shore:24766	CDS.VAX1/exon.VAX1/intron.VAX1/3UTR.VAX1	0.032573	hyper
chr12	133483681	133486050	shore:29978/island:16391/shore:29979	promoter.NA/1to5kb.NA/exon.NA/intron.NA	0.032573	hyper
chr9	139416251	139420390	shore:22929/island:12526/shore:22930	1to5kb.MIR4673/CDS.NOTCH1/exon.NOTCH1/intron.NOTCH1	0.0326004	hyper
chr8	31496321	31498650	shore:19651/island:10732/shore:19652	promoter.NRG1/CDS.NRG1/5UTR.NRG1/exon.NRG1/intron.NRG1	0.0328058	hyper
chr10	43368291	43368610	inter:9730	intergenic.NA	0.0328809	hypo
chr19	3933271	3934020	shore:41254/island:22724/shore:41255	promoter.NMRK2/CDS.NMRK2/5UTR.NMRK2/exon.NMRK2/intron.NMRK2	0.0329797	hyper
chr21	47009441	47011390	shore:46777/island:25868/shore:46778	intergenic.NA	0.0329797	hyper
chr5	145716671	145717580	shore:13272	1to5kb.POU4F3	0.0329797	hyper
chr9	139426861	139430090	shore:22933/island:12529/shore:22934	intron.NOTCH1	0.033122	hyper
chr14	74724961	74725630	island:17400/shore:31820	intron.VSX2	0.0331519	hyper
chr8	130995121	130996500	shore:20456/island:11160/shore:20457	intron.FAM49B	0.0335625	hyper
chr13	23411911	23412940	shore:30104/island:16458/shore:30105	intergenic.NA	0.0335825	hyper
chr2	198649081	198652330	shore:6851/island:3717/shore:6852	promoter.BOLL/1to5kb.BOLL/CDS.BOLL/5UTR.BOLL/exon.BOLL/intron.BOLL	0.0335987	hyper
chr18	37861141	37861800	inter:16176	intergenic.NA	0.0336923	hypo
chr6	10384671	10386260	shore:14074/island:7670/shore:14075	intergenic.NA	0.0337888	hyper
chr19	18455171	18456290	shelf:35976/inter:16937	intron.PGPEP1	0.0338477	hyper
chr6	34111771	34113600	island:8004	intron.GRM4	0.0338828	hyper
chr5	100238481	100239450	shore:12657/island:6883/shore:12658	promoter.ST8SIA4/CDS.ST8SIA4/5UTR.ST8SIA4/exon.ST8SIA4/intron.ST8SIA4	0.0339134	hyper
chr12	103695711	103696650	shore:29091/island:15893/shore:29092	CDS.C12orf42/exon.C12orf42/intron.C12orf42/3UTR.C12orf42	0.0339348	hyper
chr8	686531	690290	shore:19083/island:10423/shore:19084	promoter.NA/1to5kb.NA/5UTR.NA/exon.NA/intron.NA	0.034193	hyper
chr14	104769931	104771260	inter:13257	intergenic.NA	0.0342905	hypo
chr21	39287761	39289200	shore:46452/island:25689	promoter.KCNJ6/1to5kb.KCNJ6/5UTR.KCNJ6/exon.KCNJ6/intron.KCNJ6	0.0342905	hyper
chr2	132182001	132183390	shore:6346/island:3434/shore:6347	intergenic.NA	0.0343115	hyper
chr17	28562091	28562930	shore:37577/island:20597	5UTR.SLC6A4/exon.SLC6A4/intron.SLC6A4	0.0343885	hyper
chr21	28215821	28219320	shore:46302/island:25610/shore:46303/island:25611/shore:46304	promoter.ADAMTS1/1to5kb.ADAMTS1/CDS.ADAMTS1/5UTR.ADAMTS1/exon.ADAMTS1/intron.ADAMTS1	0.0343885	hyper
chr18	7566411	7569100	shore:39654/island:21754/shore:39655	promoter.PTPRM/CDS.PTPRM/5UTR.PTPRM/exon.PTPRM/intron.PTPRM	0.0346229	hyper
chr16	82660161	82661960	shore:36093/island:19759/shore:36094	promoter.CDH13/CDS.CDH13/5UTR.CDH13/exon.CDH13/intron.CDH13	0.0346229	hyper
chr12	103344191	103345360	shore:29084/island:15889/shore:29085	intergenic.NA	0.0346491	hyper
chr1	46913471	46914780	shore:1932/island:1061/shore:1933	intergenic.NA	0.0346614	hyper
chr1	18436371	18437870	shore:958/island:550/shore:959	intron.IGSF21	0.0349559	hyper
chr6	94125991	94127760	shore:15303/island:8334	intron.EPHA7	0.0349559	hyper
chr12	122244781	122245380	shore:29504	1to5kb.LINC01089/intron.SETD1B	0.034966	hyper
chr4	135397721	135398280	inter:4707	intergenic.NA	0.0350124	hypo
chr8	41424121	41425620	shore:19727/island:10772/shore:19728	intergenic.NA	0.0351819	hyper
chr15	20485541	20486100	inter:13324	1to5kb.CHEK2P2	0.0351975	hypo
chr15	26431111	26431520	inter:13370	intergenic.NA	0.0353334	hypo
chr4	41258481	41259550	shore:10587/island:5746	promoter.UCHL1/promoter.UCHL1-AS1/CDS.UCHL1/5UTR.UCHL1/exon.UCHL1/exon.UCHL1-AS1/intron.UCHL1/intron.UCHL1-AS1	0.0353724	hyper
chr19	5048431	5049760	island:22810/shore:41398	intron.KDM4B	0.0354294	hyper
chr13	95654451	95655850	shore:30622/island:16740/shore:30623	intergenic.NA	0.0354803	hyper
chr8	12342311	12342890	inter:7963	intron.LOC100506990	0.0355822	hypo
chr20	62582041	62583050	inter:18265/shelf:38874	promoter.UCKL1/1to5kb.UCKL1-AS1/CDS.UCKL1/5UTR.UCKL1/exon.UCKL1/intron.UCKL1	0.0356935	hyper
chr13	79160721	79162190	inter:12547	intron.RNF219-AS1	0.0357387	hyper
chr5	119800821	119801730	shore:12763/island:6938/shore:12764	intron.PRR16	0.0358123	hyper
chr18	43913181	43915440	shore:39987/island:21925/shore:39988	promoter.RNF165/promoter.NA/1to5kb.RNF165/1to5kb.NA/CDS.RNF165/5UTR.RNF165/exon.RNF165/exon.NA/intron.RNF165	0.0359604	hyper
chr21	45769551	45771370	inter:18467	promoter.TRPM2/1to5kb.TRPM2/5UTR.TRPM2/exon.TRPM2/intron.TRPM2	0.0359979	hyper
chr2	80529041	80532100	shore:5592/island:3030/shore:5593/island:3031/shore:5594	promoter.CTNNA2/promoter.LRRTM1/promoter.NA/1to5kb.CTNNA2/1to5kb.NA/CDS.LRRTM1/CDS.NA/5UTR.LRRTM1/exon.LRRTM1/exon.NA/intron.CTNNA2/intron.LRRTM1/3UTR.LRRTM1	0.0363259	hyper
chr13	50193651	50194760	inter:12493	intergenic.NA	0.0364166	hypo
chr20	62679121	62680710	shore:46173/island:25539	CDS.SOX18/exon.SOX18/intron.SOX18/3UTR.SOX18	0.0364166	hyper
chr7	37486701	37489180	shore:17162/island:9382/shore:17163	promoter.ELMO1/5UTR.ELMO1/exon.ELMO1/intron.ELMO1	0.0364166	hyper
chr16	17361021	17361720	inter:14209	intron.XYLT1	0.0364166	hyper
chr5	38257551	38259410	shore:12162/island:6615/shore:12163	promoter.EGFLAM/CDS.EGFLAM/5UTR.EGFLAM/exon.EGFLAM/intron.EGFLAM	0.0364703	hyper
chr15	47475941	47477740	shore:33050/island:18063/shore:33051	promoter.SEMA6D/5UTR.SEMA6D/exon.SEMA6D/intron.SEMA6D	0.0364703	hyper
chr10	134007341	134007760	inter:10327	intron.DPYSL4	0.0364758	hypo
chr1	36643321	36645330	shore:1591/island:883/shore:1592	CDS.MAP7D1/exon.MAP7D1/intron.MAP7D1	0.0366235	hyper
chr5	141262551	141263530	shore:13237/island:7207/shore:13238	1to5kb.PCDH1/intergenic.NA	0.0370089	hyper
chr8	104511101	104514180	island:11089/shore:20322	promoter.RIMS2/1to5kb.RIMS2/CDS.RIMS2/5UTR.RIMS2/exon.RIMS2/intron.RIMS2	0.0370391	hyper
chr2	119609141	119609790	shore:6107	1to5kb.EN1	0.0371713	hyper
chr1	70034891	70035460	shore:2251	intron.LRRC7	0.0371845	hyper
chr10	102902751	102902980	shelf:21238	intergenic.NA	0.0372305	hyper
chr6	99279991	99281790	island:8344	promoter.POU3F2/1to5kb.POU3F2	0.0372305	hyper
chr11	20184341	20185710	shore:25875/island:14162/shore:25876	1to5kb.DBX1	0.0372858	hyper
chr20	58220331	58220820	inter:18175	intron.PHACTR3	0.0373557	hypo
chr7	1408421	1409660	shore:16446/island:8970/shore:16447	intergenic.NA	0.0373557	hyper
chr15	85810781	85811240	inter:13861	intergenic.NA	0.0373557	hypo
chr18	12868731	12869340	inter:16072	intron.PTPN2	0.0373617	hyper
chr2	171676251	171677270	shore:6591/island:3565/shore:6592	intron.GAD1	0.0374742	hyper
chr2	130736941	130738040	shore:6266/island:3391/shore:6267	promoter.RAB6C/CDS.RAB6C/5UTR.RAB6C/exon.RAB6C/exon.RAB6C-AS1/intron.RAB6C-AS1	0.0374742	hyper
chr9	140200451	140202080	shelf:19923/inter:9476	1to5kb.NRARP/CDS.EXD3/exon.EXD3/intron.EXD3/3UTR.EXD3	0.0375004	hyper
chr19	7852661	7854140	shore:41633/island:22953	promoter.CLEC4GP1/exon.CLEC4GP1/intron.CLEC4GP1	0.0379336	hyper
[truncated: 158 more rows]

## Sheet: MBDE_DMRs Metastasis vs Normal
Supplementary Table 1: Differentially methylated regions (DMRs) identified with MBDE and TE in primary CRC and/or CRC liver metastases vs. normal colon mucosa. (Sheets 1 and 2 show results obtained with MBDE for primary and metastatic CRCs, respectively; Sheet 3 shows results obtained with TE for primary CRCs.) Lists are filtered for adjusted P-value or median P-value. Chromosome coordinates base…
MBDE DMRs in CRC liver metastases (versus normal colon mucosa)
Chromosome	start	end	sSISs or inter-sSISs (as in Figure 1)	Gene or extragenic (i.e. intergenic) region (as in Figure 1)	Adjusted P-Value	Direction of cancer-associated methylation change
chr14	107252771	107253560	inter:13319	intron.NA	2.41648e-09	hypo
chr11	7272521	7274540	shore:25668/island:14052/shore:25669	promoter.SYT9/CDS.SYT9/5UTR.SYT9/exon.SYT9/intron.SYT9	2.41648e-09	hyper
chr7	31375601	31376810	shore:17103/island:9351/shore:17104	intergenic.NA	2.41648e-09	hyper
chr6	133561441	133564350	shore:15634/island:8517/shore:15635/island:8518/shore:15636	promoter.EYA4/1to5kb.EYA4/5UTR.EYA4/exon.EYA4/intron.EYA4	2.41648e-09	hyper
chr7	54609421	54610530	shore:17342/island:9477/shore:17343	promoter.VSTM2A/CDS.VSTM2A/5UTR.VSTM2A/exon.VSTM2A/intron.VSTM2A	5.87525e-09	hyper
chr2	172944671	172946810	shore:6614/island:3577/shore:6615/island:3578/shore:6616	1to5kb.DLX1/CDS.METAP1D/exon.METAP1D/intron.METAP1D/3UTR.METAP1D	7.98397e-09	hyper
chr2	45169151	45172520	shore:5172/island:2802/shore:5173	CDS.SIX3/5UTR.SIX3/exon.SIX3/intron.SIX3/3UTR.SIX3	7.98397e-09	hyper
chr2	45154921	45157900	shore:5168/island:2798/shore:5169	intergenic.NA	8.32206e-09	hyper
chr7	4997891	4999340	shore:16678/island:9107/shore:16679	promoter.MMD2/CDS.MMD2/5UTR.MMD2/exon.MMD2/intron.MMD2	9.80615e-09	hyper
chr10	15760571	15762340	shore:23435/island:12813/shore:23436	promoter.ITGA8/CDS.ITGA8/exon.ITGA8/intron.ITGA8	9.80615e-09	hyper
chr16	49872081	49873260	shore:35536/island:19459/shore:35537	intron.ZNF423	9.80615e-09	hyper
chr7	93519091	93521190	shore:17884/island:9767/shore:17885	promoter.TFPI2/CDS.TFPI2/5UTR.TFPI2/exon.TFPI2/intron.GNGT1/intron.TFPI2	9.80615e-09	hyper
chr9	135461631	135463220	shore:22650/island:12359/shore:22651	CDS.BARHL1/exon.BARHL1/intron.BARHL1	9.80615e-09	hyper
chr7	24322781	24325380	shore:16968/island:9268/shore:16969	promoter.NPY/1to5kb.NPY/CDS.NPY/5UTR.NPY/exon.NPY/intron.NPY	9.80615e-09	hyper
chr7	35225071	35226970	shore:17137/island:9368/shore:17138	promoter.DPY19L2P1/1to5kb.DPY19L2P1/5UTR.DPY19L2P1/exon.DPY19L2P1/intron.DPY19L2P1	9.80615e-09	hyper
chr7	152621591	152623600	shore:18764/island:10240/shore:18765/island:10241/shore:18766	intergenic.NA	9.80615e-09	hyper
chr8	97169481	97174500	shore:20220/island:11034/shore:20221/island:11035/shore:20222/island:11036/shore:20223	promoter.GDF6/1to5kb.GDF6/CDS.GDF6/5UTR.GDF6/exon.GDF6/intron.GDF6	9.80615e-09	hyper
chr5	136833611	136835210	shore:12963/island:7046/shore:12964	promoter.SPOCK1/CDS.SPOCK1/5UTR.SPOCK1/exon.SPOCK1/intron.SPOCK1	9.80615e-09	hyper
chr8	68863911	68865260	shore:20002/island:10921/shore:20003	promoter.NA/promoter.PREX2/CDS.NA/CDS.PREX2/5UTR.NA/5UTR.PREX2/exon.NA/exon.PREX2/intron.PREX2/3UTR.NA	9.80615e-09	hyper
chr3	142837171	142841440	shore:9269/island:5010/shore:9270	promoter.CHST2/promoter.NA/1to5kb.CHST2/1to5kb.NA/CDS.CHST2/CDS.NA/5UTR.CHST2/exon.CHST2/exon.NA/intron.CHST2/3UTR.CHST2	9.80615e-09	hyper
chr20	34893531	34895550	shore:45349/island:25076/shore:45350	promoter.DLGAP4/5UTR.DLGAP4/exon.DLGAP4/intron.DLGAP4	9.80615e-09	hyper
chr16	51183091	51190550	shore:35565/island:19474/shore:35566/island:19475/shore:35567	promoter.SALL1/1to5kb.SALL1/CDS.SALL1/5UTR.SALL1/exon.SALL1/intron.SALL1/intergenic.NA	1.09953e-08	hyper
chr8	72755501	72758000	shore:20023/island:10932/shore:20024	promoter.MSC-AS1/promoter.MSC/1to5kb.MSC/CDS.MSC/5UTR.MSC/exon.MSC-AS1/exon.MSC/intron.MSC-AS1/intron.MSC	1.13763e-08	hyper
chr7	43151761	43154150	shore:17207/island:9405/shore:17208	promoter.HECW1/1to5kb.HECW1/1to5kb.NA/CDS.HECW1/5UTR.HECW1/exon.HECW1/intron.HECW1	1.28362e-08	hyper
chr2	54086311	54087800	shore:5249/island:2844/shore:5250	promoter.ASB3/promoter.GPR75/1to5kb.NA/CDS.ASB3/5UTR.ASB3/5UTR.GPR75/exon.ASB3/exon.GPR75/intron.ASB3/intron.GPR75	1.3577e-08	hyper
chr2	47796621	47799590	shore:5219/island:2829/shore:5220	promoter.KCNK12/1to5kb.KCNK12/CDS.KCNK12/exon.KCNK12/intron.MSH2/intron.KCNK12	1.37663e-08	hyper
chr6	73330451	73333380	shore:15153/island:8256/shore:15154	promoter.KCNQ5/1to5kb.KCNQ5/CDS.KCNQ5/5UTR.KCNQ5/exon.KCNQ5/intron.KCNQ5	1.37663e-08	hyper
chr7	28449001	28450330	island:9328/shore:17061	1to5kb.CREB5/CDS.NA/5UTR.NA/exon.NA/intron.CREB5/intron.NA/3UTR.NA	1.37663e-08	hyper
chr2	68545581	68547430	shore:5394/island:2924/shore:5395	promoter.CNRIP1/CDS.CNRIP1/5UTR.CNRIP1/exon.CNRIP1/intron.CNRIP1	1.37663e-08	hyper
chr8	67344211	67345310	shore:19976/island:10908/shore:19977	promoter.ADHFE1/1to5kb.RRS1-AS1/CDS.ADHFE1/5UTR.ADHFE1/exon.ADHFE1/intron.ADHFE1	1.39304e-08	hyper
chr9	132381651	132383590	shore:22520/island:12290/shore:22521	promoter.C9orf50/1to5kb.NTMT1/CDS.C9orf50/5UTR.C9orf50/exon.C9orf50/intron.C9orf50	1.58568e-08	hyper
chr8	97505441	97507890	shore:20226/island:11038/shore:20227	promoter.SDC2/CDS.SDC2/5UTR.SDC2/exon.SDC2/intron.SDC2	1.73791e-08	hyper
chr7	30720981	30722760	shore:17095/island:9347/shore:17096	promoter.CRHR2/CDS.CRHR2/5UTR.CRHR2/exon.CRHR2/intron.CRHR2	1.78485e-08	hyper
chr11	8289191	8291110	shore:25686/island:14061/shore:25687	promoter.LMO1/1to5kb.LMO1/CDS.LMO1/5UTR.LMO1/exon.LMO1/intron.LMO1	2.7493e-08	hyper
chr19	34111831	34114620	shore:42840/island:23638/shore:42841	promoter.CHST8/1to5kb.CHST8/5UTR.CHST8/exon.CHST8/intron.CHST8	2.94109e-08	hyper
chr6	84417251	84419710	shore:15231/island:8297/shore:15232	promoter.SNAP91/1to5kb.SNAP91/CDS.SNAP91/5UTR.SNAP91/exon.SNAP91/intron.SNAP91	2.94109e-08	hyper
chr2	139536711	139539170	shore:6421/island:3473/shore:6422	promoter.NXPH2/1to5kb.NXPH2/CDS.NXPH2/exon.NXPH2/intron.NXPH2	2.94109e-08	hyper
chr4	110222711	110224620	shore:11073/island:6005/shore:11074	promoter.COL25A1/1to5kb.COL25A1/CDS.COL25A1/5UTR.COL25A1/exon.COL25A1/intron.COL25A1	3.18243e-08	hyper
chr20	59826661	59829820	shore:45831/island:25331/shore:45832	promoter.CDH4/CDS.CDH4/5UTR.CDH4/exon.CDH4/intron.CDH4	3.18243e-08	hyper
chr8	69242491	69244900	shore:20004/island:10922/shore:20005	promoter.C8orf34/promoter.C8orf34-AS1/1to5kb.C8orf34-AS1/CDS.C8orf34/CDS.C8orf34-AS1/5UTR.C8orf34/5UTR.C8orf34-AS1/exon.C8orf34/exon.C8orf34-AS1/intron.C8orf34/intron.C8orf34-AS1	3.18243e-08	hyper
chr11	128562181	128565500	shore:27635/island:15117/shore:27636	promoter.FLI1/1to5kb.FLI1/CDS.FLI1/5UTR.FLI1/exon.FLI1/exon.SENCR/intron.FLI1/intron.SENCR	3.28934e-08	hyper
chr7	98466741	98468570	shore:17955/island:9806/shore:17956	promoter.TMEM130/1to5kb.TMEM130/CDS.TMEM130/5UTR.TMEM130/exon.TMEM130/intron.TMEM130	3.69903e-08	hyper
chr2	131720521	131722610	shore:6326/island:3423/shore:6327	intron.ARHGEF4	3.69903e-08	hyper
chr11	111410681	111412520	shore:27324/island:14954/shore:27325	promoter.LAYN/1to5kb.LAYN/CDS.LAYN/5UTR.LAYN/exon.LAYN/intron.LAYN	3.69903e-08	hyper
chr2	945151	947500	shore:4595/island:2489/shore:4596/island:2490/shore:4597	promoter.SNTG2/1to5kb.SNTG2/CDS.SNTG2/5UTR.SNTG2/exon.SNTG2/intron.SNTG2	3.69903e-08	hyper
chr7	32337621	32339090	shore:17107/island:9353/shore:17108	promoter.PDE1C/CDS.PDE1C/5UTR.PDE1C/exon.PDE1C/intron.PDE1C	3.69903e-08	hyper
chr11	18812381	18814370	shore:25860/island:14153/shore:25861	promoter.PTPN5/5UTR.PTPN5/exon.PTPN5/intron.PTPN5	4.02407e-08	hyper
chr5	1444131	1447180	shore:11883/island:6464/shore:11884/island:6465/shore:11885	promoter.SLC6A3/1to5kb.SLC6A3/5UTR.SLC6A3/exon.SLC6A3/intron.SLC6A3	4.32727e-08	hyper
chr12	66122531	66123660	shore:28842/island:15765/shore:28843	intergenic.NA	4.32727e-08	hyper
chr2	182321481	182323290	shore:6753/island:3667/shore:6754	promoter.ITGA4/CDS.ITGA4/5UTR.ITGA4/exon.ITGA4/intron.ITGA4	4.55699e-08	hyper
chr1	200009651	200011750	shore:3723/island:2023/shore:3724/island:2024/shore:3725/island:2025	promoter.NR5A2/1to5kb.NR5A2/intron.NR5A2	4.55699e-08	hyper
chr2	98962541	98964750	shore:5843/island:3163/shore:5844	promoter.CNGA3/5UTR.CNGA3/exon.CNGA3/intron.CNGA3	4.55699e-08	hyper
chr7	19155761	19159070	shore:16898/island:9231/shore:16899	promoter.TWIST1/promoter.NA/1to5kb.TWIST1/1to5kb.NA/CDS.TWIST1/CDS.NA/5UTR.TWIST1/exon.TWIST1/exon.NA/intron.TWIST1/3UTR.TWIST1	4.55699e-08	hyper
chr2	100937301	100939430	shore:5869/island:3176/shore:5870	promoter.LONRF2/CDS.LONRF2/5UTR.LONRF2/exon.LONRF2/intron.LONRF2	4.56491e-08	hyper
chr12	117796781	117799700	shore:29374/island:16050/shore:29375	promoter.NOS1/5UTR.NOS1/exon.NOS1/intron.NOS1	4.65354e-08	hyper
chr2	175594241	175595860	shore:6662/island:3607/shore:6663	exon.NA/intron.NA	4.71491e-08	hyper
chr6	41340641	41344040	shore:14847/island:8093/shore:14848	intergenic.NA	4.71491e-08	hyper
chr2	56150081	56151430	shore:5283/island:2861/shore:5284	promoter.EFEMP1/5UTR.EFEMP1/exon.EFEMP1/intron.EFEMP1	4.77662e-08	hyper
chr12	50354501	50356470	shore:28404/island:15525/shore:28405	promoter.AQP5/1to5kb.AQP6/CDS.AQP5/5UTR.AQP5/exon.AQP5/intron.AQP5	4.77662e-08	hyper
chr3	28616361	28618270	shore:7946/island:4311/shore:7947	promoter.LINC00693/promoter.NA/1to5kb.NA/exon.LINC00693/exon.NA/intron.LINC00693	4.77662e-08	hyper
chr8	55369921	55372830	shore:19863/island:10845/shore:19864	promoter.SOX17/CDS.SOX17/5UTR.SOX17/exon.SOX17/intron.SOX17/3UTR.SOX17	4.97734e-08	hyper
chr2	63282171	63285400	shore:5333/island:2890/shore:5334/island:2891/shore:5335	CDS.OTX1/exon.OTX1/intron.OTX1/3UTR.OTX1/intergenic.NA	5.10084e-08	hyper
chr7	153583111	153586560	shore:18769/island:10243/shore:18770	promoter.DPP6/1to5kb.DPP6/CDS.DPP6/5UTR.DPP6/exon.DPP6/intron.DPP6	5.35533e-08	hyper
chr17	35164711	35166330	shore:37745/island:20686/shore:37746	intergenic.NA	5.42744e-08	hyper
chr3	192231781	192233490	shore:9678/island:5226/shore:9679	intron.FGF12	5.42744e-08	hyper
chr3	129692651	129695110	shore:9074/island:4906/shore:9075	promoter.TRH/CDS.TRH/5UTR.TRH/exon.TRH/intron.TRH	5.6559e-08	hyper
chr4	96468751	96471340	shore:10996/island:5963/shore:10997/island:5964/shore:10998	promoter.UNC5C/CDS.UNC5C/5UTR.UNC5C/exon.UNC5C/intron.UNC5C	6.50059e-08	hyper
chr3	13323171	13325240	shore:7813/island:4239/shore:7814	intergenic.NA	6.51221e-08	hyper
chr8	53850961	53854680	shore:19843/island:10834/shore:19844	promoter.NPBWR1/1to5kb.NPBWR1/CDS.NPBWR1/exon.NPBWR1/intergenic.NA	6.64446e-08	hyper
chr2	105479631	105481040	shore:5910/island:3197/shore:5911	intergenic.NA	6.69757e-08	hyper
chr9	124987461	124989960	shore:22237/island:12141	promoter.LHX6/1to5kb.LHX6/CDS.LHX6/5UTR.LHX6/exon.LHX6/intron.LHX6	7.70463e-08	hyper
chr7	49811731	49816010	shore:17310/island:9460/shore:17311	promoter.VWC2/1to5kb.VWC2/CDS.VWC2/5UTR.VWC2/exon.VWC2/intron.VWC2	7.70463e-08	hyper
chr21	38078711	38083480	shore:46426/island:25676/shore:46427	CDS.SIM2/exon.SIM2/intron.SIM2/3UTR.SIM2	7.81454e-08	hyper
chr8	70981431	70985260	shore:20010/island:10925/shore:20011	promoter.PRDM14/1to5kb.PRDM14/CDS.PRDM14/5UTR.PRDM14/exon.PRDM14/intron.PRDM14	7.86656e-08	hyper
chr5	172670551	172673540	shore:13554/island:7379/shore:13555/island:7380/shore:13556	intergenic.NA	8.37134e-08	hyper
chr7	151106141	151108490	shore:18728/island:10221/shore:18729	promoter.WDR86-AS1/promoter.WDR86/1to5kb.WDR86/CDS.WDR86-AS1/CDS.WDR86/5UTR.WDR86-AS1/5UTR.WDR86/exon.WDR86-AS1/exon.WDR86/intron.WDR86-AS1/intron.WDR86	8.48083e-08	hyper
chr12	5017821	5021950	shore:27865/island:15238/shore:27866	promoter.KCNA1/promoter.NA/1to5kb.KCNA1/1to5kb.NA/CDS.KCNA1/CDS.NA/5UTR.KCNA1/exon.KCNA1/exon.NA/intron.KCNA1	8.48083e-08	hyper
chr1	165322921	165326600	shore:3458/island:1884/shore:3459/island:1885/shore:3460	promoter.LMX1A/1to5kb.LMX1A/CDS.LMX1A/5UTR.LMX1A/exon.LMX1A/intron.LMX1A	9.70156e-08	hyper
chr1	200003431	200006180	shore:3721/island:2021/shore:3722	1to5kb.NR5A2/intron.NR5A2	9.71282e-08	hyper
chr2	1745551	1749130	shore:4622/island:2503/shore:4623	promoter.PXDN/CDS.PXDN/5UTR.PXDN/exon.PXDN/intron.PXDN	9.97616e-08	hyper
chr3	134369161	134370410	shore:9143/island:4942/shore:9144	promoter.KY/CDS.KY/5UTR.KY/exon.KY/intron.KY	9.97616e-08	hyper
chr4	142052971	142054870	shore:11294/island:6131/shore:11295	promoter.RNF150/CDS.RNF150/5UTR.RNF150/exon.RNF150/intron.RNF150	9.99616e-08	hyper
chr9	137533091	137534640	shore:22771/island:12426/shore:22772	promoter.COL5A1/CDS.COL5A1/5UTR.COL5A1/exon.COL5A1/intron.COL5A1	1.0358e-07	hyper
chr7	19145661	19147990	shore:16894/island:9228/shore:16895/island:9229/shore:16896	intergenic.NA	1.04512e-07	hyper
chr9	122130671	122132520	shore:22180/island:12111/shore:22181	promoter.BRINP1/5UTR.BRINP1/exon.BRINP1/intron.BRINP1	1.07831e-07	hyper
chr11	31824881	31828230	shore:25936/island:14196/shore:25937/island:14197/shore:25938	promoter.PAX6/1to5kb.PAX6/CDS.PAX6/5UTR.PAX6/exon.PAX6/intron.PAX6	1.07831e-07	hyper
chr7	2727571	2728590	shore:16611/island:9066/shore:16612	promoter.AMZ1/5UTR.AMZ1/exon.AMZ1/intron.AMZ1	1.11022e-07	hyper
chr6	72129151	72131110	shore:15144/island:8251/shore:15145	promoter.LINC00472/exon.LINC00472/intron.LINC00472	1.22822e-07	hyper
chr19	30716091	30717960	shore:42774/island:23602	intergenic.NA	1.23149e-07	hyper
chr11	91957351	91960650	shore:27192/island:14886/shore:27193	intergenic.NA	1.23719e-07	hyper
chr8	145103091	145108610	shore:20788/island:11353/shore:20789	CDS.OPLAH/exon.OPLAH/intron.OPLAH/3UTR.OPLAH/intergenic.NA	1.36164e-07	hyper
chr2	154727571	154730200	shore:6477/island:3501/shore:6478/island:3502/shore:6479/island:3503/shore:6480	promoter.GALNT13/5UTR.GALNT13/exon.GALNT13/intron.GALNT13	1.38348e-07	hyper
chr2	45230851	45232830	shore:5179/island:2807/shore:5180/island:2808/shore:5181	exon.SIX2/3UTR.SIX2/intergenic.NA	1.5455e-07	hyper
chr7	327891	331660	shore:16251/island:8848/shore:16252	promoter.WI2-2373I1.2/1to5kb.WI2-2373I1.2/CDS.WI2-2373I1.2/exon.WI2-2373I1.2/intron.WI2-2373I1.2/intergenic.NA	1.67604e-07	hyper
chr9	37025191	37029040	shore:21325/island:11653/shore:21326/island:11654/shore:21327	promoter.PAX5/1to5kb.PAX5/CDS.PAX5/exon.PAX5/intron.PAX5	1.75727e-07	hyper
chr19	15089881	15091700	shore:42227/island:23294/shore:42228	promoter.SLC1A6/1to5kb.SLC1A6/5UTR.SLC1A6/exon.SLC1A6/intron.SLC1A6	1.8113e-07	hyper
chr10	23460991	23464220	shore:23503/island:12850/shore:23504/island:12851/shore:23505	intergenic.NA	1.82114e-07	hyper
chr1	44872011	44875030	island:1024/shore:1860	intron.RNF220	1.82114e-07	hyper
chr7	158936211	158938790	shore:19044/island:10401/shore:19045	promoter.VIPR2/1to5kb.VIPR2/CDS.VIPR2/5UTR.VIPR2/exon.VIPR2/intron.VIPR2	1.85305e-07	hyper
chr4	2431161	2432490	shore:10120/island:5490/shore:10121	intron.CFAP99	1.90337e-07	hypo
chr3	192125511	192128310	shore:9676/island:5225/shore:9677	promoter.FGF12/1to5kb.FGF12/CDS.FGF12/5UTR.FGF12/exon.FGF12/intron.FGF12	1.9061e-07	hyper
chr2	233350001	233353230	shore:7287/island:3953/shore:7288	promoter.ECEL1/1to5kb.ECEL1/CDS.ECEL1/5UTR.ECEL1/exon.ECEL1/intron.ECEL1	1.92587e-07	hyper
chr10	57389581	57391540	shore:23900/island:13056/shore:23901	1to5kb.PCDH15	1.95042e-07	hyper
chr1	50885911	50887560	island:1102	promoter.DMRTA2/CDS.DMRTA2/5UTR.DMRTA2/exon.DMRTA2/intron.DMRTA2	1.95042e-07	hyper
chr16	54965171	54968080	island:19490/shore:35593	promoter.IRX5/1to5kb.CRNDE/CDS.IRX5/5UTR.IRX5/exon.IRX5/intron.IRX5/3UTR.IRX5	1.97128e-07	hyper
chr7	31091451	31093390	shore:17099/island:9349/shore:17100	promoter.ADCYAP1R1/5UTR.ADCYAP1R1/exon.ADCYAP1R1/intron.ADCYAP1R1	1.97922e-07	hyper
chr6	62995261	62996680	shore:15114/island:8236/shore:15115	promoter.KHDRBS2/CDS.KHDRBS2/5UTR.KHDRBS2/exon.KHDRBS2/intron.KHDRBS2	1.97922e-07	hyper
chr7	35296651	35299140	shore:17140/island:9370/shore:17141	1to5kb.TBX20/intergenic.NA	2.00818e-07	hyper
chr16	22824351	22826750	shore:35018/island:19183/shore:35019	promoter.HS3ST2/1to5kb.HS3ST2/CDS.HS3ST2/5UTR.HS3ST2/exon.HS3ST2/intron.HS3ST2	2.03623e-07	hyper
chr20	23027851	23032460	shore:45114/island:24948/shore:45115	promoter.THBD/promoter.NA/1to5kb.THBD/1to5kb.NA/CDS.THBD/CDS.NA/5UTR.THBD/5UTR.NA/exon.THBD/exon.NA/intron.NA/3UTR.THBD	2.03623e-07	hyper
chr21	38067891	38070740	shore:46424/island:25674	1to5kb.SIM2	2.03623e-07	hyper
chr3	33259491	33261060	shore:7982/island:4330/shore:7983	promoter.SUSD5/CDS.SUSD5/5UTR.SUSD5/exon.SUSD5/intron.SUSD5	2.04553e-07	hyper
chr10	7449081	7455540	shore:23346/island:12765/shore:23347	promoter.SFMBT2/1to5kb.SFMBT2/5UTR.SFMBT2/exon.SFMBT2/intron.SFMBT2	2.31461e-07	hyper
chr20	55499301	55501410	shore:45731/island:25277/shore:45732	intergenic.NA	2.34362e-07	hyper
chr10	108923531	108925100	shore:24672/island:13477/shore:24673	promoter.SORCS1/CDS.SORCS1/5UTR.SORCS1/exon.SORCS1/intron.SORCS1	2.42117e-07	hyper
chr7	38670101	38671990	shore:17171/island:9387/shore:17172	promoter.AMPH/CDS.AMPH/5UTR.AMPH/exon.AMPH/intron.AMPH	2.42117e-07	hyper
chr16	55688921	55691210	shore:35608/island:19500/shore:35609	promoter.SLC6A2/1to5kb.SLC6A2/CDS.SLC6A2/5UTR.SLC6A2/exon.SLC6A2/intron.SLC6A2	2.42117e-07	hyper
chr1	54203151	54204800	shore:2077/island:1140	1to5kb.GLIS1	2.42117e-07	hyper
chr17	37380651	37382470	shore:37837/island:20738/shore:37838	promoter.STAC2/CDS.STAC2/5UTR.STAC2/exon.STAC2/intron.STAC2	2.4656e-07	hyper
chr9	969281	973860	shore:20949/island:11452/shore:20950	1to5kb.DMRT3/intergenic.NA	2.47442e-07	hyper
chr21	38076391	38078550	shore:46425/island:25675/shore:46426	intron.SIM2	2.47775e-07	hyper
chr12	113900561	113902640	shore:29306/island:16007	CDS.LHX5/exon.LHX5/intron.LHX5/3UTR.LHX5/intergenic.NA	2.48227e-07	hyper
chr2	105458811	105462080	shore:5905/island:3194/shore:5906	intron.PANTR1	2.48227e-07	hyper
chr3	48697341	48700380	shore:8257/island:4475	promoter.CELSR3/CDS.CELSR3/5UTR.CELSR3/exon.CELSR3/intron.CELSR3	2.48227e-07	hyper
chr7	157480931	157487000	island:10332/shore:18921	intron.PTPRN2	2.58209e-07	hyper
chr10	134755391	134757160	shore:25118/island:13721/shore:25119	promoter.CFAP46/1to5kb.CFAP46/CDS.CFAP46/5UTR.CFAP46/exon.CFAP46/intron.CFAP46	2.72131e-07	hyper
chr8	54788971	54790910	shore:19853/island:10839/shore:19854	1to5kb.RGS20/intron.RGS20	2.74148e-07	hyper
chr1	179711371	179714310	shore:3606/island:1960/shore:3607	promoter.FAM163A/5UTR.FAM163A/exon.FAM163A/intron.FAM163A	2.74148e-07	hyper
chr19	1464411	1468780	shore:40801/island:22430	CDS.APC2/exon.APC2/intron.APC2/intron.C19orf25	2.74148e-07	hyper
chr4	11652241	11652640	inter:4349	intergenic.NA	3.41711e-07	hypo
chr13	110958551	110961330	shore:30737/island:16802/shore:30738/island:16803/shore:30739	promoter.COL4A2/promoter.COL4A1/1to5kb.COL4A2/1to5kb.COL4A1/CDS.COL4A2/CDS.COL4A1/5UTR.COL4A2/5UTR.COL4A1/exon.COL4A2/exon.COL4A1/intron.COL4A2/intron.COL4A1	3.41711e-07	hyper
chr2	45395721	45398490	shore:5184/island:2811/shore:5185	intergenic.NA	3.41711e-07	hyper
chr6	27533701	27534620	inter:5954	intergenic.NA	3.41711e-07	hyper
chr10	125425171	125426910	shore:24869/island:13582/shore:24870	promoter.GPR26/CDS.GPR26/5UTR.GPR26/exon.GPR26/intron.GPR26	3.49099e-07	hyper
chr2	233283661	233287350	island:3951/shore:7284	intergenic.NA	3.51625e-07	hyper
chr5	178015851	178018200	shore:13746/island:7483/shore:13747	promoter.COL23A1/CDS.COL23A1/5UTR.COL23A1/exon.COL23A1/intron.COL23A1	3.8629e-07	hyper
chr1	14924401	14926350	shore:800/island:465/shore:801	promoter.KAZN/CDS.KAZN/5UTR.KAZN/exon.KAZN/intron.KAZN	3.96379e-07	hyper
chr1	11539641	11540870	island:430/shore:735	intron.DISP3	4.0702e-07	hyper
chr7	23286931	23287890	shore:16946/island:9256/shore:16947	intron.GPNMB	4.0702e-07	hyper
chr7	32109631	32111250	shore:17105/island:9352/shore:17106	promoter.PDE1C/CDS.PDE1C/5UTR.PDE1C/exon.PDE1C/intron.PDE1C	4.26724e-07	hyper
chr7	1285771	1287830	shore:16431/island:8962/shore:16432	intergenic.NA	4.26724e-07	hyper
chr5	76505701	76507480	shore:12490/island:6792/shore:12491	promoter.PDE8B/1to5kb.PDE8B/CDS.PDE8B/5UTR.PDE8B/exon.PDE8B/intron.PDE8B	4.37719e-07	hyper
chr1	231296281	231300040	shore:4314/island:2341/shore:4315/island:2342/shore:4316	promoter.TRIM67/1to5kb.TRIM67/CDS.TRIM67/5UTR.TRIM67/exon.TRIM67/intron.TRIM67	4.41359e-07	hyper
chr11	44337271	44338720	shore:26043/island:14258	intergenic.NA	4.50452e-07	hyper
chr12	99287911	99289670	shore:29045/island:15869/shore:29046	promoter.ANKS1B/5UTR.ANKS1B/exon.ANKS1B/intron.ANKS1B	4.58706e-07	hyper
chr2	31360021	31361950	shore:5041/island:2731/shore:5042	promoter.GALNT14/CDS.GALNT14/5UTR.GALNT14/exon.GALNT14/intron.GALNT14	4.58706e-07	hyper
chr8	55378611	55380480	shore:19865/island:10846/shore:19866	intergenic.NA	4.58706e-07	hyper
chr1	114694681	114698000	shore:2683/island:1459/shore:2684/island:1460/shore:2685	promoter.SYT6/1to5kb.SYT6/5UTR.SYT6/exon.SYT6/intron.SYT6	4.63236e-07	hyper
chr4	174458881	174460290	shore:11521/island:6253/shore:11522	exon.HAND2-AS1/intron.HAND2-AS1	4.63236e-07	hyper
chr4	156679801	156681680	shore:11421/island:6199/shore:11422	promoter.GUCY1B1/CDS.GUCY1B1/5UTR.GUCY1B1/exon.GUCY1B1/intron.GUCY1B1	4.67043e-07	hyper
chr4	62065561	62069110	shore:10755/island:5837/shore:10756	promoter.ADGRL3/1to5kb.ADGRL3/5UTR.ADGRL3/exon.ADGRL3/intron.ADGRL3	4.72051e-07	hyper
chr7	127668651	127673470	shelf:15876/shore:18331/island:10005/shore:18332	promoter.LRRC4/promoter.NA/1to5kb.LRRC4/1to5kb.NA/CDS.LRRC4/CDS.NA/5UTR.LRRC4/exon.LRRC4/exon.NA/intron.SND1/intron.LRRC4/3UTR.LRRC4	4.91389e-07	hyper
chr11	20690281	20693010	shore:25884/island:14167/shore:25885	promoter.NELL1/CDS.NELL1/5UTR.NELL1/exon.NELL1/intron.NELL1	5.07375e-07	hyper
chr9	116421	118870	shore:20935/island:11445/shore:20936	promoter.FOXD4/CDS.FOXD4/5UTR.FOXD4/exon.FOXD4/3UTR.FOXD4	5.07375e-07	hyper
chr17	56234001	56235250	shore:38541/island:21128/shore:38542	promoter.MSX2P1/exon.MSX2P1	5.07375e-07	hyper
chr4	111552771	111555810	shore:11100/island:6021/shore:11101/island:6022/shore:11102	CDS.PITX2/5UTR.PITX2/exon.PITX2/intron.PITX2	5.07375e-07	hyper
chr1	208132011	208133450	shore:3925/island:2127/shore:3926	intergenic.NA	5.07375e-07	hyper
chr2	38300441	38303510	shore:5093/island:2758	promoter.CYP1B1/CDS.CYP1B1/5UTR.CYP1B1/exon.CYP1B1/intron.CYP1B1	5.07375e-07	hyper
chr7	22589081	22590170	shore:16930/island:9248/shore:16931	intergenic.NA	5.10987e-07	hyper
chr6	84562531	84564160	shore:15233/island:8298/shore:15234	promoter.RIPPLY2/CDS.RIPPLY2/5UTR.RIPPLY2/exon.RIPPLY2/intron.RIPPLY2	5.11402e-07	hyper
chr1	99469301	99471210	shore:2484/island:1356/shore:2485	promoter.LOC100129620/promoter.PLPPR5/CDS.PLPPR5/5UTR.PLPPR5/exon.LOC100129620/exon.PLPPR5/intron.LOC100129620/intron.PLPPR5	5.26239e-07	hyper
chr10	83633551	83636040	shore:24201/island:13211/shore:24202	promoter.NRG3/1to5kb.NRG3/CDS.NRG3/5UTR.NRG3/exon.NRG3/intron.NRG3	5.34067e-07	hyper
chr8	77592931	77595710	shore:20061/island:10952/shore:20062	promoter.ZFHX4/promoter.ZFHX4-AS1/5UTR.ZFHX4/exon.ZFHX4/exon.ZFHX4-AS1/intron.ZFHX4/intron.ZFHX4-AS1	5.64925e-07	hyper
chr1	234040001	234041990	shore:4343/island:2356/shore:4344	promoter.SLC35F3/CDS.SLC35F3/5UTR.SLC35F3/exon.SLC35F3/intron.SLC35F3	6.18608e-07	hyper
chr4	20253231	20257160	shore:10469/island:5683/shore:10470	promoter.SLIT2/1to5kb.SLIT2/CDS.SLIT2/5UTR.SLIT2/exon.SLIT2/intron.SLIT2	6.25225e-07	hyper
chr17	72352601	72354170	shore:38811/island:21277/shore:38812	CDS.BTBD17/exon.BTBD17/intron.BTBD17/3UTR.BTBD17	6.48371e-07	hyper
chr2	239754821	239758690	shore:7428/island:4027/shore:7429	promoter.TWIST2/1to5kb.TWIST2/CDS.TWIST2/5UTR.TWIST2/exon.TWIST2/intron.TWIST2/3UTR.TWIST2	6.49095e-07	hyper
chr11	17740221	17743980	shore:25821/island:14133/shore:25822	promoter.MYOD1/CDS.MYOD1/5UTR.MYOD1/exon.MYOD1/intron.MYOD1/3UTR.MYOD1/intergenic.NA	6.55666e-07	hyper
chr10	94833921	94835580	island:13277/shore:24323	CDS.CYP26A1/5UTR.CYP26A1/exon.CYP26A1/intron.CYP26A1	6.7042e-07	hyper
chr13	113760831	113765940	shore:30927/island:16911/shore:30928	CDS.F7/exon.F7/intron.F7	6.80365e-07	hyper
chr8	55365451	55368430	shore:19862/island:10844/shore:19863	1to5kb.SOX17/intergenic.NA	6.92158e-07	hyper
chr7	157474741	157479260	shelf:16371/shore:18920/island:10332	CDS.PTPRN2/exon.PTPRN2/intron.PTPRN2	7.08434e-07	hyper
chr1	98510011	98512110	shore:2478/island:1353/shore:2479	promoter.MIR137HG/promoter.MIR2682/promoter.MIR137/1to5kb.MIR2682/exon.MIR137HG/exon.MIR2682/exon.MIR137/intron.MIR137HG	7.14127e-07	hyper
chr3	179754161	179755570	shore:9505/island:5135/shore:9506	promoter.PEX5L/CDS.PEX5L/5UTR.PEX5L/exon.PEX5L/intron.PEX5L	7.14347e-07	hyper
chr9	133534271	133540750	shore:22570/island:12317	promoter.PRDM12/1to5kb.PRDM12/CDS.PRDM12/5UTR.PRDM12/exon.PRDM12/intron.PRDM12/intergenic.NA	7.21332e-07	hyper
chr10	22540981	22543030	island:12840/shore:23486	promoter.LOC100130992/CDS.LOC100130992/5UTR.LOC100130992/exon.LOC100130992/3UTR.LOC100130992	7.23122e-07	hyper
chr5	178770441	178773060	shore:13780/island:7502/shore:13781	promoter.ADAMTS2/CDS.ADAMTS2/5UTR.ADAMTS2/exon.ADAMTS2/intron.ADAMTS2	7.53029e-07	hyper
chr17	32905741	32909430	shore:37657/island:20638/shore:37658/island:20639/shore:37659	promoter.TMEM132E/promoter.C17orf102/1to5kb.TMEM132E/1to5kb.C17orf102/CDS.TMEM132E/CDS.C17orf102/5UTR.TMEM132E/5UTR.C17orf102/exon.TMEM132E/exon.C17orf102/intron.TMEM132E/intron.C17orf102	7.59366e-07	hyper
chr3	169540051	169540740	inter:3985	CDS.LRRIQ4/exon.LRRIQ4/intron.LRRIQ4	7.74023e-07	hypo
chr10	7708201	7710210	inter:9584	promoter.ITIH5/1to5kb.ITIH5/CDS.ITIH5/5UTR.ITIH5/exon.ITIH5/intron.ITIH5	7.74048e-07	hyper
chr6	41605611	41607640	island:8103/shore:14867/island:8104/shore:14868	promoter.MDFI/CDS.MDFI/5UTR.MDFI/exon.MDFI/intron.MDFI	7.76322e-07	hyper
chr8	55382291	55383480	shore:19866/island:10847/shore:19867	intergenic.NA	7.90742e-07	hyper
chr17	62773761	62776360	shore:38698/island:21215	CDS.ARHGAP27P1/exon.ARHGAP27P1/exon.PLEKHM1P1/intron.ARHGAP27P1/intron.PLEKHM1P1/3UTR.ARHGAP27P1	8.21722e-07	hyper
chr9	19787931	19789600	shore:21100/island:11532/shore:21101	promoter.SLC24A2/promoter.NA/1to5kb.SLC24A2/1to5kb.NA/exon.NA/intron.NA	8.21722e-07	hyper
chr5	16178781	16180970	shore:12066/island:6565/shore:12067	promoter.NA/promoter.MARCH11/1to5kb.NA/1to5kb.MARCH11/CDS.MARCH11/5UTR.MARCH11/exon.NA/exon.MARCH11/intron.NA/intron.MARCH11	8.27013e-07	hyper
chr4	42152471	42155270	shore:10614/island:5763/shore:10615	promoter.BEND4/CDS.BEND4/5UTR.BEND4/exon.BEND4/intron.BEND4	8.36746e-07	hyper
chr3	32858081	32861910	shore:7974/island:4325/shore:7975/island:4326/shore:7976	promoter.TRIM71/1to5kb.TRIM71/CDS.TRIM71/5UTR.TRIM71/exon.TRIM71/intron.TRIM71	8.4615e-07	hyper
chr1	147532181	147534200	shore:2901/island:1579/shore:2902/island:1580/shore:2903	intergenic.NA	8.4615e-07	hyper
chr4	111549621	111552670	shore:11099/island:6020/shore:11100	intron.PITX2	8.46739e-07	hyper
chr15	83775601	83777430	shore:33702/island:18404/shore:33703	promoter.TM6SF1/CDS.TM6SF1/5UTR.TM6SF1/exon.TM6SF1/intron.TM6SF1	8.48144e-07	hyper
chr10	101088631	101090910	shore:24424/island:13329/shore:24425	promoter.CNNM1/CDS.CNNM1/5UTR.CNNM1/exon.CNNM1/intron.CNNM1	8.49063e-07	hyper
chr20	61635911	61640160	shore:45987/island:25422/shore:45988	promoter.LINC01749/promoter.BHLHE23/1to5kb.LINC01749/1to5kb.BHLHE23/CDS.BHLHE23/5UTR.BHLHE23/exon.BHLHE23/3UTR.BHLHE23	8.77039e-07	hyper
chr7	55256001	55256740	inter:7145	promoter.EGFR-AS1/exon.EGFR-AS1/intron.EGFR/intron.EGFR-AS1	9.31134e-07	hyper
chr7	137530851	137532820	shore:18473/island:10081/shore:18474	promoter.DGKI/1to5kb.DGKI/CDS.DGKI/5UTR.DGKI/exon.DGKI/intron.DGKI	9.44735e-07	hyper
chr2	30142291	30144880	shore:5033/island:2727/shore:5034	promoter.ALK/CDS.ALK/5UTR.ALK/exon.ALK/intron.ALK	9.44735e-07	hyper
chr11	2160741	2162790	island:13976/shore:25525	promoter.IGF2-AS/promoter.IGF2/1to5kb.IGF2-AS/1to5kb.INS-IGF2/1to5kb.IGF2/CDS.IGF2-AS/CDS.IGF2/5UTR.IGF2-AS/5UTR.IGF2/exon.IGF2-AS/exon.IGF2/intron.IGF2-AS/intron.IGF2/intron.INS-IGF2	9.64498e-07	hyper
chr1	47898121	47900650	shore:1966/island:1079/shore:1967/island:1080/shore:1968	promoter.FOXD2-AS1/1to5kb.FOXD2/exon.FOXD2-AS1	9.74825e-07	hyper
chr6	99295181	99296940	shore:15326/island:8348/shore:15327	intergenic.NA	9.88756e-07	hyper
chr4	154680291	154681620	shore:11393/island:6183/shore:11394	promoter.RNF175/CDS.RNF175/5UTR.RNF175/exon.RNF175/intron.RNF175	1.00858e-06	hyper
chr13	37247391	37249670	shore:30314/island:16572/shore:30315	promoter.SERTM1/5UTR.SERTM1/exon.SERTM1/intron.SERTM1	1.01212e-06	hyper
chr10	131760911	131772040	shore:24974/island:13638/shore:24975	promoter.EBF3/1to5kb.EBF3/CDS.EBF3/5UTR.EBF3/exon.EBF3/intron.EBF3/3UTR.EBF3/intergenic.NA	1.02053e-06	hyper
chr2	119913921	119917440	shore:6113/island:3308/shore:6114	promoter.C1QL2/CDS.C1QL2/5UTR.C1QL2/exon.C1QL2/intron.C1QL2/3UTR.C1QL2	1.02851e-06	hyper
chr3	58572131	58573190	shore:8534/island:4626/shore:8535	promoter.FAM107A/CDS.FAM107A/5UTR.FAM107A/exon.FAM107A/intron.FAM107A	1.04291e-06	hyper
chr1	49241781	49243030	shore:1991/island:1093/shore:1992	promoter.BEND5/CDS.BEND5/5UTR.BEND5/exon.BEND5/intron.AGBL4/intron.BEND5	1.07522e-06	hyper
chr22	48884621	48887680	shore:47993/island:26513/shore:47994	promoter.FAM19A5/CDS.FAM19A5/5UTR.FAM19A5/exon.FAM19A5/intron.FAM19A5	1.0904e-06	hyper
chr8	97156431	97158390	shore:20218/island:11033/shore:20219	CDS.GDF6/exon.GDF6/intron.GDF6/3UTR.GDF6	1.09259e-06	hyper
chr7	155241041	155244540	shore:18800/island:10260/shore:18801/island:10261/shore:18802	intergenic.NA	1.12058e-06	hyper
chr1	151341321	151342720	inter:1227	CDS.SELENBP1/5UTR.SELENBP1/exon.SELENBP1/intron.SELENBP1	1.13333e-06	hyper
chr7	27140481	27144000	shelf:14709/shore:17004/island:9288/shore:17005	promoter.HOXA2/promoter.NA/1to5kb.HOXA1/1to5kb.NA/1to5kb.HOXA2/CDS.HOXA2/CDS.NA/5UTR.HOXA2/5UTR.NA/exon.HOXA2/exon.NA/intron.HOXA2/3UTR.NA	1.14334e-06	hyper
chr11	20617641	20620260	shore:25881/island:14165/shore:25882	promoter.SLC6A5/1to5kb.SLC6A5	1.15065e-06	hyper
chr6	390381	394130	shore:13910/island:7575/shore:13911	promoter.IRF4/1to5kb.IRF4/CDS.IRF4/5UTR.IRF4/exon.IRF4/intron.IRF4	1.18163e-06	hyper
chr7	103968501	103970290	shore:18188/island:9930/shore:18189	promoter.LHFPL3/promoter.NA/1to5kb.NA/CDS.LHFPL3/5UTR.LHFPL3/exon.LHFPL3/exon.NA/intron.LHFPL3	1.21441e-06	hyper
chr7	96635701	96637230	island:9783/shore:17915	1to5kb.DLX6-AS1/CDS.DLX6/exon.DLX6/intron.DLX6/intron.DLX6-AS1	1.21441e-06	hyper
chr6	100911411	100913620	shore:15365/island:8373/shore:15366	promoter.SIM1/1to5kb.SIM1/5UTR.SIM1/exon.SIM1/intron.SIM1	1.21441e-06	hyper
chr1	47908921	47912310	shore:1970/island:1082/shore:1971	intergenic.NA	1.21441e-06	hyper
chr10	23982141	23985280	shore:23512/island:12856/shore:23513/island:12857/shore:23514	promoter.KIAA1217/1to5kb.KIAA1217/5UTR.KIAA1217/exon.KIAA1217/intron.KIAA1217	1.21441e-06	hyper
chr14	57260611	57262400	shore:31541/island:17255/shore:31542	intergenic.NA	1.2176e-06	hyper
chr13	25743661	25746410	shore:30166/island:16489/shore:30167	promoter.AMER2/CDS.AMER2/5UTR.AMER2/exon.AMER2/intron.AMER2/3UTR.AMER2	1.2176e-06	hyper
chr4	157996871	157998010	shore:11427/island:6202/shore:11428	promoter.GLRB/5UTR.GLRB/exon.GLRB/intron.GLRB	1.23907e-06	hyper
chr4	144620491	144622500	shore:11311/island:6140/shore:11312	promoter.FREM3/CDS.FREM3/exon.FREM3	1.2555e-06	hyper
chr2	87015721	87018490	shore:5659/island:3065/shore:5660	CDS.CD8A/5UTR.CD8A/exon.CD8A/intron.RMND5A/intron.CD8A	1.36514e-06	hyper
chr1	170628731	170631680	shore:3530/island:1921/shore:3531	1to5kb.PRRX1	1.37985e-06	hyper
chr1	217312561	217314300	shore:4038/shelf:3501	1to5kb.ESRRG	1.37985e-06	hyper
chr1	37498131	37501140	shore:1609/island:892/shore:1610	promoter.GRIK3/1to5kb.GRIK3/CDS.GRIK3/5UTR.GRIK3/exon.GRIK3/intron.GRIK3	1.38261e-06	hyper
chr12	72665091	72668300	shore:28898/island:15793/shore:28899	promoter.TRHDE/promoter.TRHDE-AS1/promoter.NA/1to5kb.TRHDE/1to5kb.TRHDE-AS1/1to5kb.NA/CDS.TRHDE/CDS.TRHDE-AS1/5UTR.TRHDE/5UTR.TRHDE-AS1/exon.TRHDE/exon.TRHDE-AS1/exon.NA/intron.TRHDE/intron.TRHDE-AS1/3UTR.TRHDE-AS1	1.40353e-06	hyper
chr10	125731891	125733140	shore:24875/island:13585/shore:24876	intergenic.NA	1.51085e-06	hyper
chr5	1929961	1932230	shore:11936/island:6496/shore:11937	intergenic.NA	1.51085e-06	hyper
chr2	119610071	119617100	shore:6107/island:3304/shore:6108/island:3305/shore:6109/island:3306/shore:6110	1to5kb.EN1/intergenic.NA	1.52888e-06	hyper
chr5	1874981	1880230	island:6493/shore:11933/island:6494/shore:11934	CDS.IRX4/5UTR.IRX4/exon.IRX4/intron.IRX4/3UTR.IRX4/intergenic.NA	1.53065e-06	hyper
chr13	28500471	28504070	shore:30208/island:16513/shore:30209/island:16514/shore:30210/island:16515/shore:30211	intergenic.NA	1.53065e-06	hyper
chr20	55199961	55203400	shore:45729/island:25276	promoter.TFAP2C/1to5kb.TFAP2C	1.54798e-06	hyper
chr8	116679411	116680540	shore:20366/island:11112/shore:20367	promoter.TRPS1/CDS.TRPS1/5UTR.TRPS1/exon.TRPS1/intron.TRPS1	1.57749e-06	hyper
chr7	27145781	27148730	shore:17005/island:9289/shore:17006/island:9290/shore:17007	1to5kb.HOXA2/1to5kb.NA/CDS.HOXA3/exon.HOXA3/intron.HOXA3/3UTR.HOXA3	1.59788e-06	hyper
chr1	145990431	145992420	shore:2855/island:1551/shore:2856/island:1552/shore:2857	intron.NBPF20/intron.NBPF10	1.60819e-06	hyper
chr8	132051391	132055150	shore:20464/island:11164/shore:20465	promoter.ADCY8/1to5kb.ADCY8/CDS.ADCY8/5UTR.ADCY8/exon.ADCY8/intron.ADCY8	1.60819e-06	hyper
chr20	41816921	41819500	shore:45457/island:25133/shore:45458	promoter.PTPRT/CDS.PTPRT/5UTR.PTPRT/exon.PTPRT/intron.PTPRT	1.60819e-06	hyper
chr17	77720821	77722780	shore:39108/island:21431/shore:39109	intergenic.NA	1.6281e-06	hyper
chr4	85402071	85405580	shore:10934/island:5930/shore:10935/island:5931/shore:10936/island:5932/shore:10937	intergenic.NA	1.65895e-06	hyper
chr9	100609851	100611830	shore:21938/island:11978/shore:21939	1to5kb.FOXE1/intergenic.NA	1.67545e-06	hyper
chr7	96649871	96652460	shore:17917/island:9785/shore:17918/island:9786/shore:17919	CDS.DLX5/exon.DLX5/intron.DLX5/3UTR.DLX5	1.72255e-06	hyper
chr6	50787021	50788620	shore:15044/island:8198/shore:15045	intron.TFAP2B	1.74086e-06	hyper
chr9	841111	843690	shore:20947/island:11451/shore:20948	promoter.DMRT1/CDS.DMRT1/5UTR.DMRT1/exon.DMRT1/intron.DMRT1	1.74086e-06	hyper
chr16	4000351	4000830	inter:14109	intergenic.NA	1.76349e-06	hypo
chr4	155663181	155666620	shore:11410/island:6193/shore:11411/island:6194/shore:11412	promoter.LRAT/1to5kb.LRAT/CDS.LRAT/5UTR.LRAT/exon.LRAT/intron.NA/intron.LRAT	1.76349e-06	hyper
chr11	8283841	8285310	shore:25684/island:14060/shore:25685	CDS.LMO1/5UTR.LMO1/exon.LMO1/intron.LMO1	1.76364e-06	hyper
chr2	120280851	120282650	shore:6126/island:3315/shore:6127	promoter.SCTR/CDS.SCTR/5UTR.SCTR/exon.SCTR/intron.SCTR	1.76364e-06	hyper
chr6	166579631	166583780	shore:15991/island:8703/shore:15992	promoter.TBXT/1to5kb.TBXT/CDS.TBXT/5UTR.TBXT/exon.TBXT/intron.TBXT	1.78766e-06	hyper
chr4	30721731	30725120	island:5712/shore:10523	promoter.PCDH7/CDS.PCDH7/5UTR.PCDH7/exon.PCDH7	1.8127e-06	hyper
chr19	39754571	39756880	shore:43221/island:23860/shore:43222	1to5kb.IFNL2	1.8127e-06	hyper
chr7	70595951	70598670	shore:17603/island:9620/shore:17604	promoter.GALNT17/1to5kb.GALNT17/CDS.GALNT17/5UTR.GALNT17/exon.GALNT17/intron.GALNT17	1.8127e-06	hyper
chr1	224803481	224806040	shore:4123/island:2238/shore:4124/island:2239/shore:4125	promoter.CNIH3/CDS.CNIH3/5UTR.CNIH3/exon.CNIH3/intron.CNIH3	1.8191e-06	hyper
chr1	121260561	121262290	shore:2776/island:1509/shore:2777	promoter.EMBP1/exon.EMBP1/intron.EMBP1	1.84786e-06	hyper
chr16	86548751	86550740	shore:36224/island:19833/shore:36225	intergenic.NA	1.84786e-06	hyper
chr17	27938951	27941260	shore:37566/island:20591/shore:37567	CDS.ANKRD13B/exon.ANKRD13B/intron.ANKRD13B/3UTR.ANKRD13B	1.84786e-06	hyper
chr11	124738151	124739320	shore:27584/island:15090/shore:27585	CDS.ROBO3/exon.ROBO3/intron.ROBO3	1.8622e-06	hyper
chr16	25702651	25704900	shore:35067/island:19208/shore:35068	promoter.HS3ST4/CDS.HS3ST4/5UTR.HS3ST4/exon.HS3ST4/intron.HS3ST4	1.89196e-06	hyper
chr16	1338041	1338630	inter:14020	intergenic.NA	1.89196e-06	hypo
chr2	119590691	119594090	shore:6098/island:3296/shore:6099	intergenic.NA	1.92689e-06	hyper
chr20	61807531	61810930	island:25435/shore:46011	promoter.MIR124-3/1to5kb.MIR124-3/exon.MIR124-3/intergenic.NA	1.98742e-06	hyper
chr2	66808251	66810840	shore:5386/island:2920/shore:5387	intergenic.NA	2.03025e-06	hyper
chr11	503161	505260	shore:25312/island:13843/shore:25313	promoter.RNH1/1to5kb.RNH1/5UTR.RNH1/exon.RNH1/intron.RNH1	2.03025e-06	hyper
chr4	21949771	21951220	shore:10473/island:5685/shore:10474/island:5686/shore:10475	promoter.KCNIP4/CDS.KCNIP4/5UTR.KCNIP4/exon.KCNIP4/intron.KCNIP4	2.04191e-06	hyper
chr11	32447911	32450910	shore:25951/island:14206/shore:25952	CDS.WT1/exon.WT1/intron.WT1	2.08633e-06	hyper
chr3	121902311	121903940	shore:8866/island:4798/shore:8867	promoter.CASR/5UTR.CASR/exon.CASR/intron.CASR	2.08633e-06	hyper
chr19	12830071	12832490	shore:42038/island:23180/shore:42039	CDS.TNPO2/5UTR.TNPO2/exon.TNPO2/intron.TNPO2	2.10482e-06	hyper
chr20	53091521	53093440	shore:45713/island:25268/shore:45714	promoter.DOK5/CDS.DOK5/5UTR.DOK5/exon.DOK5/intron.DOK5	2.11761e-06	hyper
chr13	38442961	38444810	shore:30325/island:16578/shore:30326	promoter.TRPC4/5UTR.TRPC4/exon.TRPC4/intron.TRPC4	2.17622e-06	hyper
chr20	49638771	49640920	shore:45679/island:25251/shore:45680	promoter.KCNG1/1to5kb.KCNG1/5UTR.KCNG1/exon.KCNG1/intron.KCNG1	2.20406e-06	hyper
chr4	107955051	107957790	shore:11055/island:5995/shore:11056	promoter.DKK2/CDS.DKK2/5UTR.DKK2/exon.DKK2/intron.DKK2	2.20644e-06	hyper
chr6	10416961	10420350	shore:14087/island:7679/shore:14088/island:7680/shore:14089	promoter.TFAP2A/1to5kb.TFAP2A/CDS.TFAP2A/5UTR.TFAP2A/exon.TFAP2A/intron.TFAP2A	2.20659e-06	hyper
chr13	28495501	28499420	island:16511/shore:30207/island:16512/shore:30208	CDS.PDX1/exon.PDX1/intron.PDX1/3UTR.PDX1	2.25158e-06	hyper
chr2	66652471	66654490	shore:5377/island:2914/shore:5378	exon.MEIS1-AS3/intron.MEIS1-AS3	2.26707e-06	hyper
chr5	134362511	134365590	shore:12922/island:7022/shore:12923	1to5kb.C5orf66/CDS.PITX1/exon.PITX1/intron.PITX1/3UTR.PITX1/intergenic.NA	2.26707e-06	hyper
chr13	112757671	112762470	shore:30826/island:16852/shore:30827/island:16853/shore:30828	promoter.NA/1to5kb.NA/5UTR.NA/exon.NA	2.26707e-06	hyper
chr4	134067531	134070730	shore:11238/island:6101/shore:11239	promoter.PCDH10/promoter.NA/1to5kb.PCDH10/5UTR.PCDH10/exon.PCDH10/exon.NA/intron.NA	2.28034e-06	hyper
chr5	174158111	174160620	shore:13574/island:7390/shore:13575	intergenic.NA	2.37135e-06	hyper
chr10	8095231	8098610	island:12772/shore:23359	promoter.GATA3/promoter.GATA3-AS1/promoter.NA/1to5kb.GATA3/1to5kb.GATA3-AS1/1to5kb.NA/CDS.GATA3/5UTR.GATA3/exon.GATA3/exon.GATA3-AS1/exon.NA/intron.GATA3	2.37236e-06	hyper
chr9	100613601	100618050	shore:21939/island:11979/shore:21940/island:11980/shore:21941	promoter.FOXE1/1to5kb.FOXE1/CDS.FOXE1/5UTR.FOXE1/exon.FOXE1/3UTR.FOXE1	2.40312e-06	hyper
chr12	111470881	111473900	shore:29238/island:15971/shore:29239/island:15972/shore:29240	promoter.CUX2/CDS.CUX2/5UTR.CUX2/exon.CUX2/intron.CUX2	2.40312e-06	hyper
chr3	170302341	170304150	shore:9454/island:5108/shore:9455/island:5109/shore:9456	promoter.SLC7A14/5UTR.SLC7A14/exon.SLC7A14/intron.CLDN11/intron.NA/intron.SLC7A14	2.40312e-06	hyper
chr10	118030051	118034460	shore:24746/island:13514/shore:24747	promoter.GFRA1/1to5kb.GFRA1/CDS.GFRA1/5UTR.GFRA1/exon.GFRA1/intron.GFRA1	2.40703e-06	hyper
chr2	71016841	71018450	shore:5443/island:2949/shore:5444	promoter.FIGLA/CDS.FIGLA/5UTR.FIGLA/exon.FIGLA/intron.FIGLA	2.40703e-06	hyper
chr2	241611051	241613690	shore:7523/island:4080/shore:7524	intergenic.NA	2.40703e-06	hyper
chr6	168501611	168503250	shore:16067/island:8743/shore:16068	intergenic.NA	2.40703e-06	hyper
chr20	61048061	61052210	shore:45928/island:25386/shore:45929	promoter.GATA5/1to5kb.GATA5/CDS.GATA5/5UTR.GATA5/exon.GATA5/intron.GATA5	2.40703e-06	hyper
chr19	9517181	9518270	shore:41739/island:23017/shore:41740	intergenic.NA	2.40703e-06	hyper
chr8	85094191	85097500	shelf:17415/shore:20112/island:10979/shore:20113	promoter.RALYL/1to5kb.RALYL/CDS.RALYL/5UTR.RALYL/exon.RALYL/intron.RALYL	2.4085e-06	hyper
chr1	77332851	77335180	shore:2286/island:1250/shore:2287	promoter.ST6GALNAC5/1to5kb.ST6GALNAC5/CDS.ST6GALNAC5/5UTR.ST6GALNAC5/exon.ST6GALNAC5/intron.ST6GALNAC5	2.4085e-06	hyper
chr1	147520451	147522510	shore:2899/island:1578/shore:2900	promoter.NA/1to5kb.NA/exon.NA/intergenic.NA	2.50473e-06	hyper
chr5	180075411	180077240	shore:13851/island:7541/shore:13852	promoter.FLT4/CDS.FLT4/5UTR.FLT4/exon.FLT4/intron.FLT4	2.56275e-06	hyper
chr14	33401441	33404680	shore:31314/island:17131/shore:31315	1to5kb.NPAS3/intergenic.NA	2.56275e-06	hyper
chr5	149681411	149682470	shore:13320/island:7251	CDS.ARSI/5UTR.ARSI/exon.ARSI/intron.ARSI	2.56275e-06	hyper
chr7	116962521	116964390	shore:18271/island:9972	promoter.WNT2/1to5kb.WNT2/CDS.WNT2/5UTR.WNT2/exon.WNT2/intron.WNT2	2.56567e-06	hyper
chr17	58218361	58219230	shore:38601/island:21161/shore:38602	intergenic.NA	2.56567e-06	hyper
chr13	79169421	79171860	shore:30575/island:16712/shore:30576	intron.RNF219-AS1	2.56567e-06	hyper
chr2	137521871	137524030	shore:6417/island:3471/shore:6418	promoter.THSD7B/1to5kb.THSD7B/exon.THSD7B/intron.THSD7B	2.62958e-06	hyper
chr21	28337511	28340520	shore:46305/island:25612/shore:46306	promoter.ADAMTS5/1to5kb.ADAMTS5/CDS.ADAMTS5/5UTR.ADAMTS5/exon.ADAMTS5/intron.ADAMTS5	2.63383e-06	hyper
chr1	208083491	208084870	shore:3923/island:2126/shore:3924	promoter.CD34/CDS.CD34/5UTR.CD34/exon.CD34/intron.CD34	2.72791e-06	hyper
chr9	101705651	101707210	shore:21964/island:11993/shore:21965	promoter.COL15A1/CDS.COL15A1/5UTR.COL15A1/exon.COL15A1/intron.COL15A1	2.76645e-06	hyper
chr7	155744091	155744650	inter:7759	intergenic.NA	2.95544e-06	hypo
chr11	92702271	92703720	shore:27200/island:14890/shore:27201	promoter.MTNR1B/CDS.MTNR1B/5UTR.MTNR1B/exon.MTNR1B/intron.MTNR1B	3.04001e-06	hyper
chr9	21967041	21969270	shore:21123/island:11544/shore:21124	promoter.CDKN2A-DT/CDS.CDKN2A-DT/CDS.CDKN2A/5UTR.CDKN2A-DT/exon.CDKN2A-DT/exon.CDKN2A/intron.MTAP/intron.CDKN2A/3UTR.CDKN2A-DT/3UTR.CDKN2A	3.13678e-06	hyper
chr3	62353341	62360740	shore:8545/island:4632/shore:8546/island:4633/shore:8547/island:4634/shore:8548/island:4635/shore:8549/island:4636/shore:8550	promoter.FEZF2/1to5kb.FEZF2/CDS.FEZF2/5UTR.FEZF2/exon.FEZF2/intron.FEZF2/3UTR.FEZF2/intergenic.NA	3.14869e-06	hyper
chr16	31548021	31549490	shore:35356/island:19364/shore:35357	intergenic.NA	3.20342e-06	hyper
chr8	91803351	91804500	shore:20172/island:11009/shore:20173	promoter.NECAB1/promoter.TMEM64/CDS.NECAB1/5UTR.NECAB1/5UTR.TMEM64/exon.NECAB1/exon.TMEM64/intron.NECAB1/intron.TMEM64	3.23572e-06	hyper
chr19	37286281	37288970	shelf:36414/shore:43055/island:23763/shore:43056	promoter.ZNF790-AS1/1to5kb.ZNF790-AS1/exon.ZNF790-AS1/intron.ZNF790-AS1	3.24787e-06	hyper
chr5	45694761	45696850	shore:12233/island:6654/shore:12234	promoter.HCN1/CDS.HCN1/5UTR.HCN1/exon.HCN1/intron.HCN1	3.29867e-06	hyper
chr6	26777671	26781580	inter:5940	promoter.NA/1to5kb.NA/exon.NA/intergenic.NA	3.36656e-06	hyper
chr8	54163011	54164730	shore:19845/island:10835/shore:19846	promoter.OPRK1/1to5kb.OPRK1/CDS.OPRK1/5UTR.OPRK1/exon.OPRK1/intron.OPRK1	3.37861e-06	hyper
chr6	108495351	108496850	shore:15434/island:8412/shore:15435/island:8413	CDS.NR2E1/exon.NR2E1/intron.NR2E1	3.44806e-06	hyper
chr16	86541031	86542700	shore:36222/island:19831	promoter.FENDRR/1to5kb.FOXF1/exon.FENDRR/intron.FENDRR	3.51557e-06	hyper
chr8	143530251	143534450	shore:20597/island:11237/shore:20598/island:11238	intergenic.NA	3.52809e-06	hyper
chr2	5830551	5834520	shore:4691/island:2542/shore:4692/island:2543/shore:4693	promoter.SOX11/1to5kb.SOX11/CDS.SOX11/5UTR.SOX11/exon.SOX11/3UTR.SOX11	3.66862e-06	hyper
chr7	45612961	45615820	shore:17281/island:9445/shore:17282	promoter.ADCY1/1to5kb.ADCY1/CDS.ADCY1/5UTR.ADCY1/exon.ADCY1/intron.ADCY1	3.66862e-06	hyper
chr7	905321	908730	shore:16346/island:8906/shore:16347/shelf:14221	CDS.SUN1/exon.SUN1/exon.GET4/intron.SUN1/intron.GET4	3.69134e-06	hyper
chr16	28073561	28075470	shore:35079/island:19214/shore:35080	promoter.GSG1L/CDS.GSG1L/5UTR.GSG1L/exon.GSG1L/intron.GSG1L	3.96331e-06	hyper
chr8	54791481	54796230	shore:19854/island:10840/shore:19855	promoter.RGS20/1to5kb.RGS20/CDS.RGS20/5UTR.RGS20/exon.RGS20/intron.RGS20	3.96331e-06	hyper
chr10	50816791	50821010	shore:23848/island:13028/shore:23849/island:13029/shore:23850	promoter.CHAT/promoter.SLC18A3/1to5kb.SLC18A3/1to5kb.CHAT/CDS.SLC18A3/5UTR.CHAT/5UTR.SLC18A3/exon.CHAT/exon.SLC18A3/intron.CHAT/3UTR.SLC18A3	3.99094e-06	hyper
chr6	10389471	10391830	shore:14076/island:7671/shore:14077/island:7672/shore:14078	intergenic.NA	3.99094e-06	hyper
chr16	58018111	58020230	shore:35687/island:19542/shore:35688/island:19543/shore:35689	CDS.TEPP/exon.TEPP/intron.TEPP	3.99094e-06	hyper
chr17	50234761	50238100	shore:38485/island:21099/shore:38486	promoter.CA10/1to5kb.CA10/CDS.CA10/5UTR.CA10/exon.CA10/intron.CA10	3.99442e-06	hyper
chr11	115629681	115631550	shore:27384/island:14984/shore:27385	promoter.LINC00900/exon.LINC00900/intron.LINC00900	3.99442e-06	hyper
chr2	95690531	95694230	shore:5744/island:3110/shore:5745	promoter.MAL/CDS.MAL/5UTR.MAL/exon.MAL/intron.MAL	4.05432e-06	hyper
chr10	13932601	13934490	shore:23412/island:12801/shore:23413	intron.FRMD4A	4.25592e-06	hyper
chr7	150033541	150035030	shelf:16170	promoter.NA/CDS.LRRC61/CDS.NA/5UTR.LRRC61/exon.LRRC61/exon.NA/intron.LRRC61/3UTR.LRRC61	4.29204e-06	hyper
chr3	11033941	11035670	shore:7755/island:4209/shore:7756	promoter.SLC6A1/5UTR.SLC6A1/exon.SLC6A1/intron.SLC6A1	4.3456e-06	hyper
chr2	237144841	237146880	shore:7366/island:3995/shore:7367	CDS.ASB18/exon.ASB18/intron.ASB18/3UTR.ASB18	4.37913e-06	hyper
chr3	128719431	128721550	shore:9042/island:4889/shore:9043	promoter.EFCC1/1to5kb.EFCC1/CDS.EFCC1/exon.EFCC1/intron.EFCC1	4.43316e-06	hyper
chr1	146548351	146552900	shore:2874/island:1563/shore:2875/island:1564/shore:2876/island:1565/shore:2877/island:1566/shore:2878	promoter.NA/1to5kb.NA/exon.NA/intergenic.NA	4.50125e-06	hyper
chr19	10563401	10564080	inter:16704	promoter.PDE4A/CDS.PDE4A/5UTR.PDE4A/exon.PDE4A/intron.PDE4A	4.66482e-06	hyper
chr1	229566931	229570910	shore:4285/island:2326/shore:4286	promoter.ACTA1/1to5kb.ACTA1/CDS.ACTA1/5UTR.ACTA1/exon.ACTA1/intron.ACTA1/3UTR.ACTA1/intergenic.NA	4.82009e-06	hyper
chr4	172733561	172735410	shore:11499/island:6239/shore:11500	promoter.GALNTL6/1to5kb.GALNTL6/5UTR.GALNTL6/exon.GALNTL6/intron.GALNTL6	4.82654e-06	hyper
chr5	140864141	140865850	shore:13213/island:7194/shore:13214	promoter.PCDHGC4/1to5kb.PCDHGC5/CDS.PCDHGC4/exon.PCDHGC4/intron.PCDHGA1/intron.PCDHGA2/intron.PCDHGA3/intron.PCDHGB1/intron.PCDHGA4/intron.PCDHGB2/intron.PCDHGA5/intron.PCDHGB3/intron.PCDHGA6/intron.PCDHGA7/intron.PCDHGB4/intron.PCDHGA8/intron.PCDHGB5/intron.PCDHGA9/intron.PCDHGB6/intron.PCDHGA10/intron.PCDHGB7/intron.PCDHGA11/intron.PCDHGA12/intron.PCDHGC3	4.94762e-06	hyper
chr12	85304981	85307300	shore:28951/island:15820/shore:28952/island:15821/shore:28953/island:15822/shore:28954	promoter.SLC6A15/5UTR.SLC6A15/exon.SLC6A15/intron.SLC6A15	4.95452e-06	hyper
chr2	171673821	171675830	island:3564/shore:6591	CDS.GAD1/5UTR.GAD1/exon.GAD1/intron.GAD1	5.02012e-06	hyper
chr7	79081261	79084330	shore:17801/island:9724/shore:17802/island:9725/shore:17803/island:9726/shore:17804	promoter.MAGI2-AS3/promoter.MAGI2/1to5kb.MAGI2-AS3/1to5kb.MAGI2/CDS.MAGI2/5UTR.MAGI2/exon.MAGI2-AS3/exon.MAGI2/intron.MAGI2-AS3/intron.MAGI2	5.04653e-06	hyper
chr1	942191	942810	inter:15	intergenic.NA	5.06839e-06	hypo
chr3	237981	240470	shore:7644/island:4151/shore:7645	promoter.CHL1/1to5kb.CHL1/5UTR.CHL1/exon.CHL1/intron.CHL1	5.12488e-06	hyper
chr11	69588571	69590790	shore:26866/island:14714/shore:26867	promoter.FGF4/CDS.FGF4/5UTR.FGF4/exon.FGF4/intron.FGF4	5.19619e-06	hyper
chr2	115419331	115420560	shore:6078/island:3286/shore:6079	intron.DPP10	5.19619e-06	hyper
chr7	35300491	35302110	shore:17141/island:9371/shore:17142	intergenic.NA	5.21144e-06	hyper
chr6	151560531	151562860	shore:15827/island:8620/shore:15828/island:8621/shore:15829	promoter.AKAP12/CDS.AKAP12/5UTR.AKAP12/exon.AKAP12/intron.AKAP12	5.22118e-06	hyper
chr16	87636181	87637900	shore:36264/island:19856/shore:36265	promoter.JPH3/CDS.JPH3/5UTR.JPH3/exon.JPH3/intron.JPH3/3UTR.JPH3	5.30432e-06	hyper
chr9	113340911	113342350	shore:22070/island:12048/shore:22071	promoter.SVEP1/CDS.SVEP1/5UTR.SVEP1/exon.SVEP1/intron.SVEP1	5.54374e-06	hyper
chr9	96713841	96718410	island:11918/shore:21828	promoter.BARX1/1to5kb.BARX1/CDS.BARX1/5UTR.BARX1/exon.BARX1/intron.BARX1/3UTR.BARX1/intergenic.NA	5.58538e-06	hyper
chr11	94501131	94503180	shore:27230/island:14905/shore:27231	promoter.AMOTL1/CDS.AMOTL1/5UTR.AMOTL1/exon.AMOTL1/intron.AMOTL1	5.61113e-06	hyper
chr1	98518731	98520130	shore:2480/island:1354/shore:2481	1to5kb.MIR137HG	5.64366e-06	hyper
chr8	144239641	144242470	shore:20644/island:11263/shore:20645	promoter.LY6H/1to5kb.LY6H/CDS.LY6H/5UTR.LY6H/exon.LY6H/intron.LY6H/3UTR.LY6H	5.64366e-06	hyper
chr12	58025361	58026690	shore:28764/island:15724	promoter.B4GALNT1/CDS.B4GALNT1/5UTR.B4GALNT1/exon.B4GALNT1/intron.B4GALNT1	5.70996e-06	hyper
chr19	13616081	13617700	shore:42131/island:23239/shore:42132	promoter.CACNA1A/CDS.CACNA1A/5UTR.CACNA1A/exon.CACNA1A/intron.CACNA1A	5.77037e-06	hyper
chr5	180016901	180019200	shore:13844/island:7537/shore:13845	promoter.SCGB3A1/CDS.SCGB3A1/5UTR.SCGB3A1/exon.SCGB3A1/intron.SCGB3A1/3UTR.SCGB3A1/intergenic.NA	5.79238e-06	hyper
chr1	200007211	200008340	shore:3722	promoter.NR5A2/1to5kb.NR5A2/exon.NR5A2/intron.NR5A2	5.80621e-06	hyper
chr1	119548501	119551560	shore:2749/island:1495/shore:2750	intergenic.NA	5.80621e-06	hyper
chr13	53312541	53314310	shore:30501/island:16671/shore:30502	promoter.CNMD/CDS.CNMD/5UTR.CNMD/exon.CNMD/intron.CNMD	5.99596e-06	hyper
chr10	106399291	106403450	shore:24670/island:13476/shore:24671	promoter.SORCS3/1to5kb.SORCS3/CDS.SORCS3/5UTR.SORCS3/exon.SORCS3/intron.SORCS3	6.03114e-06	hyper
chr17	72347661	72348660	shore:38809/island:21275/shore:38810	CDS.KIF19/exon.KIF19/intron.KIF19	6.07344e-06	hyper
chr4	17782461	17784110	shore:10463/island:5680/shore:10464	promoter.FAM184B/CDS.FAM184B/5UTR.FAM184B/exon.FAM184B/intron.FAM184B	6.09703e-06	hyper
chr2	114048481	114049370	shore:6057/island:3275/shore:6058	intergenic.NA	6.17113e-06	hyper
chr10	129533451	129537810	shore:24938/island:13618/shore:24939	promoter.FOXI2/promoter.NA/1to5kb.FOXI2/1to5kb.NA/CDS.FOXI2/CDS.NA/5UTR.NA/exon.FOXI2/exon.NA/intron.FOXI2/3UTR.FOXI2/3UTR.NA	6.20143e-06	hyper
chr5	138728421	138731210	island:7069/shore:13009	promoter.PROB1/1to5kb.MZB1/CDS.PROB1/5UTR.PROB1/exon.PROB1	6.20143e-06	hyper
chr7	142493971	142495520	shore:18538/island:10114/shore:18539	promoter.NA/1to5kb.NA/CDS.NA/exon.NA/intron.NA/3UTR.NA	6.27904e-06	hyper
chr8	58906551	58908110	shore:19908/island:10870/shore:19909	promoter.FAM110B/5UTR.FAM110B/exon.FAM110B/intron.FAM110B	6.29799e-06	hyper
chr15	28351181	28355740	shore:32676/island:17864/shore:32677	intergenic.NA	6.45687e-06	hyper
chr8	99438201	99441470	shore:20249/island:11050/shore:20250	promoter.KCNS2/promoter.NA/1to5kb.KCNS2/1to5kb.NA/CDS.KCNS2/CDS.NA/5UTR.KCNS2/exon.KCNS2/exon.NA/intron.KCNS2	6.5544e-06	hyper
chr20	37302351	37303870	shore:45419/island:25112/shore:45420	intergenic.NA	6.55833e-06	hyper
chr14	101377171	101377660	inter:13199	promoter.NA/1to5kb.NA/exon.NA	6.69622e-06	hypo
chr3	181428011	181429010	shelf:8397/shore:9519	promoter.SOX2/1to5kb.SOX2/intron.SOX2-OT	6.7418e-06	hyper
chr10	134900911	134903870	shore:25151/island:13740/shore:25152	promoter.ADGRA1/CDS.ADGRA1/5UTR.ADGRA1/exon.ADGRA1/intron.ADGRA1	6.82106e-06	hyper
chr6	10381291	10383470	shore:14072/island:7668/shore:14073	intergenic.NA	6.86101e-06	hyper
chr6	108440041	108441530	island:8407/shore:15426	1to5kb.NA	6.86671e-06	hyper
chr20	54578001	54581290	shore:45715/island:25269/shore:45716	promoter.CBLN4/CDS.CBLN4/5UTR.CBLN4/exon.CBLN4/intron.CBLN4	6.87735e-06	hyper
chr20	47934461	47936580	shore:45632/island:25226/shore:45633	intergenic.NA	7.08519e-06	hyper
chr6	87646551	87647900	shore:15253/island:8308/shore:15254	promoter.HTR1E/5UTR.HTR1E/exon.HTR1E/intron.HTR1E	7.13128e-06	hyper
chr5	172658851	172662420	shore:13548/island:7374/shore:13549/island:7375/shore:13550/island:7376/shore:13551	promoter.NKX2-5/CDS.NKX2-5/5UTR.NKX2-5/exon.NKX2-5/intron.NKX2-5/3UTR.NKX2-5/intergenic.NA	7.26688e-06	hyper
chr1	145978721	145980780	shore:2853/island:1550/shore:2854	promoter.NA/1to5kb.NA/exon.NA/intron.NBPF20/intron.NBPF10	7.35702e-06	hyper
chr6	152128261	152130620	shore:15840/island:8627/shore:15841	promoter.ESR1/CDS.ESR1/5UTR.ESR1/exon.ESR1/intron.ESR1/3UTR.ESR1	7.48077e-06	hyper
chr4	111532551	111534410	shore:11093/island:6016/shore:11094	intergenic.NA	7.59042e-06	hyper
chr6	58146401	58149920	inter:6264	promoter.NA/1to5kb.NA/exon.NA/intergenic.NA	7.59964e-06	hyper
chr2	73518191	73521080	shore:5509/island:2985/shore:5510	promoter.EGR4/1to5kb.NA/CDS.EGR4/5UTR.EGR4/exon.EGR4/intron.EGR4/3UTR.EGR4	7.63256e-06	hyper
chr16	71459481	71460630	shore:35952/island:19687/shore:35953	promoter.NA/exon.NA/intergenic.NA	7.65447e-06	hyper
chr1	229542611	229544220	shore:4283/island:2325/shore:4284	intergenic.NA	7.74819e-06	hyper
chr4	155410331	155412750	shore:11403/island:6189	CDS.DCHS2/5UTR.DCHS2/exon.DCHS2/intron.DCHS2	7.75441e-06	hyper
chr6	127438601	127442500	shore:15593/island:8495/shore:15594/island:8496/shore:15595	promoter.RSPO3/promoter.NA/1to5kb.RSPO3/1to5kb.NA/CDS.RSPO3/5UTR.RSPO3/exon.RSPO3/exon.NA/intron.RSPO3/intron.NA	7.75441e-06	hyper
chr6	10420711	10423110	shore:14089/island:7681/shore:14090/island:7682/shore:14091	promoter.TFAP2A/1to5kb.TFAP2A	7.75441e-06	hyper
chr5	115265631	115266280	inter:5337	intergenic.NA	7.75441e-06	hypo
chr18	3013931	3014380	shore:39606	1to5kb.LPIN2	7.75441e-06	hypo
chr3	172165121	172168600	shore:9471/island:5117/shore:9472/island:5118/shore:9473	promoter.GHSR/1to5kb.GHSR/CDS.GHSR/5UTR.GHSR/exon.GHSR/intron.GHSR/3UTR.GHSR	7.75441e-06	hyper
chr7	149916291	149919330	shore:18643/island:10168/shore:18644	intergenic.NA	7.80952e-06	hyper
chr17	47987261	47988360	shore:38407/island:21058/shore:38408	intergenic.NA	7.87701e-06	hyper
chr1	35394281	35396370	shore:1545/island:859/shore:1546	intergenic.NA	7.90163e-06	hyper
chr20	39315401	39317920	shore:45437/island:25122/shore:45438/island:25123	promoter.MAFB/CDS.MAFB/5UTR.MAFB/exon.MAFB/3UTR.MAFB	7.90236e-06	hyper
chr8	109093511	109096260	shore:20341/island:11099/shore:20342	promoter.RSPO2/1to5kb.RSPO2/CDS.RSPO2/5UTR.RSPO2/exon.RSPO2/intron.RSPO2	7.90685e-06	hyper
chr10	110671401	110672570	shore:24678/island:13480/shore:24679	intergenic.NA	8.04837e-06	hyper
chr5	115150981	115153000	shore:12734/island:6922/shore:12735	promoter.CDO1/CDS.CDO1/5UTR.CDO1/exon.CDO1/intron.CDO1	8.1358e-06	hyper
chr8	57069361	57070360	shore:19883/island:10856/shore:19884	intergenic.NA	8.26006e-06	hyper
chr11	31846081	31849140	shore:25942/island:14201/shore:25943/island:14202/shore:25944	intron.PAX6-AS1/intron.RCN1	8.26723e-06	hyper
chr13	39260881	39263930	shore:30329/island:16580/shore:30330	promoter.FREM2/CDS.FREM2/5UTR.FREM2/exon.FREM2	8.29897e-06	hyper
chr6	150285061	150286800	island:8609/shore:15806	promoter.ULBP1/CDS.ULBP1/5UTR.ULBP1/exon.ULBP1/intron.ULBP1	8.62898e-06	hyper
chr20	61990241	61993810	shore:46042/island:25454/shore:46043	promoter.CHRNA4/1to5kb.CHRNA4/CDS.CHRNA4/5UTR.CHRNA4/exon.CHRNA4/intron.CHRNA4	8.62898e-06	hyper
chr1	110692701	110694500	shore:2601/island:1416/shore:2602	promoter.SLC6A17/5UTR.SLC6A17/exon.SLC6A17/intron.SLC6A17	8.62898e-06	hyper
chr2	5835751	5837890	shore:4693/island:2544/shore:4694	exon.SOX11/3UTR.SOX11	8.78838e-06	hyper
chr1	207842371	207843570	shore:3917/island:2123/shore:3918	intron.CR1L	8.78838e-06	hyper
chr1	111215601	111218590	shore:2616/island:1424/shore:2617	promoter.KCNA3/CDS.KCNA3/5UTR.KCNA3/exon.KCNA3/3UTR.KCNA3	8.95551e-06	hyper
chr11	12029451	12031230	shore:25747/island:14093/shore:25748	promoter.DKK3/1to5kb.DKK3/CDS.DKK3/5UTR.DKK3/exon.DKK3/intron.DKK3	9.05467e-06	hyper
chr7	8479961	8484360	shelf:14576/shore:16850/island:9204/shore:16851/island:9205/shore:16852	intron.NXPH1	9.05467e-06	hyper
chr8	67873111	67875910	shore:19994/island:10917/shore:19995	promoter.TCF24/1to5kb.TCF24/CDS.TCF24/5UTR.TCF24/exon.TCF24/intron.TCF24	9.10458e-06	hyper
chr21	38063981	38067280	shore:46423/island:25673/shore:46424	1to5kb.SIM2/intergenic.NA	9.29703e-06	hyper
chr12	29935651	29937750	shore:28156/island:15391/shore:28157	promoter.TMTC1/1to5kb.TMTC1/CDS.TMTC1/5UTR.TMTC1/exon.TMTC1/intron.TMTC1	9.40585e-06	hyper
chr12	122015881	122017350	shore:29491/island:16112	CDS.KDM2B/5UTR.KDM2B/exon.KDM2B/intron.KDM2B	9.47203e-06	hyper
chr8	23083261	23084140	shore:19526	promoter.TNFRSF10A/1to5kb.TNFRSF10A/exon.LOC389641/intron.LOC389641	9.50281e-06	hypo
chr8	49647251	49648730	shore:19821/island:10823/shore:19822	promoter.EFCAB1/CDS.EFCAB1/5UTR.EFCAB1/exon.EFCAB1/intron.EFCAB1	9.50281e-06	hyper
chr20	25061441	25063300	shore:45138/island:24962/shore:45139	promoter.VSX1/CDS.VSX1/5UTR.VSX1/exon.VSX1/intron.VSX1	9.52363e-06	hyper
chr13	53418641	53423420	shore:30503/island:16672/shore:30504	promoter.PCDH8/CDS.PCDH8/5UTR.PCDH8/exon.PCDH8/intron.PCDH8/3UTR.PCDH8	9.89723e-06	hyper
chr11	134281021	134283020	shore:27735/island:15171/shore:27736	promoter.LOC283177/promoter.B3GAT1/1to5kb.LOC283177/1to5kb.B3GAT1/5UTR.B3GAT1/exon.LOC283177/exon.B3GAT1/intron.LOC283177/intron.B3GAT1	1.01196e-05	hyper
chr5	38555901	38557840	shore:12164/island:6616/shore:12165	promoter.NA/promoter.LIFR/promoter.MIR3650/1to5kb.NA/1to5kb.LIFR/5UTR.LIFR/exon.NA/exon.LIFR/exon.MIR3650/intron.LIFR	1.01253e-05	hyper
chr11	125034911	125037660	island:15097/shore:27598	intron.PKNOX2	1.01253e-05	hyper
chr7	143579121	143581150	shelf:16086/shore:18556	intron.TCAF1	1.01981e-05	hyper
chr8	65710641	65712050	shore:19962/island:10900/shore:19963	promoter.CYP7B1/CDS.CYP7B1/5UTR.CYP7B1/exon.CYP7B1/intron.CYP7B1	1.04106e-05	hyper
chr1	16084461	16086970	shore:835/island:484/shore:836	promoter.FBLIM1/1to5kb.FBLIM1/5UTR.FBLIM1/exon.FBLIM1/intron.FBLIM1	1.04106e-05	hyper
chr16	86611651	86614110	shore:36234/island:19839/shore:36235	promoter.FOXL1/CDS.FOXL1/5UTR.FOXL1/exon.FOXL1/3UTR.FOXL1	1.04106e-05	hyper
chr2	70994201	70995770	shore:5441/island:2948/shore:5442	promoter.ADD2/CDS.ADD2/5UTR.ADD2/exon.ADD2/intron.ADD2	1.05649e-05	hyper
chr6	166401781	166403000	island:8700/shore:15986	promoter.LINC00473/1to5kb.NA/1to5kb.LINC00473/exon.LINC00602/3UTR.LINC00602	1.09147e-05	hyper
chr1	115879711	115881620	shore:2696/island:1466/shore:2697	promoter.NGF/5UTR.NGF/exon.NGF/intron.NGF	1.09147e-05	hyper
chr9	127264881	127268760	shore:22283/island:12167/shore:22284	promoter.NR5A1/1to5kb.NR5A1/CDS.NR5A1/5UTR.NR5A1/exon.NR5A1/intron.NR5A1	1.0969e-05	hyper
chr9	21970181	21971540	shore:21124/island:11545/shore:21125	CDS.CDKN2A/exon.CDKN2A/intron.MTAP/intron.CDKN2A/3UTR.CDKN2A	1.115e-05	hyper
chr16	55357101	55359250	shore:35599/island:19494/shore:35600	promoter.IRX6/1to5kb.IRX6/CDS.IRX6/5UTR.IRX6/exon.IRX6/intron.IRX6	1.13514e-05	hyper
chr13	58203271	58209450	shore:30523/island:16685/shore:30524/island:16686/shore:30525	promoter.PCDH17/1to5kb.PCDH17/CDS.PCDH17/5UTR.PCDH17/exon.PCDH17/intron.PCDH17	1.17476e-05	hyper
chr9	101469111	101472430	shore:21958/island:11990/shore:21959	promoter.GABBR2/CDS.GABBR2/5UTR.GABBR2/exon.GABBR2/intron.GABBR2	1.17731e-05	hyper
chr3	69590701	69592350	shore:8600/island:4663/shore:8601	promoter.FRMD4B/exon.FRMD4B/intron.FRMD4B	1.17914e-05	hyper
chr11	8040101	8041830	shore:25676/island:14056/shore:25677	promoter.TUB/1to5kb.NA/CDS.TUB/5UTR.TUB/exon.TUB/intron.TUB	1.19267e-05	hyper
chr6	100914961	100916110	island:8374/shore:15367/island:8375/shore:15368	1to5kb.SIM1	1.20242e-05	hyper
chr8	143594961	143595980	shelf:17872	intron.ADGRB1	1.20242e-05	hypo
chr2	119602381	119608200	shore:6102/island:3299/shore:6103/island:3300/shore:6104/island:3301/shore:6105/island:3302/shore:6106/island:3303/shore:6107	promoter.EN1/1to5kb.EN1/CDS.EN1/5UTR.EN1/exon.EN1/intron.EN1	1.21589e-05	hyper
chr7	30951301	30952200	inter:7023	promoter.AQP1/CDS.AQP1/5UTR.AQP1/exon.AQP1/intron.AQP1	1.21589e-05	hyper
chr12	54378601	54381320	shore:28592/island:15625/shore:28593	promoter.HOXC10/1to5kb.MIR196A2/CDS.HOXC10/5UTR.HOXC10/exon.HOXC10/intron.HOXC10	1.22422e-05	hyper
chr20	3640881	3642380	shore:44913/island:24837/shore:44914	CDS.GFRA4/exon.GFRA4/intron.GFRA4/3UTR.GFRA4	1.23449e-05	hyper
chr9	77112451	77115150	shore:21621/island:11808/shore:21622/island:11809/shore:21623	CDS.RORB/5UTR.RORB/exon.RORB/intron.RORB	1.23449e-05	hyper
chr8	103750811	103751170	shore:20304/island:11080/shore:20305	intergenic.NA	1.23657e-05	hypo
chr2	115918431	115921070	shore:6080/island:3287/shore:6081	promoter.DPP10/promoter.DPP10-AS1/1to5kb.DPP10/1to5kb.DPP10-AS1/CDS.DPP10/5UTR.DPP10/exon.DPP10/exon.DPP10-AS1/intron.DPP10/intron.DPP10-AS1	1.23805e-05	hyper
chr1	119542711	119544540	shore:2746/island:1493/shore:2747/island:1494/shore:2748	intergenic.NA	1.26094e-05	hyper
chr12	114876881	114879400	shore:29326/island:16021/shore:29327	intergenic.NA	1.26094e-05	hyper
chr19	58569691	58572720	shore:44693/island:24714/shore:44694	promoter.ZNF135/CDS.ZNF135/5UTR.ZNF135/exon.ZNF135/intron.ZNF135	1.2615e-05	hyper
chr5	155106991	155109650	shore:13395/island:7290/shore:13396	intergenic.NA	1.2816e-05	hyper
chr3	147108241	147112470	shore:9283/island:5017/shore:9284	promoter.ZIC4/1to5kb.ZIC4/CDS.ZIC4/exon.ZIC4/intron.ZIC4	1.28757e-05	hyper
chr8	143591321	143593270	shore:20608/island:11244/shore:20609	CDS.ADGRB1/exon.ADGRB1/intron.ADGRB1	1.35618e-05	hyper
chr5	170740261	170744420	shore:13493/island:7343/shore:13494/island:7344/shore:13495	1to5kb.NA/intergenic.NA	1.37527e-05	hyper
chr14	95239081	95240800	shore:32074/island:17534/shore:32075/island:17535/shore:32076	1to5kb.GSC	1.38714e-05	hyper
chr1	217307181	217312130	shore:4035/island:2187/shore:4036/island:2188/shore:4037/island:2189/shore:4038	promoter.ESRRG/1to5kb.ESRRG/5UTR.ESRRG/exon.ESRRG/intron.ESRRG	1.38714e-05	hyper
chr22	48970531	48973200	shore:47999/island:26516/shore:48000	promoter.FAM19A5/1to5kb.FAM19A5/CDS.FAM19A5/5UTR.FAM19A5/exon.FAM19A5/intron.FAM19A5	1.47279e-05	hyper
chr11	14994921	14996390	shore:25780/island:14110/shore:25781	1to5kb.CALCA	1.47279e-05	hyper
chr7	120968591	120969750	shore:18288/island:9981	promoter.WNT16/1to5kb.WNT16/CDS.WNT16/5UTR.WNT16/exon.WNT16/intron.WNT16	1.47815e-05	hyper
chr16	77468031	77469500	shore:36050/island:19737/shore:36051	promoter.ADAMTS18/1to5kb.ADAMTS18/CDS.ADAMTS18/5UTR.ADAMTS18/exon.ADAMTS18/intron.ADAMTS18	1.48866e-05	hyper
chr22	45368141	45368610	inter:18962	intron.PHF21B	1.48975e-05	hypo
chr2	233215341	233218010	shore:7273/island:3945/shore:7274	intergenic.NA	1.53103e-05	hyper
chr11	47358751	47359580	shore:26131	CDS.MYBPC3/exon.MYBPC3/intron.MYBPC3	1.53915e-05	hypo
chr15	83951571	83954570	shore:33706/island:18406/shore:33707	promoter.BNC1/1to5kb.BNC1/CDS.BNC1/5UTR.BNC1/exon.BNC1/intron.BNC1	1.5404e-05	hyper
chr16	67195321	67200640	shore:35782/island:19596/shore:35783/island:19597/shore:35784	promoter.HSF4/1to5kb.HSF4/1to5kb.NOL3/1to5kb.TRADD/CDS.FBXL8/CDS.HSF4/5UTR.FBXL8/5UTR.HSF4/exon.FBXL8/exon.HSF4/intron.FBXL8/intron.HSF4/3UTR.FBXL8	1.55137e-05	hyper
chr5	37834341	37841020	shore:12159/island:6613/shore:12160/island:6614/shore:12161	promoter.GDNF-AS1/promoter.GDNF/1to5kb.GDNF-AS1/1to5kb.GDNF/CDS.GDNF/5UTR.GDNF/exon.GDNF-AS1/exon.GDNF/intron.GDNF-AS1/intron.GDNF	1.56763e-05	hyper
chr5	76249121	76250790	shore:12480/island:6787/shore:12481	CDS.CRHBP/exon.CRHBP/intron.CRHBP	1.57492e-05	hyper
chr20	34187161	34191230	shore:45325/island:25063/shore:45326	promoter.NA/1to5kb.NA/CDS.NA/5UTR.NA/exon.NA/intron.NA	1.59294e-05	hyper
chr3	10748971	10750250	inter:3232	promoter.ATP2B2/5UTR.ATP2B2/exon.ATP2B2/intron.ATP2B2	1.62636e-05	hyper
chr12	49659631	49660710	shore:28366	intron.TUBA1C	1.62636e-05	hypo
chr8	99984331	99987260	shore:20257/island:11055/shore:20258/island:11056/shore:20259	intergenic.NA	1.63648e-05	hyper
chr17	27043671	27045680	shore:37520/island:20564/shore:37521	promoter.RAB34/promoter.NA/1to5kb.RPL23A/1to5kb.SNORD42B/1to5kb.SNORD4A/1to5kb.SNORD42A/1to5kb.PROCA1/CDS.RAB34/CDS.NA/5UTR.RAB34/5UTR.NA/exon.RAB34/exon.NA/intron.RAB34/intron.NA	1.63648e-05	hyper
chr13	112709171	112713000	shore:30820/island:16847/shore:30821	intergenic.NA	1.64492e-05	hyper
chr4	129556271	129556770	inter:4702	intergenic.NA	1.6537e-05	hypo
chr14	97684751	97686250	shore:32111/island:17553/shore:32112	intergenic.NA	1.66256e-05	hyper
chr15	48936561	48938830	shore:33058/island:18067/shore:33059	promoter.FBN1/CDS.FBN1/5UTR.FBN1/exon.FBN1/intron.FBN1	1.68024e-05	hyper
chr8	139508511	139510200	shore:20490/island:11177/shore:20491	promoter.FAM135B/1to5kb.FAM135B/5UTR.FAM135B/exon.FAM135B/intron.FAM135B	1.69388e-05	hyper
chr4	8858531	8860800	shore:10376/island:5631	intergenic.NA	1.71625e-05	hyper
chr15	101420051	101421440	island:18567/shore:34006	CDS.ALDH1A3/5UTR.ALDH1A3/exon.ALDH1A3/intron.ALDH1A3	1.80729e-05	hyper
chr3	42304681	42307870	shore:8074/island:4378/shore:8075/island:4379/shore:8076	promoter.CCK/1to5kb.CCK/CDS.CCK/5UTR.CCK/exon.CCK/intron.CCK/3UTR.CCK	1.80729e-05	hyper
chr4	8872571	8875290	shore:10379/island:5634/shore:10380/island:5635	promoter.HMX1/1to5kb.HMX1/CDS.HMX1/5UTR.HMX1/exon.HMX1/intron.HMX1	1.82692e-05	hyper
chr5	127871701	127875240	shore:12816/island:6967/shore:12817/island:6968/shore:12818	promoter.FBN2/1to5kb.FBN2/CDS.FBN2/5UTR.FBN2/exon.FBN2/intron.FBN2	1.82692e-05	hyper
chr4	184825981	184828500	shore:11578/island:6283/shore:11579	promoter.STOX2/CDS.STOX2/5UTR.STOX2/exon.STOX2/intron.STOX2	1.83232e-05	hyper
chr9	102590111	102591600	shore:21975/island:11999/shore:21976	CDS.NR4A3/5UTR.NR4A3/exon.NR4A3/intron.NR4A3	1.85166e-05	hyper
chr16	86598561	86602930	shore:36231/island:19837/shore:36232	promoter.FOXC2/1to5kb.FOXC2/CDS.FOXC2/5UTR.FOXC2/exon.FOXC2/3UTR.FOXC2/intergenic.NA	1.85456e-05	hyper
chr9	135454871	135458890	shore:22649/island:12358/shore:22650	promoter.BARHL1/1to5kb.BARHL1/CDS.BARHL1/5UTR.BARHL1/exon.BARHL1/intron.BARHL1	1.871e-05	hyper
chr15	79381491	79384410	shore:33617/island:18361/shore:33618	promoter.RASGRF1/1to5kb.RASGRF1/CDS.RASGRF1/5UTR.RASGRF1/exon.RASGRF1/intron.RASGRF1	1.8729e-05	hyper
chr12	3599791	3603290	shore:27835/island:15222/shore:27836	promoter.PRMT8/promoter.NA/1to5kb.NA/CDS.PRMT8/5UTR.PRMT8/exon.PRMT8/exon.NA/intron.PRMT8/intron.NA	1.91166e-05	hyper
chr7	45959881	45962080	shore:17287/island:9448/shore:17288	promoter.IGFBP3/1to5kb.IGFBP3/CDS.IGFBP3/5UTR.IGFBP3/exon.IGFBP3/intron.IGFBP3	1.91342e-05	hyper
chr7	136553131	136556540	shore:18469/island:10079/shore:18470	promoter.CHRM2/5UTR.CHRM2/exon.CHRM2/intron.CHRM2	1.91342e-05	hyper
chr2	220312421	220314280	shore:7123/island:3862/shore:7124	1to5kb.SPEG/CDS.SPEG/5UTR.SPEG/exon.SPEG/intron.SPEG	1.91342e-05	hyper
chr4	126236131	126239240	island:6071/shore:11197	promoter.FAT4/1to5kb.FAT4/CDS.FAT4/exon.FAT4	1.91342e-05	hyper
chr11	1767481	1770980	shore:25486/island:13953/shore:25487	CDS.IFITM10/exon.IFITM10/intron.MOB2/intron.IFITM10	1.91342e-05	hyper
chr2	63278321	63282080	island:2888/shore:5332/island:2889/shore:5333	1to5kb.LOC100132215/CDS.OTX1/5UTR.OTX1/exon.OTX1/intron.OTX1	1.929e-05	hyper
chr7	96631101	96632150	shore:17912/island:9781/shore:17913	1to5kb.DLX6/intron.DLX6-AS1	1.929e-05	hyper
chr11	101453041	101454970	shore:27259/island:14921/shore:27260	promoter.TRPC6/CDS.TRPC6/5UTR.TRPC6/exon.TRPC6/intron.TRPC6	1.9463e-05	hyper
chr1	9711881	9713270	island:393/shore:669	exon.PIK3CD-AS1/intron.PIK3CD/3UTR.PIK3CD-AS1	1.96833e-05	hyper
chr5	32710871	32714470	island:6593/shore:12120	promoter.NPR3/CDS.NPR3/5UTR.NPR3/exon.NPR3/intron.NPR3	2.0615e-05	hyper
chr3	147138151	147140450	shore:9292/island:5024/shore:9293	intergenic.NA	2.06271e-05	hyper
chr7	103628801	103631320	shore:18186/island:9929/shore:18187	promoter.RELN/1to5kb.RELN/CDS.RELN/5UTR.RELN/exon.RELN/intron.RELN	2.07417e-05	hyper
chr10	122216101	122217870	shore:24825/island:13557/shore:24826	promoter.PLPP4/CDS.PLPP4/5UTR.PLPP4/exon.PLPP4/intron.PLPP4	2.20656e-05	hyper
chr20	57088991	57090560	shore:45781/island:25304/shore:45782	promoter.APCDD1L-DT/promoter.APCDD1L/1to5kb.APCDD1L-DT/CDS.APCDD1L/5UTR.APCDD1L/exon.APCDD1L-DT/exon.APCDD1L/intron.APCDD1L	2.20656e-05	hyper
chr1	70032851	70034800	shore:2250/island:1230/shore:2251	promoter.LRRC7/CDS.LRRC7/5UTR.LRRC7/exon.LRRC7/intron.LRRC7	2.21165e-05	hyper
chr6	108485341	108490510	shore:15431/island:8410	promoter.NR2E1/1to5kb.NR2E1/CDS.NR2E1/5UTR.NR2E1/exon.NR2E1/intron.NR2E1	2.25236e-05	hyper
chr8	65281211	65284830	shore:19951/island:10892/shore:19952	promoter.MIR124-2HG/1to5kb.MIR124-2HG	2.2623e-05	hyper
chr5	145724931	145726120	shore:13275/island:7228/shore:13276	intergenic.NA	2.31514e-05	hyper
chr3	79815351	79816880	shore:8659/island:4694/shore:8660	intron.ROBO1	2.34499e-05	hyper
chr4	147575851	147577030	shore:11338/island:6154/shore:11339	intergenic.NA	2.37024e-05	hyper
chr16	89118351	89119300	shore:36475/island:19988/shore:36476	CDS.NA/5UTR.NA/exon.NA/intron.NA	2.37024e-05	hypo
chr1	203044391	203045980	shore:3810/island:2068/shore:3811	CDS.PPFIA4/exon.PPFIA4/intron.PPFIA4/3UTR.PPFIA4	2.37728e-05	hyper
chr13	29067491	29070100	shore:30228/island:16526/shore:30229	promoter.FLT1/promoter.NA/CDS.FLT1/5UTR.FLT1/exon.FLT1/exon.NA/intron.FLT1	2.38892e-05	hyper
chr6	100441111	100442390	shore:15351/island:8363/shore:15352	promoter.MCHR2-AS1/promoter.MCHR2/5UTR.MCHR2/exon.MCHR2-AS1/exon.MCHR2/intron.MCHR2-AS1/intron.MCHR2	2.40697e-05	hyper
chr6	28414581	28415390	inter:5968	1to5kb.ZSCAN23	2.41106e-05	hyper
chr19	58094451	58096060	shore:44647/island:24690/shore:44648	promoter.ZIK1/1to5kb.ZIK1/1to5kb.ZNF416/CDS.ZIK1/5UTR.ZIK1/exon.ZIK1/intron.ZIK1	2.41676e-05	hyper
chr6	99271811	99273810	shore:15319/island:8342/shore:15320	intergenic.NA	2.45173e-05	hyper
chr1	154297631	154298740	shore:3160/island:1723/shore:3161	promoter.ATP8B2/1to5kb.ATP8B2/5UTR.ATP8B2/exon.AQP10/exon.ATP8B2/intron.ATP8B2/3UTR.AQP10	2.49064e-05	hyper
chr11	105480611	105481880	shore:27281/island:14932/shore:27282	promoter.GRIA4/CDS.GRIA4/5UTR.GRIA4/exon.GRIA4/intron.GRIA4	2.4968e-05	hyper
chr9	3180441	3182010	shore:20974/island:11467/shore:20975	intergenic.NA	2.53115e-05	hyper
chr14	74705931	74709190	shore:31817/island:17399/shore:31818	promoter.VSX2/CDS.VSX2/5UTR.VSX2/exon.VSX2/intron.VSX2	2.54737e-05	hyper
chr9	88136401	88138510	shore:21684/island:11843/shore:21685	intergenic.NA	2.58511e-05	hyper
chr3	27764881	27766670	shore:7938/island:4307/shore:7939	promoter.EOMES/1to5kb.EOMES	2.58511e-05	hyper
chr3	68980181	68982730	shore:8588/island:4657/shore:8589	promoter.FAM19A4/5UTR.FAM19A4/exon.FAM19A4/intron.FAM19A4	2.58511e-05	hyper
chr11	43602221	43605130	shore:26025/island:14247/shore:26026	promoter.MIR129-2/promoter.NA/1to5kb.NA/exon.MIR129-2/exon.NA	2.63124e-05	hyper
chr13	109146531	109149610	shore:30723/island:16795/shore:30724	intergenic.NA	2.66185e-05	hyper
chr2	209270891	209272390	shore:6968/island:3777/shore:6969	promoter.PTH2R/CDS.PTH2R/5UTR.PTH2R/exon.PTH2R/intron.PTH2R	2.66185e-05	hyper
chr5	5137461	5141210	shore:11982/island:6522/shore:11983	promoter.ADAMTS16/1to5kb.ADAMTS16/1to5kb.NA/CDS.ADAMTS16/5UTR.ADAMTS16/exon.ADAMTS16/intron.ADAMTS16	2.66683e-05	hyper
chr15	88798241	88801830	shore:33758/island:18433/shore:33759	promoter.NTRK3/1to5kb.NTRK3/CDS.NTRK3/5UTR.NTRK3/exon.NTRK3/intron.NTRK3-AS1/intron.NTRK3	2.66981e-05	hyper
chr3	186078411	186080480	shore:9630/island:5200/shore:9631	promoter.DGKG/5UTR.DGKG/exon.DGKG/intron.DGKG	2.81076e-05	hyper
chr8	72753561	72755320	shore:20022/island:10931/shore:20023	promoter.MSC-AS1/1to5kb.MSC-AS1/CDS.MSC/exon.MSC/intron.MSC/3UTR.MSC	2.83506e-05	hyper
chr17	75367811	75370890	shore:39011/island:21382/shore:39012	promoter.SEPT9/1to5kb.SEPT9/CDS.SEPT9/5UTR.SEPT9/exon.SEPT9/intron.SEPT9	2.87027e-05	hyper
chr7	1263191	1264410	shore:16427/island:8958/shore:16428	intergenic.NA	2.94467e-05	hyper
chr10	100993251	100994510	shore:24422/island:13328/shore:24423	intron.HPSE2	2.95288e-05	hyper
chr3	26663281	26665570	shore:7924/island:4298/shore:7925	promoter.LRRC3B/1to5kb.LRRC3B/5UTR.LRRC3B/exon.LRRC3B/intron.LRRC3B	2.98677e-05	hyper
chr6	19691471	19692510	shore:14179/island:7728/shore:14180	intergenic.NA	2.98677e-05	hyper
chr1	228193781	228196600	shore:4210/island:2284/shore:4211	promoter.WNT3A/CDS.WNT3A/5UTR.WNT3A/exon.WNT3A/intron.WNT3A	3.01821e-05	hyper
chr1	244079841	244081390	shore:4447/island:2411/shore:4448	promoter.LOC339529/exon.LOC339529/intron.LOC339529	3.0186e-05	hyper
chr10	102893291	102897130	shore:24529/island:13395/shore:24530/island:13396/shore:24531	1to5kb.TLX1NB/CDS.TLX1/exon.TLX1/intron.TLX1/3UTR.TLX1	3.04573e-05	hyper
chr11	69631771	69634960	shore:26870/island:14716/shore:26871	promoter.FGF3/CDS.FGF3/5UTR.FGF3/exon.FGF3/intron.FGF3	3.0767e-05	hyper
chr4	122685031	122686950	shore:11167/island:6056/shore:11168	promoter.PP12613/promoter.TMEM155/5UTR.TMEM155/exon.PP12613/exon.TMEM155/intron.TMEM155	3.08581e-05	hyper
chr1	177139791	177140960	shore:3576/island:1945/shore:3577	promoter.BRINP2/5UTR.BRINP2/exon.BRINP2/intron.BRINP2	3.12437e-05	hyper
chr16	86529651	86533260	shore:36219/island:19829/shore:36220	intron.FENDRR	3.13946e-05	hyper
chr1	18956091	18960060	shore:966/island:554/shore:967	promoter.PAX7/1to5kb.PAX7/CDS.PAX7/5UTR.PAX7/exon.PAX7/intron.PAX7	3.13946e-05	hyper
chr8	41165531	41167760	shore:19721/island:10769/shore:19722	promoter.SFRP1/CDS.SFRP1/5UTR.SFRP1/exon.SFRP1/intron.SFRP1	3.13946e-05	hyper
chr1	153233161	153234640	inter:1245	promoter.NA/CDS.LOR/CDS.NA/5UTR.LOR/exon.LOR/exon.NA/intron.LOR/3UTR.LOR/intergenic.NA	3.13946e-05	hyper
chr13	25620661	25621810	shore:30160/island:16486/shore:30161	intergenic.NA	3.20228e-05	hyper
chr6	5994231	5996570	shore:14020/island:7638/shore:14021/island:7639/shore:14022	intergenic.NA	3.20228e-05	hyper
chr19	48944771	48948190	shore:43898/island:24253/shore:43899	promoter.GRWD1/1to5kb.GRWD1/CDS.GRIN2D/5UTR.GRIN2D/exon.GRIN2D/intron.GRIN2D/3UTR.GRIN2D	3.24803e-05	hyper
chr8	65288971	65293640	shore:19953/island:10894/shore:19954/shelf:17271	promoter.NA/promoter.MIR124-2/1to5kb.NA/1to5kb.MIR124-2/CDS.MIR124-2HG/exon.MIR124-2HG/exon.NA/exon.MIR124-2/intron.MIR124-2HG/intron.NA/3UTR.MIR124-2HG	3.24803e-05	hyper
chr16	86543701	86545500	island:19831/shore:36223	promoter.FOXF1/1to5kb.FENDRR/CDS.FOXF1/5UTR.FOXF1/exon.FOXF1/intron.FOXF1	3.25645e-05	hyper
chr14	76604671	76605660	shore:31875/island:17429/shore:31876	intergenic.NA	3.32503e-05	hyper
chr14	36972901	36974000	shore:31354/island:17152/shore:31355	intron.SFTA3	3.33234e-05	hyper
chr13	26623521	26626580	shore:30178/island:16495/shore:30179	promoter.SHISA2/1to5kb.SHISA2/CDS.SHISA2/5UTR.SHISA2/exon.SHISA2/intron.SHISA2	3.33312e-05	hyper
chr17	77178251	77180460	shore:39094/island:21424/shore:39095	intron.RBFOX3	3.35462e-05	hyper
chr1	155263571	155265870	shore:3230/island:1764/shore:3231	CDS.PKLR/exon.PKLR/intron.PKLR	3.35462e-05	hyper
chr1	63784121	63787590	island:1195	1to5kb.FOXD3/1to5kb.LINC00466	3.39761e-05	hyper
chr9	95996421	95997990	inter:8988	promoter.WNK2/CDS.WNK2/5UTR.WNK2/exon.WNK2/intron.WNK2	3.40977e-05	hyper
chr2	144693971	144695500	shore:6427/island:3476/shore:6428	intergenic.NA	3.41313e-05	hyper
chr22	46261241	46264070	shore:47883/island:26455/shore:47884	intergenic.NA	3.44431e-05	hyper
chr3	147113391	147116690	shore:9284/island:5018/shore:9285/island:5019/shore:9286	promoter.ZIC4/1to5kb.ZIC4/CDS.ZIC4/5UTR.ZIC4/exon.ZIC4/intron.ZIC4	3.44682e-05	hyper
chr19	15121271	15122500	shore:42229/island:23295/shore:42230	promoter.CCDC105/promoter.SLC1A6/1to5kb.SLC1A6/CDS.CCDC105/CDS.SLC1A6/5UTR.CCDC105/5UTR.SLC1A6/exon.CCDC105/exon.SLC1A6/intron.CCDC105/intron.SLC1A6	3.45499e-05	hyper
chr4	134071191	134074240	shore:11239/island:6102/shore:11240	promoter.NA/1to5kb.NA/CDS.PCDH10/5UTR.PCDH10/exon.PCDH10/intron.PCDH10/3UTR.PCDH10	3.45499e-05	hyper
chr3	128711721	128712670	shore:9040/island:4888	promoter.KIAA1257/1to5kb.KIAA1257/CDS.KIAA1257/5UTR.KIAA1257/exon.KIAA1257/intron.KIAA1257	3.48515e-05	hyper
chr7	71800441	71803060	shore:17605/island:9621/shore:17606	promoter.CALN1/5UTR.CALN1/exon.CALN1/intron.CALN1	3.4899e-05	hyper
chr13	25945711	25947410	shore:30172/island:16492/shore:30173	promoter.ATP8A2/CDS.ATP8A2/5UTR.ATP8A2/exon.ATP8A2/intron.ATP8A2	3.4899e-05	hyper
chr3	137481641	137482540	shore:9163	promoter.SOX14/1to5kb.SOX14	3.4899e-05	hyper
chr7	40174601	40176170	island:9397/shore:17192	promoter.MPLKIP/1to5kb.MPLKIP/CDS.SUGCT/exon.SUGCT/intron.SUGCT	3.49307e-05	hyper
chr3	157811751	157814000	shore:9379/island:5068/shore:9380	exon.SHOX2/3UTR.SHOX2/intergenic.NA	3.50915e-05	hyper
chr15	68117301	68122920	island:18220/shore:33349	CDS.SKOR1/exon.SKOR1/intron.SKOR1	3.56588e-05	hyper
chr10	94819501	94823500	shore:24318/island:13273/shore:24319	promoter.CYP26C1/1to5kb.CYP26C1/CDS.CYP26C1/exon.CYP26C1/intron.CYP26C1	3.59448e-05	hyper
chr16	10273631	10277650	shore:34772/island:19048/shore:34773	promoter.GRIN2A/1to5kb.GRIN2A/CDS.GRIN2A/5UTR.GRIN2A/exon.GRIN2A/intron.GRIN2A/3UTR.GRIN2A	3.60475e-05	hyper
chr7	88387911	88389610	shore:17844/island:9747/shore:17845	promoter.ZNF804B/CDS.ZNF804B/5UTR.ZNF804B/exon.ZNF804B/intron.ZNF804B	3.60475e-05	hyper
chr3	147140561	147141590	shore:9293	intergenic.NA	3.60475e-05	hyper
chr12	41085991	41087470	shore:28232/island:15432/shore:28233	promoter.CNTN1/5UTR.CNTN1/exon.CNTN1/intron.CNTN1	3.63106e-05	hyper
chr19	15580081	15583210	shore:42279/island:23325/shore:42280/island:23326/shore:42281	1to5kb.RASAL3/CDS.PGLYRP2/exon.PGLYRP2/intron.PGLYRP2/3UTR.PGLYRP2	3.67361e-05	hyper
chr3	134514031	134517140	shore:9145/island:4943/shore:9146	promoter.EPHB1/CDS.EPHB1/5UTR.EPHB1/exon.EPHB1/intron.EPHB1	3.67752e-05	hyper
chr7	1271881	1278870	island:8960	promoter.UNCX/CDS.UNCX/exon.UNCX/intron.UNCX/intergenic.NA	3.69408e-05	hyper
chr4	85416581	85419690	shore:10939/island:5934	promoter.NKX6-1/CDS.NKX6-1/5UTR.NKX6-1/exon.NKX6-1/intron.NKX6-1	3.70957e-05	hyper
chr7	96647141	96648520	shore:17917	1to5kb.DLX6-AS1/intergenic.NA	3.82052e-05	hyper
chr17	6616041	6617860	shore:36963/island:20260/shore:36964	promoter.SLC13A5/1to5kb.SLC13A5/CDS.SLC13A5/5UTR.SLC13A5/exon.SLC13A5/intron.SLC13A5	3.84097e-05	hyper
chr11	32454591	32459070	shore:25953/island:14208/shore:25954	promoter.WT1-AS/promoter.NA/promoter.WT1/1to5kb.WT1-AS/1to5kb.NA/1to5kb.WT1/CDS.WT1/5UTR.WT1/exon.WT1-AS/exon.WT1/intron.WT1-AS/intron.WT1	3.84097e-05	hyper
chr6	134210061	134211620	shore:15641/island:8521/shore:15642	promoter.TCF21/promoter.NA/1to5kb.NA/CDS.TCF21/5UTR.TCF21/exon.TCF21/exon.NA/intron.TCF21	3.85754e-05	hyper
chr1	38509861	38512460	shore:1651/island:915	promoter.POU3F1/CDS.POU3F1/5UTR.POU3F1/exon.POU3F1/3UTR.POU3F1	3.88406e-05	hyper
chr2	50573181	50575140	shore:5237/island:2838/shore:5238	promoter.NRXN1/CDS.NRXN1/5UTR.NRXN1/exon.NRXN1/intron.NRXN1	3.90329e-05	hyper
chr3	137478911	137481530	shore:9161/island:4951/shore:9162/island:4952/shore:9163	1to5kb.SOX14	3.90852e-05	hyper
chr5	177410701	177413320	shore:13713/island:7466/shore:13714/island:7467/shore:13715	intergenic.NA	3.91716e-05	hyper
chr12	129337291	129339210	shore:29702/island:16225/shore:29703	promoter.GLT1D1/CDS.GLT1D1/5UTR.GLT1D1/exon.GLT1D1/intron.GLT1D1	3.95072e-05	hyper
chr1	119525481	119533260	shore:2741/island:1489/shore:2742/island:1490/shore:2743/island:1491/shore:2744	promoter.TBX15/1to5kb.TBX15/5UTR.TBX15/exon.TBX15/intron.TBX15	4.08956e-05	hyper
chr10	118926761	118927810	shore:24771/island:13529	promoter.MIR3663/exon.MIR3663/intron.NA	4.223e-05	hyper
chr7	35292741	35295530	shore:17139/island:9369/shore:17140	promoter.TBX20/1to5kb.TBX20/CDS.TBX20/5UTR.TBX20/exon.TBX20/intron.TBX20	4.25788e-05	hyper
chr19	30718141	30720280	island:23602/shore:42775	intergenic.NA	4.31388e-05	hyper
chr4	8861161	8864060	island:5631/shore:10377	intergenic.NA	4.31404e-05	hyper
chr8	48099931	48101580	shore:19792/island:10808/shore:19793	promoter.LOC100287846/exon.LOC100287846	4.33412e-05	hyper
chr17	59485171	59486270	shore:38617/island:21170/shore:38618	1to5kb.C17orf82/CDS.TBX2/exon.TBX2/intron.TBX2/3UTR.TBX2	4.37923e-05	hyper
chr8	105477991	105479650	shore:20329/island:11093/shore:20330	promoter.DPYS/CDS.DPYS/5UTR.DPYS/exon.DPYS/intron.DPYS	4.51747e-05	hyper
chr5	140855231	140858350	shore:13210/island:7192/shore:13211/island:7193/shore:13212	promoter.PCDHGC3/CDS.PCDHGC3/5UTR.PCDHGC3/exon.PCDHGC3/intron.PCDHGA1/intron.PCDHGA2/intron.PCDHGA3/intron.PCDHGB1/intron.PCDHGA4/intron.PCDHGB2/intron.PCDHGA5/intron.PCDHGB3/intron.PCDHGA6/intron.PCDHGA7/intron.PCDHGB4/intron.PCDHGA8/intron.PCDHGB5/intron.PCDHGA9/intron.PCDHGB6/intron.PCDHGA10/intron.PCDHGB7/intron.PCDHGA11/intron.PCDHGA12/intron.PCDHGC3/3UTR.PCDHGC3	4.55858e-05	hyper
chr1	156814221	156816680	shore:3316/island:1810/shore:3317	CDS.INSRR/exon.INSRR/intron.NTRK1/intron.INSRR	4.67138e-05	hyper
chr21	47273621	47274070	inter:18510	intron.PCBP3	4.6835e-05	hypo
chr8	117950141	117951250	shore:20375/island:11117/shore:20376	promoter.AARD/promoter.NA/CDS.AARD/5UTR.AARD/exon.AARD/exon.NA/intron.AARD	4.71711e-05	hyper
chr11	66187131	66189880	shore:26669/island:14606/shore:26670	promoter.NPAS4/1to5kb.NPAS4/CDS.NPAS4/5UTR.NPAS4/exon.NPAS4/intron.NPAS4	4.76196e-05	hyper
chr4	174449301	174453210	shore:11518/island:6251/shore:11519/island:6252/shore:11520	promoter.HAND2-AS1/promoter.HAND2/1to5kb.HAND2-AS1/1to5kb.HAND2/CDS.HAND2/5UTR.HAND2/exon.HAND2-AS1/exon.HAND2/intron.HAND2-AS1/intron.HAND2	4.793e-05	hyper
chr3	140769351	140772100	shore:9223/island:4986/shore:9224	promoter.SPSB4/1to5kb.SPSB4/5UTR.SPSB4/exon.SPSB4/intron.SPSB4	4.793e-05	hyper
chr2	5521451	5521660	inter:1932	intergenic.NA	4.88066e-05	hypo
chr10	124901441	124903650	shore:24864/island:13578/shore:24865	1to5kb.HMX2/intergenic.NA	4.88815e-05	hyper
chr15	30483331	30485000	shore:32724/island:17891/shore:32725	1to5kb.LINC02249	4.8924e-05	hyper
chr15	60121121	60121680	inter:13613	intergenic.NA	5.07688e-05	hypo
chr1	66257621	66259460	shore:2218/island:1213/shore:2219	promoter.PDE4B/1to5kb.PDE4B/5UTR.PDE4B/exon.PDE4B/intron.PDE4B	5.10307e-05	hyper
chr17	35299051	35301310	island:20689/shore:37750	1to5kb.AATF/CDS.LHX1/exon.LHX1/intron.LHX1/3UTR.LHX1	5.18015e-05	hyper
chr10	106398371	106399210	shore:24670	1to5kb.SORCS3	5.21281e-05	hyper
chr19	18989351	18990270	inter:16957	CDS.GDF1/CDS.CERS1/exon.GDF1/exon.CERS1/intron.GDF1/intron.CERS1/3UTR.CERS1	5.29304e-05	hypo
chr5	178367301	178369630	shore:13757/island:7489/shore:13758	promoter.ZNF454/CDS.ZNF454/5UTR.ZNF454/exon.ZNF454/intron.ZNF454	5.42887e-05	hyper
chr10	63211761	63213640	shore:23930/island:13071/shore:23931	promoter.NA/promoter.TMEM26/CDS.TMEM26/5UTR.TMEM26/exon.NA/exon.TMEM26/intron.NA/intron.TMEM26	5.46894e-05	hyper
chr5	139143511	139144500	shore:13039/island:7086/shore:13040	intergenic.NA	5.4784e-05	hyper
chr20	24449271	24452260	shore:45129/island:24957/shore:45130	promoter.SYNDIG1/5UTR.SYNDIG1/exon.SYNDIG1/intron.SYNDIG1	5.48685e-05	hyper
chr1	50513351	50514640	shore:1997/island:1096/shore:1998	promoter.ELAVL4/CDS.ELAVL4/5UTR.ELAVL4/exon.ELAVL4/intron.ELAVL4	5.57957e-05	hyper
chr2	40678221	40679940	shore:5118/island:2771/shore:5119	promoter.SLC8A1/5UTR.SLC8A1/exon.SLC8A1/intron.SLC8A1	5.61108e-05	hyper
chr4	154709201	154714550	shore:11395/island:6184/shore:11396/island:6185/shore:11397/island:6186/shore:11398	promoter.SFRP2/1to5kb.SFRP2/CDS.SFRP2/5UTR.SFRP2/exon.SFRP2/intron.SFRP2	5.67562e-05	hyper
chr4	1395761	1402710	shore:10016/island:5427/shore:10017/island:5428/shore:10018	intergenic.NA	5.67739e-05	hyper
chr4	7376151	7376430	inter:4308	intron.SORCS2	5.69681e-05	hypo
chr10	102898871	102900770	shore:24531/island:13397/shore:24532/island:13398/shore:24533	intergenic.NA	5.84948e-05	hyper
chr19	46915051	46918720	shore:43739/island:24161/shore:43740/island:24162/shore:43741	promoter.CCDC8/1to5kb.CCDC8/CDS.CCDC8/5UTR.CCDC8/exon.CCDC8	5.84948e-05	hyper
chr10	91294171	91297030	shore:24271/island:13247/shore:24272	promoter.SLC16A12/1to5kb.SLC16A12/5UTR.SLC16A12/exon.SLC16A12/intron.SLC16A12	5.87575e-05	hyper
chr14	76842281	76844150	shore:31881/island:17432/shore:31882	intron.ESRRB	5.97205e-05	hyper
chr12	41581591	41583960	shore:28234/island:15433/shore:28235	promoter.PDZRN4/CDS.PDZRN4/5UTR.PDZRN4/exon.PDZRN4/intron.PDZRN4	5.9814e-05	hyper
chr14	38066581	38068710	shore:31383/island:17174	1to5kb.FOXA1	5.99619e-05	hyper
chr2	88848421	88849910	shore:5692/island:3082/shore:5693	intergenic.NA	6.01316e-05	hyper
chr18	27299771	27300260	inter:16135	intergenic.NA	6.02758e-05	hypo
chr10	23483561	23485010	shore:23507/island:12853/shore:23508	intergenic.NA	6.14381e-05	hyper
chr22	43806981	43808740	shore:47821/island:26423/shore:47822	promoter.MPPED1/1to5kb.MPPED1/5UTR.MPPED1/exon.MPPED1/intron.MPPED1	6.22022e-05	hyper
chr13	25319311	25322470	shore:30150/island:16481/shore:30151	intergenic.NA	6.22022e-05	hyper
chr8	99959181	99962260	shore:20255/island:11054/shore:20256	1to5kb.STK3/CDS.OSR2/5UTR.OSR2/exon.OSR2/intron.OSR2	6.22022e-05	hyper
chr11	44330211	44333860	shore:26040/island:14256/shore:26041/island:14257/shore:26042	promoter.ALX4/1to5kb.ALX4/CDS.ALX4/5UTR.ALX4/exon.ALX4/intron.ALX4	6.22543e-05	hyper
chr19	51169281	51172770	shore:44179/island:24423/shore:44180	CDS.SHANK1/exon.SHANK1/intron.SHANK1	6.39515e-05	hyper
chr11	133824811	133826430	shore:27711/island:15158	intron.IGSF9B	6.42966e-05	hyper
chr11	30605131	30608400	shore:25927/island:14191/shore:25928/island:14192/shore:25929	promoter.MPPED2/1to5kb.MPPED2/5UTR.MPPED2/exon.MPPED2/intron.MPPED2	6.47441e-05	hyper
chr15	95294591	95295160	inter:13932	intergenic.NA	6.50978e-05	hypo
chr7	27157491	27158300	shelf:14710	1to5kb.NA/intron.HOXA3	6.50978e-05	hyper
chr2	206549281	206552160	shore:6926/island:3756/shore:6927	intron.NRP2	6.6756e-05	hyper
chr14	77735921	77738710	shore:31907/island:17446/shore:31908	promoter.NGB/1to5kb.NGB/CDS.NGB/5UTR.NGB/exon.NGB/intron.NGB	6.71639e-05	hyper
chr1	2983631	2985880	shore:381/island:235	promoter.PRDM16/promoter.LINC00982/1to5kb.PRDM16/1to5kb.LINC00982/CDS.PRDM16/CDS.LINC00982/5UTR.PRDM16/5UTR.LINC00982/exon.PRDM16/exon.LINC00982/intron.PRDM16/intron.LINC00982	6.73825e-05	hyper
chr13	112715011	112718160	shore:30821/island:16848/shore:30822/island:16849/shore:30823	1to5kb.SOX1/intergenic.NA	6.74092e-05	hyper
chr20	39318691	39321950	island:25123/shore:45439/island:25124/shore:45440	promoter.MAFB/1to5kb.MAFB	6.80461e-05	hyper
chr13	70681411	70682710	shore:30538/island:16693/shore:30539	promoter.KLHL1/CDS.KLHL1/5UTR.KLHL1/exon.ATXN8OS/exon.KLHL1/intron.ATXN8OS	6.92272e-05	hyper
chr11	49229451	49230920	shore:26173/island:14328/shore:26174	promoter.FOLH1/CDS.FOLH1/5UTR.FOLH1/exon.FOLH1/intron.FOLH1	6.98734e-05	hyper
chr7	145812501	145814430	shore:18568/island:10129/shore:18569	promoter.CNTNAP2/CDS.CNTNAP2/5UTR.CNTNAP2/exon.CNTNAP2/intron.CNTNAP2	6.98734e-05	hyper
chr5	87973661	87974780	shore:12582/island:6842/shore:12583	promoter.LINC00461/1to5kb.LINC00461/exon.LINC00461/intron.LINC00461	6.98734e-05	hyper
chr7	149410361	149412690	shore:18624/island:10158/shore:18625	promoter.KRBA1/1to5kb.KRBA1/5UTR.KRBA1/exon.KRBA1/intron.KRBA1	7.02225e-05	hyper
chr3	185911081	185913100	shore:9628/island:5199/shore:9629	intron.DGKG	7.06636e-05	hyper
chr5	54517391	54519920	shore:12269/island:6674/shore:12270	CDS.MCIDAS/exon.MCIDAS/intron.MCIDAS	7.18301e-05	hyper
chr4	113431571	113432950	shore:11115/island:6029/shore:11116	intergenic.NA	7.18301e-05	hyper
chr10	50322731	50324070	shore:23838/island:13023/shore:23839	promoter.VSTM4/CDS.VSTM4/5UTR.VSTM4/exon.VSTM4/intron.VSTM4	7.29014e-05	hyper
chr13	102067841	102069560	shore:30691/island:16778/shore:30692	promoter.NALCN/5UTR.NALCN/exon.NALCN/intron.NALCN	7.30847e-05	hyper
chr17	42732231	42736080	shore:38122/island:20896/shore:38123	promoter.MEIOC/1to5kb.MEIOC/CDS.MEIOC/5UTR.MEIOC/exon.MEIOC/intron.MEIOC	7.393e-05	hyper
chr19	10023481	10025150	shore:41770/island:23033	intron.OLFM2	7.393e-05	hyper
chr1	246950261	246950650	shore:4497	1to5kb.LINC01341/intron.LINC01341	7.45578e-05	hypo
chr20	643721	645610	shore:44794/island:24772/shore:44795	CDS.SCRT2/exon.SCRT2/intron.SRXN1/intron.SCRT2/3UTR.SCRT2	7.47189e-05	hyper
chr2	237415681	237416980	shore:7368/island:3996/shore:7369	promoter.IQCA1/1to5kb.IQCA1/CDS.IQCA1/5UTR.IQCA1/exon.IQCA1/intron.IQCA1	7.47189e-05	hyper
chr4	185939341	185943030	island:6296/shore:11603	promoter.HELT/CDS.HELT/5UTR.HELT/exon.HELT/intron.HELT/3UTR.HELT/intergenic.NA	7.48348e-05	hyper
chr4	41746681	41750070	shore:10593/island:5749/shore:10594/island:5750/shore:10595	CDS.PHOX2B/exon.PHOX2B/intron.PHOX2B/3UTR.PHOX2B	7.49065e-05	hyper
chr9	129385791	129389570	shore:22334/island:12193/shore:22335	intron.LMX1B	7.5632e-05	hyper
chr1	156818531	156819450	shore:3317/island:1811/shore:3318	CDS.INSRR/exon.INSRR/intron.NTRK1/intron.INSRR	7.58635e-05	hyper
chr1	23495511	23495910	inter:383	promoter.LUZP1/5UTR.LUZP1/exon.LUZP1/intron.LUZP1	7.61031e-05	hypo
chr2	45164281	45165270	shore:5171/island:2801	1to5kb.SIX3	7.62859e-05	hyper
chr20	26188341	26190820	shore:45162/island:24975/shore:45163	promoter.MIR663AHG/promoter.MIR663A/1to5kb.MIR663A/exon.MIR663AHG/exon.MIR663A/intron.MIR663AHG	7.62859e-05	hyper
chr21	36040511	36043430	shore:46394/island:25658/shore:46395	promoter.CLIC6/1to5kb.CLIC6/CDS.CLIC6/exon.CLIC6/intron.CLIC6	7.62859e-05	hyper
chr10	71331251	71333310	shore:24001/island:13107/shore:24002/island:13108	promoter.NEUROG3/promoter.NA/CDS.NEUROG3/CDS.NA/5UTR.NEUROG3/exon.NEUROG3/exon.NA/intron.NEUROG3/3UTR.NEUROG3/intergenic.NA	7.69285e-05	hyper
chr1	58715011	58716570	shore:2136/island:1170/shore:2137	promoter.DAB1/5UTR.DAB1/exon.DAB1/intron.DAB1	7.69285e-05	hyper
chr22	41048191	41048670	inter:18884	intergenic.NA	7.71239e-05	hypo
chr5	1885261	1888320	island:6495/shore:11935	promoter.IRX4/1to5kb.IRX4/5UTR.IRX4/exon.IRX4/intron.IRX4	7.79243e-05	hyper
chr6	150358501	150359720	shore:15813/island:8613/shore:15814	intergenic.NA	7.79243e-05	hyper
chr17	37365821	37366810	shore:37835/island:20737/shore:37836	exon.STAC2/3UTR.STAC2/intergenic.NA	7.79243e-05	hyper
chr17	32964131	32965460	shore:37662/island:20641/shore:37663	CDS.TMEM132E/exon.TMEM132E/intron.TMEM132E/3UTR.TMEM132E	7.92104e-05	hyper
chr13	88323271	88327220	shore:30595/island:16724/shore:30596/island:16725/shore:30597	promoter.SLITRK5/promoter.NA/promoter.MIR4500HG/1to5kb.SLITRK5/1to5kb.NA/1to5kb.MIR4500HG/CDS.NA/5UTR.SLITRK5/5UTR.NA/exon.SLITRK5/exon.NA/intron.SLITRK5/intron.NA	7.95165e-05	hyper
chr2	232790201	232791130	island:3942	promoter.NPPC/CDS.NPPC/5UTR.NPPC/exon.NPPC/intron.NPPC	7.95165e-05	hyper
chr20	622661	623760	shore:44789/island:24769/shore:44790	intergenic.NA	7.97315e-05	hyper
chr7	64029281	64031200	shore:17501/island:9568/shore:17502	1to5kb.LOC100128885/intergenic.NA	8.08778e-05	hyper
chr7	8472901	8475770	shore:16848/island:9203/shore:16849	promoter.NXPH1/CDS.NXPH1/5UTR.NXPH1/exon.NXPH1/intron.NXPH1	8.17986e-05	hyper
chr2	233250961	233253830	shore:7278/island:3948/shore:7279	promoter.ECEL1P2/1to5kb.ECEL1P2/CDS.ECEL1P2/5UTR.ECEL1P2/exon.ECEL1P2/3UTR.ECEL1P2	8.20289e-05	hyper
chr5	158523081	158525220	shore:13422/island:7304/shore:13423	promoter.EBF1/1to5kb.NA/1to5kb.EBF1/CDS.EBF1/5UTR.EBF1/exon.EBF1/intron.EBF1	8.20289e-05	hyper
chr11	94133741	94135210	shore:27220/island:14900/shore:27221	promoter.GPR83/CDS.GPR83/5UTR.GPR83/exon.GPR83/intron.GPR83	8.23061e-05	hyper
chr19	3785361	3786910	shore:41230/island:22709/shore:41231	promoter.MATK/5UTR.MATK/exon.MATK/intron.MATK	8.26397e-05	hyper
chr12	16757631	16758330	inter:11529	promoter.LMO3/CDS.LMO3/5UTR.LMO3/exon.LMO3/intron.LMO3	8.29737e-05	hyper
chr4	111538971	111541240	shore:11095/island:6017/shore:11096/island:6018/shore:11097	CDS.PITX2/exon.PITX2/intron.PITX2/3UTR.PITX2	8.30272e-05	hyper
chr14	57263791	57266240	shore:31542/island:17256/shore:31543	intergenic.NA	8.32613e-05	hyper
chr15	79723771	79725930	shore:33624/island:18365/shore:33625	promoter.MINAR1/1to5kb.MINAR1/5UTR.MINAR1/exon.MINAR1/intron.MINAR1	8.42742e-05	hyper
chr11	88241361	88242850	shore:27168/island:14872/shore:27169	CDS.GRM5/exon.GRM5-AS1/exon.GRM5/intron.GRM5-AS1/intron.GRM5/3UTR.GRM5	8.5869e-05	hyper
chr17	80253711	80254410	shelf:33744	1to5kb.NA	8.5869e-05	hypo
chr1	228651241	228653430	shore:4264/island:2314/shore:4265	promoter.NA/1to5kb.NA/exon.NA/intergenic.NA	8.605e-05	hyper
chr4	156128931	156130500	shore:11415/island:6196/shore:11416	promoter.NPY2R/1to5kb.NPY2R/1to5kb.NA/5UTR.NPY2R/exon.NPY2R/intron.NPY2R	8.77351e-05	hyper
chr1	110609951	110613620	shore:2595/island:1413/shore:2596	promoter.ALX3/CDS.ALX3/5UTR.ALX3/exon.ALX3/intron.ALX3	8.78588e-05	hyper
chr7	19811831	19813600	shore:16905/island:9235/shore:16906	promoter.TMEM196/1to5kb.TMEM196/CDS.TMEM196/5UTR.TMEM196/exon.TMEM196/intron.TMEM196	8.79269e-05	hyper
chr1	242686541	242688960	shore:4428/island:2400/shore:4429/island:2401/shore:4430	promoter.PLD5/CDS.PLD5/5UTR.PLD5/exon.PLD5/intron.PLD5	8.79269e-05	hyper
chr18	904211	909860	shore:39593/island:21722/shore:39594	promoter.ADCYAP1/CDS.ADCYAP1/5UTR.ADCYAP1/exon.ADCYAP1/intron.ADCYAP1/3UTR.ADCYAP1	8.82585e-05	hyper
chr20	61884421	61886940	shore:46020/island:25440/shore:46021	promoter.FLJ16779/promoter.NKAIN4/1to5kb.NKAIN4/CDS.FLJ16779/CDS.NKAIN4/5UTR.FLJ16779/5UTR.NKAIN4/exon.FLJ16779/exon.NKAIN4/intron.NKAIN4/3UTR.FLJ16779	8.94724e-05	hyper
chr11	20622431	20623700	shore:25882/island:14166/shore:25883	CDS.SLC6A5/5UTR.SLC6A5/exon.SLC6A5/intron.SLC6A5	8.98117e-05	hyper
chr16	3232101	3234660	shore:34606/island:18954/shore:34607	promoter.NA/1to5kb.NA/exon.NA	9.03374e-05	hyper
chr22	25677861	25679580	shore:47267/island:26134/shore:47268	promoter.NA/exon.NA/intron.NA	9.04052e-05	hyper
chr8	142315291	142316390	shelf:17817/shore:20546	intergenic.NA	9.04052e-05	hyper
chr4	156587991	156589560	shore:11419/island:6198/shore:11420	promoter.GUCY1A1/5UTR.GUCY1A1/exon.GUCY1A1/intron.GUCY1A1	9.16874e-05	hyper
chr12	79258121	79259230	inter:11879	promoter.SYT1/5UTR.SYT1/exon.SYT1/intron.SYT1	9.16874e-05	hyper
chr9	37001981	37003280	shore:21323/island:11652/shore:21324	promoter.PAX5/CDS.PAX5/5UTR.PAX5/exon.PAX5/intron.PAX5/3UTR.PAX5	9.17664e-05	hyper
chr2	242584841	242585640	inter:3166	intron.ATG4B	9.2426e-05	hyper
chr4	777771	782690	shore:9899/island:5351/shore:9900/shelf:8724	1to5kb.LOC100129917/CDS.CPLX1/exon.CPLX1/intron.CPLX1/3UTR.CPLX1	9.26677e-05	hyper
chr10	43368291	43368610	inter:9730	intergenic.NA	9.32321e-05	hypo
chr13	50706191	50708360	shore:30460/island:16650/shore:30461	intron.DLEU1	9.32918e-05	hyper
chr4	3642271	3642640	shore:10197	intergenic.NA	9.46695e-05	hypo
chr8	72468261	72471500	shore:20020/island:10930/shore:20021	intergenic.NA	9.46695e-05	hyper
chr2	124781921	124783800	shore:6176/island:3343/shore:6177	promoter.CNTNAP5/CDS.CNTNAP5/5UTR.CNTNAP5/exon.CNTNAP5/intron.CNTNAP5	9.69364e-05	hyper
chr20	58179561	58181060	shore:45819/island:25325/shore:45820	promoter.PHACTR3/CDS.PHACTR3/5UTR.PHACTR3/exon.PHACTR3/intron.PHACTR3	9.71566e-05	hyper
chr7	1708661	1711260	island:9003/shore:16499	intergenic.NA	9.77148e-05	hyper
chr6	26720551	26724460	inter:5940	promoter.NA/1to5kb.NA/exon.NA/intergenic.NA	9.82043e-05	hyper
chr2	142211	142950	inter:1878	intergenic.NA	0.000102787	hypo
chr17	33822351	33823910	inter:15284	intron.SLFN12L	0.000103685	hyper
chr20	25057991	25059050	shore:45137/island:24961/shore:45138	CDS.VSX1/exon.VSX1/intron.VSX1	0.00010444	hyper
chr11	57404781	57406400	inter:10741	promoter.NA/1to5kb.NA/1to5kb.MIR130A/exon.NA/intron.NA	0.000105459	hyper
chr7	56182391	56184940	shore:17387/island:9501/shore:17388	promoter.PSPH/promoter.NUPR2/promoter.NA/CDS.PSPH/CDS.NUPR2/CDS.NA/5UTR.PSPH/5UTR.NUPR2/exon.PSPH/exon.NUPR2/exon.NA/intron.PSPH/intron.NUPR2/3UTR.NUPR2	0.00010586	hyper
chr13	112707421	112709020	shore:30819/island:16846/shore:30820	intergenic.NA	0.000108521	hyper
chr11	123300821	123302460	shore:27556/island:15074/shore:27557	intergenic.NA	0.000108628	hyper
chr11	111382821	111384190	shore:27321/island:14952/shore:27322	promoter.MIR34B/promoter.MIR34C/promoter.BTG4/1to5kb.MIR34C/1to5kb.C11orf88/1to5kb.BTG4/5UTR.BTG4/exon.NA/exon.MIR34B/exon.MIR34C/exon.BTG4/intron.NA/intron.BTG4	0.000111267	hyper
chr19	23252471	23254650	shore:42714/island:23568/shore:42715/island:23569/shore:42716	intergenic.NA	0.000113503	hyper
chr3	147074691	147075450	shelf:8178/shore:9281	intergenic.NA	0.000114886	hyper
chr6	118227781	118230100	shore:15541/island:8469/shore:15542	promoter.SLC35F1/CDS.SLC35F1/5UTR.SLC35F1/exon.SLC35F1/intron.SLC35F1	0.000115477	hyper
chr20	2780111	2781710	shore:44873/island:24814/shore:44874	promoter.CPXM1/CDS.CPXM1/5UTR.CPXM1/exon.CPXM1/intron.CPXM1	0.000115685	hyper
chr16	73266931	73267280	inter:14657	intergenic.NA	0.000115685	hypo
chr12	45443631	45445680	shore:28265/island:15449/shore:28266	promoter.DBX2/CDS.DBX2/5UTR.DBX2/exon.DBX2/intron.DBX2	0.000115801	hyper
chr4	1163871	1166440	shore:9977/island:5402	promoter.SPON2/1to5kb.SPON2/CDS.SPON2/5UTR.SPON2/exon.SPON2/intron.SPON2/3UTR.SPON2	0.000115801	hyper
chr10	118898941	118901010	shore:24767/island:13526/shore:24768	1to5kb.VAX1	0.000116493	hyper
chr19	8656181	8658150	shore:41715/island:23004/shore:41716	promoter.ADAMTS10/1to5kb.ADAMTS10/CDS.ADAMTS10/5UTR.ADAMTS10/exon.ADAMTS10/intron.ADAMTS10	0.000118223	hyper
chr1	91299881	91302220	shore:2402/island:1314/shore:2403	promoter.NA/exon.NA/intron.NA	0.000119207	hyper
chr6	11043571	11045580	shore:14106/island:7691/shore:14107	promoter.ELOVL2-AS1/promoter.ELOVL2/1to5kb.ELOVL2-AS1/CDS.ELOVL2/5UTR.ELOVL2/exon.ELOVL2-AS1/exon.ELOVL2/intron.ELOVL2-AS1/intron.ELOVL2	0.000122434	hyper
chr18	70208691	70212100	shore:40207/island:22042/shore:40208	promoter.CBLN2/1to5kb.CBLN2/CDS.CBLN2/5UTR.CBLN2/exon.CBLN2/intron.CBLN2	0.000124622	hyper
chr3	117715381	117716720	shore:8820/island:4775/shore:8821	intergenic.NA	0.0001251	hyper
chr10	101289411	101292020	shore:24433/island:13335/shore:24434/island:13336/shore:24435	promoter.NKX2-3/promoter.NA/1to5kb.NKX2-3/1to5kb.NA/exon.NA/intron.NA	0.000125153	hyper
chr2	45159091	45162350	shore:5169/island:2799/shore:5170/island:2800	intergenic.NA	0.000126244	hyper
chr10	128992751	128995590	shore:24934/island:13616/shore:24935	promoter.INSYN2/1to5kb.INSYN2/5UTR.INSYN2/exon.INSYN2/intron.DOCK1/intron.INSYN2	0.000127337	hyper
chr9	104499071	104500760	shore:22006/island:12015	CDS.GRIN3A/5UTR.GRIN3A/exon.GRIN3A/intron.GRIN3A	0.000129226	hyper
chr12	113494131	113496510	shore:29283/island:15995/shore:29284	promoter.DTX1/1to5kb.DTX1/CDS.DTX1/5UTR.DTX1/exon.DTX1/intron.DTX1	0.000130026	hyper
chr20	58151891	58153290	shore:45817/island:25324/shore:45818	promoter.PHACTR3/CDS.PHACTR3/exon.PHACTR3/intron.PHACTR3	0.000130058	hyper
chr2	172971381	172973560	island:3586/shore:6625/island:3587/shore:6626	1to5kb.DLX2/intergenic.NA	0.000131114	hyper
chr3	27772421	27773150	shore:7941	intergenic.NA	0.000132754	hyper
chr11	122851631	122852810	shore:27544/island:15067/shore:27545	promoter.BSX/CDS.BSX/exon.BSX/intron.BSX	0.000134219	hyper
chr1	91188851	91193070	shore:2399/island:1312/shore:2400/island:1313/shore:2401	intergenic.NA	0.000134219	hyper
chr14	42075161	42077990	shore:31406/island:17186/shore:31407	promoter.LRFN5/1to5kb.LRFN5/5UTR.LRFN5/exon.LRFN5/intron.LRFN5	0.000134439	hyper
chr7	128555361	128556950	island:10032/shore:18382	1to5kb.KCP/intergenic.NA	0.00013706	hyper
chr7	156812641	156814100	island:10297	intergenic.NA	0.000140334	hyper
chr10	133998521	134001660	shore:25030/island:13668/shore:25031	promoter.DPYSL4/1to5kb.DPYSL4/CDS.DPYSL4/5UTR.DPYSL4/exon.DPYSL4/intron.DPYSL4	0.000140776	hyper
chr13	100649061	100651200	shore:30681/island:16773/shore:30682	intergenic.NA	0.000140776	hyper
chr8	57357821	57361100	shore:19891/island:10860/shore:19892/island:10861/shore:19893/island:10862/shore:19894	promoter.NA/promoter.PENK/1to5kb.PENK/CDS.PENK/5UTR.PENK/exon.NA/exon.PENK/intron.NA/intron.PENK/3UTR.PENK	0.000140776	hyper
chr11	20180291	20183250	shore:25874/island:14161/shore:25875	promoter.DBX1/1to5kb.DBX1/CDS.DBX1/5UTR.DBX1/exon.DBX1/intron.DBX1	0.000141413	hyper
chr22	32571661	32573390	shore:47437/island:26224/shore:47438	intergenic.NA	0.000141465	hyper
chr1	36042031	36044290	shore:1564/island:869/shore:1565	CDS.PSMB2/exon.PSMB2/intron.TFAP2E/intron.PSMB2/3UTR.PSMB2	0.000142191	hyper
chr17	32483201	32484560	shore:37655/island:20637/shore:37656	promoter.ASIC2/CDS.ASIC2/5UTR.ASIC2/exon.ASIC2	0.00014227	hyper
chr21	34394681	34400750	shore:46357/island:25639/shore:46358	promoter.OLIG2/promoter.NA/1to5kb.OLIG2/1to5kb.NA/CDS.OLIG2/CDS.NA/5UTR.OLIG2/exon.OLIG2/exon.NA/intron.OLIG2/3UTR.OLIG2	0.000143167	hyper
chr18	12253221	12255720	shore:39725/island:21792/shore:39726	promoter.CIDEA/1to5kb.CIDEA/CDS.CIDEA/5UTR.CIDEA/exon.CIDEA/intron.CIDEA	0.000143167	hyper
chr13	95356731	95358150	shore:30616/island:16736/shore:30617	intergenic.NA	0.000143167	hyper
chr11	63765571	63769110	shore:26420/island:14460/shore:26421	CDS.MACROD1/exon.OTUB1/exon.MACROD1/intron.MACROD1/3UTR.OTUB1/3UTR.MACROD1/intergenic.NA	0.000143167	hyper
chr4	48485161	48486810	shore:10649/island:5781/shore:10650	promoter.SLC10A4/CDS.SLC10A4/5UTR.SLC10A4/exon.SLC10A4/intron.SLC10A4	0.000143867	hyper
chr17	47547031	47548180	shore:38377/island:21042/shore:38378	intergenic.NA	0.000145312	hyper
chr8	80523101	80523740	shore:20071	CDS.STMN2/5UTR.STMN2/exon.STMN2/intron.STMN2	0.000145552	hyper
chr4	158141151	158142220	shore:11429/island:6203/shore:11430	promoter.GRIA2/1to5kb.GRIA2/CDS.GRIA2/5UTR.GRIA2/exon.GRIA2/intron.GRIA2	0.000145572	hyper
chr2	127413261	127415280	shore:6178/island:3344/shore:6179	promoter.GYPC/CDS.GYPC/5UTR.GYPC/exon.GYPC/intron.GYPC	0.000145781	hyper
chr3	125075621	125077210	shore:8922/island:4827/shore:8923	intron.ZNF148	0.000147143	hyper
chr20	37351431	37358420	shore:45421/island:25113/shore:45422	promoter.SLC32A1/1to5kb.SLC32A1/CDS.SLC32A1/5UTR.SLC32A1/exon.SLC32A1/intron.SLC32A1/3UTR.SLC32A1/intergenic.NA	0.000148496	hyper
chr9	100619661	100621000	shore:21941/island:11981/shore:21942	intergenic.NA	0.000148586	hyper
chr3	142680821	142684220	shore:9265/island:5008/shore:9266	promoter.NA/promoter.PAQR9/1to5kb.NA/1to5kb.PAQR9/CDS.PAQR9/exon.NA/exon.PAQR9/intron.NA/3UTR.PAQR9	0.000149423	hyper
chr22	18945661	18946120	inter:18582	intergenic.NA	0.000149423	hypo
chr7	6703251	6704510	shore:16822/island:9190/shore:16823	promoter.NA/exon.NA/intron.NA	0.000149715	hyper
chr8	75896231	75897430	shore:20056/island:10949/shore:20057	promoter.CRISPLD1/5UTR.CRISPLD1/exon.CRISPLD1/intron.CRISPLD1	0.000150226	hyper
chr13	95362891	95366300	shore:30618/island:16738/shore:30619	promoter.NA/promoter.SOX21/1to5kb.NA/1to5kb.SOX21/CDS.SOX21/5UTR.SOX21/exon.NA/exon.SOX21/intron.NA/3UTR.SOX21	0.000150569	hyper
chr10	22633761	22635180	shore:23493/island:12845/shore:23494	promoter.SPAG6/CDS.SPAG6/5UTR.SPAG6/exon.SPAG6/intron.SPAG6	0.000151937	hyper
chr2	238863921	238865630	shore:7390/island:4007/shore:7391	intergenic.NA	0.000151937	hyper
chr12	117470471	117471610	inter:12065	intergenic.NA	0.000152789	hyper
chr15	30212651	30212920	inter:13400	intergenic.NA	0.000152961	hypo
chr7	96626571	96627450	inter:7387/shelf:15512	intron.DLX6-AS1	0.00015398	hyper
chr1	147485201	147487930	shore:2894/island:1575/shore:2895/island:1576/shore:2896	promoter.NA/1to5kb.NA	0.00015398	hyper
chr13	50193651	50194760	inter:12493	intergenic.NA	0.00015398	hypo
chr19	4800591	4801070	inter:16555	intergenic.NA	0.000154396	hypo
chr7	86273741	86274940	inter:7343	CDS.GRM3/5UTR.GRM3/exon.GRM3/intron.GRM3	0.000154396	hyper
chr6	5998911	6000870	shore:14023/island:7641/shore:14024	CDS.NRN1/exon.NRN1/intron.NRN1/3UTR.NRN1	0.000154632	hyper
chr4	166794261	166796470	shore:11468/island:6223/shore:11469	promoter.TLL1/CDS.TLL1/5UTR.TLL1/exon.TLL1/intron.TLL1	0.000154798	hyper
chr3	147124871	147131630	shelf:8182/shore:9287/island:5020/shore:9288/island:5021/shore:9289/island:5022/shore:9290	promoter.ZIC1/promoter.ZIC4/1to5kb.ZIC1/1to5kb.ZIC4/CDS.ZIC1/5UTR.ZIC1/exon.ZIC1/intron.ZIC1/3UTR.ZIC1	0.000158377	hyper
chr8	49782371	49784030	shore:19825/island:10825/shore:19826	intergenic.NA	0.000158854	hyper
chr13	20715851	20717850	shore:30036/island:16422/shore:30037	promoter.NA/CDS.GJA3/CDS.NA/5UTR.GJA3/exon.GJA3/exon.NA/intron.GJA3/3UTR.GJA3	0.000159296	hyper
chr11	24517971	24519050	shore:25902/island:14176/shore:25903	promoter.LUZP2/CDS.LUZP2/5UTR.LUZP2/exon.LUZP2/intron.LUZP2	0.000159867	hyper
chr6	36806631	36807440	shore:14771/island:8052/shore:14772	promoter.CPNE5/CDS.CPNE5/5UTR.CPNE5/exon.CPNE5/intron.CPNE5	0.000162319	hyper
chr11	89596751	89599120	shore:27177/island:14877/shore:27178/island:14878/shore:27179	intergenic.NA	0.000163337	hyper
chr19	51829691	51831560	shore:44225/island:24449/shore:44226	CDS.IGLON5/exon.IGLON5/intron.IGLON5	0.000163447	hyper
chr5	175084671	175086030	shore:13583/island:7395/shore:13584	promoter.HRH2/5UTR.HRH2/exon.HRH2/intron.HRH2	0.000164843	hyper
chr9	34809311	34810590	shore:21247/island:11613/shore:21248	intergenic.NA	0.000166324	hyper
chr3	6901871	6904930	shore:7676/island:4168/shore:7677/island:4169/shore:7678	promoter.GRM7/CDS.GRM7/5UTR.GRM7/exon.GRM7/intron.GRM7	0.000166576	hyper
chr5	80689231	80690480	shore:12549/island:6823/shore:12550	promoter.ACOT12/CDS.ACOT12/5UTR.ACOT12/exon.ACOT12/intron.RNU5E-1/intron.ACOT12	0.000166576	hyper
chr6	10881201	10884880	shore:14101/island:7688/shore:14102/island:7689/shore:14103	promoter.GCM2/1to5kb.SYCP2L/1to5kb.GCM2/CDS.GCM2/5UTR.GCM2/exon.GCM2/intron.SYCP2L/intron.GCM2	0.000167258	hyper
chr2	29337621	29339240	shore:5031/island:2726/shore:5032	promoter.CLIP4/1to5kb.CLIP4/5UTR.CLIP4/exon.CLIP4/intron.CLIP4	0.000167258	hyper
chr1	13909331	13911260	shore:791/island:460/shore:792/island:461/shore:793	promoter.PDPN/1to5kb.PDPN/CDS.PDPN/5UTR.PDPN/exon.PDPN/intron.PDPN	0.000168774	hyper
chr8	59057891	59060060	shore:19910/island:10871/shore:19911	promoter.NA/CDS.FAM110B/CDS.NA/5UTR.FAM110B/exon.FAM110B/exon.NA/intron.FAM110B/3UTR.FAM110B	0.000169751	hyper
chr2	220299131	220300340	shore:7119/island:3859/shore:7120	promoter.SPEG/1to5kb.SPEG/CDS.SPEG/exon.SPEG/intron.SPEG	0.000171076	hyper
chr10	103999931	104001080	shore:24584/island:13428	1to5kb.GBF1/1to5kb.NA/intron.PITX3	0.000172077	hyper
chr20	21081511	21083170	island:24928/shore:45084	intergenic.NA	0.000172096	hyper
chr1	149398531	149399570	shore:2985/island:1630/shore:2986	promoter.NA/exon.NA/intergenic.NA	0.00017214	hyper
chr2	182547031	182550300	shore:6757/island:3669/shore:6758	1to5kb.CERKL/1to5kb.NEUROD1/1to5kb.NA	0.000173303	hyper
chr10	26503511	26507720	shore:23526/island:12864/shore:23527	promoter.GAD2/1to5kb.GAD2/CDS.GAD2/5UTR.GAD2/exon.GAD2/intron.GAD2	0.000173519	hyper
chr7	4922421	4923700	shore:16676/island:9106/shore:16677	promoter.RADIL/5UTR.RADIL/exon.RADIL/intron.RADIL	0.000173519	hyper
chr12	114881361	114883650	shore:29327/island:16022/shore:29328	intergenic.NA	0.000174315	hyper
chr4	66534821	66536870	shore:10761/island:5840/shore:10762/island:5841/shore:10763	promoter.EPHA5-AS1/promoter.EPHA5/1to5kb.EPHA5/CDS.EPHA5/5UTR.EPHA5/exon.EPHA5-AS1/exon.EPHA5/intron.EPHA5-AS1/intron.EPHA5	0.000174948	hyper
chr16	20084311	20086130	shore:34963/island:19155/shore:34964	promoter.GPR139/1to5kb.GPR139/CDS.GPR139/5UTR.GPR139/exon.GPR139/intron.GPR139	0.00017575	hyper
chr3	133392781	133394160	shore:9115/island:4927/shore:9116	intergenic.NA	0.000176275	hyper
chr20	4802831	4804460	shore:44955/island:24859/shore:44956	promoter.RASSF2/5UTR.RASSF2/exon.RASSF2/intron.RASSF2	0.00017661	hyper
chr4	3651271	3651580	inter:4263	intergenic.NA	0.000178056	hypo
chr6	161351761	161352700	shore:15949/island:8682/shore:15950	intergenic.NA	0.000181487	hyper
chr1	13839211	13840530	shore:787/island:458	promoter.LRRC38/CDS.LRRC38/5UTR.LRRC38/exon.LRRC38/intron.LRRC38	0.000182873	hyper
chr12	127939701	127941230	shore:29684/island:16216/shore:29685	intergenic.NA	0.000184943	hyper
chr2	105469391	105473760	island:3195/shore:5908	promoter.POU3F3/1to5kb.POU3F3/1to5kb.PANTR1/CDS.POU3F3/exon.POU3F3/intergenic.NA	0.000184943	hyper
chr10	103043701	103044650	shore:24544/island:13405/shore:24545	intergenic.NA	0.000185014	hyper
chr5	168726651	168728870	shore:13476/island:7334/shore:13477	promoter.SLIT3/CDS.SLIT3/5UTR.SLIT3/exon.SLIT3/intron.SLIT3	0.000186576	hyper
chr2	213400971	213404050	shore:6989/island:3788/shore:6990	promoter.ERBB4/CDS.ERBB4/5UTR.ERBB4/exon.ERBB4/intron.ERBB4	0.000186788	hyper
chr13	93878941	93881220	shore:30607/island:16731/shore:30608	promoter.GPC6/CDS.GPC6/5UTR.GPC6/exon.GPC6/intron.GPC6	0.00018953	hyper
chr13	37003671	37007350	shore:30312/island:16571/shore:30313	promoter.CCNA1/1to5kb.CCNA1/CDS.CCNA1/5UTR.CCNA1/exon.CCNA1/intron.CCNA1	0.00019084	hyper
chr2	133425861	133429170	shore:6388/island:3456/shore:6389	promoter.LYPD1/1to5kb.LYPD1/CDS.LYPD1/5UTR.LYPD1/exon.LYPD1/intron.LYPD1	0.000192147	hyper
chr14	102029651	102031870	island:17605/shore:32208	1to5kb.NA/1to5kb.MIR1247/exon.DIO3/3UTR.DIO3/intergenic.NA	0.000193185	hyper
chr9	37037281	37038700	island:11656/shore:21329	1to5kb.PAX5	0.00019466	hyper
chr3	137485931	137491290	shore:9164/island:4954/shore:9165/island:4955/shore:9166/island:4956/shore:9167	1to5kb.NA/intergenic.NA	0.000195743	hyper
chr9	29211641	29215530	shore:21156/island:11564/shore:21157/island:11565/shore:21158	promoter.LINGO2/1to5kb.LINGO2/5UTR.LINGO2/exon.LINGO2/intron.LINGO2	0.000195744	hyper
chr7	155254741	155255620	shore:18803/island:10263/shore:18804	CDS.EN2/exon.EN2/intron.EN2/3UTR.EN2	0.00019801	hyper
chr5	56077781	56078190	inter:5136	intergenic.NA	0.00019801	hypo
chr2	145273161	145275560	shore:6433/island:3479/shore:6434	promoter.NA/promoter.ZEB2/1to5kb.NA/1to5kb.ZEB2-AS1/CDS.ZEB2/5UTR.ZEB2/exon.ZEB2/intron.ZEB2	0.00019801	hyper
chr8	89338871	89341170	shore:20160/island:11003/shore:20161	promoter.MMP16/1to5kb.MMP16/CDS.MMP16/5UTR.MMP16/exon.MMP16/intron.MMP16	0.00019837	hyper
chr18	73627671	73629100	shore:40235/island:22057/shore:40236	intergenic.NA	0.000199089	hyper
chr2	31805031	31807260	shore:5045/island:2733/shore:5046/island:2734/shore:5047	promoter.SRD5A2/1to5kb.SRD5A2/CDS.SRD5A2/5UTR.SRD5A2/exon.SRD5A2/intron.SRD5A2	0.000199377	hyper
chr17	76932131	76932400	inter:15863	intergenic.NA	0.00020337	hypo
chr9	79633091	79636590	shore:21645/island:11823/shore:21646	promoter.FOXB2/1to5kb.FOXB2/CDS.FOXB2/exon.FOXB2/intergenic.NA	0.000204156	hyper
chr14	60975181	60978510	shore:31602/island:17288/shore:31603	promoter.SIX6/CDS.SIX6/5UTR.SIX6/exon.SIX6/intron.SIX6/3UTR.SIX6	0.000204652	hyper
chr16	55512571	55513830	shore:35604/island:19498/shore:35605	promoter.MMP2/1to5kb.MMP2/CDS.MMP2/5UTR.MMP2/exon.MMP2/intron.MMP2	0.000207781	hyper
chr9	137978511	137981830	shore:22786/island:12434/shore:22787/island:12435/shore:22788	promoter.OLFM1/1to5kb.OLFM1/CDS.OLFM1/5UTR.OLFM1/exon.OLFM1/intron.OLFM1	0.000210445	hyper
chr13	43147961	43149590	shore:30370/island:16602/shore:30371	promoter.TNFSF11/CDS.TNFSF11/5UTR.TNFSF11/exon.TNFSF11/intron.TNFSF11	0.000211357	hyper
chr16	10133141	10133830	inter:14152	intron.GRIN2A	0.000213793	hyper
chr12	52400191	52402000	shore:28469/island:15558/shore:28470	promoter.GRASP/1to5kb.GRASP/CDS.GRASP/5UTR.GRASP/exon.GRASP/intron.GRASP	0.000214592	hyper
chr22	19135881	19139140	shore:46977/island:25979/shore:46978	promoter.GSC2/1to5kb.ESS2/1to5kb.GSC2/CDS.GSC2/exon.GSC2/intron.GSC2	0.000215718	hyper
chr8	41753121	41755490	shore:19747/island:10783/shore:19748	promoter.ANK1/1to5kb.ANK1/CDS.ANK1/5UTR.ANK1/exon.ANK1/intron.ANK1	0.00021984	hyper
chr20	3217951	3219330	shore:44905/island:24833	promoter.SLC4A11/CDS.SLC4A11/5UTR.SLC4A11/exon.SLC4A11/intron.SLC4A11	0.000221577	hyper
chr9	129485291	129486530	island:12198/shore:22345	intergenic.NA	0.000221892	hyper
chr1	207818031	207819610	shore:3915/island:2122/shore:3916	promoter.CR1L/CDS.CR1L/5UTR.CR1L/exon.CR1L/intron.CR1L	0.000222446	hyper
chr10	57387171	57388740	shore:23899/island:13055/shore:23900	promoter.PCDH15/1to5kb.PCDH15/5UTR.PCDH15/exon.PCDH15/intron.PCDH15	0.000225046	hyper
chr1	1469901	1481320	shore:169/island:109/shore:170/island:110/shore:171/island:111/shore:172/island:112/shore:173/shelf:92/inter:32	promoter.TMEM240/1to5kb.TMEM240/CDS.TMEM240/CDS.SSU72/5UTR.TMEM240/exon.ATAD3A/exon.NA/exon.TMEM240/exon.SSU72/intron.TMEM240/intron.SSU72/3UTR.ATAD3A/3UTR.TMEM240/3UTR.SSU72/intergenic.NA	0.000225332	hyper
chr15	89920511	89923140	shore:33792/island:18452/shore:33793	promoter.MIR9-3HG/exon.MIR9-3HG/intron.MIR9-3HG	0.000225528	hyper
chr17	74069301	74073850	shore:38943/island:21347/shore:38944	promoter.GALR2/promoter.SRP68/1to5kb.GALR2/1to5kb.ZACN/1to5kb.SRP68/CDS.GALR2/5UTR.GALR2/exon.GALR2/intron.GALR2/3UTR.GALR2	0.000226408	hyper
chr8	10261721	10262620	shore:19322/island:10557/shore:19323	intron.MSRA	0.00022692	hypo
chr13	36044551	36046440	shore:30297/island:16562/shore:30298/island:16563/shore:30299	promoter.NBEA/1to5kb.NBEA/5UTR.NBEA/exon.NBEA/intron.NBEA	0.000227051	hyper
chr10	102483511	102484830	shore:24486/island:13367/shore:24487	intergenic.NA	0.000227159	hyper
chr10	22764461	22767370	shore:23497/island:12847/shore:23498	intergenic.NA	0.000227159	hyper
chr17	8905981	8908290	shore:37145/island:20364/shore:37146	intergenic.NA	0.000228479	hyper
chr8	57025261	57026840	shore:19880/island:10854/shore:19881	promoter.MOS/CDS.MOS/exon.MOS/intergenic.NA	0.000228479	hyper
chr1	18433941	18435090	shore:956/island:548/shore:957	promoter.IGSF21/CDS.IGSF21/5UTR.IGSF21/exon.IGSF21/intron.IGSF21	0.000231864	hyper
chr1	149399641	149400830	shore:2986/island:1631/shore:2987	promoter.NA/1to5kb.NA/exon.NA	0.000232829	hyper
chr19	21657281	21658740	shore:42666/island:23544/shore:42667	intergenic.NA	0.000234744	hyper
chr12	108236641	108240090	shore:29167/island:15933/shore:29168	intergenic.NA	0.000237522	hyper
chr9	140770991	140773970	shore:23145/island:12658/shore:23146	promoter.CACNA1B/1to5kb.CACNA1B/CDS.CACNA1B/5UTR.CACNA1B/exon.CACNA1B/intron.CACNA1B/intron.NA	0.000237671	hyper
chr14	96341941	96343900	shore:32091/island:17543/shore:32092	promoter.TUNAR/1to5kb.TUNAR/exon.TUNAR/intron.TUNAR	0.000238761	hyper
chr9	34622641	34625070	shore:21234/island:11606/shore:21235/island:11607/shore:21236	1to5kb.DCTN3/CDS.ARID3C/exon.ARID3C/intron.ARID3C	0.000239277	hyper
chr1	63795131	63796430	shore:2185/island:1196/shore:2186	1to5kb.NA	0.000239277	hyper
chr17	42635021	42637100	island:20895/shore:38121	CDS.FZD2/5UTR.FZD2/exon.FZD2/3UTR.FZD2	0.000239277	hyper
chr22	19016551	19018160	shore:46970/island:25975/shore:46971	intron.DGCR5	0.000242632	hyper
chr12	131781811	131784920	shore:29768/island:16260/shore:29769	promoter.NA/1to5kb.NA/5UTR.NA/exon.NA/intron.NA	0.000243475	hyper
chr14	101922811	101926260	shore:32203/island:17603/shore:32204	intergenic.NA	0.000243475	hyper
chr11	89711731	89714090	shore:27184/island:14881/shore:27185/island:14882/shore:27186	intergenic.NA	0.000243475	hyper
chr19	37095411	37096940	shore:43044/island:23757/shore:43045	promoter.ZNF382/promoter.ZNF529/1to5kb.ZNF382/5UTR.ZNF382/5UTR.ZNF529/exon.ZNF382/exon.ZNF529/intron.ZNF382/intron.ZNF529	0.000245428	hyper
chr22	38477641	38479600	island:26288/shore:47564	promoter.SLC16A8/CDS.SLC16A8/5UTR.SLC16A8/exon.SLC16A8/intron.SLC16A8	0.000246844	hyper
chr19	52956421	52957510	shore:44280/island:24480/shore:44281	promoter.ZNF578/5UTR.ZNF578/exon.ZNF578/intron.ZNF578	0.000249166	hyper
chr6	96462971	96464430	shore:15307/island:8336/shore:15308	promoter.FUT9/5UTR.FUT9/exon.FUT9/intron.FUT9	0.00024929	hyper
chr14	58331381	58333420	shore:31554/island:17263/shore:31555	promoter.SLC35F4/CDS.SLC35F4/5UTR.SLC35F4/exon.SLC35F4/intron.SLC35F4	0.000249899	hyper
chr2	193058751	193061090	shore:6820/island:3701/shore:6821	promoter.TMEFF2/1to5kb.TMEFF2/CDS.TMEFF2/5UTR.TMEFF2/exon.TMEFF2/intron.TMEFF2	0.0002509	hyper
chr13	26041431	26043800	shore:30174/island:16493/shore:30175	promoter.ATP8A2/1to5kb.ATP8A2/CDS.ATP8A2/5UTR.ATP8A2/exon.ATP8A2/intron.ATP8A2	0.000254225	hyper
chr22	28409521	28410590	inter:18727	CDS.TTC28/exon.TTC28/intron.TTC28	0.000256008	hypo
chr15	32638091	32639750	shore:32770/island:17916/shore:32771	1to5kb.NA	0.000256887	hyper
chr9	133027481	133028880	shore:22560/island:12312/shore:22561	intergenic.NA	0.000256887	hyper
chr15	100345811	100347850	shore:33983/island:18556/shore:33984	promoter.NA/promoter.DNM1P46/1to5kb.NA/5UTR.DNM1P46/exon.DNM1P46/intron.DNM1P46	0.000256887	hyper
chr3	62363751	62365300	shore:8551/island:4638/shore:8552	1to5kb.FEZF2/intergenic.NA	0.000258872	hyper
chr1	50880621	50885620	shore:2001/island:1098/shore:2002/island:1099/shore:2003/island:1100/shore:2004/island:1101/shore:2005/island:1102	CDS.DMRTA2/exon.DMRTA2/intron.DMRTA2/3UTR.DMRTA2/intergenic.NA	0.000259661	hyper
chr8	105235121	105236420	shore:20323/island:11090/shore:20324	intron.RIMS2	0.000260068	hyper
chr7	100945391	100947140	inter:7458	1to5kb.NA/intergenic.NA	0.000266195	hyper
chr14	85995401	85998950	shore:31947/island:17466/shore:31948/island:17467/shore:31949	promoter.FLRT2/promoter.NA/1to5kb.FLRT2/1to5kb.NA/5UTR.FLRT2/exon.FLRT2/exon.NA/intron.FLRT2	0.00026712	hyper
chr7	153748091	153750770	shore:18771/island:10244/shore:18772	promoter.DPP6/1to5kb.DPP6/CDS.DPP6/5UTR.DPP6/exon.DPP6/intron.DPP6	0.000271834	hyper
chr10	28032561	28036040	island:12880/shore:23557	promoter.MKX/1to5kb.MKX/5UTR.MKX/exon.MKX/intron.MKX	0.000271893	hyper
chr7	27149611	27150720	shore:17007/island:9291/shore:17008	CDS.HOXA3/5UTR.HOXA3/exon.HOXA3/intron.HOXA3	0.000271954	hyper
chr9	96710501	96712180	shore:21826/island:11917/shore:21827	intergenic.NA	0.0002741	hyper
chr19	1725071	1726450	shore:40856/island:22469/shore:40857	intergenic.NA	0.000274777	hyper
chr2	135475131	135477460	shore:6400/island:3462/shore:6401	promoter.TMEM163/CDS.TMEM163/5UTR.TMEM163/exon.TMEM163/intron.TMEM163	0.000277797	hyper
chr3	75667451	75669320	shore:8641/island:4684/shore:8642	intergenic.NA	0.000279376	hyper
chr7	154861701	154863570	shore:18785/island:10251/shore:18786/island:10252/shore:18787	promoter.HTR5A/promoter.HTR5A-AS1/CDS.HTR5A/CDS.HTR5A-AS1/5UTR.HTR5A/5UTR.HTR5A-AS1/exon.HTR5A/exon.HTR5A-AS1/intron.HTR5A/intron.HTR5A-AS1	0.000286764	hyper
chr2	20869041	20872580	shore:4855/island:2632/shore:4856	CDS.GDF7/exon.GDF7/intron.GDF7/3UTR.GDF7/intergenic.NA	0.000286764	hyper
chr4	158142411	158144380	shore:11430/island:6204/shore:11431	CDS.GRIA2/5UTR.GRIA2/exon.GRIA2/intron.GRIA2	0.000286764	hyper
chr22	20267221	20268180	inter:18611	intergenic.NA	0.000287334	hypo
chr7	156870541	156871570	shore:18866/island:10299/shore:18867	intergenic.NA	0.000287958	hyper
chr20	45588061	45588500	inter:18076	intron.EYA2	0.000293055	hypo
chr16	15527771	15529160	shore:34884/island:19109/shore:34885	promoter.C16orf45/CDS.C16orf45/5UTR.C16orf45/exon.C16orf45/intron.C16orf45	0.000293379	hyper
chr9	102586931	102588400	island:11998/shore:21975	1to5kb.NA/5UTR.NR4A3/exon.NR4A3/intron.NR4A3	0.000294172	hyper
chr18	71839931	71841700	inter:16285	intergenic.NA	0.000294589	hypo
chr7	157092481	157093830	shore:18872/island:10302/shore:18873	intergenic.NA	0.000299873	hypo
chr20	21685251	21688010	shore:45099/island:24938/shore:45100	promoter.PAX1/1to5kb.PAX1/CDS.PAX1/5UTR.PAX1/exon.PAX1/intron.PAX1	0.000300826	hyper
chr21	46128631	46129970	shore:46678/island:25812/shore:46679	intron.TSPEAR	0.000300826	hyper
chr4	183368991	183370680	shore:11551/island:6269/shore:11552	intron.TENM3	0.00030173	hyper
chr17	80331851	80334090	shore:39441/island:21631/shore:39442	promoter.UTS2R/CDS.UTS2R/exon.UTS2R/intergenic.NA	0.000304431	hyper
chr17	20423991	20424500	inter:15164	exon.NA/intron.NA	0.000311534	hypo
chr14	57283151	57284760	shore:31548/island:17260/shore:31549	intron.OTX2-AS1	0.000312807	hyper
chr2	208988531	208989660	shore:6960/island:3773/shore:6961	promoter.CRYGD/CDS.CRYGD/5UTR.CRYGD/exon.CRYGD/intron.LOC100507443/intron.CRYGD	0.000313008	hyper
chr10	102995881	102997660	shore:24542/island:13404/shore:24543	intron.LBX1-AS1	0.000313008	hyper
chr19	54444991	54446430	shore:44376/island:24532/shore:44377	CDS.CACNG7/exon.CACNG7/intron.CACNG7/3UTR.CACNG7	0.000314942	hyper
chr11	71954031	71956550	shore:26939/island:14753/shore:26940	promoter.PHOX2A/1to5kb.PHOX2A/CDS.PHOX2A/5UTR.PHOX2A/exon.PHOX2A/intron.PHOX2A	0.000314942	hyper
chr12	114837401	114839160	shore:29319/island:16016/shore:29320	CDS.TBX5/exon.TBX5/intron.TBX5	0.000319423	hyper
chr5	135265021	135267200	shore:12950/island:7039/shore:12951	promoter.FBXL21/5UTR.FBXL21/exon.FBXL21/intron.FBXL21	0.000321997	hyper
chr8	116660201	116661060	shore:20364/island:11111/shore:20365	intron.TRPS1	0.000321997	hyper
chr4	4862811	4865200	shore:10239/island:5557/shore:10240	CDS.MSX1/exon.MSX1/intron.MSX1/3UTR.MSX1	0.00032344	hyper
chr22	19745791	19746690	shore:47008/island:25997/shore:47009	intron.TBX1	0.000324097	hyper
chr2	42719461	42721290	shore:5132/island:2779	promoter.MTA3/promoter.KCNG3/1to5kb.MTA3/CDS.KCNG3/5UTR.KCNG3/exon.KCNG3/intron.KCNG3	0.000325153	hyper
chr6	108491721	108493070	shore:15433	CDS.NR2E1/exon.NR2E1/intron.NR2E1	0.000325324	hyper
chr2	132088331	132089260	inter:2649	intron.PLEKHB2	0.000327643	hyper
chr1	117900721	117901520	inter:1092	intergenic.NA	0.000331192	hypo
chr9	99982931	99985250	shore:21920/island:11969/shore:21921	intron.NA	0.000332238	hyper
chr20	21488091	21497440	island:24935/shore:45095	promoter.NKX2-2/1to5kb.NKX2-2/CDS.NKX2-2/5UTR.NKX2-2/exon.NKX2-2/intron.NKX2-2/3UTR.NKX2-2/intergenic.NA	0.000335131	hyper
chr10	99788951	99791570	shore:24413/island:13323/shore:24414	promoter.CRTAC1/CDS.CRTAC1/5UTR.CRTAC1/exon.CRTAC1/intron.CRTAC1	0.000336762	hyper
chr3	181440991	181442620	shelf:8399/shore:9523	intron.SOX2-OT	0.000336762	hyper
chr15	93584221	93585250	shelf:29302	intergenic.NA	0.00034096	hypo
chr5	145721871	145723210	shore:13273/island:7226/shore:13274	intergenic.NA	0.00034325	hyper
chr2	241392181	241394190	island:4062/shore:7495	1to5kb.MIR149/intron.GPC1/intron.LOC100130449	0.000344471	hyper
chr2	118593401	118595070	shore:6084/island:3289/shore:6085	intergenic.NA	0.000349594	hyper
chr8	65492621	65494690	shore:19957/island:10897/shore:19958	promoter.BHLHE22/promoter.LOC401463/1to5kb.LOC401463/CDS.BHLHE22/5UTR.BHLHE22/exon.BHLHE22/exon.LOC401463/intron.LOC401463/3UTR.BHLHE22	0.000350286	hyper
chr9	137392741	137394120	shore:22767/island:12424/shore:22768	intergenic.NA	0.000354852	hyper
chr12	133022601	133023020	shore:29905/island:16345/shore:29906	intergenic.NA	0.000354852	hypo
chr15	99303591	99304140	inter:13943	intron.IGF1R	0.000355125	hyper
chr18	74961211	74965000	shore:40277/island:22079/shore:40278	promoter.GALR1/CDS.GALR1/5UTR.GALR1/exon.GALR1/intron.GALR1	0.000366025	hyper
chr19	1761871	1763300	shore:40864/island:22474/shore:40865	intron.ONECUT3	0.000366128	hyper
chr2	231732471	231733040	shore:7224/shelf:6320	intron.ITM2C	0.000366128	hyper
chr10	16561111	16564100	shore:23441/island:12816/shore:23442	promoter.C1QL3/CDS.C1QL3/5UTR.C1QL3/exon.C1QL3/intron.C1QL3	0.000366697	hyper
chr3	147141841	147142670	shore:9293/island:5025/shore:9294	intergenic.NA	0.00036815	hyper
chr6	166421621	166423010	shore:15987/island:8701/shore:15988	intergenic.NA	0.00036913	hyper
chr4	8783851	8784300	inter:4330	intergenic.NA	0.000373753	hypo
chr11	94473241	94474740	shore:27228/island:14904/shore:27229	intergenic.NA	0.000374455	hyper
chr12	120031241	120033520	shore:29400/island:16064/shore:29401	promoter.TMEM233/promoter.NA/1to5kb.NA/CDS.TMEM233/5UTR.TMEM233/exon.TMEM233/exon.NA/intron.TMEM233/intron.NA	0.00037465	hyper
chr19	31839321	31843340	shore:42784/island:23607/shore:42785	promoter.TSHZ3/1to5kb.TSHZ3/CDS.TSHZ3/5UTR.TSHZ3/exon.TSHZ3/intron.TSHZ3	0.000374765	hyper
chr22	50509641	50510170	inter:19055	intron.MLC1	0.000380625	hypo
chr1	57887691	57890870	shore:2134/island:1169/shore:2135	promoter.DAB1/1to5kb.DAB1/5UTR.DAB1/exon.DAB1/intron.DAB1	0.000381521	hyper
chr18	67067281	67069530	shore:40196/island:22036/shore:40197	promoter.DOK6/1to5kb.DOK6/CDS.DOK6/5UTR.DOK6/exon.DOK6/intron.DOK6	0.000381521	hyper
chr20	55967371	55968590	shore:45747	CDS.RBM38/exon.RBM38/intron.NA/intron.RBM38	0.000388761	hyper
chr1	67217511	67218770	shore:2222/island:1215/shore:2223	promoter.TCTEX1D1/5UTR.TCTEX1D1/exon.TCTEX1D1/intron.TCTEX1D1	0.000391769	hyper
chr8	114444561	114446220	shore:20362/island:11110/shore:20363	intron.CSMD3	0.000394236	hyper
chr17	37321141	37322590	shore:37828/island:20733/shore:37829	promoter.ARL5C/CDS.ARL5C/5UTR.ARL5C/exon.ARL5C/intron.ARL5C	0.000394709	hyper
chr7	128337321	128338130	inter:7569	intergenic.NA	0.000397557	hyper
chr7	600081	602100	shore:16304/island:8880/shore:16305	intron.PRKAR1B	0.00040098	hyper
chr11	16631631	16633080	shore:25792/island:14117/shore:25793	1to5kb.SOX6/intron.SOX6	0.000403096	hyper
chr19	30015571	30021590	shore:42746/island:23585/shore:42747	promoter.VSTM2B/promoter.LOC284395/1to5kb.VSTM2B/1to5kb.LOC284395/CDS.VSTM2B/exon.VSTM2B/exon.LOC284395/intron.VSTM2B/intron.LOC284395	0.000404561	hyper
chr2	97192201	97193910	shore:5800/island:3139/shore:5801	intergenic.NA	0.000404561	hyper
chr1	22140231	22141790	shore:1072/island:611/shore:1073	CDS.LDLRAD2/exon.LDLRAD2/intron.LDLRAD2	0.000410439	hyper
chr5	180033241	180033770	inter:5763	intron.FLT4	0.000410439	hypo
chr11	30037391	30039390	shore:25920/island:14186/shore:25921/island:14187/shore:25922/island:14188/shore:25923	promoter.KCNA4/1to5kb.NA/5UTR.KCNA4/exon.KCNA4/intron.KCNA4	0.000415049	hyper
chr12	54359431	54360980	shore:28587/island:15622/shore:28588/island:15623/shore:28589	promoter.NA/1to5kb.NA/exon.HOTAIR/intron.HOTAIR	0.000419905	hyper
chr11	31817531	31821760	shelf:22353/shore:25934/island:14195/shore:25935	intron.PAX6	0.000424171	hyper
chr4	147557941	147562320	shore:11335/island:6152/shore:11336/island:6153/shore:11337	promoter.POU4F2/1to5kb.POU4F2/CDS.POU4F2/5UTR.POU4F2/exon.POU4F2/intron.POU4F2/3UTR.POU4F2	0.000427166	hyper
chr3	44036281	44038880	shore:8117/island:4401	intergenic.NA	0.000428147	hyper
chr7	84814421	84816690	shore:17819/island:9734/shore:17820	promoter.SEMA3D/5UTR.SEMA3D/exon.SEMA3D/intron.SEMA3D	0.000428277	hyper
chr17	10100721	10102900	shore:37163/island:20373/shore:37164	promoter.GAS7/1to5kb.GAS7/CDS.GAS7/5UTR.GAS7/exon.GAS7/intron.GAS7	0.000434664	hyper
chr9	117149621	117150680	inter:9149	promoter.AKNA/5UTR.AKNA/exon.AKNA/intron.AKNA	0.000440229	hyper
chr18	59000411	59002000	shore:40158/island:22016/shore:40159	promoter.CDH20/5UTR.CDH20/exon.CDH20/intron.CDH20	0.000440653	hyper
chr7	153444111	153447130	shore:18767/island:10242/shore:18768	intergenic.NA	0.000441959	hyper
chr7	1703591	1706690	shore:16498/island:9003	intergenic.NA	0.00044499	hyper
chr3	71801901	71804560	shore:8611/island:4669/shore:8612	promoter.GPR27/promoter.EIF4E3/1to5kb.GPR27/1to5kb.EIF4E3/CDS.GPR27/5UTR.EIF4E3/exon.GPR27/exon.EIF4E3/intron.EIF4E3	0.000448772	hyper
chr6	19892371	19892730	inter:5899	intergenic.NA	0.000451932	hypo
chr13	96204211	96206180	shore:30628/island:16743/shore:30629	promoter.CLDN10/CDS.CLDN10/5UTR.CLDN10/exon.CLDN10/intron.CLDN10	0.000452201	hyper
chr1	120904391	120906700	shore:2769/island:1505/shore:2770/island:1506/shore:2771	promoter.HIST2H2BA/promoter.NA/1to5kb.HIST2H2BA/1to5kb.NA/exon.HIST2H2BA/exon.NA/intron.HIST2H2BA	0.000452201	hyper
chr20	44036771	44037530	shore:45524	CDS.SYS1-DBNDD2/CDS.DBNDD2/5UTR.SYS1-DBNDD2/5UTR.DBNDD2/exon.SYS1-DBNDD2/exon.DBNDD2/intron.SYS1-DBNDD2/intron.DBNDD2	0.000452826	hyper
chr11	128657511	128658200	inter:11332	intron.FLI1	0.000456006	hypo
chr14	75077021	75079050	shore:31831/island:17406	promoter.LTBP2/CDS.LTBP2/5UTR.LTBP2/exon.LTBP2/intron.LTBP2	0.000456273	hyper
chr6	137814051	137815980	shore:15679/island:8542/shore:15680	promoter.OLIG3/CDS.OLIG3/5UTR.OLIG3/exon.OLIG3/3UTR.OLIG3	0.000456657	hyper
chr8	70946201	70947830	shore:20008/island:10924/shore:20009	intergenic.NA	0.00045893	hyper
chr13	102568151	102570200	shore:30695/island:16780/shore:30696	promoter.FGF14/1to5kb.FGF14/CDS.FGF14/exon.FGF14/intron.FGF14	0.00045893	hyper
chr15	39871821	39872290	shore:32839	promoter.THBS1/1to5kb.THBS1	0.00045893	hypo
chr5	54179131	54180950	shore:12264/island:6671/shore:12265	intergenic.NA	0.00045925	hyper
chr14	32413001	32413500	inter:12810	intergenic.NA	0.00045925	hypo
chr11	31841011	31842450	shore:25940/island:14200/shore:25941	1to5kb.PAX6/intron.PAX6-AS1/intron.RCN1	0.00045925	hyper
chr7	128550161	128551240	shore:18379/island:10031/shore:18380	promoter.KCP/CDS.KCP/5UTR.KCP/exon.KCP/intron.KCP	0.000459649	hyper
chr9	32782541	32783970	shore:21173/island:11573/shore:21174	promoter.TMEM215/promoter.NA/1to5kb.NA/5UTR.TMEM215/exon.TMEM215/intron.TMEM215	0.000468641	hyper
chr4	8892831	8896450	shore:10382/island:5636/shore:10383	intergenic.NA	0.000473598	hyper
chr2	95663601	95664730	shore:5742/island:3109/shore:5743	intergenic.NA	0.000473598	hyper
chr3	44063051	44064090	shore:8119/island:4402/shore:8120	intergenic.NA	0.000475226	hyper
chr12	54328981	54330610	shelf:24688	1to5kb.HOXC13/exon.HOXC13-AS/intron.HOXC13-AS	0.000480836	hyper
chr2	223161311	223162330	shore:7155/island:3882/shore:7156	promoter.CCDC140/1to5kb.CCDC140/CDS.PAX3/exon.PAX3/intron.PAX3	0.000483433	hyper
chr3	173302431	173303790	inter:4003	promoter.NLGN1/5UTR.NLGN1/exon.NLGN1/intron.NLGN1	0.000487445	hyper
chr10	102505391	102506390	island:13373/shore:24495	promoter.PAX2/1to5kb.PAX2/CDS.PAX2/5UTR.PAX2/exon.PAX2/intron.PAX2	0.000491095	hyper
chr17	38178831	38179920	inter:15366	promoter.MED24/1to5kb.MED24/CDS.MED24/5UTR.MED24/exon.MED24/intron.MED24	0.000493819	hyper
chr10	119494161	119495290	shore:24787/island:13538/shore:24788	intergenic.NA	0.000500285	hyper
chr10	43485591	43485990	inter:9732	intergenic.NA	0.000503997	hypo
chr22	49816791	49817200	inter:19033	intron.NA	0.000505263	hypo
chr17	77775511	77776130	island:21436	1to5kb.CBX8/intergenic.NA	0.000507488	hyper
chr1	10731031	10733880	inter:210	intron.CASZ1	0.000507488	hyper
chr5	59188731	59190220	shore:12306/island:6696/shore:12307	promoter.PDE4D/CDS.PDE4D/5UTR.PDE4D/exon.PDE4D/intron.PDE4D	0.000507711	hyper
chr19	37463191	37465000	shore:43064/island:23768/shore:43065	promoter.ZNF568/CDS.ZNF568/5UTR.ZNF568/exon.ZNF568/intron.ZNF568	0.000508187	hyper
chr10	35896251	35897720	shore:23619/island:12912/shore:23620	CDS.GJD4/exon.GJD4/intron.GJD4/3UTR.GJD4	0.000508187	hyper
chr3	128273131	128275050	shore:9022/island:4879/shore:9023	intergenic.NA	0.000510051	hyper
chr1	145943491	145946240	shore:2848/island:1547/shore:2849/island:1548/shore:2850	promoter.NA/1to5kb.NA/intron.NBPF20/intron.NBPF10	0.000510051	hyper
chr22	39851911	39854330	shore:47642/island:26329/shore:47643/island:26330/shore:47644	promoter.MGAT3/1to5kb.MGAT3/5UTR.MGAT3/exon.MGAT3/intron.MGAT3	0.000510643	hyper
chr12	114840631	114844580	shore:29320/island:16017/shore:29321/island:16018/shore:29322	promoter.TBX5/1to5kb.TBX5-AS1/1to5kb.TBX5/CDS.TBX5/5UTR.TBX5/exon.TBX5/intron.TBX5	0.000511116	hyper
chr4	5457171	5457680	inter:4281	intron.STK32B	0.000511116	hypo
chr1	20878541	20880870	shore:1026/island:587/shore:1027	promoter.FAM43B/CDS.FAM43B/5UTR.FAM43B/exon.FAM43B/3UTR.FAM43B	0.000512666	hyper
chr19	39737361	39739680	shore:43219/island:23859/shore:43220	promoter.IFNL4/1to5kb.IFNL3/CDS.IFNL4/5UTR.IFNL4/exon.IFNL4/intron.IFNL4/3UTR.IFNL4	0.000513961	hyper
chr10	115803641	115805390	island:13501	promoter.ADRB1/CDS.ADRB1/5UTR.ADRB1/exon.ADRB1/3UTR.ADRB1	0.000516662	hyper
chr3	35680091	35681920	shore:7993/island:4336/shore:7994	promoter.ARPP21/1to5kb.ARPP21/5UTR.ARPP21/exon.ARPP21/intron.ARPP21	0.000516751	hyper
chr12	132144891	132148100	shore:29778/island:16265/shore:29779	intergenic.NA	0.000520909	hyper
chr8	72916961	72917930	shore:20025/island:10933/shore:20026	intron.MSC-AS1	0.000522009	hyper
chr1	147781151	147782800	shore:2921/island:1592/shore:2922	promoter.NA/1to5kb.NA/intron.NBPF8	0.000522009	hyper
chr12	132951111	132951600	inter:12262	intergenic.NA	0.000522844	hypo
chr6	26766061	26767840	inter:5940	promoter.NA/exon.NA/intergenic.NA	0.000523163	hyper
chr2	220222771	220224110	shore:7113/island:3856/shore:7114	intergenic.NA	0.000527083	hyper
chr10	131756501	131759050	shore:24973/island:13637/shore:24974	CDS.EBF3/exon.EBF3/intron.EBF3	0.000527083	hyper
chr1	224693701	224694280	inter:1689	intergenic.NA	0.000527083	hyper
chr5	169930651	169932120	shore:13486/island:7339/shore:13487	promoter.KCNIP1/CDS.KCNIP1/5UTR.KCNIP1/exon.KCNIP1/intron.KCNIP1	0.000530499	hyper
chr2	45227171	45229000	shore:5178/island:2806/shore:5179	intergenic.NA	0.00053257	hyper
chr20	21376091	21378910	shore:45092/island:24934/shore:45093	promoter.NKX2-4/CDS.NKX2-4/5UTR.NKX2-4/exon.NKX2-4/intron.NKX2-4/3UTR.NKX2-4	0.000537001	hyper
chr10	105036311	105038610	shore:24619/island:13448/shore:24620	promoter.INA/promoter.NA/1to5kb.NA/CDS.INA/5UTR.INA/exon.INA/exon.NA/intron.INA	0.000543281	hyper
chr4	7194181	7195670	shore:10316/island:5600/shore:10317	promoter.SORCS2/CDS.SORCS2/exon.SORCS2/intron.SORCS2	0.000543281	hyper
chr19	30555201	30555820	inter:17037	intergenic.NA	0.000544602	hypo
chr1	967791	971220	shore:50/island:29/shore:51	CDS.AGRN/exon.AGRN/intron.AGRN	0.000545499	hyper
chr3	14851381	14853520	shore:7855/island:4261/shore:7856	intergenic.NA	0.000548898	hyper
chr16	28876951	28879080	shore:35118/shelf:30167	CDS.SH2B1/5UTR.SH2B1/exon.SH2B1/intron.SH2B1/intron.NA	0.00054938	hyper
chr1	2391041	2391570	shelf:192	intergenic.NA	0.000550909	hypo
chr7	2081391	2087220	inter:6830/shelf:14340	intron.MAD1L1	0.000555796	hyper
chr2	162272951	162274230	shore:6531/island:3531/shore:6532	promoter.TBR1/1to5kb.TBR1/CDS.TBR1/exon.TBR1/intron.TBR1	0.000560599	hyper
chr4	41881831	41884780	shore:10605/island:5758/shore:10606/island:5759/shore:10607	promoter.NA/exon.NA/intron.NA	0.000565114	hyper
chr1	101004261	101006130	shore:2502/island:1365/shore:2503	promoter.NA/CDS.GPR88/CDS.NA/5UTR.GPR88/exon.GPR88/exon.NA/intron.GPR88/3UTR.GPR88	0.000565114	hyper
chr9	974241	978160	shore:20950/island:11453/shore:20951	promoter.DMRT3/1to5kb.DMRT3/CDS.DMRT3/5UTR.DMRT3/exon.DMRT3/intron.DMRT3	0.000565944	hyper
chr14	63511651	63513810	shore:31636/island:17306/shore:31637	promoter.KCNH5/1to5kb.KCNH5/CDS.KCNH5/5UTR.KCNH5/exon.KCNH5/intron.KCNH5	0.00057079	hyper
chr3	197807961	197808990	island:5309/shore:9831	promoter.ANKRD18DP/1to5kb.ANKRD18DP	0.000580445	hyper
chr11	134145291	134148130	shore:27724/island:15165/shore:27725	promoter.GLB1L3/1to5kb.GLB1L3/CDS.GLB1L3/5UTR.GLB1L3/exon.GLB1L3/intron.GLB1L3	0.000580445	hyper
chr11	57414181	57414930	shore:26218/island:14353/shore:26219	CDS.YPEL4/5UTR.YPEL4/exon.YPEL4/intron.NA/intron.YPEL4	0.000588804	hyper
chr10	132876901	132877740	shelf:21647	intergenic.NA	0.000591232	hypo
chr12	3566991	3567550	inter:11424	1to5kb.NA/intron.PRMT8	0.000596715	hypo
chr14	60981221	60983150	shore:31603/island:17289/shore:31604	intergenic.NA	0.000597268	hyper
chr16	86527581	86529290	shore:36218/island:19828/shore:36219	intron.FENDRR	0.000597541	hyper
chr12	54354101	54355840	shore:28585/island:15621/shore:28586	intergenic.NA	0.000602489	hyper
chr1	147504771	147506570	shore:2897/island:1577/shore:2898	promoter.NA/exon.NA/intergenic.NA	0.000602902	hyper
chr11	65600441	65601810	shore:26612/island:14572/shore:26613	promoter.SNX32/CDS.SNX32/5UTR.SNX32/exon.SNX32/intron.SNX32	0.000602902	hyper
chr16	88366781	88367160	inter:14799	intergenic.NA	0.000603324	hypo
chr21	22369141	22371090	shore:46286/island:25602/shore:46287	promoter.NCAM2/1to5kb.NCAM2/CDS.NCAM2/5UTR.NCAM2/exon.NCAM2/intron.NCAM2	0.000604271	hyper
chr19	58950901	58952650	shore:44735/island:24737/shore:44736	promoter.ZNF132/1to5kb.ZNF132/CDS.ZNF132/5UTR.ZNF132/exon.ZNF132/intron.ZNF132	0.000604271	hyper
chr10	25464131	25465890	island:12861/shore:23522	promoter.GPR158/promoter.GPR158-AS1/CDS.GPR158/CDS.GPR158-AS1/5UTR.GPR158/5UTR.GPR158-AS1/exon.GPR158/exon.GPR158-AS1/intron.GPR158/intron.GPR158-AS1/3UTR.GPR158-AS1	0.000604659	hyper
chr17	48040891	48043310	shore:38409/island:21059/shore:38410	1to5kb.DLX4/intergenic.NA	0.000608247	hyper
chr9	98336771	98337320	inter:9016	intergenic.NA	0.000611267	hypo
chr9	6644071	6646240	shore:21020/island:11491/shore:21021	promoter.GLDC/CDS.GLDC/5UTR.GLDC/exon.GLDC/intron.GLDC	0.00061547	hyper
chr15	83314851	83317770	shore:33684/island:18395/shore:33685	promoter.CPEB1-AS1/promoter.CPEB1/1to5kb.CPEB1-AS1/1to5kb.CPEB1/CDS.CPEB1/5UTR.CPEB1/exon.CPEB1-AS1/exon.CPEB1/intron.CPEB1-AS1/intron.CPEB1	0.000615903	hyper
chr7	50342241	50344810	shore:17316/island:9463/shore:17317/island:9464/shore:17318	promoter.IKZF1/1to5kb.IKZF1/5UTR.IKZF1/exon.IKZF1/intron.IKZF1	0.000615903	hyper
chr1	4713631	4716890	shore:495/island:299/shore:496	promoter.AJAP1/1to5kb.AJAP1/CDS.AJAP1/5UTR.AJAP1/exon.AJAP1/intron.AJAP1	0.000615927	hyper
chr17	37768781	37769180	inter:15355	1to5kb.NEUROD2/intergenic.NA	0.000615927	hypo
chr6	55038951	55040120	shore:15087/island:8222/shore:15088	promoter.HCRTR2/CDS.HCRTR2/5UTR.HCRTR2/exon.NA/exon.HCRTR2/intron.NA/intron.HCRTR2	0.000615927	hyper
chr4	8270451	8272340	shore:10342/island:5613/shore:10343	promoter.HTRA3/1to5kb.HTRA3/CDS.HTRA3/5UTR.HTRA3/exon.HTRA3/intron.HTRA3	0.000621393	hyper
chr2	241770811	241772500	shore:7533/island:4086/shore:7534	intergenic.NA	0.000628909	hyper
chr10	134007341	134007760	inter:10327	intron.DPYSL4	0.000630949	hypo
chr15	39876131	39876660	shelf:28330	1to5kb.THBS1/CDS.THBS1/exon.THBS1/intron.THBS1	0.000632773	hyper
chr20	20345161	20346430	island:24924	1to5kb.INSM1	0.000632925	hyper
chr12	63543411	63545620	shore:28810/island:15749/shore:28811	CDS.AVPR1A/5UTR.AVPR1A/exon.AVPR1A/intron.AVPR1A	0.000634621	hyper
chr1	2423171	2423890	inter:74	intron.PLCH2	0.000634725	hypo
chr9	79628481	79630700	shore:21642/island:11820/shore:21643/island:11821/shore:21644	1to5kb.FOXB2/intergenic.NA	0.000647646	hyper
chr12	115172111	115174470	shore:29344/island:16034	intergenic.NA	0.000662701	hyper
chr3	9594871	9595910	shore:7696/island:4179/shore:7697	promoter.LHFPL4/5UTR.LHFPL4/exon.LHFPL4/intron.LHFPL4	0.000663655	hyper
chr9	13277341	13280160	shore:21042/island:11502/shore:21043	promoter.MPDZ/5UTR.MPDZ/exon.MPDZ/intron.MPDZ	0.000663655	hyper
chr17	33813941	33816490	shore:37686/island:20654/shore:37687	promoter.SLFN12L/1to5kb.NA/1to5kb.SLFN12L/CDS.SLFN12L/exon.SLFN12L/intron.SLFN12L	0.000667249	hyper
chr16	30105861	30107040	shore:35207	promoter.NA/1to5kb.NA/1to5kb.TBX6/CDS.YPEL3/5UTR.YPEL3/exon.YPEL3/intron.BOLA2/intron.YPEL3/3UTR.YPEL3	0.000669242	hyper
chr19	17137021	17138020	inter:16883	promoter.CPAMD8/CDS.CPAMD8/5UTR.CPAMD8/exon.CPAMD8/intron.CPAMD8	0.000669462	hyper
chr7	129417021	129418990	shore:18406/island:10045	1to5kb.MIR96/1to5kb.MIR183	0.000674235	hyper
chr7	89747601	89749390	shore:17846/island:9748/shore:17847	promoter.DPY19L2P4/1to5kb.DPY19L2P4/exon.DPY19L2P4/intron.DPY19L2P4	0.00067546	hyper
chr5	3594101	3598080	shore:11973/island:6517	promoter.IRX1/1to5kb.IRX1/CDS.IRX1/5UTR.IRX1/exon.IRX1/intron.IRX1	0.000676414	hyper
chr20	60540021	60541040	shore:45858/island:25345/shore:45859	intergenic.NA	0.000676414	hyper
chr11	65358351	65361520	shore:26583/island:14556/shore:26584	CDS.EHBP1L1/CDS.KCNK7/exon.EHBP1L1/exon.KCNK7/intron.EHBP1L1/intron.KCNK7/3UTR.EHBP1L1/3UTR.KCNK7/intergenic.NA	0.000676414	hyper
chr12	54338541	54339820	shore:28578/island:15616/shore:28579	CDS.HOXC13/exon.HOXC13/intron.HOXC13/3UTR.HOXC13	0.000677159	hyper
chr21	19616841	19618320	shore:46284/island:25601/shore:46285	promoter.CHODL/1to5kb.CHODL/CDS.CHODL/5UTR.CHODL/exon.CHODL/intron.CHODL	0.000678836	hyper
chr19	41931261	41932690	inter:17266	promoter.NA/CDS.B3GNT8/CDS.NA/5UTR.B3GNT8/exon.B3GNT8/exon.NA/intron.NA/3UTR.B3GNT8/intergenic.NA	0.000681181	hyper
chr5	79330671	79331730	shore:12533/island:6815/shore:12534	promoter.THBS4/CDS.THBS4/5UTR.THBS4/exon.THBS4/intron.THBS4	0.00068166	hyper
chr17	43047281	43048800	shore:38145/island:20909/shore:38146	1to5kb.C1QL1	0.00068166	hyper
chr11	32451821	32453380	shore:25952/island:14207/shore:25953	promoter.WT1/1to5kb.WT1-AS/1to5kb.WT1/CDS.WT1/5UTR.WT1/exon.WT1/intron.WT1	0.000682522	hyper
chr15	53078921	53084080	shore:33119/island:18099/shore:33120/island:18100/shore:33121	promoter.ONECUT1/1to5kb.ONECUT1/CDS.ONECUT1/5UTR.ONECUT1/exon.ONECUT1/intron.ONECUT1	0.000682979	hyper
chr5	16666491	16667170	inter:5039	CDS.MYO10/exon.MYO10/intron.MYO10/3UTR.MYO10	0.000684054	hyper
chr20	55972301	55980610	inter:18144/shelf:38586	intron.NA/intron.RBM38	0.000684183	hyper
chr1	197890171	197891070	shore:3716/island:2018/shore:3717	CDS.LHX9/exon.LHX9/intron.LHX9	0.000684183	hyper
chr8	3100281	3100650	inter:7905	intron.CSMD1	0.000685245	hypo
chr12	85667051	85667920	inter:11889	intergenic.NA	0.000689685	hyper
chr9	139084391	139086360	shore:22867/island:12481/shore:22868	promoter.NA/CDS.NA/5UTR.NA/exon.NA/3UTR.NA/intergenic.NA	0.000690539	hyper
chr3	42328991	42329560	inter:3379	intergenic.NA	0.000690539	hypo
chr2	84180301	84180850	inter:2328	intergenic.NA	0.000691556	hypo
chr16	66637551	66639710	shore:35745/island:19574/shore:35746	promoter.CMTM3/1to5kb.CMTM3/CDS.CMTM3/5UTR.CMTM3/exon.CMTM3/intron.CMTM3	0.000697951	hyper
chr1	155659381	155659870	shore:3242	promoter.YY1AP1/1to5kb.YY1AP1/intron.DAP3/intron.YY1AP1	0.000698248	hypo
chr7	569721	570500	shore:16296/island:8874/shore:16297	intergenic.NA	0.000698248	hypo
chr14	36986111	36988650	shore:31359/island:17156	promoter.NA/1to5kb.NA/1to5kb.SFTA3/CDS.NKX2-1/5UTR.NKX2-1/exon.NA/exon.NKX2-1/intron.SFTA3/intron.NKX2-1/3UTR.NKX2-1	0.00069962	hyper
chr4	5052241	5054320	shore:10249/island:5564/shore:10250	promoter.STK32B/1to5kb.STK32B/CDS.STK32B/5UTR.STK32B/exon.STK32B/intron.STK32B	0.000704524	hyper
chr11	65816161	65817030	shore:26636/island:14585/shore:26637	promoter.GAL3ST3/1to5kb.SF3B2/1to5kb.GAL3ST3/5UTR.GAL3ST3/exon.GAL3ST3/intron.GAL3ST3	0.00070598	hyper
chr10	100991861	100993000	shore:24421/island:13327/shore:24422	CDS.HPSE2/exon.HPSE2/intron.HPSE2	0.000708066	hyper
chr4	8868741	8870710	shore:10378/island:5633/shore:10379	CDS.HMX1/exon.HMX1/intron.HMX1/3UTR.HMX1/intergenic.NA	0.000717729	hyper
chr6	85472011	85477570	shore:15241/island:8302/shore:15242/shelf:13259	promoter.TBX18/1to5kb.TBX18/CDS.TBX18/5UTR.TBX18/exon.TBX18/intron.TBX18	0.000719841	hyper
chr14	57274301	57277120	shore:31544/island:17257/shore:31545	1to5kb.OTX2-AS1/1to5kb.OTX2/5UTR.OTX2/exon.OTX2/intron.OTX2	0.000720031	hyper
chr5	76923451	76924720	shore:12494/island:6794/shore:12495	exon.OTP/3UTR.OTP/intergenic.NA	0.000722887	hyper
chr13	39489841	39490230	inter:12440	intergenic.NA	0.00072797	hypo
chr1	3679511	3680770	inter:122	CDS.CCDC27/exon.CCDC27/intron.CCDC27	0.000735202	hypo
chr11	109292521	109295410	shore:27309/island:14946/shore:27310	promoter.C11orf87/promoter.NA/1to5kb.NA/CDS.C11orf87/CDS.NA/5UTR.C11orf87/exon.C11orf87/exon.NA/intron.C11orf87/3UTR.C11orf87	0.000735855	hyper
chr1	237204821	237206940	shore:4397/island:2384/shore:4398	promoter.RYR2/CDS.RYR2/5UTR.RYR2/exon.RYR2/intron.RYR2	0.000740072	hyper
chr11	133938591	133939990	shore:27715/island:15160/shore:27716	promoter.JAM3/CDS.JAM3/5UTR.JAM3/exon.JAM3/intron.JAM3	0.000747405	hyper
chr7	5197621	5198070	inter:6883	intergenic.NA	0.000756098	hypo
chr2	242927311	242928180	shore:7633/island:4144/shore:7634	intergenic.NA	0.000756368	hypo
chr11	45376671	45377460	shore:26064/island:14269/shore:26065	intergenic.NA	0.000764663	hyper
chr6	101846481	101847990	shore:15374/island:8379/shore:15375	promoter.GRIK2/CDS.GRIK2/5UTR.GRIK2/exon.NA/exon.GRIK2/intron.NA/intron.GRIK2	0.000770733	hyper
chr15	101512931	101514600	shore:34009/island:18569/shore:34010	CDS.LRRK1/exon.LRRK1/intron.LRRK1	0.000771719	hyper
chr7	749761	753050	shore:16320/island:8890/shore:16321/island:8891/shore:16322	promoter.PRKAR1B/CDS.PRKAR1B/5UTR.PRKAR1B/exon.PRKAR1B/intron.PRKAR1B	0.000775377	hyper
chr5	133448481	133450130	shore:12892/island:7007	promoter.TCF7/1to5kb.TCF7	0.000775377	hyper
chr1	197888551	197889960	shore:3716	CDS.LHX9/exon.LHX9/intron.LHX9	0.000775377	hyper
chr20	3778041	3778580	shore:44932	1to5kb.CDC25B/CDS.CDC25B/5UTR.CDC25B/exon.CDC25B/intron.CDC25B	0.000775377	hypo
chr6	137816151	137819680	shore:15680/island:8543/shore:15681/island:8544/shore:15682	promoter.OLIG3/1to5kb.OLIG3	0.000779423	hyper
chr3	121280101	121280550	inter:3724	intergenic.NA	0.000779423	hypo
chr7	155257811	155261660	shore:18804/island:10264/shore:18805	intergenic.NA	0.000793111	hyper
chr5	177432951	177435760	shore:13716/island:7468/shore:13717	promoter.FAM153C/1to5kb.FAM153C/5UTR.FAM153C/exon.FAM153C/intron.FAM153C	0.000793842	hyper
chr11	112831811	112834730	shore:27350/island:14967/shore:27351	promoter.NCAM1/promoter.NA/CDS.NCAM1/5UTR.NCAM1/exon.NCAM1/exon.NA/intron.NCAM1/intron.NA	0.000793842	hyper
chr2	11051841	11054280	shore:4774/island:2587/shore:4775/island:2588/shore:4776	promoter.KCNF1/CDS.KCNF1/5UTR.KCNF1/exon.KCNF1/3UTR.KCNF1	0.000796518	hyper
chr4	9782701	9785260	shore:10401/island:5646/shore:10402	promoter.DRD5/CDS.DRD5/5UTR.DRD5/exon.DRD5/3UTR.DRD5	0.000797947	hyper
chr7	100942281	100944110	inter:7458	intergenic.NA	0.000808332	hyper
chr10	23487511	23489910	shore:23508/island:12854/shore:23509	intergenic.NA	0.000814991	hyper
chr17	76880011	76881740	inter:15861	intron.TIMP2	0.000815396	hypo
chr10	8075681	8078680	shore:23355/island:12770/shore:23356/island:12771/shore:23357	intergenic.NA	0.000815707	hyper
chr1	10842441	10843140	inter:211	intron.CASZ1	0.000817466	hyper
chr20	62582041	62583050	inter:18265/shelf:38874	promoter.UCKL1/1to5kb.UCKL1-AS1/CDS.UCKL1/5UTR.UCKL1/exon.UCKL1/intron.UCKL1	0.000819382	hyper
chr15	65115371	65117090	shore:33263/island:18176/shore:33264	1to5kb.PIF1/CDS.PIF1/5UTR.PIF1/exon.PIF1/intron.PIF1	0.000819967	hyper
chr7	90225651	90226770	island:9754/shore:17859	promoter.CDK14/CDS.CDK14/5UTR.CDK14/exon.CDK14/intron.CDK14	0.000825573	hyper
chr12	104850181	104852740	shore:29116/island:15906/shore:29117	promoter.CHST11/CDS.CHST11/5UTR.CHST11/exon.CHST11/intron.CHST11	0.000826838	hyper
chr19	20842631	20844670	inter:16989	promoter.ZNF626/CDS.ZNF626/5UTR.ZNF626/exon.ZNF626/intron.ZNF626	0.000827657	hyper
chr6	27859681	27860170	shore:14359	1to5kb.HIST1H2BO/1to5kb.HIST1H3J	0.000829188	hypo
chr7	155255941	155256610	shore:18804	exon.EN2/3UTR.EN2	0.000829653	hyper
chr17	36734331	36735530	shore:37799/island:20717/shore:37800	CDS.SRCIN1/exon.SRCIN1/intron.SRCIN1	0.000829653	hyper
chr19	21645331	21647610	shore:42664/island:23543/shore:42665	promoter.NA/exon.NA/intron.NA	0.000832812	hyper
chr19	56904351	56905910	shore:44574/island:24652/shore:44575	promoter.ZNF582-AS1/promoter.ZNF582/1to5kb.ZNF582/CDS.ZNF582/5UTR.ZNF582/exon.ZNF582-AS1/exon.ZNF582/intron.ZNF582-AS1/intron.ZNF582	0.000838511	hyper
chr6	50689601	50690310	shelf:13075/shore:15042	intron.TFAP2D	0.000845432	hyper
chr12	34523601	34524160	inter:11589	intergenic.NA	0.000849046	hypo
chr12	115102281	115105730	shore:29331/island:16025/shore:29332/island:16026/shore:29333	intergenic.NA	0.000849046	hyper
chr16	62068201	62071110	shore:35724/island:19562/shore:35725	promoter.CDH8/5UTR.CDH8/exon.CDH8/intron.CDH8	0.000857875	hyper
chr4	5712591	5713890	shore:10254/island:5567/shore:10255	promoter.EVC/1to5kb.EVC2/CDS.EVC/5UTR.EVC/exon.EVC/intron.EVC	0.000872531	hyper
chr1	148853341	148856200	shore:2955/island:1613/shore:2956	intergenic.NA	0.000873658	hyper
chr1	108274861	108275410	inter:995	intron.VAV3	0.00087601	hypo
chr6	26770961	26771960	inter:5940	promoter.NA/exon.NA/intergenic.NA	0.000880061	hyper
chr11	122854281	122855780	shore:27545/island:15068/shore:27546	1to5kb.BSX	0.000881564	hyper
chr19	49670871	49672310	shore:44006/shelf:37136	CDS.TRPM4/5UTR.TRPM4/exon.TRPM4/intron.TRPM4	0.000883705	hyper
chr6	26734261	26736030	inter:5940	promoter.NA/exon.NA/intergenic.NA	0.000897432	hyper
[truncated: 2,090 more rows]

## Sheet: TE_DMRs Cancer vs Normal
Supplementary Table 1: Differentially methylated regions (DMRs) identified with MBDE and TE in primary CRC and/or CRC liver metastases vs. normal colon mucosa. (Sheets 1 and 2 show results obtained with MBDE for primary and metastatic CRCs, respectively; Sheet 3 shows results obtained with TE for primary CRCs.) Lists are filtered for adjusted P-value or median P-value. Chromosome coordinates base…
[truncated: 10,234 more rows]
